# Supplementary material for: A Milk Foodomics Investigation into the Effect of Pseudomonas fluorescens Growth under Cold Chain Conditions
Source: MDPI journal article supplement (doi:10.3390/foods10061173), 2021-05-24

**Supplementary file S3:** Validation of OPLS-DA discriminant model. Hotelling's T2 using 95% and 99% confidence limits is given in upper panel (A1-non heat treated sample and A2-heat treated sample), whereas outcome of permutation test (N = 200) is given in the lower one (B-non heat treated sample and B2-heat treated sample).

A1

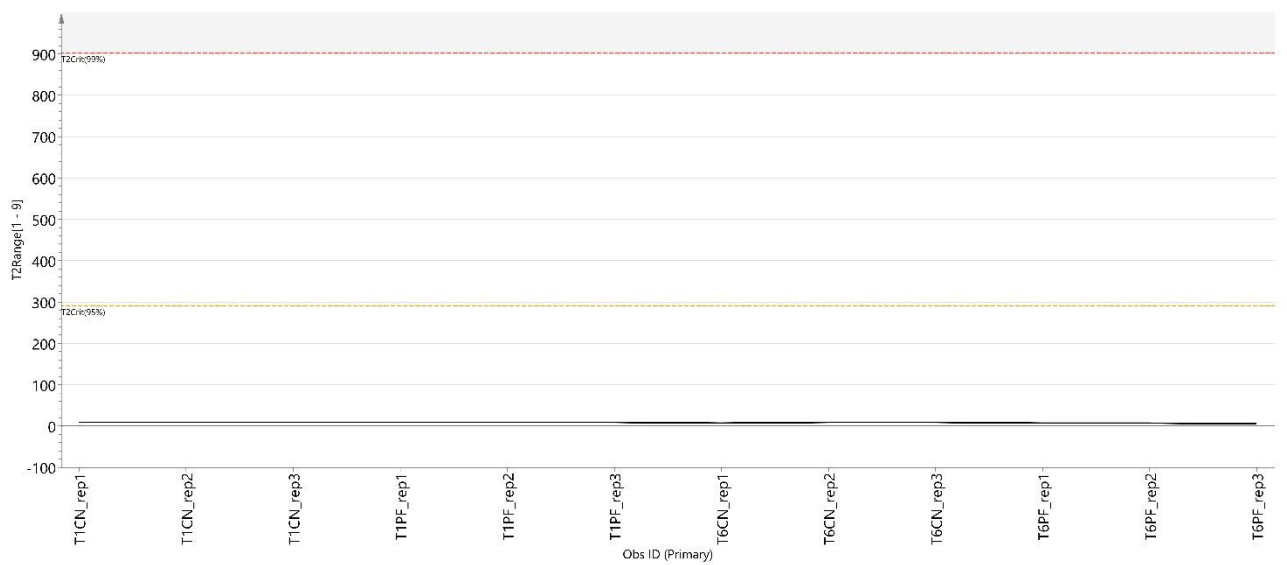

A2

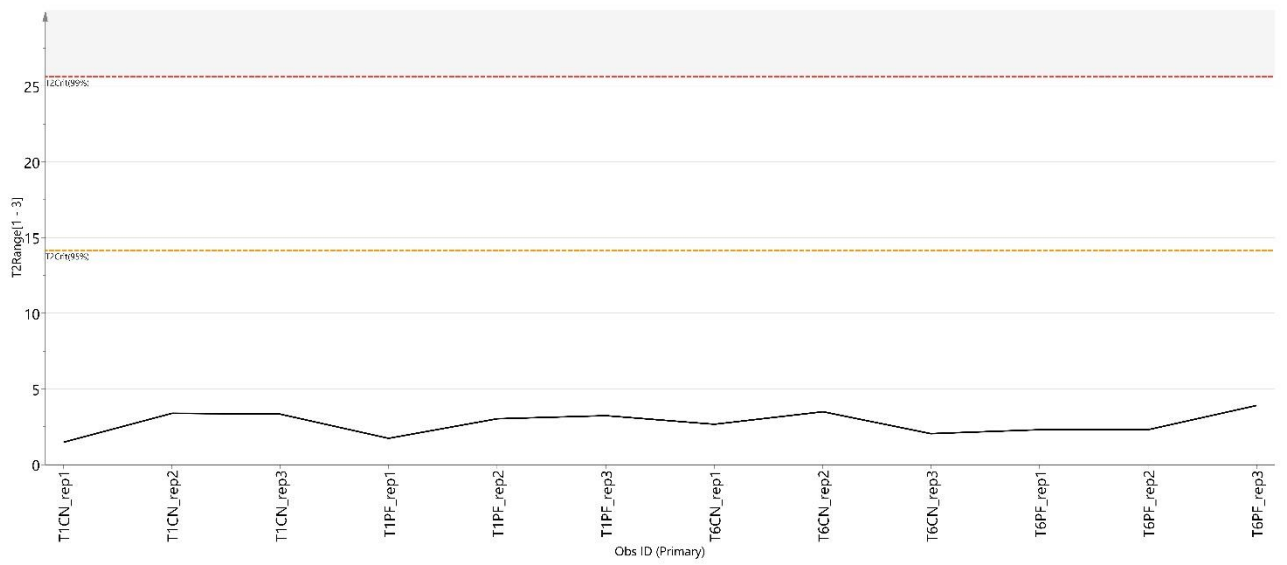

# B1

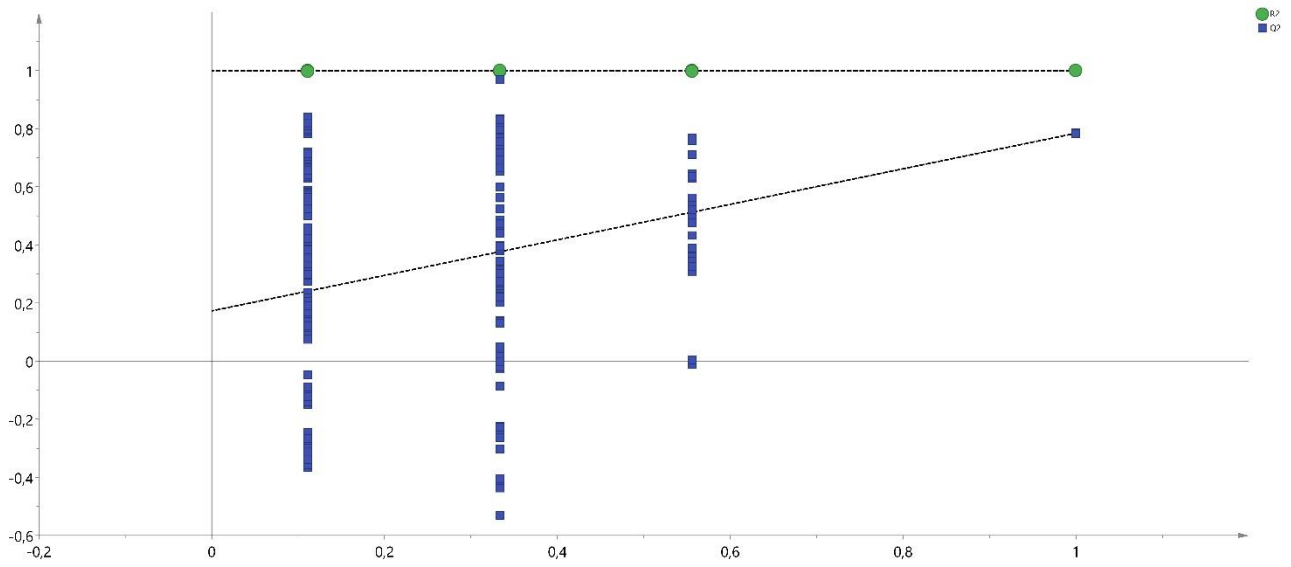

# B2

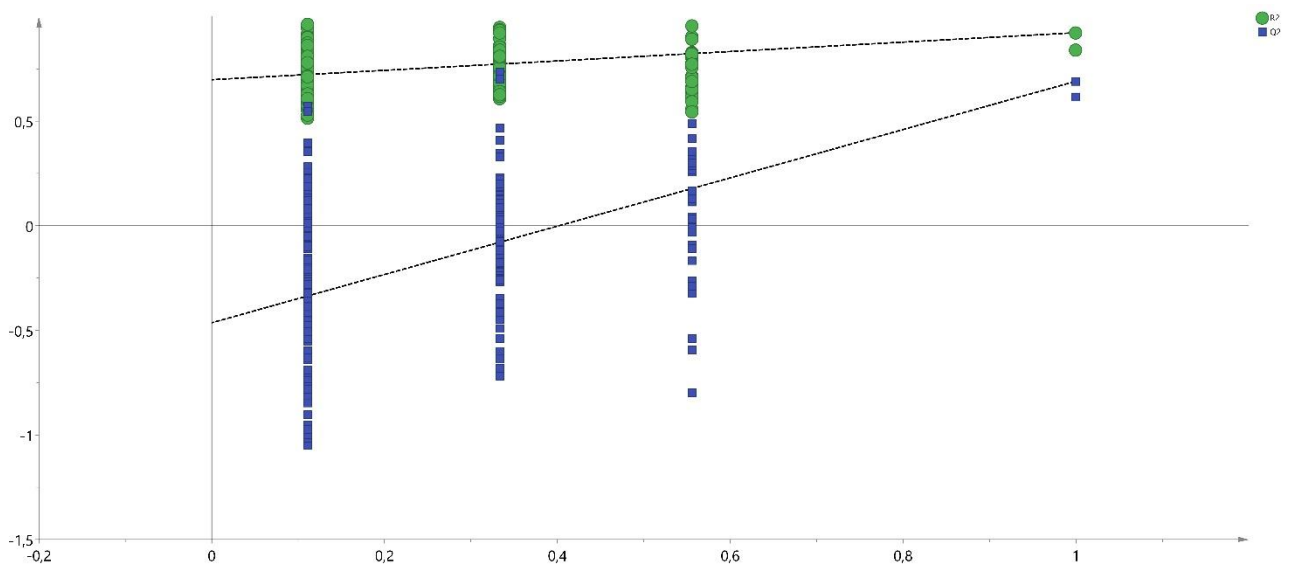

Supplement: s1 [file s1]
