# Supplementary material for: A Milk Foodomics Investigation into the Effect of Pseudomonas fluorescens Growth under Cold Chain Conditions
Source: MDPI journal article supplement (doi:10.3390/foods10061173), 2021-05-24
Supplement: s1 [file s1]

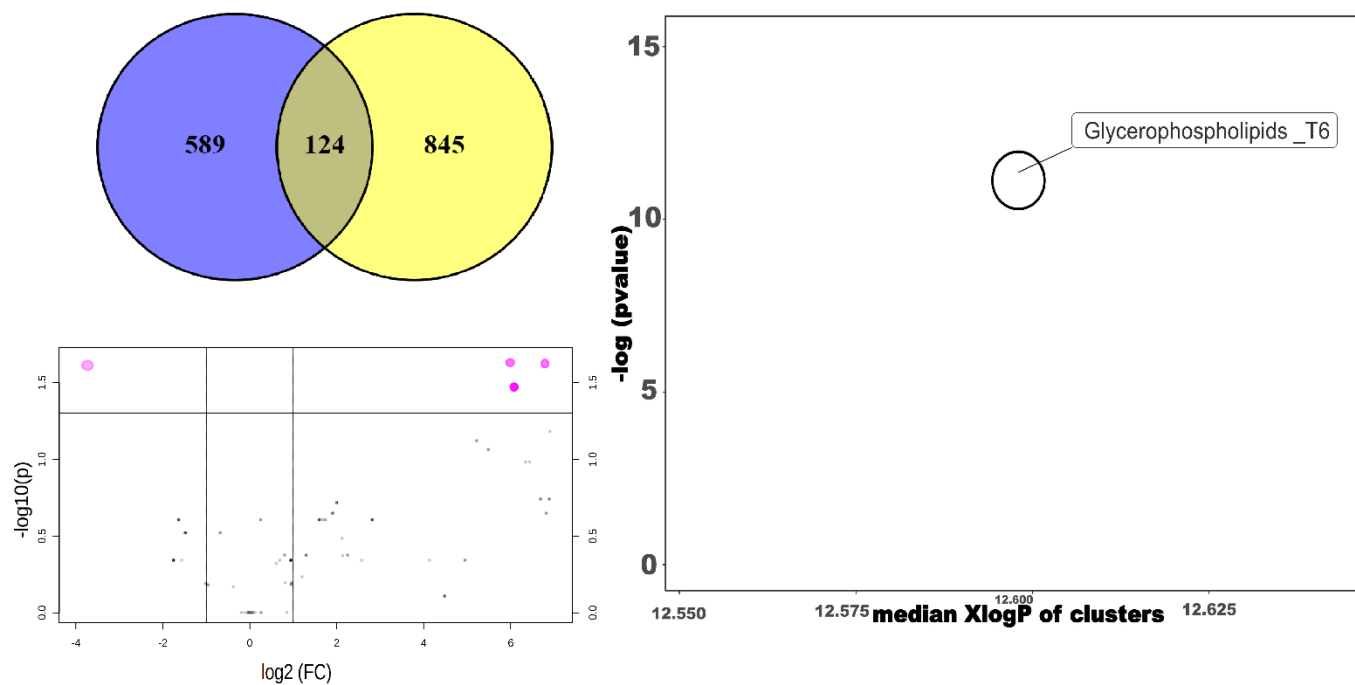

**Supplementary 3 FigureS1** Heat treated sample group; **(A)** Venn analysis built by intersecting compounds of inoculated samples incubated at 24 (blue) and 144 (yellow), using up accumulated metabolites ( $FC > 2$ ) compared to non-inoculated samples incubated 24 and 144 h. **(B)** Volcano Plot analysis ( $p\text{-value} < 0.05$  and  $FC > 2$ ) on 570 common VIP marker compounds identified at both 24 h and 144 h time points. **(C)** Chemical Enrichment analysis generated from the significant compounds: T1 = significant chemical class for inoculated samples at 24 h; T6= significant chemical class for inoculated samples at 144 h

**Supplementary 3 Table 1** Biomarker compounds from the Volcano analysis (p-value < 0.05; FC value > 2) conducted using the abundance of the compounds relative to the two incubation times, results from UP-accumulated compared to the control (non-inoculated samples), common between the two incubation times (corresponding to the two levels of *P. fluorescens* 39 contamination); **(A)** Biomarker compounds Non-heat treated sample group - *P. fluorescens* 39 growth after 24 h 6 °C, **(B)** Biomarker compounds Non-heat treated sample group - *P. fluorescens* 39 growth after 144 h 6 °C, **(C)** Biomarker compounds Heat treated sample group - *P. fluorescens* 39 growth after 24 h 6 °C, **(D)** Biomarker compounds Non-heat treated sample group - *P. fluorescens* 39 growth after 144 h 6 °C.

**Score description:**

***p-value Volcano:*** Volcano analysis applied to UP accumulated compounds common between T1 and T6 produced as output a pValue expressing a statistical difference between the abundance of compounds in the T1 vs T6 group

***VIP score (T6vsT1):*** Variable importance in projection (VIP) was extracted by conducting an OPLS-DA analysis between UP-accumulated against control(CN) T1 and UP-accumulated against control(CN) T6 compounds.

***VIP Standard error:*** VIP standard error is the standard error of the VIP Score model.

**LOG2(FC)(T1PFvsT1CN):** This value refers to the FC value for the final compounds and the uninoculated control sample (CN).

A

| <i>Non-heat treated sample group -----Pseudomonas growth after 24 h 6 °C</i> |                                      |                      |                            |                               |                               |                                  |
|------------------------------------------------------------------------------|--------------------------------------|----------------------|----------------------------|-------------------------------|-------------------------------|----------------------------------|
| <i>Database Code</i>                                                         | <i>Class</i>                         | <i>Compound Name</i> | <i>p-value<br/>Volcano</i> | <i>VIP score<br/>(T6vsT1)</i> | <i>VIP Standard<br/>error</i> | <i>LOG2(FC)(T1PFvsT1<br/>CN)</i> |
| PAMDB0005                                                                    | Alcohols and polyols                 | 3-Dehydroquinate     | 4.28E-05                   | 1.27246                       | 0.140161                      | 20.33422                         |
| 82                                                                           |                                      |                      |                            |                               |                               |                                  |
| BMDB62240                                                                    | Amino acids, peptides, and analogues | Histidiny-Proline    | 6.18E-08                   | 1.27761                       | 0.0594045                     | 12.27888                         |
| BMDB62257                                                                    | Amino acids, peptides, and analogues | Prolyl-Histidine     | 6.18E-08                   | 1.27761                       | 0.0594045                     | 12.27888                         |
| BMDB63626                                                                    | Amino acids, peptides, and analogues | Glycyl-Isoleucine    | 9.88E-06                   | 1.27551                       | 0.0925752                     | 15.70902                         |
| BMDB00759                                                                    | Amino acids, peptides, and analogues | Glycyl-L-leucine     | 9.88E-06                   | 1.27551                       | 0.0925752                     | 15.70902                         |
| BMDB00206                                                                    | Amino acids, peptides, and analogues | N6-Acetyl-L-lysine   | 9.88E-06                   | 1.27551                       | 0.0925752                     | 15.70902                         |
| BMDB00446                                                                    | Amino acids, peptides, and analogues | N-Alpha-ccetyllysine | 9.88E-06                   | 1.27551                       | 0.0925752                     | 15.70902                         |
| BMDB00670                                                                    | Amino acids, peptides, and analogues | Homo-L-arginine      | 0.000804                   | 1.25087                       | 0.289548                      | 0.33309                          |
| BMDB01890                                                                    | Amino acids, peptides, and analogues | Acetylcysteine       | 0.003296                   | 1.23151                       | 0.419201                      | 1.9797                           |
| BMDB62246                                                                    | Amino acids, peptides, and analogues | Leucyl-Serine        | 0.003293                   | 1.2306                        | 0.418402                      | 7.345736                         |

|           |                                      |                                     |          |         |          |          |
|-----------|--------------------------------------|-------------------------------------|----------|---------|----------|----------|
| BMDB62262 | Amino acids, peptides, and analogues | Threoninyl-Valine                   | 0.003293 | 1.2306  | 0.418402 | 7.345736 |
| PAMDB0001 | Amino acids, peptides, and analogues | Ureidosuccinic acid                 | 0.005891 | 1.22319 | 0.468699 | 0.043821 |
| 89        |                                      |                                     |          |         |          |          |
| BMDB00821 | Amino acids, peptides, and analogues | Phenylacetyl-glycine                | 0.006092 | 1.22243 | 0.475567 | 0.010616 |
| BMDB01539 | Amino acids, peptides, and analogues | Dimethyl-L-arginine                 | 0.009645 | 1.20819 | 0.536462 | 7.656083 |
| BMDB00267 | Amino acids, peptides, and analogues | Pyroglutamic acid                   | 0.014315 | 1.19781 | 0.602924 | 0.559079 |
| BMDB62223 | Amino acids, peptides, and analogues | Alanyl-Proline                      | 0.009221 | 1.19464 | 0.580857 | 0.127488 |
| BMDB11175 | Amino acids, peptides, and analogues | L-leucyl-L-proline                  | 0.010535 | 1.18144 | 0.547645 | 6.729813 |
| BMDB62574 | Amino acids, peptides, and analogues | Pro-Ile                             | 0.010535 | 1.18144 | 0.547645 | 6.729813 |
| BMDB05960 | Amino acids, peptides, and analogues | D-Pipecolic acid                    | 0.023623 | 1.17629 | 0.649788 | 6.424854 |
| BMDB00716 | Amino acids, peptides, and analogues | L-Pipecolic acid                    | 0.023623 | 1.17629 | 0.649788 | 6.424854 |
| BMDB00070 | Amino acids, peptides, and analogues | Pipecolic acid                      | 0.023623 | 1.17629 | 0.649788 | 6.424854 |
| BMDB63628 | Amino acids, peptides, and analogues | Phenyl-Leucine                      | 0.039477 | 1.11473 | 0.768373 | 8.06525  |
| PAMDB0003 | Benzene and substituted derivatives  | 4-Nitrophenol                       | 0.00212  | 1.24628 | 0.428985 | 6.846095 |
| 05        |                                      |                                     |          |         |          |          |
| PAMDB0009 | Benzene and substituted derivatives  | 3-Carbamoyl-2-phenylpropionaldehyde | 0.006092 | 1.22243 | 0.475567 | 0.010616 |
| 14        |                                      |                                     |          |         |          |          |

|                 |                                           |                                               |          |         |          |          |
|-----------------|-------------------------------------------|-----------------------------------------------|----------|---------|----------|----------|
| PAMDB0009<br>39 | Benzene and substituted derivatives       | 4-Hydroxy-5-phenyltetrahydro-1,3-oxazin-2-one | 0.006092 | 1.22243 | 0.475567 | 0.010616 |
| PAMDB0050<br>09 | Benzene and substituted derivatives       | Benzyl alcohol                                | 0.008693 | 1.20658 | 0.539232 | 1.336482 |
| PAMDB0017<br>47 | Benzene and substituted derivatives       | p-Cresol                                      | 0.008693 | 1.20658 | 0.539232 | 7.150248 |
| PAMDB0001<br>94 | Carbohydrates and carbohydrate conjugates | Nicotinamide riboside                         | 9.24E-05 | 1.27042 | 0.145404 | 21.32872 |
| PAMDB0001<br>60 | Carbohydrates and carbohydrate conjugates | Gluconic acid                                 | 0.004859 | 1.20642 | 0.510627 | 19.2813  |
| PAMDB0000<br>57 | Carbohydrates and carbohydrate conjugates | Gluconolactone                                | 0.004859 | 1.20642 | 0.510627 | 19.2813  |
| PAMDB0017<br>72 | Carbohydrates and carbohydrate conjugates | L-Idonate                                     | 0.004859 | 1.20642 | 0.510627 | 19.2813  |
| PAMDB0002<br>16 | Carbohydrates and carbohydrate conjugates | S-Adenosylmethioninamine                      | 0.012316 | 1.19274 | 0.600925 | 0.79528  |
| PAMDB0013<br>78 | Carboxylic acids and derivatives          | L-Ala-gamma-D-Glu-Dap                         | 2.16E-06 | 1.27678 | 0.100431 | 11.72484 |

|                 |                                  |                                  |          |         |           |          |
|-----------------|----------------------------------|----------------------------------|----------|---------|-----------|----------|
| PAMDB0002<br>67 | Carboxylic acids and derivatives | Iminoaspartic acid               | 0.008628 | 1.20693 | 0.537915  | 0.074889 |
| PAMDB0001<br>87 | Carboxylic acids and derivatives | Pyrrolidonecarboxylic acid       | 0.014315 | 1.19781 | 0.602924  | 0.537683 |
| PAMDB0003<br>59 | Carboxylic acids and derivatives | Pyrroline hydroxycarboxylic acid | 0.014315 | 1.19781 | 0.602924  | 0.559079 |
| PAMDB0003<br>79 | Carboxylic acids and derivatives | Pantetheine 4'-phosphate         | 0.035834 | 1.15637 | 0.739801  | 9.584125 |
| PAMDB0036<br>06 | Carboxylic acids and derivatives | pantotheine 4'-phosphate         | 0.035834 | 1.15637 | 0.739801  | 9.584125 |
| PAMDB1000<br>20 | Carboxylic acids and derivatives | N-isopropyl-L-glutamine          | 9.88E-06 | 1.27551 | 0.0925752 | 15.70902 |
| PAMDB0036<br>43 | Diacylglycerols                  | DG(12:0/15:0/0:0)                | 4.1E-07  | 1.27735 | 0.0581857 | 6.651486 |
| PAMDB0036<br>59 | Diacylglycerols                  | DG(15:0/12:0/0:0)                | 4.1E-07  | 1.27735 | 0.0581857 | 6.651486 |
| PAMDB0001<br>35 | Fatty Acyls                      | 2-Isopropylmalic acid            | 2.83E-06 | 1.2767  | 0.11142   | 11.4809  |

|                 |                                 |                         |          |         |           |          |
|-----------------|---------------------------------|-------------------------|----------|---------|-----------|----------|
| PAMDB0006<br>41 | Fatty Acyls                     | 3-Isopropylmalate       | 2.83E-06 | 1.2767  | 0.11142   | 11.4809  |
| PAMDB0018<br>37 | Fatty Acyls                     | Palmitoleic acid        | 0.000325 | 1.26304 | 0.285528  | 1.099567 |
| PAMDB0009<br>88 | Fatty Acyls                     | D-Galactonate           | 0.004859 | 1.20642 | 0.510627  | 19.2813  |
| PAMDB0009<br>57 | Fatty Acyls                     | 7,8-Diaminononanoate    | 0.008497 | 1.18366 | 0.594083  | 0.66059  |
| PAMDB0065<br>52 | Glycerophosphoglycerophosphates | PGP(12:0(3-OH)/15:0)    | 1.75E-05 | 1.27516 | 0.0770524 | 5.595836 |
| PAMDB0065<br>86 | Glycerophosphoglycerophosphates | PGP(15:0/12:0(3-OH))    | 1.75E-05 | 1.27516 | 0.0770524 | 5.595836 |
| PAMDB0020<br>02 | Glycerophospholipids            | PE(12:0/19:1(12Z))      | 2.66E-09 | 1.27774 | 0.0714262 | 7.766574 |
| PAMDB0067<br>49 | Glycerophospholipids            | CDP-DG(10:0(3-OH)/12:0) | 5.82E-06 | 1.27625 | 0.0861194 | 7.037282 |
| PAMDB0067<br>57 | Glycerophospholipids            | CDP-DG(10:0/12:0(3-OH)) | 5.82E-06 | 1.27625 | 0.0861194 | 7.037282 |

|                 |                      |                           |          |         |           |          |
|-----------------|----------------------|---------------------------|----------|---------|-----------|----------|
| PAMDB0067<br>60 | Glycerophospholipids | CDP-DG(12:0(3-OH)/10:0)   | 5.82E-06 | 1.27625 | 0.0861194 | 7.037282 |
| PAMDB0067<br>71 | Glycerophospholipids | CDP-DG(12:0/10:0(3-OH))   | 5.82E-06 | 1.27625 | 0.0861194 | 7.037282 |
| PAMDB0039<br>35 | Glycerophospholipids | PS(10:0(3-OH)/17:0cycw7c) | 0.026957 | 1.15909 | 0.74802   | 2.08493  |
| PAMDB0039<br>50 | Glycerophospholipids | PS(12:0(3-OH)/15:0cyclo)  | 0.026957 | 1.15909 | 0.74802   | 2.08493  |
| PAMDB0039<br>84 | Glycerophospholipids | PS(15:0cyclo/12:0(3-OH))  | 0.026957 | 1.15909 | 0.74802   | 2.08493  |
| PAMDB0039<br>95 | Glycerophospholipids | PS(17:0cycw7c/10:0(3-OH)) | 0.026957 | 1.15909 | 0.74802   | 2.08493  |
| PAMDB0000<br>32 | Glycerophospholipids | Glycerophosphocholine     | 0.037794 | 1.1336  | 0.820864  | 13.57909 |
| PAMDB0067<br>10 | Glycerophospholipids | PS(14:0/15:0cyclo)        | 0.04157  | 1.13266 | 0.758625  | 0.120545 |
| PAMDB0067<br>14 | Glycerophospholipids | PS(15:0cyclo/14:0)        | 0.04157  | 1.13266 | 0.758625  | 0.120545 |



|                 |                                          |                                         |          |         |           |          |
|-----------------|------------------------------------------|-----------------------------------------|----------|---------|-----------|----------|
| PAMDB0067<br>27 | Glycerophospholipids                     | PS(17:0cycw7c/12:0)                     | 0.04157  | 1.13266 | 0.758625  | 0.120545 |
| PAMDB0067<br>46 | Glycerophospholipids                     | PS(19:0cycw8c/10:0)                     | 0.04157  | 1.13266 | 0.758625  | 0.120545 |
| BMDB02226       | Lipids and lipid-like molecules          | Adrenic acid                            | 2.71E-09 | 1.27773 | 0.0831744 | 7.293566 |
| BMDB62590       | Lipids and lipid-like molecules          | 5Z-hexadecenoic acid                    | 0.000325 | 1.26304 | 0.285528  | 1.099567 |
| BMDB12328       | Lipids and lipid-like molecules          | Palmitelaidic acid                      | 0.000325 | 1.26304 | 0.285528  | 1.099567 |
| BMDB12971       | Lipids and lipid-like molecules          | 1-Hexanol                               | 0.001821 | 1.23531 | 0.373137  | 0.295552 |
| BMDB00847       | Lipids and lipid-like molecules          | Pelargonic acid                         | 0.036856 | 1.1113  | 0.822183  | 21.24929 |
| BMDB62282       | Lipids and lipid-like molecules          | Pentyl butanoate                        | 0.036856 | 1.1113  | 0.822183  | 21.24929 |
| PAMDB0008<br>50 | Naphthalenes                             | (1R,2S)-Naphthalene 1,2-oxide           | 0.004458 | 1.22659 | 0.447207  | 17.56378 |
| PAMDB0063<br>08 | Not Available                            | N2-succinylglutamate                    | 0.007569 | 1.2022  | 0.529412  | 8.040167 |
| PAMDB0035<br>12 | Organic phosphoric acids and derivatives | 1-Deoxy-L-glycero-tetrolose 4-phosphate | 0.017373 | 1.15201 | 0.65812   | 22.97467 |
| PAMDB1000<br>92 | Organooxygen compounds                   | 2-aminobenzoylacetate                   | 0.004859 | 1.20642 | 0.510627  | 19.2813  |

|                 |                               |                                  |          |         |          |          |
|-----------------|-------------------------------|----------------------------------|----------|---------|----------|----------|
| PAMDB0035<br>27 | Prenol lipids                 | Geranyl diphosphate              | 0.002413 | 1.23904 | 0.37     | 0.316446 |
| PAMDB0002<br>51 | Prenol lipids                 | Octaprenyl diphosphate           | 0.002413 | 1.23904 | 0.37     | 0.316446 |
| PAMDB0005<br>09 | Purine nucleotides            | DIDP                             | 0.00217  | 1.23875 | 0.37844  | 21.88411 |
| PAMDB0004<br>03 | Pyrrolopyrimidines            | Queuine                          | 0.000714 | 1.2604  | 0.254861 | 0.847293 |
| PAMDB1000<br>77 | Signaling molecule            | N-Butanoyl-D-homoserine lactone  | 0.005801 | 1.22356 | 0.467017 | 14.65361 |
| PAMDB1000<br>73 | Signaling molecule            | 2-nonyl-4-hydroxyquinoline (NHQ) | 0.03253  | 1.15514 | 0.79634  | 0.200451 |
| PAMDB0054<br>78 | Tetralins                     | tRNA(Tyr)                        | 0.005888 | 1.22333 | 0.468036 | 15.49892 |
| PAMDB0001<br>51 | Tetrapyrroles and derivatives | Coproporphyrin III               | 0.00034  | 1.25966 | 0.256728 | 5.76322  |

**B**

| <i>Non-heat treated sample group -----Pseudomonas growth after 144 h 6 °C</i> |                                         |                                                      |                        |                           |                           |                             |
|-------------------------------------------------------------------------------|-----------------------------------------|------------------------------------------------------|------------------------|---------------------------|---------------------------|-----------------------------|
| <i>Database Code</i>                                                          | <i>Class</i>                            | <i>Compound Name</i>                                 | <i>p-value Volcano</i> | <i>VIP score (T6vsT1)</i> | <i>VIP Standard error</i> | <i>LOG2(FC)(T1PFvsT1CN)</i> |
| BMDB01890                                                                     | Amino acids, peptides, and analogues_T6 | Acetylcysteine                                       | 0.032862               | 1.23151                   | 0.419201                  | 1.9797                      |
| BMDB62559                                                                     | Amino acids, peptides, and analogues_T6 | Ile-Ile-Ile-Pro                                      | 0.018056               | 1.19352                   | 0.688296                  | 0.149989                    |
| BMDB62232                                                                     | Amino acids, peptides, and analogues_T6 | Glutaminyllysine                                     | 0.012877               | 1.17882                   | 0.607882                  | 6.379116                    |
| BMDB62572                                                                     | Amino acids, peptides, and analogues_T6 | Phe-Pro-Ile                                          | 0.029662               | 1.10502                   | 0.724945                  | 7.168326                    |
| BMDB62197                                                                     | Amino acids, peptides, and analogues_T6 | N-(2-Oxohexanoyl)homoserine lactone                  | 0.042278               | 1.06648                   | 0.833997                  | 0.040207                    |
| PAMDB001585                                                                   | Carboxylic acids and derivatives_T6     | 5,10-Methenyltetrahydrofolate                        | 0.010337               | 1.19848                   | 0.642769                  | 5.401918                    |
| PAMDB000094                                                                   | Diazines_T6                             | Orotic acid                                          | 0.02777                | 1.13715                   | 0.626357                  | 4.783832                    |
| PAMDB000968                                                                   | Fatty Acyls_T6                          | Benzoyl acetyl-CoA                                   | 3.38E-07               | 1.27725                   | 0.091134                  | 0.276173                    |
| PAMDB000536                                                                   | Fatty Acyls_T6                          | (S)-Hydroxyoctanoyl-CoA                              | 3.84E-07               | 1.27721                   | 0.092011                  | 0.276173                    |
| PAMDB001517                                                                   | Glycerolipids_T6                        | 1,2-Diacyl-sn-glycerol (ditetradec-7-enoyl, n-C14:1) | 0.007938               | 1.18716                   | 0.557108                  | 0.618484                    |
| PAMDB001676                                                                   | Glycerophosphoglycerophosphates_T6      | PGP(14:0/14:0)                                       | 6.73E-09               | 1.27771                   | 0.076302                  | 0.276173                    |
| PAMDB006594                                                                   | Glycerophosphoglycerophosphates_T6      | PGP(15:0cyclo/15:0cyclo)                             | 6.41E-09               | 1.27771                   | 0.07629                   | 0.276173                    |
| PAMDB006557                                                                   | Glycerophosphoglycerophosphates_T6      | PGP(12:0(3-OH)/18:1(9Z))                             | 1.2E-08                | 1.27768                   | 0.076512                  | 0.276173                    |

|                 |                                        |                            |          |         |          |          |
|-----------------|----------------------------------------|----------------------------|----------|---------|----------|----------|
| PAMDB00<br>6568 | Glycerophosphoglycerophosphates<br>_T6 | PGP(14:0(3-OH)/14:0(3-OH)) | 1.27E-08 | 1.27768 | 0.07684  | 0.276173 |
| PAMDB00<br>6573 | Glycerophosphoglycerophosphates<br>_T6 | PGP(14:0(3-OH)/16:1(9Z))   | 1.2E-08  | 1.27768 | 0.076512 | 0.276173 |
| PAMDB00<br>6609 | Glycerophosphoglycerophosphates<br>_T6 | PGP(16:1(9Z)/14:0(3-OH))   | 1.2E-08  | 1.27768 | 0.076512 | 0.276173 |
| PAMDB00<br>6625 | Glycerophosphoglycerophosphates<br>_T6 | PGP(18:1(9Z)/12:0(3-OH))   | 1.2E-08  | 1.27768 | 0.076512 | 0.276173 |
| PAMDB00<br>6539 | Glycerophosphoglycerophosphates<br>_T6 | PGP(10:0(3-OH)/18:1(9Z))   | 3.07E-08 | 1.27761 | 0.07822  | 0.276173 |
| PAMDB00<br>6555 | Glycerophosphoglycerophosphates<br>_T6 | PGP(12:0(3-OH)/16:1(9Z))   | 3.07E-08 | 1.27761 | 0.07822  | 0.276173 |
| PAMDB00<br>6608 | Glycerophosphoglycerophosphates<br>_T6 | PGP(16:1(9Z)/12:0(3-OH))   | 3.07E-08 | 1.27761 | 0.07822  | 0.276173 |
| PAMDB00<br>6624 | Glycerophosphoglycerophosphates<br>_T6 | PGP(18:1(9Z)/10:0(3-OH))   | 3.07E-08 | 1.27761 | 0.07822  | 0.276173 |
| PAMDB00<br>6545 | Glycerophosphoglycerophosphates<br>_T6 | PGP(10:0/19:iso)           | 3.63E-08 | 1.2776  | 0.074608 | 0.276173 |
| PAMDB00<br>6650 | Glycerophosphoglycerophosphates<br>_T6 | PGP(19:iso/10:0)           | 1.41E-05 | 1.2776  | 0.074608 | 0.276173 |
| PAMDB00<br>6409 | Glycerophosphoglycerophosphates<br>_T6 | PGP(16:1(9Z)/12:0)         | 4.01E-05 | 1.27719 | 0.081166 | 0.276173 |
| PAMDB00<br>6541 | Glycerophosphoglycerophosphates<br>_T6 | PGP(10:0(3-OH)/19:iso)     | 1.21E-05 | 1.27438 | 0.139491 | 0.276173 |
| PAMDB00<br>6570 | Glycerophosphoglycerophosphates<br>_T6 | PGP(14:0(3-OH)/15:0)       | 1.21E-05 | 1.27438 | 0.139491 | 0.276173 |
| PAMDB00<br>6649 | Glycerophosphoglycerophosphates<br>_T6 | PGP(19:iso/10:0(3-OH))     | 0.007343 | 1.27438 | 0.139491 | 0.276173 |
| PAMDB00<br>1677 | Glycerophosphoglycerophosphates<br>_T6 | PGP(14:1(7Z)/14:1(7Z))     | 0.003621 | 1.27083 | 0.168696 | 0.276173 |

|                 |                                        |                                                 |          |         |          |          |
|-----------------|----------------------------------------|-------------------------------------------------|----------|---------|----------|----------|
| PAMDB00<br>6538 | Glycerophosphoglycerophosphates<br>_T6 | PGP(10:0(3-OH)/17:0cycw7c)                      | 0.000047 | 1.27062 | 0.163213 | 0.276173 |
| PAMDB00<br>6553 | Glycerophosphoglycerophosphates<br>_T6 | PGP(12:0(3-OH)/15:0cyclo)                       | 0.000047 | 1.27062 | 0.163213 | 0.276173 |
| PAMDB00<br>6591 | Glycerophosphoglycerophosphates<br>_T6 | PGP(15:0cyclo/12:0(3-OH))                       | 0.000047 | 1.27062 | 0.163213 | 0.276173 |
| PAMDB00<br>6613 | Glycerophosphoglycerophosphates<br>_T6 | PGP(17:0cycw7c/10:0(3-OH))                      | 0.000047 | 1.27062 | 0.163213 | 0.276173 |
| PAMDB00<br>6610 | Glycerophosphoglycerophosphates<br>_T6 | PGP(16:1(9Z)/17:0cycw7c)                        | 0.00852  | 1.21644 | 0.573545 | 0.276173 |
| PAMDB00<br>6618 | Glycerophosphoglycerophosphates<br>_T6 | PGP(17:0cycw7c/16:1(9Z))                        | 0.00852  | 1.21644 | 0.573545 | 0.276173 |
| PAMDB00<br>6627 | Glycerophosphoglycerophosphates<br>_T6 | PGP(18:1(9Z)/15:0cyclo)                         | 0.00852  | 1.21644 | 0.573545 | 0.276173 |
| PAMDB00<br>6955 | Glycerophospholipids _T6               | CL(10:0(3-OH)/12:0/10:0(3-OH)/12:0)             | 3.38E-09 | 1.27773 | 0.075253 | 0.276173 |
| PAMDB00<br>6964 | Glycerophospholipids _T6               | CL(10:0/12:0(3-OH)/10:0/12:0(3-OH))             | 3.38E-09 | 1.27773 | 0.075253 | 0.276173 |
| PAMDB00<br>6967 | Glycerophospholipids _T6               | CL(12:0(3-OH)/10:0/12:0(3-OH)/10:0)             | 3.38E-09 | 1.27773 | 0.075253 | 0.276173 |
| PAMDB00<br>6979 | Glycerophospholipids _T6               | CL(12:0/10:0(3-OH)/12:0/10:0(3-OH))             | 3.38E-09 | 1.27773 | 0.075253 | 0.276173 |
| PAMDB00<br>6954 | Glycerophospholipids _T6               | CL(10:0(3-OH)/12:0(3-OH)/10:0(3-OH)/12:0(3-OH)) | 6.33E-09 | 1.27771 | 0.075454 | 0.276173 |
| PAMDB00<br>6966 | Glycerophospholipids _T6               | CL(12:0(3-OH)/10:0(3-OH)/12:0(3-OH)/10:0(3-OH)) | 6.33E-09 | 1.27771 | 0.075454 | 0.276173 |
| PAMDB00<br>3954 | Glycerophospholipids _T6               | PS(12:0(3-OH)/18:1(9Z))                         | 3.1E-08  | 1.27761 | 0.074397 | 0.276173 |
| PAMDB00<br>3970 | Glycerophospholipids _T6               | PS(14:0(3-OH)/16:1(9Z))                         | 3.1E-08  | 1.27761 | 0.074397 | 0.276173 |

|                 |                          |                                     |          |         |          |          |
|-----------------|--------------------------|-------------------------------------|----------|---------|----------|----------|
| PAMDB00<br>3993 | Glycerophospholipids _T6 | PS(16:1(9Z)/14:0(3-OH))             | 3.1E-08  | 1.27761 | 0.074397 | 0.276173 |
| PAMDB00<br>4000 | Glycerophospholipids _T6 | PS(18:1(9Z)/12:0(3-OH))             | 3.1E-08  | 1.27761 | 0.074397 | 0.276173 |
| PAMDB00<br>2026 | Glycerophospholipids _T6 | PE(19:0cycw8c/12:0)                 | 8.48E-08 | 1.27747 | 0.079929 | 0.276173 |
| PAMDB00<br>6675 | Glycerophospholipids _T6 | PE(16:0/19:0cycv8c)                 | 1.43E-07 | 1.27742 | 0.080868 | 0.276173 |
| PAMDB00<br>3898 | Glycerophospholipids _T6 | PE(16:1(9Z)/19:iso)                 | 1.43E-07 | 1.27742 | 0.080868 | 0.276173 |
| PAMDB00<br>2020 | Glycerophospholipids _T6 | PE(18:0/17:0cycw7c)                 | 1.43E-07 | 1.27742 | 0.080868 | 0.276173 |
| PAMDB00<br>1474 | Glycerophospholipids _T6 | PE(18:1(11Z)/17:0)                  | 1.43E-07 | 1.27742 | 0.080868 | 0.276173 |
| PAMDB00<br>6695 | Glycerophospholipids _T6 | PE(19:0cycv8c/16:0)                 | 1.43E-07 | 1.27742 | 0.080868 | 0.276173 |
| PAMDB00<br>3920 | Glycerophospholipids _T6 | PE(19:iso/16:1(9Z))                 | 1.43E-07 | 1.27742 | 0.080868 | 0.276173 |
| PAMDB00<br>6853 | Glycerophospholipids _T6 | CDP-DG(19:iso/19:0cycv8c)           | 4.66E-07 | 1.27711 | 0.083882 | 0.276173 |
| PAMDB00<br>6953 | Glycerophospholipids _T6 | CL(10:0(3-OH)/10:0/10:0(3-OH)/10:0) | 4.66E-07 | 1.27711 | 0.083882 | 0.276173 |
| PAMDB00<br>6963 | Glycerophospholipids _T6 | CL(10:0/10:0(3-OH)/10:0/10:0(3-OH)) | 4.66E-07 | 1.27711 | 0.083882 | 0.276173 |
| PAMDB00<br>1500 | Glycerophospholipids _T6 | PG(16:0/19:0)                       | 4.16E-07 | 1.27709 | 0.084081 | 0.276173 |
| PAMDB00<br>4086 | Glycerophospholipids _T6 | PG(16:0/19:iso)                     | 4.16E-07 | 1.27709 | 0.084081 | 0.276173 |
| PAMDB00<br>1448 | Glycerophospholipids _T6 | PG(19:0/16:0)                       | 4.16E-07 | 1.27709 | 0.084081 | 0.276173 |

|                 |                          |                         |          |         |          |          |
|-----------------|--------------------------|-------------------------|----------|---------|----------|----------|
| PAMDB00<br>4111 | Glycerophospholipids _T6 | PG(19:iso/16:0)         | 4.16E-07 | 1.27709 | 0.084081 | 0.276173 |
| PAMDB00<br>0798 | Glycerophospholipids _T6 | PG(18:1(11Z)/16:1(9Z))  | 4.52E-07 | 1.27706 | 0.084458 | 0.276173 |
| PAMDB00<br>6501 | Glycerophospholipids _T6 | PG(16:0/19:1(9Z))       | 6.04E-06 | 1.27516 | 0.113525 | 0.276173 |
| PAMDB00<br>1491 | Glycerophospholipids _T6 | PG(16:1(9Z)/19:0)       | 6.04E-06 | 1.27516 | 0.113525 | 0.276173 |
| PAMDB00<br>4090 | Glycerophospholipids _T6 | PG(16:1(9Z)/19:iso)     | 6.04E-06 | 1.27516 | 0.113525 | 0.276173 |
| PAMDB00<br>1485 | Glycerophospholipids _T6 | PG(17:0/18:1(11Z))      | 6.04E-06 | 1.27516 | 0.113525 | 0.276173 |
| PAMDB00<br>1483 | Glycerophospholipids _T6 | PG(18:1(11Z)/17:0)      | 6.04E-06 | 1.27516 | 0.113525 | 0.276173 |
| PAMDB00<br>1488 | Glycerophospholipids _T6 | PG(19:0/16:1(9Z))       | 6.04E-06 | 1.27516 | 0.113525 | 0.276173 |
| PAMDB00<br>6517 | Glycerophospholipids _T6 | PG(19:0cycv8c/16:0)     | 6.04E-06 | 1.27516 | 0.113525 | 0.276173 |
| PAMDB00<br>6525 | Glycerophospholipids _T6 | PG(19:1(9Z)/16:0)       | 6.04E-06 | 1.27516 | 0.113525 | 0.276173 |
| PAMDB00<br>4112 | Glycerophospholipids _T6 | PG(19:iso/16:1(9Z))     | 6.04E-06 | 1.27516 | 0.113525 | 0.276173 |
| PAMDB00<br>3934 | Glycerophospholipids _T6 | PS(10:0(3-OH)/16:1(9Z)) | 3.19E-05 | 1.27378 | 0.202015 | 18.07214 |
| PAMDB00<br>3991 | Glycerophospholipids _T6 | PS(16:1(9Z)/10:0(3-OH)) | 3.19E-05 | 1.27378 | 0.202015 | 18.07214 |
| PAMDB00<br>4102 | Glycerophospholipids _T6 | PG(19:0cycv8c/19:iso)   | 0.00005  | 1.27083 | 0.180677 | 0.276173 |
| PAMDB00<br>4115 | Glycerophospholipids _T6 | PG(19:iso/19:0cycv8c)   | 0.00005  | 1.27083 | 0.180677 | 0.276173 |



|                 |                          |                                        |          |         |          |          |
|-----------------|--------------------------|----------------------------------------|----------|---------|----------|----------|
| PAMDB00<br>3948 | Glycerophospholipids _T6 | PS(12:0(3-OH)/14:0(3-OH))              | 0.000573 | 1.2599  | 0.334872 | 0.276173 |
| PAMDB00<br>3964 | Glycerophospholipids _T6 | PS(14:0(3-OH)/12:0(3-OH))              | 0.000573 | 1.2599  | 0.334872 | 0.276173 |
| PAMDB00<br>1572 | Glycerophospholipids _T6 | 2-octadecanoyl-sn-glycerol 3-phosphate | 0.000569 | 1.25989 | 0.282614 | 14.85499 |
| PAMDB00<br>6218 | Glycerophospholipids _T6 | LPA(18:0/0:0)                          | 0.000569 | 1.25989 | 0.282614 | 14.85499 |
| PAMDB00<br>3860 | Glycerophospholipids _T6 | PE(12:0(3-OH)/19:iso)                  | 0.00042  | 1.25974 | 0.308052 | 0.114885 |
| PAMDB00<br>3914 | Glycerophospholipids _T6 | PE(19:iso/12:0(3-OH))                  | 0.00042  | 1.25974 | 0.308052 | 0.114885 |
| PAMDB00<br>6365 | Glycerophospholipids _T6 | sn-glycero-3-phosphocholine            | 0.001227 | 1.25535 | 0.406735 | 12.19687 |
| PAMDB00<br>3745 | Glycerophospholipids _T6 | CDP-DG(15:0/19:1(9Z))                  | 0.001275 | 1.25312 | 0.406637 | 0.019423 |
| PAMDB00<br>0711 | Glycerophospholipids _T6 | CDP-DG(16:0/18:1(9Z))                  | 0.001275 | 1.25312 | 0.406637 | 0.019423 |
| PAMDB00<br>3757 | Glycerophospholipids _T6 | CDP-DG(16:1(9Z)/18:0)                  | 0.001275 | 1.25312 | 0.406637 | 0.019423 |
| PAMDB00<br>3764 | Glycerophospholipids _T6 | CDP-DG(18:0/16:1(9Z))                  | 0.001275 | 1.25312 | 0.406637 | 0.019423 |
| PAMDB00<br>0726 | Glycerophospholipids _T6 | CDP-DG(18:1(11Z)/16:0)                 | 0.001275 | 1.25312 | 0.406637 | 0.019423 |
| PAMDB00<br>0735 | Glycerophospholipids _T6 | CDP-DG(18:1(9Z)/16:0)                  | 0.001275 | 1.25312 | 0.406637 | 0.019423 |
| PAMDB00<br>3776 | Glycerophospholipids _T6 | CDP-DG(19:1(9Z)/15:0)                  | 0.001275 | 1.25312 | 0.406637 | 0.019423 |
| PAMDB00<br>6805 | Glycerophospholipids _T6 | CDP-DG(16:0/19:0cycw8c)                | 0.001495 | 1.25245 | 0.416628 | 0.276173 |

|                 |                          |                           |          |         |          |          |
|-----------------|--------------------------|---------------------------|----------|---------|----------|----------|
| PAMDB00<br>3751 | Glycerophospholipids _T6 | CDP-DG(16:0/19:1(9Z))     | 0.001495 | 1.25245 | 0.416628 | 0.276173 |
| PAMDB00<br>6809 | Glycerophospholipids _T6 | CDP-DG(16:1(9Z)/19:0)     | 0.001495 | 1.25245 | 0.416628 | 0.276173 |
| PAMDB00<br>6827 | Glycerophospholipids _T6 | CDP-DG(18:1(11Z)/17:0)    | 0.001495 | 1.25245 | 0.416628 | 0.276173 |
| PAMDB00<br>6834 | Glycerophospholipids _T6 | CDP-DG(19:0/16:1(9Z))     | 0.001495 | 1.25245 | 0.416628 | 0.276173 |
| PAMDB00<br>6840 | Glycerophospholipids _T6 | CDP-DG(19:0cycv8c/16:0)   | 0.001495 | 1.25245 | 0.416628 | 0.276173 |
| PAMDB00<br>3777 | Glycerophospholipids _T6 | CDP-DG(19:1(9Z)/16:0)     | 0.001495 | 1.25245 | 0.416628 | 0.276173 |
| PAMDB00<br>4050 | Glycerophospholipids _T6 | PG(12:0(3-OH)/18:1(9Z))   | 0.001725 | 1.24974 | 0.417768 | 7.727007 |
| PAMDB00<br>4066 | Glycerophospholipids _T6 | PG(14:0(3-OH)/16:1(9Z))   | 0.001725 | 1.24974 | 0.417768 | 7.727007 |
| PAMDB00<br>4089 | Glycerophospholipids _T6 | PG(16:1(9Z)/14:0(3-OH))   | 0.001725 | 1.24974 | 0.417768 | 7.727007 |
| PAMDB00<br>4096 | Glycerophospholipids _T6 | PG(18:1(9Z)/12:0(3-OH))   | 0.001725 | 1.24974 | 0.417768 | 7.727007 |
| PAMDB00<br>3966 | Glycerophospholipids _T6 | PS(14:0(3-OH)/14:0(3-OH)) | 0.009303 | 1.21365 | 0.596249 | 5.351209 |
| PAMDB00<br>3951 | Glycerophospholipids _T6 | PS(12:0(3-OH)/16:0)       | 0.006808 | 1.1907  | 0.519693 | 1.665435 |
| PAMDB00<br>3965 | Glycerophospholipids _T6 | PS(14:0(3-OH)/14:0)       | 0.006808 | 1.1907  | 0.519693 | 1.665435 |
| PAMDB00<br>3977 | Glycerophospholipids _T6 | PS(14:0/14:0(3-OH))       | 0.006808 | 1.1907  | 0.519693 | 1.665435 |
| PAMDB00<br>3988 | Glycerophospholipids _T6 | PS(16:0/12:0(3-OH))       | 0.006808 | 1.1907  | 0.519693 | 1.665435 |

|                 |                                                      |                                                                                                 |          |         |          |          |
|-----------------|------------------------------------------------------|-------------------------------------------------------------------------------------------------|----------|---------|----------|----------|
| PAMDB00<br>3870 | Glycerophospholipids _T6                             | PE(14:0(3-OH)/14:0(3-OH))                                                                       | 0.016662 | 1.15771 | 0.683334 | 0.025551 |
| PAMDB00<br>6379 | Glycerophospholipids _T6                             | PG(10:0/10:0)                                                                                   | 0.038197 | 1.15654 | 0.621711 | 0.276173 |
| PAMDB00<br>1983 | Glycerophospholipids _T6                             | PE(10:0/12:0)                                                                                   | 0.016891 | 1.14799 | 0.656985 | 0.069496 |
| PAMDB00<br>1993 | Glycerophospholipids _T6                             | PE(12:0/10:0)                                                                                   | 0.016891 | 1.14799 | 0.656985 | 0.069496 |
| PAMDB00<br>4034 | Glycerophospholipids _T6                             | PG(10:0(3-OH)/19:iso)                                                                           | 0.024397 | 1.13334 | 0.78275  | 13.72789 |
| PAMDB00<br>4063 | Glycerophospholipids _T6                             | PG(14:0(3-OH)/15:0)                                                                             | 0.024397 | 1.13334 | 0.78275  | 13.72789 |
| PAMDB00<br>4077 | Glycerophospholipids _T6                             | PG(15:0/14:0(3-OH))                                                                             | 0.024397 | 1.13334 | 0.78275  | 13.72789 |
| PAMDB00<br>4104 | Glycerophospholipids _T6                             | PG(19:iso/10:0(3-OH))                                                                           | 0.024397 | 1.13334 | 0.78275  | 13.72789 |
| PAMDB00<br>3585 | Imidazole ribonucleosides and<br>ribonucleotides _T6 | 1-(5-phosphoribosyl)-5-((5-<br>phosphoribosylamino)methylideneamino)imidazole<br>-4-carboxamide | 2.34E-08 | 1.27765 | 0.07855  | 0.276173 |
| PAMDB00<br>1692 | Organic phosphoric acids and<br>derivatives _T6      | Tetradecanoyl-phosphate (n-C14:0)                                                               | 0.045303 | 1.08899 | 0.844302 | 5.852115 |
| PAMDB00<br>1054 | Prenol lipids _T6                                    | Undecaprenyl phosphate                                                                          | 1.35E-06 | 1.27659 | 0.098523 | 0.276173 |
| PAMDB00<br>1971 | Prenol lipids _T6                                    | Ubiquinol-4                                                                                     | 5.74E-05 | 1.27002 | 0.175978 | 0.276173 |
| PAMDB00<br>1300 | Pyrimidine nucleotides _T6                           | UDP-N-Acetylmuramyl-L-Ala                                                                       | 7.01E-09 | 1.27771 | 0.076441 | 0.276173 |

C

| Heat treated sample group -----Pseudomonas growth after 24 h 6 °C |                                    |                |                 |                    |                    |                      |
|-------------------------------------------------------------------|------------------------------------|----------------|-----------------|--------------------|--------------------|----------------------|
| Database Code                                                     | Class                              | Compound Name  | p-value Volcano | VIP score (T6vsT1) | VIP Standard error | LOG2(FC)(T1PFvsT1CN) |
| PAMDB006398                                                       | Glycerophosphoglycerophosphates_T1 | PGP(10:0/10:0) | 0.021678        | 1.25838            | 0.635046           | 5.1064               |

# D

| <i>Heat treated sample group -----Pseudomonas growth after 24 h 6 °C</i> |                                         |                               |                        |                           |                           |                             |
|--------------------------------------------------------------------------|-----------------------------------------|-------------------------------|------------------------|---------------------------|---------------------------|-----------------------------|
| <i>Database Code</i>                                                     | <i>Class</i>                            | <i>Compound Name</i>          | <i>p-value Volcano</i> | <i>VIP score (T6vsT1)</i> | <i>VIP Standard error</i> | <i>LOG2(FC)(T6PFvsT6CN)</i> |
| PAMDB006650                                                              | Glycerophosphoglycerophosphates_T6      | PGP(19:iso/10:0)              | 0.021678               | 1.30776                   | 0.345948                  | 10.151                      |
| PAMDB006545                                                              | Glycerophosphoglycerophosphates_T6      | PGP(10:0/19:iso)              | 0.021678               | 1.30776                   | 0.345948                  | 10.151                      |
| BMDB11175                                                                | Amino acids, peptides, and analogues_T6 | L-leucyl-L-proline            | 0.021678               | 1.31501                   | 0.319884                  | 9.7346                      |
| BMDB62574                                                                | Amino acids, peptides, and analogues_T6 | Pro-Ile                       | 0.021678               | 1.31501                   | 0.319884                  | 9.7346                      |
| PAMDB001600                                                              | Glycerophospholipids_T6                 | CDP-12-Dioctadecanoylglycerol | 0.03727                | 1.28676                   | 0.316725                  | 11.046                      |
| PAMDB000736                                                              | Glycerophospholipids_T6                 | CDP-DG(18:1(9Z)/18:0)         | 0.03727                | 1.28676                   | 0.316725                  | 11.046                      |
| PAMDB000727                                                              | Glycerophospholipids_T6                 | CDP-DG(18:1(11Z)/18:0)        | 0.03727                | 1.28676                   | 0.316725                  | 11.046                      |
| PAMDB006852                                                              | Glycerophospholipids_T6                 | CDP-DG(19:iso/17:0cycw7c)     | 0.03727                | 1.28676                   | 0.316725                  | 11.046                      |
| PAMDB000720                                                              | Glycerophospholipids_T6                 | CDP-DG(18:0/18:1(9Z))         | 0.03727                | 1.28676                   | 0.316725                  | 11.046                      |
| PAMDB006824                                                              | Glycerophospholipids_T6                 | CDP-DG(17:0cycw7c/19:iso)     | 0.03727                | 1.28676                   | 0.316725                  | 11.046                      |
