# Supplementary material for: A Milk Foodomics Investigation into the Effect of Pseudomonas fluorescens Growth under Cold Chain Conditions
Source: Foods. 2021 May 24;10(6):1173. doi: 10.3390/foods10061173 (PMC8225104; doi:10.3390/foods10061173)
Supplement: Supplementary file 1 [file foods-10-01173-s001.zip]

Archive with 4 entries (4 files):
- Bellassi et al S1 Dataset of annotated compound.xlsx
- Bellassi et al S2 Hotelling's T2, permutation, and CV ANOVA.pdf
- Bellassi et al S3 Potential biomarker compounds.pdf
- Bellassi et al S4 Peptide Dataset.xlsx
