# Supplementary material for: A Milk Foodomics Investigation into the Effect of Pseudomonas fluorescens Growth under Cold Chain Conditions
Source: Foods. 2021 May 24;10(6):1173. doi: 10.3390/foods10061173 (PMC8225104; doi:10.3390/foods10061173)
Supplement: Supplementary file 1 [file foods-10-01173-s001.zip › Bellassi et al S1 Dataset of annotated compound.xlsx]

## Sheet: Dichloromethane_no-heat
Compound	T1CN_rep1	T1CN_rep2	T1CN_rep3	T1PF_rep1	T1PF_rep2	T1PF_rep3	T6CN_rep1	T6CN_rep2	T6CN_rep3	T6PF_rep1	T6PF_rep2	T6PF_rep3	Alignment Value	Annotations	CAS Number	ChEBI ID	CompositeSpectrum
PGP(15:0/19:iso)-PAMDB006589	0.160475	0.138462	0.198771	-16.5747	-16.8484	-16.5604	0.245966	-16.6607	-0.138462	1.61568	-15.9645	0.660089	PGP(15:0/19:iso)-PAMDB006589	PGP(15:0/19:iso)-PAMDB006589 [ C40 H80 O13 P2, tgt=15.77, overall=15.77 ]			(854.4847, 8513.453)(855.48724, 2391.1914)
Pyrrolidonecarboxylicacid-PAMDB000187	-0.126179	17.4931	-0.454918	0.0363293	-0.23731	0.0506668	-0.115299	-0.049612	-0.0363274	0.794844	0.646587	0.763556	Pyrrolidonecarboxylicacid-PAMDB000187	Pyrrolidonecarboxylicacid-PAMDB000187 [ C5H7NO3, tgt= ]			(130.0467, 8260.61)(132.074, 330922.7)(133.0768, 9879.41)
PS(18:0/10:0)-PAMDB006449	0.903001	0.347692	-0.571225	-0.0174932	-0.193004	0.0174932	-0.343833	-0.43706	-0.666453	0.236081	0.511716	0.813474	PS(18:0/10:0)-PAMDB006449	PS(18:0/10:0)-PAMDB006449 [ C34 H66 N O10 P, tgt=90.31, overall=90.31 ]			(680.4656, 26378.855)(681.4682, 7607.76)(661.4243, 1119.4401)(662.4267, 656.58)(663.4431, 1461680.5)(664.4467, 650247.9)(665.4494, 132941.98)(666.4509, 12079.339)(699.5014, 2350.34)(680.4675, 20213.959)(681.4701, 6779.0703)(685.4231, 52858.996)(686.42584, 18492.771)(687.4276, 2256.47)
AlphaBiliverdin-PAMDB100082	-0.905378	19.1531	-1.23412	-0.74287	19.0565	19.2024	19.4833	-0.828812	19.2545	0.0156441	-0.132612	-0.0156441	AlphaBiliverdin-PAMDB100082	AlphaBiliverdin-PAMDB100082 [ C33 H34 N4 O6, tgt=12.04, overall=12.04 ]			(582.2345, 25701.658)(583.2362, 621.97797)
DG(14:0/19:1(9Z)/0:0)-PAMDB003657	0.43595	1.50626	0.0709658	1.31169	-0.0709658	-0.584905	0.977351	-0.30107	0.984223	-20.3269	-20.4752	-2.3566	DG(14:0/19:1(9Z)/0:0)-PAMDB003657	DG(14:0/19:1(9Z)/0:0)-PAMDB003657 [ C36 H68 O5, tgt=54.87, overall=54.87 ]			(563.49097, 3828.8657)(565.5071, 10906.234)(566.5089, 3305.92)(604.51636, 2258.4668)(564.5221, 1957.71)(582.5135, 4578.38)(587.9288, 39369.79)(587.4952, 15057.898)(588.49677, 1683.4349)(580.5247, 7599.29)
Octadecanoyl-phosphate(n-C18:0)-PAMDB001666	-9.80329	10.3746	10.1727	-9.64078	10.2928	10.2215	-9.79241	9.31269	-9.71344	-8.88227	-9.03052	8.88227	Octadecanoyl-phosphate(n-C18:0)-PAMDB001666	Octadecanoyl-phosphate(n-C18:0)-PAMDB001666 [ C18H35O5P, tgt= ]			(347.2167, 164.88)(348.7201, 167.565)(384.25586, 2655.045)(367.2373, 9413.899)(368.2416, 892.19)(369.19897, 2005.9049)
PS(15:0cyclo/14:0(3-OH))-PAMDB003985	0.446651	0.0849552	0.0247421	-0.2211	-0.0247421	-0.42104	0.941576	-0.623127	0.687801	2.06125	-17.1213	-17.0044	PS(15:0cyclo/14:0(3-OH))-PAMDB003985	PS(15:0cyclo/14:0(3-OH))-PAMDB003985 [ C35 H64 N O11 P, tgt=55.17, overall=55.17 ]			(688.41785, 16205.315)(689.4205, 4153.374)
PS(16:0/16:1(9Z))-PAMDB000845	11.6706	12.3275	-9.73415	11.7747	11.8806	9.29996	-9.39453	-9.32884	-9.31556	-8.48439	-8.63265	8.48439	PS(16:0/16:1(9Z))-PAMDB000845	PS(16:0/16:1(9Z))-PAMDB000845 [ C38 H72 N O10 P, tgt=18.40, overall=18.40 ]			(738.4876, 1356.9)(740.5058, 169.37)(717.844, 17039.756)(718.84595, 5077.658)(718.5132, 167.02)(733.52576, 3587.01)
Nicotinicacid-PAMDB000399	0.131455	0.0201445	-0.352696	-0.0201445	-0.485587	0.16002	0.201335	0.102498	0.129136	-2.46554	-1.07766	-2.2273	Nicotinicacid-PAMDB000399	Nicotinicacid-PAMDB000399 [ C6 H5 N O2, tgt=65.11, overall=65.11 ]			(124.03971, 13893.8955)(125.0403, 862.67)(111.041664, 1736.7635)(123.35417, 223137.84)(147.0213, 10925.055)(129.01553, 8856.898)
S-Lactoylglutathione-PAMDB000239	0.264188	-0.13243	-0.0997763	-0.271321	-0.844283	0.145385	-0.253152	0.0294523	0.0316191	0.189609	0.47754	-0.0294523	S-Lactoylglutathione-PAMDB000239	S-Lactoylglutathione-PAMDB000239 [ C13 H21 N3 O8 S, tgt=59.93, overall=59.93 ]			(365.09924, 821573.5)(366.1022, 91113.53)(367.10306, 13065.034)(368.10535, 573.395)(384.14166, 875.52496)(384.07507, 20161.297)(385.07568, 2557.4082)
Palmitelaidic acid_BMDB12328	0.834272	-1.11904	0.522583	1.21881	1.0096	1.30811	-0.615374	-0.395277	-0.627205	-0.0630321	0.0630321	-0.140188	Palmitelaidic acid_BMDB12328	Palmitelaidic acid_BMDB12328 [ C16 H30 O2, tgt=71.54, overall=71.54 ]			(277.2119, 710736.44)(278.21484, 117515.305)(279.22162, 10447.88)(237.2165, 2614.724)(255.22687, 1764.4333)(259.2009, 36437.95)(260.20374, 3981.9187)(261.2147, 255.45)
PE(12:0/19:0cycw8c)-PAMDB002003	-0.483542	-0.801514	-0.441837	0.0284328	-0.260174	-0.0619488	0.428246	0.276957	0.523794	0.728914	-0.0284328	0.213163	PE(12:0/19:0cycw8c)-PAMDB002003	PE(12:0/19:0cycw8c)-PAMDB002003 [ C36 H70 N O8 P, tgt=68.87, overall=68.87 ]			(676.4862, 20623.46)(677.4929, 6930.526)(678.4941, 3824.8767)(658.4963, 9718.027)(699.5246, 1366.3)(675.50616, 43419.336)(676.51013, 13335.505)(680.46783, 15523.678)(681.4703, 5109.992)
o-aminoacetophenone-PAMDB100041	-0.126179	16.3926	-0.454918	0.0363293	-0.23731	0.0506668	-0.115299	-0.049612	-0.0363274	0.794844	0.646587	0.763556	o-aminoacetophenone-PAMDB100041	o-aminoacetophenone-PAMDB100041 [ C8 H9 N O, tgt= ]			(136.0721, 8597.53)(158.1142, 113508.34)(144.0622, 3018.05)
PE(17:0cycw7c/12:0(3-OH))-PAMDB003900	0.96989	0.408732	-0.503484	-7.5462	-0.108088	0.108088	-0.254962	-0.34072	-0.568408	0.344041	0.620467	0.91237	PE(17:0cycw7c/12:0(3-OH))-PAMDB003900	PE(17:0cycw7c/12:0(3-OH))-PAMDB003900 [ C34 H66 N O9 P, tgt=65.65, overall=65.65 ]			(663.4424, 1465290.9)(664.44653, 713105.25)(665.4493, 148740.23)(666.45087, 13995.807)(647.4452, 1678.61)(648.4483, 372.98)(647.4541, 16276.085)(648.4485, 11527.98)(681.47015, 7294.726)(686.42596, 18924.63)(687.42773, 2514.4688)
11-Dodecenoic acid_BMDB62049	0.343296	0.000841141	-0.352293	0.253181	-0.000841141	0.231913	-19.8556	0.0200691	-0.825775	-18.9455	0.0616283	-18.9768	11-Dodecenoic acid_BMDB62049	11-Dodecenoic acid_BMDB62049 [ C12 H22 O2, tgt=72.14, overall=72.14 ]			(181.15485, 2011.0555)(184.1659, 16060.375)(219.2071, 256071.89)(220.21002, 31575.521)(221.2124, 247.04001)(198.18134, 20588.549)(199.18414, 281.03668)
PS(10:0(3-OH)/18:1(9Z))-PAMDB003936	0.459727	0.405828	-0.129275	-0.00370121	0.00370121	-0.162919	1.26707	-0.142058	1.36305	2.24987	-16.2183	-16.1013	PS(10:0(3-OH)/18:1(9Z))-PAMDB003936	PS(10:0(3-OH)/18:1(9Z))-PAMDB003936 [ C34 H62 N O11 P, tgt=36.78, overall=36.78 ]			(695.28815, 5626.224)(696.8524, 8488.441)(697.41003, 3071.434)(675.4079, 8559.44)(676.4106, 1231.4)(678.3973, 35071.055)(679.39984, 9440.193)(680.4018, 411.28)(718.3871, 2172.2834)
&beta--D-glucose6-phosphate-PAMDB006323	-0.831249	18.568	17.8579	-0.668741	-0.942381	-0.654404	-0.82037	17.3699	17.7674	0.0897732	-0.0584831	0.058485	&beta--D-glucose6-phosphate-PAMDB006323	&beta--D-glucose6-phosphate-PAMDB006323 [ C6 H13 O9 P, tgt=48.78, overall=48.78 ]			(261.03217, 2155.51)(260.04822, 28408.873)(261.54883, 695.8)(262.0468, 497.13)(283.01324, 1107.245)
Ethylphosphonate-PAMDB001161	-0.652438	-1.01128	-0.65417	-1.15004	-1.76156	0.158748	-0.158748	0.770791	0.824473	1.21628	0.810828	1.93278	Ethylphosphonate-PAMDB001161	Ethylphosphonate-PAMDB001161 [ C2 H6 O3 P, tgt=17.58, overall=17.58 ]			(111.0158, 802.24)(127.03616, 16927.525)(109.02591, 8038.6978)
PG(16:0/14:0)-PAMDB001479	-19.4875	-0.561397	-0.0882654	0.74089	-0.0494146	0.0494146	0.600152	0.393567	0.957051	1.67849	-18.7147	-18.5977	PG(16:0/14:0)-PAMDB001479	PG(16:0/14:0)-PAMDB001479 [ C36H71O10P, tgt= ]			(676.48724, 19906.322)(677.502, 7255.487)(680.15027, 17750.867)(680.14154, 7337.4106)(718.5235, 9975.59)(722.49005, 20139.45)(723.4927, 5447.71)
PS(12:0(3-OH)/16:0)-PAMDB003951	-1.33434	-1.77509	-2.12159	-0.164362	0.0563793	-0.126736	1.00172	-0.0563793	1.12494	1.86458	0.899292	1.42838	PS(12:0(3-OH)/16:0)-PAMDB003951	PS(12:0(3-OH)/16:0)-PAMDB003951 [ C34 H64 N O11 P, tgt=55.18, overall=55.18 ]			(675.40894, 8799.613)(676.4118, 1155.71)(696.4681, 680.57)(699.39417, 54369.95)(700.39655, 14441.943)(701.39886, 2146.505)
D-Galactose-PAMDB000054	-0.00323677	2.45831	1.18019	0.200661	-19.6332	-0.349163	-1.30865	-0.313826	0.00323677	-0.229916	2.15466	0.133585	D-Galactose-PAMDB000054	D-Galactose-PAMDB000054 [ C6 H12 O6, tgt=53.01, overall=53.01 ]			(180.15381, 46548.36)(181.26663, 4698.748)(185.0746, 18681.15)(162.0514, 4337.51)(183.0983, 772.99)(208.06924, 4089.6802)
PE(14:0/14:0(3-OH))-PAMDB003881	0.654247	-0.444405	-0.13797	0.682629	-0.0636597	0.0636597	-0.461355	-0.403307	-0.682459	0.333439	0.138075	0.457472	PE(14:0/14:0(3-OH))-PAMDB003881	PE(14:0/14:0(3-OH))-PAMDB003881 [ C33 H66 N O9 P, tgt=65.01, overall=65.01 ]			(658.4636, 594.25)(634.4405, 34261.16)(635.4431, 8722.946)(636.4497, 394.28)(654.4809, 1065.245)(678.13055, 16606.67)(679.26843, 11362.755)(679.468, 9031.49)
PE(16:0/17:0cycw7c)-PAMDB002012	0.739263	0.121028	0.126719	1.85193	-0.121028	-0.160155	-2.01349	-1.6871	-0.156909	-0.763692	0.497434	0.320834	PE(16:0/17:0cycw7c)-PAMDB002012	PE(16:0/17:0cycw7c)-PAMDB002012 [ C38 H74 N O8 P, tgt=78.91, overall=78.91 ]			(705.4061, 8891.826)(705.5334, 2825.9402)(685.52344, 1914.39)(686.5255, 1397.51)(706.5249, 5771.09)(689.5399, 4768.19)(703.5377, 52381.414)(704.5398, 16941.92)(708.49927, 121000.734)(709.50195, 47148.008)(710.504, 7441.666)
12-Methyltridecanoic acid_BMDB62048	0.0584621	-0.0584621	-0.418007	-2.25423	6.87227	0.167105	6.21132	-0.304983	6.23792	7.35167	-1.29484	-0.52639	12-Methyltridecanoic acid_BMDB62048	12-Methyltridecanoic acid_BMDB62048 [ C14 H28 O2, tgt=70.74, overall=70.74 ]			(233.2212, 1813.05)(214.2128, 470821.16)(215.2155, 43265.24)(228.22923, 1.0210576E7)(229.23203, 1797620.2)(230.23459, 122925.42)(251.44818, 96807.66)(252.19911, 11974.556)(233.63324, 7891.479)(234.18361, 2072.11)
PS(10:0/17:0cycw7c)-PAMDB006708	1.12728	2.5726	0.797046	0.805009	0.314918	-20.2561	0.0890131	-0.760571	-0.0890131	-19.5119	-0.391713	-19.5432	PS(10:0/17:0cycw7c)-PAMDB006708	PS(10:0/17:0cycw7c)-PAMDB006708 [ C33 H60 N O10 P, tgt=46.15, overall=46.15 ]			(661.6491, 238845.61)(662.652, 105868.79)(664.1087, 66886.61)(665.1118, 6846.814)
PG(16:0/10:0(3-OH))-PAMDB004083	0.575754	0.207411	0.0662022	0.228659	0.0963306	-0.0876827	-1.07702	-0.0889358	-1.05029	-0.0662022	-0.622459	0.216705	PG(16:0/10:0(3-OH))-PAMDB004083	PG(16:0/10:0(3-OH))-PAMDB004083 [ C32 H63 O11 P, tgt=66.97, overall=66.97 ]			(638.4056, 5712.765)(639.408, 1553.6918)(678.3972, 26740.463)(679.39984, 6747.4546)(680.4018, 267.33)
Vaccenic acid_BMDB03231	0.673344	0.657192	-0.534178	-0.341509	0.00588226	-0.00588226	-0.446711	-29.1644	-0.447968	0.494982	0.14739	0.612705	Vaccenic acid_BMDB03231	Vaccenic acid_BMDB03231 [ C18 H34 O2, tgt=92.28, overall=92.28 ]			(265.2484, 593657.94)(266.2513, 98368.05)(267.25427, 5525.8926)(268.2583, 30389.469)(269.26117, 4040.67)(282.27502, 1.1418404E7)(283.27783, 2470817.2)(284.28143, 241057.31)(285.28415, 11129.535)
1-Dodecanoyl-sn-glycerol3-phosphate-PAMDB001536	0.259546	-0.20155	0.104609	4.71703	-0.810377	-0.415012	0.588705	-1.82656	-0.104609	1.87922	-18.072	1.26921	1-Dodecanoyl-sn-glycerol3-phosphate-PAMDB001536	1-Dodecanoyl-sn-glycerol3-phosphate-PAMDB001536 [ C15 H29 O7 P, tgt=65.86, overall=65.86 ]			(352.16348, 22869.496)(353.16592, 1762.8401)(370.2024, 2112.45)(355.761, 42368.516)(353.1974, 53637.13)
Crotonobetaine-PAMDB001723	0.169689	-0.0167389	-0.287304	0.305365	0.042057	0.309481	-0.682648	0.21883	-0.797585	0.0167389	-19.9724	-19.8554	Crotonobetaine-PAMDB001723	Crotonobetaine-PAMDB001723 [ C7 H13 N O2, tgt=73.55, overall=73.55 ]			(145.09819, 4012.1929)(147.11351, 7045.8594)(161.12938, 23378.24)(162.1323, 752.106)(151.97345, 409.3511)
PS(14:0/18:1(11Z))-PAMDB001466	20.2292	20.886	-1.17563	20.3332	20.4392	-0.670048	-0.836014	-0.770327	-0.757042	0.0741291	-0.0741272	17.0429	PS(14:0/18:1(11Z))-PAMDB001466	PS(14:0/18:1(11Z))-PAMDB001466 [ C38 H72 N O10 P, tgt=18.40, overall=18.40 ]			(738.4876, 1356.9)(740.5058, 169.37)(717.3094, 19506.035)(718.3118, 5972.5737)(718.5132, 167.02)(733.5253, 5479.84)
Cytidine-PAMDB000033	0.399543	0.10002	-0.10002	-0.189256	-0.443044	-0.398908	-18.483	-0.120513	0.102807	0.887385	0.626534	0.92389	Cytidine-PAMDB000033	Cytidine-PAMDB000033 [ C9 H13 N3 O5, tgt=67.57, overall=67.57 ]			(243.08327, 22679.684)(244.08582, 889.90375)(226.07487, 15476.714)(230.09169, 1929.8232)
PE(18:1(11Z)/16:1(9Z))-PAMDB000765	1.5334	-0.224635	-1.83074	-19.3594	4.37516	-19.3451	-19.511	-0.882234	0.224635	5.07224	1.82266	3.73239	PE(18:1(11Z)/16:1(9Z))-PAMDB000765	PE(18:1(11Z)/16:1(9Z))-PAMDB000765 [ C39 H74 N O8 P, tgt=64.14, overall=64.14 ]			(718.5207, 5702.0566)(719.02576, 3469.81)(720.0226, 3380.645)(721.5189, 941.68)(703.5142, 57.67)(717.8532, 7102.6035)(719.5156, 4751.25)(721.5176, 1366.35)(700.2628, 2930.8477)(700.8481, 5851.3535)(701.85504, 13932.993)(702.861, 7247.9766)(703.86884, 18809.244)(704.53625, 9225.59)(735.5534, 8023.929)(736.8048, 2372.0176)(743.42004, 26596.29)(743.5256, 2651.31)(744.5384, 4914.14)(721.4923, 9818.51…
DG(18:0/18:1(9Z)/0:0)-PAMDB003692	0.482298	1.75502	3.13541	4.39574	1.67216	4.04458	-1.58787	-0.482298	-2.44229	-22.4596	-22.6079	-22.4909	DG(18:0/18:1(9Z)/0:0)-PAMDB003692	DG(18:0/18:1(9Z)/0:0)-PAMDB003692 [ C39 H74 O5, tgt=60.79, overall=60.79 ]			(605.5359, 7751.8525)(606.5392, 31.775002)(645.6144, 317.86)(628.0902, 571088.25)(629.09515, 221450.5)(630.09814, 38308.56)(631.54596, 6152.722)
PE(14:0/14:0)-PAMDB000751	-0.369043	-0.58124	1.37052	0.369043	-0.494204	1.32026	1.91221	-0.512693	1.82165	1.99445	-0.912256	-0.675226	PE(14:0/14:0)-PAMDB000751	PE(14:0/14:0)-PAMDB000751 [ C33 H66 N O8 P, tgt=25.46, overall=25.46 ]			(637.4565, 12409.304)(638.4589, 2334.66)(617.4472, 397.11334)(618.4528, 634.15)(623.4411, 2905.95)(637.4559, 18717.768)(638.4582, 3263.8232)(618.4549, 832.48)(657.4936, 33481.117)(658.49695, 14109.775)(659.5071, 12951.925)(662.2645, 1349.9601)(664.4448, 383.45)(645.45776, 1540.5901)(646.4617, 320.895)
PS(17:0cycw7c/16:0)-PAMDB006730	-0.831249	20.5661	18.8849	-0.668741	20.0136	-0.654404	-0.82037	-0.754683	20.9897	0.0897732	-0.0584831	0.058485	PS(17:0cycw7c/16:0)-PAMDB006730	PS(17:0cycw7c/16:0)-PAMDB006730 [ C39H72NO10P, tgt= ]			(749.5203, 111.57)(733.5068, 383.90002)(764.5353, 1277.605)(766.5192, 3104.645)(767.5165, 296.24)
PG(10:0(3-OH)/15:0)-PAMDB004027	3.90035	3.82219	1.52182	-0.310134	0.985864	0.796163	0.310134	-17.4167	-0.423114	-16.5723	-16.7205	-16.6036	PG(10:0(3-OH)/15:0)-PAMDB004027	PG(10:0(3-OH)/15:0)-PAMDB004027 [ C31 H61 O11 P, tgt=75.44, overall=75.44 ]			(642.424, 114791.484)(643.4267, 38051.5)(644.42865, 4923.52)(625.3975, 25344.738)(626.4004, 7080.242)(627.4037, 456.99)(642.42334, 11727.579)(643.4261, 2196.285)(647.3784, 8557.042)(648.38165, 1695.2733)
PE(17:0cycw7c/10:0)-PAMDB002016	0.720452	1.89078	-20.3377	0.00589848	0.682517	-19.8321	0.84076	-0.650321	-0.00589848	-19.0879	-1.09747	1.2155	PE(17:0cycw7c/10:0)-PAMDB002016	PE(17:0cycw7c/10:0)-PAMDB002016 [ C32 H62 N O8 P, tgt=65.80, overall=65.80 ]			(607.4307, 139.27)(637.4563, 23594.816)(638.4588, 4190.1377)(619.442, 16003.568)(620.4454, 3066.6802)
PGP(14:0(3-OH)/19:0cycv8c)-PAMDB006576	0.160475	0.138462	0.198771	-16.5747	-16.8484	-16.5604	0.245966	-16.6607	-0.138462	1.61568	-15.9645	0.660089	PGP(14:0(3-OH)/19:0cycv8c)-PAMDB006576	PGP(14:0(3-OH)/19:0cycv8c)-PAMDB006576 [ C39 H76 O14 P2, tgt=16.26, overall=16.26 ]			(854.4847, 8513.453)(855.48724, 2391.1914)
PG(14:0/18:1(11Z))-PAMDB001464	2.12615	0.0270386	-0.657528	0.796513	-0.927853	0.0827198	-0.334435	-0.799709	-0.0270386	0.0872555	0.787495	-0.149345	PG(14:0/18:1(11Z))-PAMDB001464	PG(14:0/18:1(11Z))-PAMDB001464 [ C38 H73 O10 P, tgt=64.39, overall=64.39 ]			(721.4924, 11758.774)(722.498, 4717.005)(723.5023, 905.73)(709.011, 80592.445)(709.5015, 62829.723)(742.20575, 43645.3)(743.5274, 982.51)(720.518, 9837.235)(721.5167, 1994.0442)(725.46686, 793.2025)
PS(14:0/17:0cycw7c)-PAMDB006711	18.5603	17.9624	-0.498417	-0.00716972	-0.280809	0.00716782	-0.158798	-0.093111	-0.0798264	0.751345	0.603088	0.720057	PS(14:0/17:0cycw7c)-PAMDB006711	PS(14:0/17:0cycw7c)-PAMDB006711 [ C37 H68 N O10 P, tgt=12.98, overall=12.98 ]			(717.4426, 10146.15)(718.4457, 1868.47)
PG(16:1(9Z)/17:0cycw7c)-PAMDB006502	-3.93915	0.428424	0.00436687	-20.7188	0.0826273	-0.00436687	0.107686	0.0550451	0.148732	-1.51941	-0.613959	-1.80485	PG(16:1(9Z)/17:0cycw7c)-PAMDB006502	PG(16:1(9Z)/17:0cycw7c)-PAMDB006502 [ C39 H73 O10 P, tgt=41.13, overall=41.13 ]			(733.5032, 4574.99)(716.50903, 18682.098)(717.5121, 5305.2373)(718.7984, 14273.069)(719.80023, 4270.611)(718.5132, 155.44)(734.53217, 887.48254)(738.4885, 728.63)
PE(16:1(9Z)/12:0(3-OH))-PAMDB003896	0.69489	1.79023	-0.725474	-0.221883	1.85302	-0.339934	-0.741698	-1.03795	-0.64335	0.621585	0.221883	1.01346	PE(16:1(9Z)/12:0(3-OH))-PAMDB003896	PE(16:1(9Z)/12:0(3-OH))-PAMDB003896 [ C33 H64 N O9 P, tgt=60.85, overall=60.85 ]			(667.4661, 12995.5625)(668.4687, 1949.9149)
ethanesulfonate-PAMDB006371	-0.905378	16.6141	17.2041	-0.74287	-1.01651	-0.728533	-0.894499	17.0957	17.345	0.0156441	18.5507	-0.0156441	ethanesulfonate-PAMDB006371	ethanesulfonate-PAMDB006371 [ C2 H5 O3 S, tgt= ]			(110.0063, 22056.285)(111.007675, 1691.1599)(112.00386, 1254.808)
PGP(12:0/10:0(3-OH))-PAMDB006560	0.558084	0.0814037	3.54508	3.67231	-0.191345	-0.130423	-0.538303	-0.576353	-0.768263	-0.0814037	2.64897	0.335918	PGP(12:0/10:0(3-OH))-PAMDB006560	PGP(12:0/10:0(3-OH))-PAMDB006560 [ C28 H56 O14 P2, tgt=88.93, overall=88.93 ]			(682.351, 73012.87)(683.35345, 20207.455)(684.3554, 1759.3333)
PS(18:0/16:0)-PAMDB006266	-21.8922	-1.43883	-22.2209	-21.7297	0.400208	0.945357	0.0756903	0.929956	1.15219	-20.9712	0.413976	-0.0756903	PS(18:0/16:0)-PAMDB006266	PS(18:0/16:0)-PAMDB006266 [ C40 H78 N O10 P, tgt=50.99, overall=50.99 ]			(764.5363, 556.01855)(745.54254, 12765.803)(746.5485, 1967.5427)(764.5332, 394.25)(783.5607, 400.84)(785.4078, 1649.4816)(786.58417, 3918.8948)(787.5897, 150.315)
O-Methylmalonylcarnitine_BMDB62654	0.192013	-0.284332	-0.614197	-0.0641918	-0.183054	0.0641918	-0.168461	0.1056	-0.232004	1.27326	0.252464	1.15236	O-Methylmalonylcarnitine_BMDB62654	O-Methylmalonylcarnitine_BMDB62654 [ C11 H19 N O6, tgt=98.38, overall=98.38 ]			(263.12216, 504.47665)(279.15454, 355249.66)(280.15732, 45204.23)(281.15942, 2600.915)
(1R)-Hydroxy-(2R)-glutathionyl-12-dihydronaphthalene-PAMDB000853	-0.0624332	0.261276	0.0642185	0.429466	0.0624332	0.232258	-0.0827503	-0.0632877	-0.114271	0.751776	-21.2216	-21.1046	(1R)-Hydroxy-(2R)-glutathionyl-12-dihydronaphthalene-PAMDB000853	(1R)-Hydroxy-(2R)-glutathionyl-12-dihydronaphthalene-PAMDB000853 [ C20 H25 N3 O7 S, tgt=57.85, overall=57.85 ]			(453.15933, 158951.3)(454.16187, 28751.285)(455.15927, 8373.654)
2-octadecanoyl-sn-glycerol3-phosphate-PAMDB001572	-22.0982	-1.35468	-22.4269	-0.445898	-0.655983	-0.212893	0.212893	0.267872	0.41028	1.39057	1.02669	1.21997	2-octadecanoyl-sn-glycerol3-phosphate-PAMDB001572	2-octadecanoyl-sn-glycerol3-phosphate-PAMDB001572 [ C21H43O7P, tgt= ]			(461.26434, 133677.45)(462.26605, 13927.18)
Diaminopimelic acid_BMDB01370	0.837566	-0.0628452	-0.105236	0.771368	0.416136	0.636215	-1.11725	0.0628452	-1.01942	-0.117825	-0.538597	0.24328	Diaminopimelic acid_BMDB01370	Diaminopimelic acid_BMDB01370 [ C7 H14 N2 O4, tgt=92.25, overall=92.25 ]			(194.11359, 5724.0796)(208.12761, 272239.28)(209.13033, 20681.822)(210.1327, 1055.19)
PG(14:0/14:0(3-OH))-PAMDB004073	-0.393725	7.65827	-0.813796	7.30236	7.11152	7.33118	0.132567	-1.34592	-0.132567	1.2449	-17.5983	-17.4813	PG(14:0/14:0(3-OH))-PAMDB004073	PG(14:0/14:0(3-OH))-PAMDB004073 [ C34 H67 O11 P, tgt=35.81, overall=35.81 ]			(664.44507, 798874.7)(665.4479, 171228.62)(666.4496, 16415.838)(688.0221, 11848.971)(689.4213, 4850.6133)
DG(15:0/19:1(9Z)/0:0)-PAMDB003666	0.541729	0.0660953	-0.32855	-0.0319977	0.0319977	0.125782	-20.5274	0.125782	-20.4484	0.564198	-19.7655	-0.174486	DG(15:0/19:1(9Z)/0:0)-PAMDB003666	DG(15:0/19:1(9Z)/0:0)-PAMDB003666 [ C37 H70 O5, tgt=86.88, overall=86.88 ]			(595.5277, 3053.7446)(578.30383, 1318.0701)(617.51105, 60465.168)(618.51355, 17875.205)(619.5129, 1998.7067)(601.00995, 15267.578)(601.5102, 4220.9062)(603.52246, 593.6367)
DG(17:0cycw7c/16:1(9Z)/0:0)-PAMDB006925	-2.39361	0.28745	0.0212317	1.1891	0.486894	0.274919	-0.268937	0.602189	-0.0212317	-23.6357	-23.784	-2.6432	DG(17:0cycw7c/16:1(9Z)/0:0)-PAMDB006925	DG(17:0cycw7c/16:1(9Z)/0:0)-PAMDB006925 [ C36 H66 O5, tgt=63.21, overall=63.21 ]			(560.4759, 7957.7197)(561.47253, 1923.4187)(563.2542, 26649.027)(564.5049, 4833.497)(565.5059, 2421.3)(578.5106, 21651.459)(579.51935, 7771.627)(602.16504, 88881.875)(603.5029, 4924.66)(585.47974, 9928.234)(586.2582, 3001.7666)(587.4854, 2672.8533)(588.48627, 912.69995)(588.4796, 332.44)
DG(18:1(9Z)/17:0cycw7c/0:0)-PAMDB006932	-0.526121	21.1834	-0.85486	-0.363613	-0.637253	19.0354	21.6374	-0.449554	-0.43627	20.781	18.9143	0.363613	DG(18:1(9Z)/17:0cycw7c/0:0)-PAMDB006932	DG(18:1(9Z)/17:0cycw7c/0:0)-PAMDB006932 [ C38H70O5, tgt= ]			(590.76526, 3634.715)(591.5223, 2709.22)(613.51605, 54516.02)(614.51855, 15647.3545)(615.52576, 6234.0225)(615.5256, 4791.99)(616.5288, 264.99)
N2-Succinyl-L-glutamicacid5-semialdehyde-PAMDB000287	0.169946	-0.0350275	-0.253524	-0.0273619	0.740979	-0.0941877	0.0273619	-0.549415	0.0812921	0.793799	0.471568	-17.5535	N2-Succinyl-L-glutamicacid5-semialdehyde-PAMDB000287	N2-Succinyl-L-glutamicacid5-semialdehyde-PAMDB000287 [ C9 H13 N O6, tgt=46.81, overall=46.81 ]			(213.06339, 11624.882)(249.10713, 6463.6895)
PGP(16:0/19:0)-PAMDB006408	0.0703878	0.114743	-0.116275	-0.228372	-0.0793161	-0.0703878	0.238133	-1.21279	0.237395	0.627847	-1.26398	0.0801401	PGP(16:0/19:0)-PAMDB006408	PGP(16:0/19:0)-PAMDB006408 [ C41 H82 O13 P2, tgt=40.67, overall=40.67 ]			(868.50116, 32812.88)(869.5037, 11741.782)(870.505, 1770.7545)
2-tetradec-7-enoyl-sn-glycerol3-phosphate-PAMDB001574	0.673032	0.416842	0.491048	0.241828	-0.303271	-0.0532579	-0.342584	0.0532579	-2.81352	-1.48741	0.714236	-2.11128	2-tetradec-7-enoyl-sn-glycerol3-phosphate-PAMDB001574	2-tetradec-7-enoyl-sn-glycerol3-phosphate-PAMDB001574 [ C17 H33 O7 P, tgt=53.57, overall=53.57 ]			(403.24817, 1402.4767)(404.19894, 32385.768)(405.20187, 4948.4507)(406.2044, 127.79)(387.17358, 261904.64)(388.17642, 48129.168)(389.17847, 4580.093)
2-Phenyl-13-propanediolmonocarbamate-PAMDB000897	0.697691	0.170759	-0.170759	2.47845	-0.755445	-19.0896	-19.2555	-19.1898	2.3669	3.18487	2.57238	-18.3767	2-Phenyl-13-propanediolmonocarbamate-PAMDB000897	2-Phenyl-13-propanediolmonocarbamate-PAMDB000897 [ C10 H13 N O3, tgt=63.16, overall=63.16 ]			(195.9663, 20457.104)(197.09326, 1701.79)(180.0959, 2333.56)(197.11716, 72362.91)(200.1253, 3012.08)
Ethyl glutarate_BMDB62557	0.462564	-0.293378	-0.0944319	0.587878	0.0944319	0.222489	-0.615243	-0.18818	-0.847663	0.0999479	-0.12613	0.275254	Ethyl glutarate_BMDB62557	Ethyl glutarate_BMDB62557 [ C9 H16 O4, tgt=54.02, overall=54.02 ]			(171.09836, 12278.673)(193.07965, 5001.1694)(188.12492, 121650.32)(189.12773, 6894.34)
5-Hydroxylysine_BMDB00450	0.20017	-0.841748	-0.484563	0.186501	-0.467826	-0.552947	1.19902	1.55291	1.05287	-0.186501	-17.3464	0.745	5-Hydroxylysine_BMDB00450	5-Hydroxylysine_BMDB00450 [ C6 H14 N2 O3, tgt=76.15, overall=76.15 ]			(163.10867, 3400.0525)(145.09836, 3693.0103)(180.1346, 14775.841)(181.1369, 435.28)
Serylmethionine_BMDB62258	-0.169678	18.1424	16.8468	-0.00716972	-0.280809	0.00716782	-0.158798	-0.093111	-0.0798264	0.751345	0.603088	0.720057	Serylmethionine_BMDB62258	Serylmethionine_BMDB62258 [ C8 H16 N2 O4 S, tgt= ]			(237.08195, 12068.67)(240.09674, 2790.25)(242.09491, 19213.455)
PG(12:0(3-OH)/10:0)-PAMDB004039	-0.0403547	0.0176706	-0.302957	-0.521392	-0.383344	-0.138915	0.892104	-0.0176706	0.469525	1.45491	0.749696	1.11184	PG(12:0(3-OH)/10:0)-PAMDB004039	PG(12:0(3-OH)/10:0)-PAMDB004039 [ C28 H55 O11 P, tgt=79.69, overall=79.69 ]			(599.3798, 142055.36)(600.3823, 36589.105)(601.38385, 4018.0208)(603.3275, 826.942)
D-Maltose-PAMDB000065	-0.353734	0.28869	0.0426664	-1.05069	-1.41269	-0.0235109	-0.43426	0.0235109	0.180655	-0.406219	0.734988	0.262403	D-Maltose-PAMDB000065	D-Maltose-PAMDB000065 [ C12 H22 O11, tgt=63.76, overall=63.76 ]			(343.11697, 49482.45)(344.11975, 3536.9517)(325.1066, 31819.656)(326.10956, 1753.6617)(360.1428, 25569.467)(361.14584, 1400.0134)(365.09924, 786469.94)(366.10226, 86900.73)(367.10306, 12424.948)
DG(12:0(3-OH)/15:0/0:0)-PAMDB006873	-22.834	3.2274	-23.1628	-0.698695	0.698695	-22.6572	2.71432	1.0524	1.03328	1.78019	-22.0612	-21.9443	DG(12:0(3-OH)/15:0/0:0)-PAMDB006873	DG(12:0(3-OH)/15:0/0:0)-PAMDB006873 [ C30H58O6, tgt= ]			(517.2178, 262384.66)(517.4189, 131890.97)(518.42163, 25335.916)(519.4263, 3437.035)(521.4463, 64900.543)(534.6176, 12102.093)(536.0429, 7361.989)(537.478, 3570.2117)(540.5823, 17759.18)(541.58636, 5770.942)(542.1763, 156311.38)(543.43475, 99355.07)(525.4044, 36.36)
Ubiquinone-10-PAMDB000242	-0.126179	20.5503	-0.454918	0.0363293	-0.23731	0.0506668	-0.115299	-0.049612	-0.0363274	0.794844	0.646587	0.763556	Ubiquinone-10-PAMDB000242	Ubiquinone-10-PAMDB000242 [ C59H90O4, tgt= ]			(880.7255, 20151.74)(881.7286, 3734.97)
PS(10:0(3-OH)/10:0(3-OH))-PAMDB003926	0.591576	0.457314	0.394453	-0.106668	-0.0214615	0.0214615	0.961947	-1.30006	0.753357	-20.8334	-0.967112	-20.8647	PS(10:0(3-OH)/10:0(3-OH))-PAMDB003926	PS(10:0(3-OH)/10:0(3-OH))-PAMDB003926 [ C26 H48 N O12 P, tgt=48.92, overall=48.92 ]			(584.29956, 250.985)(621.29895, 126495.9)(622.3015, 33458.82)(623.3031, 2990.3093)
D-Myo-inositol(1)-monophosphate-PAMDB001350	-0.831249	18.568	17.8579	-0.668741	-0.942381	-0.654404	-0.82037	17.3699	17.7674	0.0897732	-0.0584831	0.058485	D-Myo-inositol(1)-monophosphate-PAMDB001350	D-Myo-inositol(1)-monophosphate-PAMDB001350 [ C6 H13 O9 P, tgt=48.78, overall=48.78 ]			(261.03217, 2155.51)(260.04822, 28408.873)(261.54883, 695.8)(262.0468, 497.13)(283.01324, 1107.245)
Phosphoribosylformylglycineamidine-PAMDB000220	0.0488939	2.3602	1.64548	-0.843413	-1.7616	0.61848	-0.0488939	1.34017	1.43248	-19.3693	-19.5176	-19.4006	Phosphoribosylformylglycineamidine-PAMDB000220	Phosphoribosylformylglycineamidine-PAMDB000220 [ C8 H16 N3 O8 P, tgt=79.85, overall=79.85 ]			(296.06097, 445823.5)(297.06345, 27517.191)(298.0594, 23462.115)(299.0618, 804.15)(321.0512, 399.495)
PGP(19:0cycv8c/14:0(3-OH))-PAMDB006634	0.160475	0.138462	0.198771	-16.5747	-16.8484	-16.5604	0.245966	-16.6607	-0.138462	1.61568	-15.9645	0.660089	PGP(19:0cycv8c/14:0(3-OH))-PAMDB006634	PGP(19:0cycv8c/14:0(3-OH))-PAMDB006634 [ C39 H76 O14 P2, tgt=16.26, overall=16.26 ]			(854.4847, 8513.453)(855.48724, 2391.1914)
Farnesylpyrophosphate-PAMDB000210	1.18064	0.707394	0.806454	-0.355326	-0.114813	0.114813	0.360914	-17.3859	-0.277578	1.72688	-16.6897	-16.5728	Farnesylpyrophosphate-PAMDB000210	Farnesylpyrophosphate-PAMDB000210 [ C15 H28 O7 P2, tgt=26.97, overall=26.97 ]			(407.13684, 4310.5225)(365.127, 1799.2949)(382.1393, 12523.152)(383.14246, 1349.1625)(387.17236, 4591.2324)
FR901463-PAMDB100002	1.84316	1.9072	1.9788	-17.3243	0.367959	1.01003	1.39383	-17.4103	-0.486299	-16.5658	-0.367959	-16.5971	FR901463-PAMDB100002	FR901463-PAMDB100002 [ C27 H42 Cl N O8, tgt=59.27, overall=59.27 ]			(527.2384, 15253.609)(528.2408, 1550.4601)(529.2368, 4685.96)(553.24475, 10015.129)(554.2474, 2848.6848)
Isethionicacid-PAMDB001641	-2.65875	0.840045	0.774428	-3.6674	-5.47578	-0.993464	-1.31436	0.905469	0.860494	-0.146691	1.70515	0.146691	Isethionicacid-PAMDB001641	Isethionicacid-PAMDB001641 [ C2 H6 O4 S, tgt=76.23, overall=76.23 ]			(128.99666, 7262.673)(112.9876, 9462.55)(145.03177, 4224.63)(146.03264, 659.95996)(147.0285, 1090.19)(127.02179, 113932.13)(128.5665, 10604.98)(130.0199, 718.275)(130.9764, 76754.92)
DG(19:0cycv8c/14:0/0:0)-PAMDB006936	0.43595	1.50626	0.0709658	1.31169	-0.0709658	-0.584905	0.977351	-0.30107	0.984223	-20.3269	-20.4752	-2.3566	DG(19:0cycv8c/14:0/0:0)-PAMDB006936	DG(19:0cycv8c/14:0/0:0)-PAMDB006936 [ C36 H68 O5, tgt=54.87, overall=54.87 ]			(563.49097, 3828.8657)(565.5071, 10906.234)(566.5089, 3305.92)(604.51636, 2258.4668)(564.5221, 1957.71)(582.5135, 4578.38)(587.9288, 39369.79)(587.4952, 15057.898)(588.49677, 1683.4349)(580.5247, 7599.29)
2-hexadec-9-enoyl-sn-glycerol3-phosphate-PAMDB001569	1.22086	0.267375	0.724078	1.27515	-0.548116	0.738906	-0.267375	-0.722495	-0.355857	0.664018	-16.6694	-16.5524	2-hexadec-9-enoyl-sn-glycerol3-phosphate-PAMDB001569	2-hexadec-9-enoyl-sn-glycerol3-phosphate-PAMDB001569 [ C19 H37 O7 P, tgt=49.98, overall=49.98 ]			(432.73257, 56659.98)(433.23398, 13310.163)(434.23438, 927.39996)(415.2042, 170349.27)(416.20694, 40064.227)(417.20892, 3790.8872)(418.2242, 2090.0713)
PS(12:0(3-OH)/19:0cycv8c)-PAMDB003955	18.1236	17.5362	-0.498417	-0.00716972	-0.280809	0.00716782	-0.158798	-0.093111	-0.0798264	0.751345	0.603088	0.720057	PS(12:0(3-OH)/19:0cycv8c)-PAMDB003955	PS(12:0(3-OH)/19:0cycv8c)-PAMDB003955 [ C37 H68 N O11 P, tgt=38.03, overall=38.03 ]			(717.4426, 9497.175)(718.4457, 1713.0901)
PS(18:1(9Z)/18:1(9Z))-PAMDB006273	9.49066	8.36748	8.75709	9.62824	8.78972	8.94538	-9.27763	-9.21194	-9.19865	-8.36748	-8.51574	-8.39877	PS(18:1(9Z)/18:1(9Z))-PAMDB006273	PS(18:1(9Z)/18:1(9Z))-PAMDB006273 [ C42 H78 N O10 P, tgt=15.59, overall=15.59 ]			(810.5405, 12158.715)(811.5432, 3021.5583)
PE(16:0/10:0)-PAMDB002010	-0.366112	-0.292303	-0.843826	-0.145761	-0.230135	-0.029438	0.374624	0.267141	0.029438	0.826031	1.10939	0.718037	PE(16:0/10:0)-PAMDB002010	PE(16:0/10:0)-PAMDB002010 [ C31 H62 N O8 P, tgt=90.01, overall=90.01 ]			(631.4773, 191.41)(609.4496, 197950.42)(610.45245, 63076.52)(611.4577, 12731.375)(612.46387, 847.44995)(613.47766, 7508.214)
Agmatine-PAMDB000385	10.7375	9.49042	9.99243	10.8044	10.0165	10.6286	-10.4006	-10.3349	-10.3216	-9.49042	-9.63868	-9.52171	Agmatine-PAMDB000385	Agmatine-PAMDB000385 [ C5 H14 N4, tgt=82.37, overall=82.37 ]			(130.12021, 93723.1)(131.1232, 3742.925)
PG(17:0cycw7c/14:0(3-OH))-PAMDB004093	-18.3893	0.978498	0.279579	-18.2268	0.447626	-18.2124	-0.0324745	-18.3127	-0.0208435	0.0208435	2.01193	2.27475	PG(17:0cycw7c/14:0(3-OH))-PAMDB004093	PG(17:0cycw7c/14:0(3-OH))-PAMDB004093 [ C37H71O11P, tgt= ]			(710.5056, 12672.59)(740.8437, 9775.251)(741.5098, 2281.21)(722.4947, 11281.624)(723.495, 3279.91)(731.4679, 2540.3525)(732.4699, 1166.96)
DG(16:1(9Z)/19:0cycw8c/0:0)-PAMDB006917	-0.526121	21.1834	-0.85486	-0.363613	-0.637253	19.0354	21.6374	-0.449554	-0.43627	20.781	18.9143	0.363613	DG(16:1(9Z)/19:0cycw8c/0:0)-PAMDB006917	DG(16:1(9Z)/19:0cycw8c/0:0)-PAMDB006917 [ C38 H70 O5, tgt=47.29, overall=47.29 ]			(590.76526, 3634.715)(591.5223, 2709.22)(613.51605, 54516.02)(614.51855, 15647.3545)(615.52576, 6234.0225)(615.5256, 4791.99)(616.5288, 264.99)
PG(17:0/14:0)-PAMDB001502	2.05312	0.613619	-23.748	0.40502	0.158459	-0.158459	-0.603779	-0.512297	-0.560699	-22.4983	1.8098	1.63563	PG(17:0/14:0)-PAMDB001502	PG(17:0/14:0)-PAMDB001502 [ C37 H73 O10 P, tgt=48.96, overall=48.96 ]			(694.481, 2599.76)(695.484, 804.79)(729.4028, 5643.1475)(728.5351, 1099.59)(729.5462, 5266.34)(709.01166, 86380.586)(710.0143, 33554.082)(710.5038, 9640.376)(731.4689, 7569.12)(732.4718, 1519.734)
Eicosenoic acid_BMDB02231	0.930165	0.314155	-0.0957804	0.568036	0.0957804	0.647998	-1.73488	-0.115109	-2.43146	-1.62012	4.68002	-1.88708	Eicosenoic acid_BMDB02231	Eicosenoic acid_BMDB02231 [ C20 H38 O2, tgt=66.59, overall=66.59 ]			(293.2787, 20709.57)(294.2816, 1329.36)(296.2893, 17173.04)(297.2924, 335.8)(296.2899, 1247669.2)(297.29294, 232128.8)(298.30032, 27952.557)(310.3043, 73139.01)(311.30713, 15171.082)(318.2692, 1655.6799)
N-(3-oxododecanoyl)homoserinelactone-PAMDB100049	0.311388	0.0243034	0.253304	-0.198709	-0.0243034	-0.0877552	0.582312	-0.584934	0.232351	1.61157	-17.149	-17.032	N-(3-oxododecanoyl)homoserinelactone-PAMDB100049	N-(3-oxododecanoyl)homoserinelactone-PAMDB100049 [ C16 H27 N O4, tgt=74.08, overall=74.08 ]			(300.8661, 1454.6466)(302.2029, 1026.29)(318.23444, 99664.15)(319.23703, 12871.542)(320.1832, 14998.122)(321.1868, 311.64)(306.1772, 6517.292)
PS(16:1(9Z)/18:1(11Z))-PAMDB001473	21.4702	21.9597	-1.15999	21.7291	21.6919	-0.654404	-0.82037	-0.754683	-0.741398	0.0897732	-0.0584831	0.058485	PS(16:1(9Z)/18:1(11Z))-PAMDB001473	PS(16:1(9Z)/18:1(11Z))-PAMDB001473 [ C40 H74 N O10 P, tgt=20.27, overall=20.27 ]			(764.0016, 2805.145)(764.5033, 3506.35)(742.5227, 34755.594)(743.5254, 12374.925)(744.5292, 1034.845)
1-Methylhistidine_BMDB00001	1.22868	0.630087	-0.681559	0.930748	0.354424	0.274561	0.104136	-0.104136	-0.644739	-0.589766	-17.7791	-0.739204	1-Methylhistidine_BMDB00001	1-Methylhistidine_BMDB00001 [ C7 H11 N3 O2, tgt=51.95, overall=51.95 ]			(169.08229, 7680.3413)(170.093, 497.13)(151.07195, 18425.857)(152.0751, 232.25)(170.9535, 5448.3584)(153.08778, 34242.2)(187.54778, 39140.793)(189.12776, 4877.86)(170.11456, 277774.62)(171.61858, 1255.1975)(193.47885, 4301.9756)(177.06676, 6177.983)
PG(15:0/16:1)-PAMDB002030	-2.02	-2.59431	-3.49277	-2.41265	0.00765324	0.386426	1.17784	1.01104	-0.00765324	2.1814	2.41417	-20.5862	PG(15:0/16:1)-PAMDB002030	PG(15:0/16:1)-PAMDB002030 [ C37 H71 O10 P, tgt=55.41, overall=55.41 ]			(710.82666, 34864.67)(711.74585, 13895.526)(710.50574, 8477.585)(689.4782, 7265.2114)(690.4813, 1159.1141)(727.5337, 279.725)(708.96136, 28685.34)(709.8038, 12924.553)(710.5045, 5907.2354)
PS(18:1(9Z)/10:0(3-OH))-PAMDB003999	0.459727	0.405828	-0.129275	-0.00370121	0.00370121	-0.162919	1.26707	-0.142058	1.36305	2.24987	-16.2183	-16.1013	PS(18:1(9Z)/10:0(3-OH))-PAMDB003999	PS(18:1(9Z)/10:0(3-OH))-PAMDB003999 [ C34 H62 N O11 P, tgt=36.78, overall=36.78 ]			(695.28815, 5626.224)(696.8524, 8488.441)(697.41003, 3071.434)(675.4079, 8559.44)(676.4106, 1231.4)(678.3973, 35071.055)(679.39984, 9440.193)(680.4018, 411.28)(718.3871, 2172.2834)
PGP(19:0/16:0)-PAMDB006433	0.0703878	0.114743	-0.116275	-0.228372	-0.0793161	-0.0703878	0.238133	-1.21279	0.237395	0.627847	-1.26398	0.0801401	PGP(19:0/16:0)-PAMDB006433	PGP(19:0/16:0)-PAMDB006433 [ C41 H82 O13 P2, tgt=40.67, overall=40.67 ]			(868.50116, 32812.88)(869.5037, 11741.782)(870.505, 1770.7545)
PE(18:1(9Z)/14:0(3-OH))-PAMDB003905	10.3942	11.275	10.2629	8.83929	-9.84016	-9.55218	11.4343	-9.65246	-9.63918	13.8036	-8.95626	-8.83929	PE(18:1(9Z)/14:0(3-OH))-PAMDB003905	PE(18:1(9Z)/14:0(3-OH))-PAMDB003905 [ C37 H72 N O9 P, tgt=74.02, overall=74.02 ]			(708.49756, 100809.36)(709.50085, 41175.484)(710.5029, 13668.9)(708.5005, 35169.035)(709.5032, 13214.0)(710.5049, 2022.52)(727.5337, 6270.277)(728.875, 1494.66)(729.5475, 11368.48)(706.5293, 10819.37)(707.5294, 4325.68)(716.5093, 2002.7)
FAICAR-PAMDB006305	-0.459954	1.53869	1.46536	-1.36755	-18.4927	0.459954	-0.645867	1.02394	1.1642	-17.4606	1.9211	-0.494308	FAICAR-PAMDB006305	FAICAR-PAMDB006305 [ C10 H15 N4 O9 P, tgt=34.54, overall=34.54 ]			(370.07617, 47115.215)(371.07748, 5762.1333)(369.2757, 5482.724)(370.0773, 76360.43)(371.0786, 5853.53)(369.0775, 5168.05)
CDP-DG(15:0cyclo/17:0cycw7c)-PAMDB006798	0.172229	0.448964	0.118407	-0.121745	-0.0606852	-0.15692	0.0606852	-1.29048	-0.0706434	0.95082	-0.923909	0.88004	CDP-DG(15:0cyclo/17:0cycw7c)-PAMDB006798	CDP-DG(15:0cyclo/17:0cycw7c)-PAMDB006798 [ C44 H77 N3 O15 P2, tgt=38.59, overall=38.59 ]			(972.46356, 58788.41)(973.4664, 34231.457)(974.467, 1517.7761)
Undecanoic acid_BMDB00947	0.465229	-0.0844135	0.073494	-0.0473862	0.165962	0.0473862	0.68198	-0.382277	-0.0496902	0.983027	-19.826	-19.7091	Undecanoic acid_BMDB00947	Undecanoic acid_BMDB00947 [ C11 H22 O2, tgt=78.06, overall=78.06 ]			(169.15508, 438.82333)(186.1815, 2943.9333)(209.1501, 76973.336)(210.15279, 6319.2676)
D-Pipecolic acid_BMDB05960	-18.3987	0.981005	0.514164	1.15582	0.817993	0.946117	-0.920425	0.567955	-0.514164	-17.4777	-17.6259	-17.5089	D-Pipecolic acid_BMDB05960	D-Pipecolic acid_BMDB05960 [ C6H11NO2, tgt= ]			(130.83264, 4677.1484)(112.07295, 580.375)(147.11346, 11022.849)
PS(16:0/18:0)-PAMDB006261	-21.8922	-1.43883	-22.2209	-21.7297	0.400208	0.945357	0.0756903	0.929956	1.15219	-20.9712	0.413976	-0.0756903	PS(16:0/18:0)-PAMDB006261	PS(16:0/18:0)-PAMDB006261 [ C40 H78 N O10 P, tgt=50.99, overall=50.99 ]			(764.5363, 556.01855)(745.54254, 12765.803)(746.5485, 1967.5427)(764.5332, 394.25)(783.5607, 400.84)(785.4078, 1649.4816)(786.58417, 3918.8948)(787.5897, 150.315)
DG(14:0/19:0cycw8c/0:0)-PAMDB006896	0.43595	1.50626	0.0709658	1.31169	-0.0709658	-0.584905	0.977351	-0.30107	0.984223	-20.3269	-20.4752	-2.3566	DG(14:0/19:0cycw8c/0:0)-PAMDB006896	DG(14:0/19:0cycw8c/0:0)-PAMDB006896 [ C36 H68 O5, tgt=54.87, overall=54.87 ]			(563.49097, 3828.8657)(565.5071, 10906.234)(566.5089, 3305.92)(604.51636, 2258.4668)(564.5221, 1957.71)(582.5135, 4578.38)(587.9288, 39369.79)(587.4952, 15057.898)(588.49677, 1683.4349)(580.5247, 7599.29)
PG(14:0/15:0cyclo)-PAMDB006494	2.75104	2.04906	0.0707474	0.582626	0.419193	-19.5602	-19.7262	-0.0707474	-19.6472	-18.8161	0.932203	-18.8473	PG(14:0/15:0cyclo)-PAMDB006494	PG(14:0/15:0cyclo)-PAMDB006494 [ C35 H67 O10 P, tgt=51.67, overall=51.67 ]			(680.4668, 23199.996)(681.4694, 8004.77)(661.4246, 16355.395)(662.4274, 5712.533)(663.4417, 1707022.5)(664.4454, 765163.5)(665.44836, 169322.75)(666.4501, 17377.773)(663.4426, 1593437.4)(664.4462, 711638.9)(665.4489, 146915.27)(666.4505, 13660.652)(700.5089, 1921.365)(700.5087, 2262.37)(685.4228, 62103.27)(686.4254, 22006.541)(687.4274, 2540.8716)
Tryptophyl-Leucine_BMDB62264	11.4832	11.6818	11.4141	11.5117	11.181	11.6346	-12.0912	-12.0255	-12.0122	-11.181	-11.3293	-11.2123	Tryptophyl-Leucine_BMDB62264	Tryptophyl-Leucine_BMDB62264 [ C17 H23 N3 O3, tgt=60.70, overall=60.70 ]			(317.17233, 13277.44)(318.17392, 976.9551)(322.1518, 851.45)
pederin-PAMDB100063	0.140306	0.05266	-0.229645	0.177101	0.167324	0.0932217	-0.640268	-0.0646	-0.558619	-0.431992	-0.05266	0.0946445	pederin-PAMDB100063	pederin-PAMDB100063 [ C25 H45 N O9, tgt=69.45, overall=69.45 ]			(503.3057, 491.33)(524.3629, 257.97498)(505.3403, 19290.895)(506.3426, 3129.1243)
DG(18:1(9Z)/12:0/0:0)-PAMDB003695	2.44244	3.94519	-0.00271988	0.396084	2.80842	-22.6297	0.329378	-0.0246811	0.00271988	-21.8856	-22.0338	-21.9169	DG(18:1(9Z)/12:0/0:0)-PAMDB003695	DG(18:1(9Z)/12:0/0:0)-PAMDB003695 [ C33 H62 O5, tgt=51.88, overall=51.88 ]			(521.44574, 32789.2)(522.5953, 11966.198)(523.6059, 281388.94)(524.46576, 94743.79)(525.4678, 10648.46)(560.99774, 34082.01)(561.4998, 54565.965)(538.4795, 16152.37)(561.4629, 445.1)(543.5609, 52618.867)(544.64355, 15427.901)(545.6474, 1120.224)(547.459, 5154.6)
DG(14:0/14:0(3-OH)/0:0)-PAMDB006892	3.36418	3.88203	1.9279	-19.9363	1.41888	1.06724	-1.59351	-1.34623	-1.06724	-19.1778	-19.3261	3.60536	DG(14:0/14:0(3-OH)/0:0)-PAMDB006892	DG(14:0/14:0(3-OH)/0:0)-PAMDB006892 [ C31 H60 O6, tgt=51.61, overall=51.61 ]			(530.43054, 32994.363)(531.4327, 1525.67)(535.2145, 3023.2224)(548.2526, 33058.242)(549.592, 22038.668)(550.9876, 31187.664)(551.9923, 25028.398)(551.994, 37382.93)(552.4959, 10054.16)(534.4776, 29805.453)(555.24066, 4126.0693)(556.9464, 7922.98)(557.4487, 3296.08)(534.74854, 33383.04)(536.42737, 4609.1133)
Ribose-PAMDB000116	1.14695	-0.0109634	0.0109634	0.949301	-0.10059	0.938866	-1.93217	-19.263	-19.2497	0.895021	-18.5668	1.12832	Ribose-PAMDB000116	Ribose-PAMDB000116 [ C5 H10 O5, tgt=85.54, overall=85.54 ]			(150.05222, 36039.42)(151.05498, 1055.4667)(136.0589, 1353.1919)(156.039, 9080.61)
PE(10:0(3-OH)/15:0cyclo)-PAMDB003836	0.344003	1.15795	0.109607	0.096324	-0.325107	0.0747309	-0.31076	-0.394179	-1.08805	-1.23698	-0.0747309	0.138577	PE(10:0(3-OH)/15:0cyclo)-PAMDB003836	PE(10:0(3-OH)/15:0cyclo)-PAMDB003836 [ C30 H58 N O9 P, tgt=65.35, overall=65.35 ]			(607.3801, 89085.78)(608.3829, 27624.225)(609.3848, 2969.081)(589.3831, 4024.415)(590.3873, 732.26)(593.405, 1218.565)(594.4072, 235.74)(629.4485, 2914.03)(630.4496, 108.43)
9-Decenoic acid_BMDB31003	0.581192	-0.356915	-0.0151329	0.636387	0.0427856	0.103046	-0.599228	-1.37123	-3.19981	0.700073	-19.8557	0.0151329	9-Decenoic acid_BMDB31003	9-Decenoic acid_BMDB31003 [ C10 H18 O2, tgt=53.30, overall=53.30 ]			(155.3824, 6254.3047)(153.12444, 14035.112)(154.1268, 658.38)(188.16069, 3280.7185)(170.1508, 81699.375)(171.15373, 5786.985)(193.11842, 8345.48)(194.11795, 1372.4551)(176.31291, 20939.7)(176.11168, 396.06668)
2-Acyl-sn-glycero-3-phosphoethanolamine(N-C12:0)-PAMDB001548	0.790054	-0.192694	0.0082531	0.594994	-0.0082531	0.231184	-1.25914	-0.366661	-1.02357	-0.127357	0.135015	0.169664	2-Acyl-sn-glycero-3-phosphoethanolamine(N-C12:0)-PAMDB001548	2-Acyl-sn-glycero-3-phosphoethanolamine(N-C12:0)-PAMDB001548 [ C17 H36 N O7 P, tgt=76.15, overall=76.15 ]			(397.22305, 36834.773)(398.22534, 4548.775)(379.2018, 2916.3113)
L-Leucine-PAMDB000170	0.0830193	0.0451984	0.0893288	-0.0451984	-0.150492	-0.358952	-0.784189	0.193613	0.766443	1.71027	-21.3613	-0.112181	L-Leucine-PAMDB000170	L-Leucine-PAMDB000170 [ C6 H13 N O2, tgt=60.31, overall=60.31 ]			(114.08916, 181071.48)(115.09219, 6873.5703)(141.08818, 4431.4976)
DG(16:1(9Z)/16:0/0:0)-PAMDB003680	-2.25225	0.402766	0.0201139	-0.266416	1.67802	0.015687	0.217166	0.0192785	-0.015687	-22.9024	-4.94599	-22.9337	DG(16:1(9Z)/16:0/0:0)-PAMDB003680	DG(16:1(9Z)/16:0/0:0)-PAMDB003680 [ C35 H66 O5, tgt=42.21, overall=42.21 ]			(549.36774, 64040.945)(550.48047, 19636.568)(551.49286, 80912.83)(552.4957, 22052.607)(553.4981, 3906.565)(549.4751, 8676.65)(550.485, 1941.13)(571.5276, 543.58)(572.1679, 120156.36)(573.2536, 37213.152)(574.48206, 9298.368)(575.4905, 18642.02)(576.494, 4054.31)
PG(14:0(3-OH)/19:0cycv8c)-PAMDB004069	-0.474806	17.2681	16.9426	-0.312298	-0.585938	-0.29796	17.1279	-0.398239	-0.384954	18.2474	0.29796	0.414928	PG(14:0(3-OH)/19:0cycv8c)-PAMDB004069	PG(14:0(3-OH)/19:0cycv8c)-PAMDB004069 [ C39 H75 O11 P, tgt=17.20, overall=17.20 ]			(755.47363, 12077.844)(756.4754, 486.935)
L-Lysine_BMDB00182	0.51815	0.439945	-0.0268955	0.614761	0.276934	0.405058	-18.9289	0.0268955	-18.8499	-18.0187	-18.167	-18.05	L-Lysine_BMDB00182	L-Lysine_BMDB00182 [ C6 H14 N2 O2, tgt=43.78, overall=43.78 ]			(147.1135, 11367.844)(153.08752, 724.99426)
PS(10:0(3-OH)/16:1(9Z))-PAMDB003934	2.09644	1.62426	1.59043	0.0901251	0.0250921	-0.0250921	0.434567	-16.662	-0.0783091	-15.8175	-15.9658	-15.8488	PS(10:0(3-OH)/16:1(9Z))-PAMDB003934	PS(10:0(3-OH)/16:1(9Z))-PAMDB003934 [ C32 H58 N O11 P, tgt=19.02, overall=19.02 ]			(647.3784, 9296.894)(648.38165, 1503.8384)(651.3662, 191.76999)(647.37775, 6134.24)
PG(17:0cycw7c/14:0)-PAMDB006504	-2.02	-2.59431	-3.49277	-2.41265	0.00765324	0.386426	1.17784	1.01104	-0.00765324	2.1814	2.41417	-20.5862	PG(17:0cycw7c/14:0)-PAMDB006504	PG(17:0cycw7c/14:0)-PAMDB006504 [ C37 H71 O10 P, tgt=55.41, overall=55.41 ]			(710.82666, 34864.67)(711.74585, 13895.526)(710.50574, 8477.585)(689.4782, 7265.2114)(690.4813, 1159.1141)(727.5337, 279.725)(708.96136, 28685.34)(709.8038, 12924.553)(710.5045, 5907.2354)
PE(12:0/14:0)-PAMDB001995	-0.366112	-0.292303	-0.843826	-0.145761	-0.230135	-0.029438	0.374624	0.267141	0.029438	0.826031	1.10939	0.718037	PE(12:0/14:0)-PAMDB001995	PE(12:0/14:0)-PAMDB001995 [ C31 H62 N O8 P, tgt=90.01, overall=90.01 ]			(631.4773, 191.41)(609.4496, 197950.42)(610.45245, 63076.52)(611.4577, 12731.375)(612.46387, 847.44995)(613.47766, 7508.214)
4-Hydroxy-5-phenyltetrahydro-13-oxazin-2-one-PAMDB000939	0.843521	-0.112631	-0.00664902	0.575869	-0.00158882	0.18181	-0.715801	-0.166637	-20.1518	0.00158882	0.0342751	0.395866	4-Hydroxy-5-phenyltetrahydro-13-oxazin-2-one-PAMDB000939	4-Hydroxy-5-phenyltetrahydro-13-oxazin-2-one-PAMDB000939 [ C10 H11 N O3, tgt=58.49, overall=58.49 ]			(177.06654, 2778.89)(211.10963, 53514.824)(212.11118, 2458.3591)
Allysine_BMDB01263	0.42091	-0.141281	-0.333416	0.226442	-0.823811	0.199394	-20.0161	-0.200657	-19.9372	0.433434	0.141281	0.418238	Allysine_BMDB01263	Allysine_BMDB01263 [ C6 H11 N O3, tgt=83.41, overall=83.41 ]			(130.47147, 58976.344)(132.0743, 124151.69)(151.09322, 11307.756)(171.57129, 18589.928)(150.0523, 33961.48)(151.05498, 973.3217)
2-Acyl-sn-glycero-3-phosphoethanolamine(N-C16:0)-PAMDB001551	-0.293255	0.0121555	0.230476	-0.0121555	-0.369999	-0.0184898	0.531805	0.550869	0.663525	-17.531	-0.253689	0.692057	2-Acyl-sn-glycero-3-phosphoethanolamine(N-C16:0)-PAMDB001551	2-Acyl-sn-glycero-3-phosphoethanolamine(N-C16:0)-PAMDB001551 [ C21 H44 N O7 P, tgt=52.01, overall=52.01 ]			(478.28265, 1452.3319)(454.28378, 23480.91)(455.28653, 2741.79)(460.26144, 446648.4)(461.2642, 109118.72)(462.266, 11195.555)
L-Isoleucine_BMDB00172	0.0830193	0.0451984	0.0893288	-0.0451984	-0.150492	-0.358952	-0.784189	0.193613	0.766443	1.71027	-21.3613	-0.112181	L-Isoleucine_BMDB00172	L-Isoleucine_BMDB00172 [ C6 H13 N O2, tgt=60.31, overall=60.31 ]			(114.08916, 181071.48)(115.09219, 6873.5703)(141.08818, 4431.4976)
Alpha-D-glucose6-phosphate-PAMDB003454	-0.831249	18.568	17.8579	-0.668741	-0.942381	-0.654404	-0.82037	17.3699	17.7674	0.0897732	-0.0584831	0.058485	Alpha-D-glucose6-phosphate-PAMDB003454	Alpha-D-glucose6-phosphate-PAMDB003454 [ C6 H13 O9 P, tgt=48.78, overall=48.78 ]			(261.03217, 2155.51)(260.04822, 28408.873)(261.54883, 695.8)(262.0468, 497.13)(283.01324, 1107.245)
Acetylphosphate-PAMDB000402	2.24805	0.114616	-0.114616	1.80467	1.11981	0.231796	0.980434	-16.1777	-16.1644	-15.3333	-15.4815	-15.3646	Acetylphosphate-PAMDB000402	Acetylphosphate-PAMDB000402 [ C2 H5 O5 P, tgt=68.86, overall=68.86 ]			(139.98508, 11627.723)(140.9921, 2271.48)(125.98295, 1415.105)(142.59763, 28602.027)(160.59727, 18193.898)(162.02783, 3573.6868)(147.30757, 2025.8032)
L-Ribose-PAMDB001122	1.14695	-0.0109634	0.0109634	0.949301	-19.4507	0.938866	-1.93217	-19.263	-19.2497	0.895021	-18.5668	1.12832	L-Ribose-PAMDB001122	L-Ribose-PAMDB001122 [ C5 H10 O5, tgt=85.54, overall=85.54 ]			(150.05226, 37798.594)(151.05498, 1055.4667)(136.05898, 1450.7999)(156.039, 9080.61)
Ubiquinone-5-PAMDB004124	0.938358	-0.353918	0.357094	1.01196	0.0397682	0.356346	-20.5803	-0.65546	-20.5013	-0.120079	0.0587616	-0.0397682	Ubiquinone-5-PAMDB004124	Ubiquinone-5-PAMDB004124 [ C34 H50 O4, tgt=75.96, overall=75.96 ]			(528.35504, 108602.67)(529.3574, 23416.422)(530.3588, 3418.729)
Phosphoribosylformamidocarboxamide-PAMDB000388	-0.311672	1.39041	1.31708	-1.51583	-18.641	0.311672	-0.794149	0.87566	1.01592	-17.6088	1.77281	-0.64259	Phosphoribosylformamidocarboxamide-PAMDB000388	Phosphoribosylformamidocarboxamide-PAMDB000388 [ C10 H15 N4 O9 P, tgt=34.23, overall=34.23 ]			(370.07617, 47853.92)(371.07748, 5725.1646)(369.2757, 5482.724)(370.0773, 76360.43)(371.0786, 5853.53)(368.07556, 3654.95)(369.0778, 4228.6)
gamma-Glutamyl-L-putrescine-PAMDB000830	8.62664	8.84595	-9.8764	8.84517	8.77897	9.636	-9.53678	9.79981	-9.45781	-8.62664	-8.77489	-8.65793	gamma-Glutamyl-L-putrescine-PAMDB000830	gamma-Glutamyl-L-putrescine-PAMDB000830 [ C9 H19 N3 O3, tgt=54.21, overall=54.21 ]			(221.16064, 46658.047)(222.16331, 3811.38)(235.18077, 21587.016)(218.1704, 651.98)(224.12323, 8851.781)
Arachidonate_BMDB60102	-0.279685	-0.00561428	-0.602277	0.0827818	-22.7027	0.182963	0.00420856	0.575076	-0.00420856	-21.6706	0.712369	0.616342	Arachidonate_BMDB60102	Arachidonate_BMDB60102 [ C20 H32 O2, tgt=50.36, overall=50.36 ]			(305.24146, 20355.553)(306.24463, 1529.711)(307.255, 216.58)(322.26837, 190274.66)(323.27115, 29784.2)(324.28113, 3987.4668)(332.24957, 51979.188)
PG(10:0(3-OH)/10:0)-PAMDB004021	0.209188	0.00835228	-0.00835228	-0.578815	-0.346859	-0.116343	0.431301	-1.58292	0.0526257	1.64309	0.476877	-20.9316	PG(10:0(3-OH)/10:0)-PAMDB004021	PG(10:0(3-OH)/10:0)-PAMDB004021 [ C26 H51 O11 P, tgt=50.12, overall=50.12 ]			(571.3124, 88632.484)(572.31494, 19402.145)(573.31647, 1928.1044)(571.3136, 157763.44)(572.3162, 35471.34)(573.3176, 3750.73)(593.2928, 623.22)
PGP(18:1(9Z)/18:1(9Z))-PAMDB006286	0.237823	0.340763	0.396202	-17.1097	-0.816591	-17.0953	0.375364	-17.1956	-0.237823	1.77293	2.29083	-16.3824	PGP(18:1(9Z)/18:1(9Z))-PAMDB006286	PGP(18:1(9Z)/18:1(9Z))-PAMDB006286 [ C42 H80 O13 P2, tgt=14.27, overall=14.27 ]			(854.4841, 8967.083)(855.4868, 2426.9355)(859.4902, 22499.19)(860.4927, 9433.03)
PE(18:0/12:0)-PAMDB002019	-1.69927	-0.0794153	1.18367	0.717597	-0.854392	0.805064	0.276002	0.0794153	0.273004	-20.6448	-1.03218	-0.673415	PE(18:0/12:0)-PAMDB002019	PE(18:0/12:0)-PAMDB002019 [ C35 H70 N O8 P, tgt=43.78, overall=43.78 ]			(645.4573, 7964.4365)(647.2157, 3809.6099)(648.1481, 21578.408)(649.3221, 6082.33)(649.73926, 9805.575)(650.491, 1413.5133)(685.7494, 101760.63)(686.5282, 28892.664)(687.5378, 17243.176)(689.4795, 9203.079)(690.4827, 1454.5865)(670.64374, 4944.2065)(674.4916, 2772.29)
S-Adenosylmethionine-PAMDB000289	17.6269	17.1183	17.1903	-0.668741	16.5164	-0.654404	-0.82037	-0.754683	-0.741398	18.2056	-0.0584831	0.058485	S-Adenosylmethionine-PAMDB000289	S-Adenosylmethionine-PAMDB000289 [ C15 H23 N6 O5 S, tgt=40.81, overall=40.81 ]			(382.1395, 17261.205)(383.14246, 1379.6226)(382.1384, 11842.76)(407.1363, 3380.11)
12-Diacyl-sn-glycerol(didodecanoyln-C12:0)-PAMDB001512	-24.7253	0.340744	0.0229645	-24.5628	-0.0229645	0.993431	0.844158	0.697372	-0.728086	-23.8043	0.276978	-2.90501	12-Diacyl-sn-glycerol(didodecanoyln-C12:0)-PAMDB001512	12-Diacyl-sn-glycerol(didodecanoyln-C12:0)-PAMDB001512 [ C27H52O5, tgt= ]			(438.35776, 25755.566)(439.37024, 309537.38)(440.3734, 82465.71)(441.37546, 8168.132)(464.0378, 8303.201)(465.25726, 80497.81)(466.1015, 44950.246)(466.3883, 18752.285)
DG(18:0/16:0/0:0)-PAMDB003689	1.09805	1.46848	0.495906	-3.70233	0.241454	0.0286207	-0.284228	-0.919753	-0.0286207	-22.6704	-22.8187	1.17718	DG(18:0/16:0/0:0)-PAMDB003689	DG(18:0/16:0/0:0)-PAMDB003689 [ C37 H72 O5, tgt=27.59, overall=27.59 ]			(578.7632, 5430.3213)(579.5177, 206.53)(579.5233, 24544.1)(580.5257, 7642.96)(601.51184, 246810.42)(602.5144, 43203.957)(603.5197, 12568.613)(604.5222, 601.53)
Undecaprenyldiphosphate-PAMDB000394	-0.126179	18.6113	-0.454918	0.0363293	-0.23731	0.0506668	-0.115299	-0.049612	-0.0363274	0.794844	0.646587	0.763556	Undecaprenyldiphosphate-PAMDB000394	Undecaprenyldiphosphate-PAMDB000394 [ C55 H92 O7 P2, tgt= ]			(948.6972, 3388.27)(949.7004, 311.96)
DG(14:0(3-OH)/16:0/0:0)-PAMDB006888	-0.902259	0.895795	0.54363	-23.0001	-0.861388	0.256656	0.329837	0.308475	-0.256656	1.01697	-22.3898	-22.2728	DG(14:0(3-OH)/16:0/0:0)-PAMDB006888	DG(14:0(3-OH)/16:0/0:0)-PAMDB006888 [ C33 H64 O6, tgt=42.96, overall=42.96 ]			(558.4623, 44500.164)(559.46484, 11434.303)(563.3379, 34600.297)(563.5108, 26303.91)(576.16235, 42118.125)(577.2491, 15314.021)(577.7952, 56685.23)(578.7984, 15532.126)(579.52, 8921.222)(580.5248, 1675.07)(561.8812, 42115.707)(583.72455, 6288.5337)(585.19305, 7156.5986)(585.4797, 5223.005)(562.13043, 2626.6323)(562.4614, 3478.31)
DG(14:0/10:0/0:0)-PAMDB003649	-24.7253	0.340744	0.0229645	-24.5628	-0.0229645	0.993431	0.844158	0.697372	-0.728086	-23.8043	0.276978	-2.90501	DG(14:0/10:0/0:0)-PAMDB003649	DG(14:0/10:0/0:0)-PAMDB003649 [ C27H52O5, tgt= ]			(438.35776, 25755.566)(439.37024, 309537.38)(440.3734, 82465.71)(441.37546, 8168.132)(464.0378, 8303.201)(465.25726, 80497.81)(466.1015, 44950.246)(466.3883, 18752.285)
PG(14:0/18:1(9Z))-PAMDB006380	2.12615	0.0270386	-0.657528	0.796513	-0.927853	0.0827198	-0.334435	-0.799709	-0.0270386	0.0872555	0.787495	-0.149345	PG(14:0/18:1(9Z))-PAMDB006380	PG(14:0/18:1(9Z))-PAMDB006380 [ C38 H73 O10 P, tgt=64.39, overall=64.39 ]			(721.4924, 11758.774)(722.498, 4717.005)(723.5023, 905.73)(709.011, 80592.445)(709.5015, 62829.723)(742.20575, 43645.3)(743.5274, 982.51)(720.518, 9837.235)(721.5167, 1994.0442)(725.46686, 793.2025)
Histidinyl-Tryptophan_BMDB62241	0.541658	-0.050169	-0.0551968	-0.241617	-0.0527267	-0.146006	0.591082	-0.711826	0.22254	1.5586	0.050169	1.26888	Histidinyl-Tryptophan_BMDB62241	Histidinyl-Tryptophan_BMDB62241 [ C17 H19 N5 O3, tgt=41.29, overall=41.29 ]			(324.13562, 80872.24)(325.1382, 7866.1655)(324.13632, 132629.44)(325.13892, 13545.046)(349.13394, 1235.0701)
FR901465-PAMDB100003	18.4158	18.5688	18.8724	-0.74287	-1.01651	17.4424	18.2677	-0.828812	-0.815527	0.0156441	-0.132612	-0.0156441	FR901465-PAMDB100003	FR901465-PAMDB100003 [ C27 H41 N O9, tgt=0.35, overall=0.35 ]			(505.25668, 15030.481)(506.25943, 1785.4401)(528.24133, 1723.985)(529.2361, 1087.53)
PE(12:0/19:1(12Z))-PAMDB002002	20.5907	20.2727	-1.23412	21.1027	20.8141	21.0123	-0.894499	-0.828812	-0.815527	0.0156441	-0.132612	-0.0156441	PE(12:0/19:1(12Z))-PAMDB002002	PE(12:0/19:1(12Z))-PAMDB002002 [ C36 H70 N O8 P, tgt=68.87, overall=68.87 ]			(676.4852, 20608.34)(677.492, 6611.4424)(678.49316, 3836.665)(658.49567, 9901.596)
PS(18:1(11Z)/10:0)-PAMDB006451	1.79474	1.05255	0.380683	0.391299	-0.00874615	0.00874615	-0.187001	-1.01342	-0.34769	-18.4511	-0.568616	1.27033	PS(18:1(11Z)/10:0)-PAMDB006451	PS(18:1(11Z)/10:0)-PAMDB006451 [ C34 H64 N O10 P, tgt=53.91, overall=53.91 ]			(661.42584, 13362.39)(662.4287, 3176.4475)(663.44165, 2712.48)(664.44446, 788.2)(661.42487, 30177.045)(662.4277, 10182.8125)(663.4418, 79667.8)(664.4452, 32786.88)(665.4477, 5943.8643)(666.4501, 603.99194)(680.46594, 801.20856)(681.468, 651.15497)(685.42145, 2093.57)(686.4242, 1029.0775)(687.4268, 151.86)
4-Phosphopantothenoylcysteine-PAMDB000259	-0.480235	1.52823	1.51623	-1.55686	-18.6113	0.480235	-0.693242	1.05853	1.19356	-17.5792	1.91265	-0.612939	4-Phosphopantothenoylcysteine-PAMDB000259	4-Phosphopantothenoylcysteine-PAMDB000259 [ C12 H23 N2 O9 P S, tgt=66.76, overall=66.76 ]			(384.07526, 30517.512)(385.07562, 3931.3674)(424.1134, 590.05)(427.0669, 3113.208)
Pelargonic acid_BMDB00847	-8.99009	8.36186	8.38992	9.04864	8.64532	8.77432	-8.97921	8.06906	-8.90023	-8.06906	-8.21732	-8.10035	Pelargonic acid_BMDB00847	Pelargonic acid_BMDB00847 [ C9H18O2, tgt= ]			(141.12459, 12800.372)(184.1299, 85206.36)(185.13274, 6326.3496)(166.11935, 2982.0984)
Heptanoic acid_BMDB00666	0.538918	-0.15587	-0.0142155	0.516996	0.0260296	0.154041	-0.599262	-0.115345	-0.800512	0.0142155	-0.360573	0.0984402	Heptanoic acid_BMDB00666	Heptanoic acid_BMDB00666 [ C7 H14 O2, tgt=99.33, overall=99.33 ]			(153.08818, 126891.836)(154.09132, 6945.293)(155.10341, 287.22498)(135.0777, 44398.812)(136.0808, 2187.1077)
Pentyl butanoate_BMDB62282	-8.99009	8.36186	8.38992	9.04864	8.64532	8.77432	-8.97921	8.06906	-8.90023	-8.06906	-8.21732	-8.10035	Pentyl butanoate_BMDB62282	Pentyl butanoate_BMDB62282 [ C9H18O2, tgt= ]			(141.12459, 12800.372)(184.1299, 85206.36)(185.13274, 6326.3496)(166.11935, 2982.0984)
Geranyl-PP-PAMDB000324	0.053484	2.37337	1.65093	-0.851301	-1.77536	0.612982	-0.053484	1.33327	1.42856	-19.4434	-19.5917	-19.4747	Geranyl-PP-PAMDB000324	Geranyl-PP-PAMDB000324 [ C10 H20 O7 P2, tgt=58.45, overall=58.45 ]			(296.06073, 194702.42)(297.06326, 10851.105)(298.05905, 9161.215)(299.0618, 804.15)(321.0512, 399.495)
23-Dihydrodipicolinicacid-PAMDB000588	-18.2589	2.38493	1.43906	-18.0964	-18.3701	-18.0821	0.0171413	0.718548	-0.0171413	1.21246	3.36983	-17.3692	23-Dihydrodipicolinicacid-PAMDB000588	23-Dihydrodipicolinicacid-PAMDB000588 [ C7 H7 N O4, tgt=4.49, overall=4.49 ]			(169.03233, 68123.22)(170.03465, 2633.7349)(156.039, 2206.7)(170.0452, 1879.835)(187.0767, 43111.523)(188.0776, 9002.01)(189.0758, 5322.04)(172.32181, 2706.1548)(193.03047, 6477.807)(175.01613, 14791.561)
PG(10:0/19:iso)-PAMDB004038	1.01283	0.457102	-0.46402	0.0889015	-0.0889015	0.123531	-0.238672	-0.32605	-0.555407	0.352478	-6.49632	0.919695	PG(10:0/19:iso)-PAMDB004038	PG(10:0/19:iso)-PAMDB004038 [ C35 H69 O10 P, tgt=57.32, overall=57.32 ]			(680.467, 21973.541)(681.46985, 7583.672)(663.44257, 1494436.9)(664.4461, 666728.2)(665.44904, 152590.5)(666.4506, 14464.966)(701.3158, 5025.032)(702.14355, 7686.8325)(702.5237, 11441.658)(702.521, 10412.17)(680.9748, 11865.07)(681.4704, 7269.24)(685.4229, 51931.02)(686.426, 18087.287)(687.4276, 2276.9465)
PE(10:0(3-OH)/19:0cycv8c)-PAMDB003841	0.96989	0.408732	-0.503484	-7.5462	-0.108088	0.108088	-0.254962	-0.34072	-0.568408	0.344041	0.620467	0.91237	PE(10:0(3-OH)/19:0cycv8c)-PAMDB003841	PE(10:0(3-OH)/19:0cycv8c)-PAMDB003841 [ C34 H66 N O9 P, tgt=65.65, overall=65.65 ]			(663.4424, 1465290.9)(664.44653, 713105.25)(665.4493, 148740.23)(666.45087, 13995.807)(647.4452, 1678.61)(648.4483, 372.98)(647.4541, 16276.085)(648.4485, 11527.98)(681.47015, 7294.726)(686.42596, 18924.63)(687.42773, 2514.4688)
Pyocyanin-PAMDB100083	0.843521	-0.112631	-0.00664902	0.575869	-0.00158882	0.18181	-0.715801	-0.166637	-0.858723	0.00158882	0.0342751	0.395866	Pyocyanin-PAMDB100083	Pyocyanin-PAMDB100083 [ C13 H11 N2 O, tgt=69.16, overall=69.16 ]			(193.07965, 5093.2075)(211.10966, 51227.793)(212.11118, 2458.3591)
Coenzyme B_BMDB62554	-0.0157681	-1.01298	-0.47403	0.0157681	-0.32321	0.472376	0.061655	0.941689	1.00135	-0.269958	-0.819731	0.414148	Coenzyme B_BMDB62554	Coenzyme B_BMDB62554 [ C11 H22 N O7 P S, tgt=62.53, overall=62.53 ]			(366.1297, 1543.87)(343.11685, 45512.47)(344.11972, 3163.0212)(369.493, 18360.502)(370.41052, 44630.59)(370.87726, 30474.309)(371.57605, 5562.285)(348.06125, 1201.915)
Val-Tyr-Leu-Arg_BMDB62584	1.27043	0.0503216	0.0347729	1.33551	-0.0347729	0.619829	-1.2477	-2.00578	-1.12427	-0.108398	0.230335	-20.2581	Val-Tyr-Leu-Arg_BMDB62584	Val-Tyr-Leu-Arg_BMDB62584 [ C26 H43 N7 O6, tgt=85.99, overall=85.99 ]			(572.9835, 15986.918)(573.31635, 1742.4482)(538.3261, 3563.0828)(550.3358, 100765.42)(551.3382, 22134.729)(552.33966, 2228.262)(549.3528, 45459.13)(550.35516, 8721.3)(551.357, 826.72)
Isobutyryl-L-carnitine_BMDB00736	0.154108	3.33837	2.0275	0.00544357	-0.526747	-0.434916	-20.2883	-0.00544357	0.328871	-2.02764	2.2437	-0.366035	Isobutyryl-L-carnitine_BMDB00736	Isobutyryl-L-carnitine_BMDB00736 [ C11 H21 N O4, tgt=68.47, overall=68.47 ]			(232.15028, 107949.96)(233.44014, 10172.897)(234.1546, 679.04)(215.1433, 18177.578)(215.14255, 1024.3474)(250.1859, 2368.09)(235.1804, 4174.28)(257.1426, 7864.22)(258.1452, 364.6)(236.12132, 39593.016)(237.1244, 2522.5825)
Itaconicacid-PAMDB000440	-0.411444	1.85297	0.748863	-16.7565	-17.0302	-16.7422	0.411444	1.4046	0.684866	-15.998	0.601711	-16.0293	Itaconicacid-PAMDB000440	Itaconicacid-PAMDB000440 [ C5 H6 O4, tgt=14.34, overall=14.34 ]			(148.05727, 7093.315)(130.04692, 3535.0012)(157.02136, 122365.1)(158.02429, 3252.4648)
PGP(15:0/12:0(3-OH))-PAMDB006586	18.1451	18.8849	-1.23412	18.3538	18.1498	16.0798	-0.894499	-0.828812	-0.815527	0.0156441	-0.132612	-0.0156441	PGP(15:0/12:0(3-OH))-PAMDB006586	PGP(15:0/12:0(3-OH))-PAMDB006586 [ C33 H66 O14 P2, tgt=24.06, overall=24.06 ]			(768.4494, 534.63)(750.44, 34958.754)(751.4423, 12615.88)(752.4464, 957.52)
2-(S-Glutathionyl)acetylchloride-PAMDB000883	-0.627024	1.09431	1.09425	-1.39817	-2.25982	0.269747	-0.604427	0.698418	0.835503	-1.10213	1.53713	-0.269747	2-(S-Glutathionyl)acetylchloride-PAMDB000883	2-(S-Glutathionyl)acetylchloride-PAMDB000883 [ C12 H18 Cl N3 O7 S, tgt=30.16, overall=30.16 ]			(383.07312, 267692.94)(384.07507, 24015.17)(385.07562, 3575.5562)
Gadoleic acid_BMDB62205	0.930165	0.314155	-0.0957804	0.568036	0.0957804	0.647998	-1.79342	-0.115109	-2.43146	-1.62012	4.68002	-1.88708	Gadoleic acid_BMDB62205	Gadoleic acid_BMDB62205 [ C20 H38 O2, tgt=66.59, overall=66.59 ]			(293.2787, 20709.57)(294.2816, 1329.36)(296.2893, 17173.04)(297.2924, 335.8)(296.2899, 1247669.2)(297.29294, 232128.8)(298.30032, 27952.557)(310.3043, 73139.01)(311.30713, 15171.082)(318.2692, 1655.6799)
CDP-DG(18:1(9Z)/16:0)-PAMDB000735	-0.126179	16.4722	-0.454918	0.0363293	-0.23731	0.0506668	-0.115299	-0.049612	-0.0363274	17.6155	19.8952	17.6343	CDP-DG(18:1(9Z)/16:0)-PAMDB000735	CDP-DG(18:1(9Z)/16:0)-PAMDB000735 [ C46 H83 N3 O15 P2, tgt= ]			(979.5456, 1956.58)(997.559, 8719.345)(998.5616, 5412.7354)
PS(19:0cycv8c/14:0)-PAMDB006739	-0.831249	20.5661	18.8849	-0.668741	20.0136	-0.654404	-0.82037	-0.754683	20.9897	0.0897732	-0.0584831	0.058485	PS(19:0cycv8c/14:0)-PAMDB006739	PS(19:0cycv8c/14:0)-PAMDB006739 [ C39H72NO10P, tgt= ]			(749.5203, 111.57)(733.5068, 383.90002)(764.5353, 1277.605)(766.5192, 3104.645)(767.5165, 296.24)
Arginyl-Cysteine_BMDB62225	0.0479679	2.88123	2.89253	-18.5185	-1.66467	0.206963	-0.0479679	0.227224	2.29279	-0.629494	-17.9083	-17.7913	Arginyl-Cysteine_BMDB62225	Arginyl-Cysteine_BMDB62225 [ C9 H19 N5 O3 S, tgt=66.79, overall=66.79 ]			(259.1087, 59863.082)(260.1097, 6186.187)(282.1408, 417.65)(282.0995, 7852.45)(283.1113, 725.56)
510-dihydrophenazine-PAMDB100028	0.300631	-0.118521	-19.8245	0.328068	0.0592308	0.0218258	-0.206989	-0.0218258	-0.355631	0.368502	-0.244474	0.394573	510-dihydrophenazine-PAMDB100028	510-dihydrophenazine-PAMDB100028 [ C12 H10 N2, tgt=16.79, overall=16.79 ]			(182.08017, 2162.5615)(183.08836, 23946.502)(184.09363, 3009.1426)(210.08463, 1291.326)
Isopropylmaleate-PAMDB000832	0.753099	0.272655	0.000448227	0.661665	0.342924	-16.2279	-0.000448227	-16.3281	-16.3148	-15.4837	-15.6319	1.08876	Isopropylmaleate-PAMDB000832	Isopropylmaleate-PAMDB000832 [ C7 H10 O4, tgt=44.55, overall=44.55 ]			(179.10329, 1589.3168)(161.09277, 698.20715)(163.03548, 7966.351)
PG(18:1(9Z)/14:0(3-OH))-PAMDB004097	18.617	18.3226	-0.803545	-0.312298	18.3379	-0.29796	-0.463926	-0.398239	-0.384954	0.446217	0.29796	0.414928	PG(18:1(9Z)/14:0(3-OH))-PAMDB004097	PG(18:1(9Z)/14:0(3-OH))-PAMDB004097 [ C38 H73 O11 P, tgt=18.57, overall=18.57 ]			(720.5103, 13736.18)(721.51227, 3638.61)(755.5143, 137.47)
7-Cyano-7-carbaguanine-PAMDB001132	-0.126179	16.8894	-0.454918	0.0363293	-0.23731	0.0506668	-0.115299	-0.049612	-0.0363274	0.794844	0.646587	0.763556	7-Cyano-7-carbaguanine-PAMDB001132	7-Cyano-7-carbaguanine-PAMDB001132 [ C7 H5 N5 O, tgt=8.43, overall=8.43 ]			(162.0513, 942.15)(193.0792, 8300.97)
PG(18:1(9Z)/14:0)-PAMDB006394	2.12615	0.0270386	-0.657528	0.796513	-0.927853	0.0827198	-0.334435	-0.799709	-0.0270386	0.0872555	0.787495	-0.149345	PG(18:1(9Z)/14:0)-PAMDB006394	PG(18:1(9Z)/14:0)-PAMDB006394 [ C38 H73 O10 P, tgt=64.39, overall=64.39 ]			(721.4924, 11758.774)(722.498, 4717.005)(723.5023, 905.73)(709.011, 80592.445)(709.5015, 62829.723)(742.20575, 43645.3)(743.5274, 982.51)(720.518, 9837.235)(721.5167, 1994.0442)(725.46686, 793.2025)
PE(14:0(3-OH)/12:0)-PAMDB003867	0.410071	0.0018816	-0.409055	0.0458879	-0.0458631	-0.0018816	-0.186389	-0.518912	-0.0218897	1.0661	0.855023	1.57681	PE(14:0(3-OH)/12:0)-PAMDB003867	PE(14:0(3-OH)/12:0)-PAMDB003867 [ C31 H62 N O9 P, tgt=63.88, overall=63.88 ]			(645.4587, 16108.429)(646.46234, 3468.5117)(623.44073, 21821.123)(624.44336, 2953.585)
Betainealdehyde-PAMDB000309	0.795489	-0.810851	-0.560666	0.947957	0.697448	0.577233	-0.295085	-0.595426	-1.1081	0.573478	-0.881827	0.295085	Betainealdehyde-PAMDB000309	Betainealdehyde-PAMDB000309 [ C5 H12 N O, tgt=67.25, overall=67.25 ]			(102.089455, 50848.45)(103.09228, 1103.1646)(104.10498, 25957.37)
PS(19:iso/12:0(3-OH))-PAMDB004010	18.3603	17.7785	-0.498417	-0.00716972	-0.280809	0.00716782	-0.158798	-0.093111	-0.0798264	0.751345	18.2575	19.4585	PS(19:iso/12:0(3-OH))-PAMDB004010	PS(19:iso/12:0(3-OH))-PAMDB004010 [ C37 H70 N O11 P, tgt=12.90, overall=12.90 ]			(717.4426, 9992.516)(718.4457, 1802.875)(742.4394, 128221.2)(743.44214, 50606.258)(744.4437, 7776.2354)(745.4452, 431.9)
Propionylcarnitine_BMDB00824	-0.0428638	1.74229	0.817575	0.0428638	-0.600628	-0.754429	-0.781437	-0.155245	-0.859148	1.60368	4.30902	3.12658	Propionylcarnitine_BMDB00824	Propionylcarnitine_BMDB00824 [ C10 H19 N O4, tgt=58.95, overall=58.95 ]			(218.80267, 33052.7)(219.13744, 1879.9664)(220.00381, 1522.6171)(222.1427, 83022.76)(223.14555, 6220.803)(235.56633, 37992.223)(236.7412, 3868.2358)(218.49414, 8104.7637)(243.131, 415.26)(222.1078, 575.61)
N-Acetylglucosamine-PAMDB001956	-0.905564	2.646	2.14501	-1.01048	-0.265796	-0.439197	0.265796	-0.66368	1.5894	-0.448791	2.75064	0.687589	N-Acetylglucosamine-PAMDB001956	N-Acetylglucosamine-PAMDB001956 [ C8 H15 N O6, tgt=59.76, overall=59.76 ]			(222.49411, 2184.604)(203.07765, 1104.6799)(223.09631, 3770.7798)(204.08308, 64272.707)(205.08583, 3088.29)(239.1213, 24224.25)(240.1238, 1330.34)(224.12334, 15204.597)(225.12755, 1555.215)(244.07552, 1891.0166)(245.07199, 678.75)
PS(12:0(3-OH)/16:1(9Z))-PAMDB003952	0.459727	0.405828	-0.129275	-0.00370121	0.00370121	-0.162919	1.26707	-0.142058	1.36305	2.24987	-16.2183	-16.1013	PS(12:0(3-OH)/16:1(9Z))-PAMDB003952	PS(12:0(3-OH)/16:1(9Z))-PAMDB003952 [ C34 H62 N O11 P, tgt=36.78, overall=36.78 ]			(695.28815, 5626.224)(696.8524, 8488.441)(697.41003, 3071.434)(675.4079, 8559.44)(676.4106, 1231.4)(678.3973, 35071.055)(679.39984, 9440.193)(680.4018, 411.28)(718.3871, 2172.2834)
PG(14:0(3-OH)/18:1(9Z))-PAMDB004068	18.617	18.3226	-0.803545	-0.312298	18.3379	-0.29796	-0.463926	-0.398239	-0.384954	0.446217	0.29796	0.414928	PG(14:0(3-OH)/18:1(9Z))-PAMDB004068	PG(14:0(3-OH)/18:1(9Z))-PAMDB004068 [ C38 H73 O11 P, tgt=18.57, overall=18.57 ]			(720.5103, 13736.18)(721.51227, 3638.61)(755.5143, 137.47)
CDP-DG(16:0/18:1(9Z))-PAMDB000711	-0.126179	16.4722	-0.454918	0.0363293	-0.23731	0.0506668	-0.115299	-0.049612	-0.0363274	17.6155	19.8952	17.6343	CDP-DG(16:0/18:1(9Z))-PAMDB000711	CDP-DG(16:0/18:1(9Z))-PAMDB000711 [ C46 H83 N3 O15 P2, tgt= ]			(979.5456, 1956.58)(997.559, 8719.345)(998.5616, 5412.7354)
3-Cyano-L-alanine-PAMDB000915	-0.418877	0.54384	0.084238	-3.42522	-4.0119	-3.82263	-0.084238	0.0917778	0.235424	-3.18859	1.99502	1.31339	3-Cyano-L-alanine-PAMDB000915	3-Cyano-L-alanine-PAMDB000915 [ C4 H6 N2 O2, tgt=64.72, overall=64.72 ]			(115.0519, 22033.99)(116.057175, 854.08746)(132.0746, 545820.06)(133.07712, 17562.516)(134.0784, 1111.0425)(114.06409, 28501.55)(115.0671, 1075.7)
Hydroxyproline-PAMDB000179	8.89374	8.74601	8.0991	8.85716	8.79638	8.78294	-9.00925	-8.94356	-8.93028	-8.0991	-8.24736	-8.13039	Hydroxyproline-PAMDB000179	Hydroxyproline-PAMDB000179 [ C5 H9 N O3, tgt=47.17, overall=47.17 ]			(115.051796, 5270.5103)(149.09294, 1591.7134)(131.08243, 8206.356)
2-aminobenzoylaceticacid-PAMDB100026	18.2825	21.0283	19.7586	18.6672	-1.01651	-0.728533	-0.894499	-0.828812	-0.815527	0.0156441	20.7601	-0.0156441	2-aminobenzoylaceticacid-PAMDB100026	2-aminobenzoylaceticacid-PAMDB100026 [ C9 H9 N O3, tgt=41.98, overall=41.98 ]			(202.04347, 5334.67)(162.0514, 4337.51)(197.09326, 1319.3033)(180.0623, 91267.87)(181.06537, 7642.2935)
Pyroglutamic acid_BMDB00267	-0.126179	17.4931	-0.454918	0.0363293	-0.23731	0.0506668	-0.115299	-0.049612	-0.0363274	0.794844	0.646587	0.763556	Pyroglutamic acid_BMDB00267	Pyroglutamic acid_BMDB00267 [ C5H7NO3, tgt= ]			(130.0467, 8260.61)(132.074, 330922.7)(133.0768, 9879.41)
Porphobilinogen-PAMDB000104	11.3218	9.14777	9.47949	10.9223	10.3394	10.2239	-10.0579	-9.99223	-9.97894	-9.14777	-9.29603	-9.17906	Porphobilinogen-PAMDB000104	Porphobilinogen-PAMDB000104 [ C10 H14 N2 O4, tgt=33.06, overall=33.06 ]			(226.10017, 1587.9834)(208.09023, 69475.92)(209.09297, 4709.993)(209.09366, 958.47)
(S)-1-pyrroline-5-carboxylate-PAMDB003496	8.6681	8.59543	8.0046	8.71535	8.64251	8.61175	-8.91475	-8.84906	-8.83577	-8.0046	-8.15286	-8.03589	(S)-1-pyrroline-5-carboxylate-PAMDB003496	(S)-1-pyrroline-5-carboxylate-PAMDB003496 [ C5 H7 N O2, tgt=47.17, overall=47.17 ]			(115.051796, 5085.533)(131.08243, 7916.4434)
PGP(10:0(3-OH)/16:0)-PAMDB006536	0.00574875	0.125877	-0.442305	-0.132301	-0.00574875	-0.0215034	-0.0187798	-0.259329	0.214787	0.775621	0.396156	0.444876	PGP(10:0(3-OH)/16:0)-PAMDB006536	PGP(10:0(3-OH)/16:0)-PAMDB006536 [ C32 H64 O14 P2, tgt=42.86, overall=42.86 ]			(716.3757, 22197.717)(717.3784, 6050.2173)(718.3871, 1846.1788)
5-Aminopentanoic acid_BMDB03355	-22.4393	-0.986188	-22.768	0.60621	0.374049	0.92492	-2.04019	-0.263583	0.0364866	2.84557	-0.0364866	4.2348	5-Aminopentanoic acid_BMDB03355	5-Aminopentanoic acid_BMDB03355 [ C5H11NO2, tgt= ]			(140.0652, 5970.663)(100.0739, 189289.34)(101.0769, 6596.53)(118.0843, 682121.6)(119.08698, 28249.135)(120.088394, 1858.9141)
DG(19:0cycv8c/12:0(3-OH)/0:0)-PAMDB006856	-0.905378	24.642	-1.23412	23.8852	24.5187	23.974	-0.894499	-0.828812	23.9336	0.0156441	-0.132612	-0.0156441	DG(19:0cycv8c/12:0(3-OH)/0:0)-PAMDB006856	DG(19:0cycv8c/12:0(3-OH)/0:0)-PAMDB006856 [ C34H64O6, tgt= ]			(570.4626, 458081.47)(571.46545, 151237.45)(572.4753, 108815.555)(573.4789, 32702.625)(574.482, 3296.2825)(572.4767, 38356.11)(573.479, 12328.41)(574.4757, 2538.81)(575.4916, 82115.87)(586.4898, 3599.14)(594.86316, 4970.6396)(595.86615, 965.42596)(596.47736, 141536.0)(597.48, 45054.684)
N1-(alpha-D-ribosyl)-56-dimethyl-benzimidazole-PAMDB000805	-22.084	0.214105	0.08986	0.0362253	-0.0362253	-0.318849	-22.0731	0.0392981	0.601001	-21.163	-1.48066	1.079	N1-(alpha-D-ribosyl)-56-dimethyl-benzimidazole-PAMDB000805	N1-(alpha-D-ribosyl)-56-dimethyl-benzimidazole-PAMDB000805 [ C14H18N2O4, tgt= ]			(280.9118, 651.51996)(281.16605, 1705.175)(283.11288, 199576.88)(284.1156, 22634.467)(285.11725, 1043.724)
PG(12:0(3-OH)/16:0)-PAMDB004047	-0.393725	7.65827	-0.813796	7.30236	7.11152	7.33118	0.132567	-1.34592	-0.132567	1.2449	-17.5983	-17.4813	PG(12:0(3-OH)/16:0)-PAMDB004047	PG(12:0(3-OH)/16:0)-PAMDB004047 [ C34 H67 O11 P, tgt=35.81, overall=35.81 ]			(664.44507, 798874.7)(665.4479, 171228.62)(666.4496, 16415.838)(688.0221, 11848.971)(689.4213, 4850.6133)
67-Dimethyl-8-(1-D-ribityl)lumazine-PAMDB000524	8.60491	8.31941	8.06306	-8.51594	7.80218	-8.5016	8.14573	7.75742	-8.58859	-7.75742	-7.90568	-7.78871	67-Dimethyl-8-(1-D-ribityl)lumazine-PAMDB000524	67-Dimethyl-8-(1-D-ribityl)lumazine-PAMDB000524 [ C13 H18 N4 O6, tgt=45.84, overall=45.84 ]			(309.12015, 6185.9116)(335.118, 3242.0215)
PGP(18:1(9Z)/19:0cycv8c)-PAMDB006629	0.0870791	0.141215	-0.0913172	-0.248593	-0.0870791	-0.0979204	0.241103	-1.31724	0.506513	0.721038	-1.44143	0.151038	PGP(18:1(9Z)/19:0cycv8c)-PAMDB006629	PGP(18:1(9Z)/19:0cycv8c)-PAMDB006629 [ C43 H82 O13 P2, tgt=38.31, overall=38.31 ]			(868.50116, 33811.156)(869.5037, 12158.159)(870.505, 1823.7802)
6E-Octadecenoic acid_BMDB63572	1.12068	1.10453	-0.0868387	0.10583	0.453221	0.441457	0.000628471	-28.7171	-0.000628471	-27.8726	-28.0209	-27.9039	6E-Octadecenoic acid_BMDB63572	6E-Octadecenoic acid_BMDB63572 [ C18 H34 O2, tgt=92.28, overall=92.28 ]			(265.24823, 618703.56)(266.25113, 103802.586)(267.25403, 5969.9224)(268.2583, 30389.469)(269.26117, 4040.67)(282.27487, 1.1771028E7)(283.27762, 2574014.2)(284.28137, 257109.73)(285.28442, 12465.175)
PE(18:1(9Z)/15:0cyclo)-PAMDB006688	-1.42164	2.32591	-0.0814495	-1.57157	1.41635	-20.4727	0.885342	0.370131	1.03998	-0.00787735	0.00787735	-0.59066	PE(18:1(9Z)/15:0cyclo)-PAMDB006688	PE(18:1(9Z)/15:0cyclo)-PAMDB006688 [ C38 H72 N O8 P, tgt=53.75, overall=53.75 ]			(704.86053, 14154.704)(702.5249, 11224.06)(683.5067, 9205.15)(706.5262, 33597.215)(707.5284, 10567.863)(719.7473, 3726.9324)(725.5423, 2416.14)(701.68964, 18225.414)(702.5253, 7225.426)(709.8594, 25353.518)(710.4991, 11064.485)(710.50366, 2855.984)
5Z-hexadecenoic acid_BMDB62590	0.834272	-1.11904	0.522583	1.21881	1.0096	1.30811	-0.615374	-0.395277	-0.627205	-0.0630321	0.0630321	-0.140188	5Z-hexadecenoic acid_BMDB62590	5Z-hexadecenoic acid_BMDB62590 [ C16 H30 O2, tgt=71.54, overall=71.54 ]			(277.2119, 710736.44)(278.21484, 117515.305)(279.22162, 10447.88)(237.2165, 2614.724)(255.22687, 1764.4333)(259.2009, 36437.95)(260.20374, 3981.9187)(261.2147, 255.45)
D-Fructose-PAMDB000167	-0.00323677	2.45831	1.18019	0.200661	-19.6332	-0.349163	-1.30865	-0.313826	0.00323677	-0.229916	2.15466	0.133585	D-Fructose-PAMDB000167	D-Fructose-PAMDB000167 [ C6 H12 O6, tgt=53.01, overall=53.01 ]			(180.15381, 46548.36)(181.26663, 4698.748)(185.0746, 18681.15)(162.0514, 4337.51)(183.0983, 772.99)(208.06924, 4089.6802)
PS(14:0(3-OH)/12:0)-PAMDB003963	10.2384	9.77438	9.71506	-8.66798	8.05598	-8.65365	8.50859	-8.75393	7.90947	-7.90947	-8.05773	-7.94076	PS(14:0(3-OH)/12:0)-PAMDB003963	PS(14:0(3-OH)/12:0)-PAMDB003963 [ C32 H60 N O11 P, tgt=61.77, overall=61.77 ]			(647.37866, 10765.544)(648.38165, 1574.8334)
PS(10:0(3-OH)/19:iso)-PAMDB003938	-0.145521	-0.108856	-0.581821	-0.219355	-0.234129	-0.338436	0.389105	0.108856	0.605173	1.25394	0.43609	1.29806	PS(10:0(3-OH)/19:iso)-PAMDB003938	PS(10:0(3-OH)/19:iso)-PAMDB003938 [ C35 H66 N O11 P, tgt=47.95, overall=47.95 ]			(713.41016, 120633.625)(714.4126, 36948.496)(715.41406, 4999.241)
Benzylalcohol-PAMDB005009	-3.23619	-0.100862	0.152936	0.428958	-0.191289	0.587663	-2.87023	-0.436721	-0.569512	0.935811	0.100862	0.765052	Benzylalcohol-PAMDB005009	Benzylalcohol-PAMDB005009 [ C7 H8 O, tgt=70.45, overall=70.45 ]			(108.05815, 14284.85)(109.0574, 1552.74)(126.08885, 72559.85)(127.09186, 2552.617)
Indolylacryloylglycine_BMDB62217	0.193146	0.150673	-0.150673	0.829288	-16.833	0.623541	0.463089	0.557682	-16.632	-15.8008	-15.9491	-15.8321	Indolylacryloylglycine_BMDB62217	Indolylacryloylglycine_BMDB62217 [ C13 H12 N2 O3, tgt=46.94, overall=46.94 ]			(227.07852, 8135.866)(263.12238, 745.7114)
PE(14:0/19:0cycv8c)-PAMDB006665	0.897795	0.27956	-23.8733	2.01046	0.0375042	-0.00162315	-23.5337	-23.468	0.00162315	-22.6236	0.655966	-22.6548	PE(14:0/19:0cycv8c)-PAMDB006665	PE(14:0/19:0cycv8c)-PAMDB006665 [ C38 H74 N O8 P, tgt=78.91, overall=78.91 ]			(704.13104, 11975.259)(705.5334, 2825.9402)(685.52344, 1914.39)(686.5255, 1397.51)(706.5249, 5771.09)(689.5399, 4768.19)(703.5396, 13958.69)(704.5388, 2113.73)(708.4987, 99130.02)(709.5014, 38826.06)(710.50354, 6126.337)
3-Hydroxyanthranilicacid-PAMDB000396	17.4983	16.2188	-0.803545	-0.312298	-0.585938	-0.29796	16.7599	-0.398239	-0.384954	0.446217	0.29796	0.414928	3-Hydroxyanthranilicacid-PAMDB000396	3-Hydroxyanthranilicacid-PAMDB000396 [ C7 H7 N O3, tgt=59.27, overall=59.27 ]			(137.7107, 2658.5032)(139.04724, 688.325)(158.02393, 9129.09)
6-hydroxy-N-methylmyosmine(1+)-PAMDB100043	0.483067	-0.050456	-0.151057	-20.0002	-0.177638	-0.472882	0.424298	0.050456	0.163394	1.0589	-19.3899	0.717237	6-hydroxy-N-methylmyosmine(1+)-PAMDB100043	6-hydroxy-N-methylmyosmine(1+)-PAMDB100043 [ C10 H13 N2 O, tgt=62.58, overall=62.58 ]			(195.13443, 47115.055)(196.13754, 2971.3638)(177.12372, 1516.4556)
Se-Methylselenocysteine-PAMDB001427	16.7371	15.3421	15.0708	16.7232	15.9701	-0.728533	-0.894499	-0.828812	-0.815527	0.0156441	-0.132612	-0.0156441	Se-Methylselenocysteine-PAMDB001427	Se-Methylselenocysteine-PAMDB001427 [ C4 H9 N O2 Se, tgt=29.39, overall=29.39 ]			(181.7812, 2261.366)(158.97108, 361855.44)(160.97176, 3655.272)(169.77779, 4630.546)(169.97556, 3939.4648)(172.9865, 7888.67)(187.99704, 4922.465)(199.0204, 2429.09)(185.67851, 15301.34)(187.63196, 2970.3098)(184.95676, 2637.8901)
&alpha-&alpha--trehalose-PAMDB006373	-0.353734	0.28869	0.0426664	-1.05069	-1.41269	-0.0235109	-0.43426	0.0235109	0.180655	-0.406219	0.734988	0.262403	&alpha-&alpha--trehalose-PAMDB006373	&alpha-&alpha--trehalose-PAMDB006373 [ C12 H22 O11, tgt=63.76, overall=63.76 ]			(343.11697, 49482.45)(344.11975, 3536.9517)(325.1066, 31819.656)(326.10956, 1753.6617)(360.1428, 25569.467)(361.14584, 1400.0134)(365.09924, 786469.94)(366.10226, 86900.73)(367.10306, 12424.948)
DG(14:0(3-OH)/14:0/0:0)-PAMDB006887	3.36418	3.88203	1.9279	-19.9363	1.41888	1.06724	-1.59351	-1.34623	-1.06724	-19.1778	-19.3261	3.60536	DG(14:0(3-OH)/14:0/0:0)-PAMDB006887	DG(14:0(3-OH)/14:0/0:0)-PAMDB006887 [ C31 H60 O6, tgt=51.61, overall=51.61 ]			(530.43054, 32994.363)(531.4327, 1525.67)(535.2145, 3023.2224)(548.2526, 33058.242)(549.592, 22038.668)(550.9876, 31187.664)(551.9923, 25028.398)(551.994, 37382.93)(552.4959, 10054.16)(534.4776, 29805.453)(555.24066, 4126.0693)(556.9464, 7922.98)(557.4487, 3296.08)(534.74854, 33383.04)(536.42737, 4609.1133)
PG(10:0(3-OH)/10:0(3-OH))-PAMDB004022	0.365166	-0.0333557	0.0333557	-0.0950584	-0.0893574	0.0713348	0.323547	0.305408	0.404213	-1.9139	-19.3768	-19.2598	PG(10:0(3-OH)/10:0(3-OH))-PAMDB004022	PG(10:0(3-OH)/10:0(3-OH))-PAMDB004022 [ C26 H51 O12 P, tgt=35.99, overall=35.99 ]			(570.306, 11481.04)(571.3087, 1357.09)(586.3306, 40355.316)(587.3323, 4924.478)
PG(12:0(3-OH)/16:1(9Z))-PAMDB004048	0.904306	0.346188	-0.574421	-0.0171738	-0.195021	0.0171738	-0.342915	-0.430479	-0.659021	0.245241	0.516735	0.813459	PG(12:0(3-OH)/16:1(9Z))-PAMDB004048	PG(12:0(3-OH)/16:1(9Z))-PAMDB004048 [ C34 H65 O11 P, tgt=46.61, overall=46.61 ]			(685.4231, 53497.215)(686.42584, 18731.459)(662.4268, 630.6434)(665.1973, 788236.44)(664.445, 838546.1)(665.4479, 181437.12)(666.44965, 17845.559)(680.4672, 21475.63)(681.47, 7367.1133)
Palmitic acid_BMDB00220	0.309604	0.105292	-0.105292	0.478108	0.235332	0.481364	-0.931094	0.1853	-1.04197	-0.136395	-24.7547	-24.6377	Palmitic acid_BMDB00220	Palmitic acid_BMDB00220 [ C16 H32 O2, tgt=86.32, overall=86.32 ]			(239.23183, 1157.7214)(279.22736, 1053435.8)(280.23065, 177087.17)(281.23422, 12487.436)(261.21674, 157060.47)(262.2192, 21958.373)
Phe-Pro-Ile_BMDB62572	-21.1318	-0.50909	-0.74568	-0.18956	-0.298977	-0.39303	0.552177	0.18956	0.794455	1.50411	0.251753	1.03752	Phe-Pro-Ile_BMDB62572	Phe-Pro-Ile_BMDB62572 [ C20H29N3O4, tgt= ]			(357.20847, 121434.37)(358.21057, 7750.8545)(375.2413, 6361.128)(376.2436, 313.23502)(399.1997, 1672.6469)
PE(10:0/16:1(9Z))-PAMDB001987	0.41007	0.00188065	-0.409052	0.0458908	-0.0458641	-0.00188065	-0.186386	-0.518909	-0.0218887	1.0661	0.855022	1.57681	PE(10:0/16:1(9Z))-PAMDB001987	PE(10:0/16:1(9Z))-PAMDB001987 [ C31 H60 N O8 P, tgt=63.88, overall=63.88 ]			(590.39014, 1133.8875)(623.44073, 21821.123)(624.44336, 2953.585)
2-Keto-3-methyl-valerate-PAMDB000605	-16.8957	0.508382	0.0886431	-16.7332	-17.0069	-0.0335798	-0.407998	0.0335798	0.369721	-15.9747	0.976848	1.76532	2-Keto-3-methyl-valerate-PAMDB000605	2-Keto-3-methyl-valerate-PAMDB000605 [ C6H9O3, tgt= ]			(112.0485, 15758.03)(130.08337, 3170.6863)
PS(16:1(9Z)/12:0(3-OH))-PAMDB003992	0.459727	0.405828	-0.129275	-0.00370121	0.00370121	-0.162919	1.26707	-0.142058	1.36305	2.24987	-16.2183	-16.1013	PS(16:1(9Z)/12:0(3-OH))-PAMDB003992	PS(16:1(9Z)/12:0(3-OH))-PAMDB003992 [ C34 H62 N O11 P, tgt=36.78, overall=36.78 ]			(695.28815, 5626.224)(696.8524, 8488.441)(697.41003, 3071.434)(675.4079, 8559.44)(676.4106, 1231.4)(678.3973, 35071.055)(679.39984, 9440.193)(680.4018, 411.28)(718.3871, 2172.2834)
(1R)-Glutathionyl-(2R)-hydroxy-12-dihydronaphthalene-PAMDB000852	-0.0624332	0.261276	0.0642185	0.429466	0.0624332	0.232258	-0.0827503	-0.0632877	-0.114271	0.751776	-21.2216	-21.1046	(1R)-Glutathionyl-(2R)-hydroxy-12-dihydronaphthalene-PAMDB000852	(1R)-Glutathionyl-(2R)-hydroxy-12-dihydronaphthalene-PAMDB000852 [ C20 H25 N3 O7 S, tgt=57.85, overall=57.85 ]			(453.15933, 158951.3)(454.16187, 28751.285)(455.15927, 8373.654)
PG(10:0/14:0(3-OH))-PAMDB004037	19.0301	19.4104	18.6038	-0.312298	-0.585938	-0.29796	-0.463926	-0.398239	-0.384954	0.446217	0.29796	0.414928	PG(10:0/14:0(3-OH))-PAMDB004037	PG(10:0/14:0(3-OH))-PAMDB004037 [ C30 H59 O11 P, tgt=39.06, overall=39.06 ]			(644.42865, 4355.4)(626.4005, 12244.133)(627.4037, 495.695)(651.3652, 177.45)
Docosahexaenoic acid_BMDB02183	0.49067	0.610881	-0.170476	0.466371	0.721295	-0.0358553	-1.15618	-0.0442076	-1.22988	0.0358553	-0.0366602	0.17842	Docosahexaenoic acid_BMDB02183	Docosahexaenoic acid_BMDB02183 [ C22 H32 O2, tgt=74.51, overall=74.51 ]			(310.22998, 74565.26)(311.23248, 8170.9966)(312.2438, 1512.675)(330.25687, 4415.7515)(332.27252, 4143.5073)(352.4169, 7141.6973)(334.05966, 16713.432)(335.2307, 2441.9624)
DG(14:0/12:0/0:0)-PAMDB003650	1.94656	-0.0570612	0.00242138	1.98586	1.10804	-0.00242138	-24.2265	-0.0933123	-24.1475	-0.626142	0.00878239	0.0269175	DG(14:0/12:0/0:0)-PAMDB003650	DG(14:0/12:0/0:0)-PAMDB003650 [ C29 H56 O5, tgt=50.11, overall=50.11 ]			(484.3995, 4134.9663)(466.39096, 398421.44)(467.39505, 158832.7)(468.39706, 16669.531)(469.39618, 2325.3398)(467.401, 216944.5)(468.4048, 61902.332)(469.4079, 6116.1196)(507.3872, 110.37)(491.39923, 10773.52)(492.65567, 26691.045)(493.66638, 50125.844)(494.41873, 14238.109)
Inositol-PAMDB000062	-0.00323677	2.45831	1.18019	0.200661	-19.6332	-0.349163	-1.30865	-0.313826	0.00323677	-0.229916	2.15466	0.133585	Inositol-PAMDB000062	Inositol-PAMDB000062 [ C6 H12 O6, tgt=53.01, overall=53.01 ]			(180.15381, 46548.36)(181.26663, 4698.748)(185.0746, 18681.15)(162.0514, 4337.51)(183.0983, 772.99)(208.06924, 4089.6802)
Tetradecanoylcarnitine_BMDB05066	1.9767	1.40599	-24.1465	0.313977	0.457887	0.488942	0.0433531	-0.0433531	-0.0664282	-22.8967	-0.38054	-22.928	Tetradecanoylcarnitine_BMDB05066	Tetradecanoylcarnitine_BMDB05066 [ C21 H41 N O4, tgt=61.13, overall=61.13 ]			(371.30887, 396799.75)(372.3117, 76954.97)(373.31378, 5959.1265)(358.2998, 1092.54)(390.3402, 1386.22)(394.2934, 107765.016)(395.29886, 12323.678)(381.29202, 16150.823)
Tridecanoic acid_BMDB00910	-0.292779	0.375888	-18.7655	-18.2743	-0.299943	-0.493341	2.84762	0.850562	0.292779	1.69568	-17.664	2.10306	Tridecanoic acid_BMDB00910	Tridecanoic acid_BMDB00910 [ C13 H26 O2, tgt=66.22, overall=66.22 ]			(219.17046, 48790.883)(220.17351, 4494.338)
5'-phosphoribosyl-a-N-formylglycineamidine-PAMDB006195	0.0488939	2.3602	1.64548	-0.843413	-1.7616	0.61848	-0.0488939	1.34017	1.43248	-19.3693	-19.5176	-19.4006	5'-phosphoribosyl-a-N-formylglycineamidine-PAMDB006195	5'-phosphoribosyl-a-N-formylglycineamidine-PAMDB006195 [ C8 H16 N3 O8 P, tgt=79.85, overall=79.85 ]			(296.06097, 445823.5)(297.06345, 27517.191)(298.0594, 23462.115)(299.0618, 804.15)(321.0512, 399.495)
PG(17:0/19:0)-PAMDB001503	16.8989	16.2212	-1.15999	-0.668741	-0.942381	19.0145	-0.82037	19.2017	-0.741398	20.743	-0.0584831	0.058485	PG(17:0/19:0)-PAMDB001503	PG(17:0/19:0)-PAMDB001503 [ C42 H83 O10 P, tgt=36.40, overall=36.40 ]			(784.5827, 10124.91)(761.32495, 18663.797)(762.328, 5729.0674)(762.5826, 1660.17)(763.591, 41179.96)(764.5938, 15999.71)(765.5961, 728.35)(784.2324, 8029.904)(785.23517, 2090.22)(786.5799, 938.77)
DeltaBiliverdin-PAMDB100090	-0.905378	19.1531	-1.23412	-0.74287	19.0565	19.2024	19.4833	-0.828812	19.2545	0.0156441	-0.132612	-0.0156441	DeltaBiliverdin-PAMDB100090	DeltaBiliverdin-PAMDB100090 [ C33 H34 N4 O6, tgt=12.04, overall=12.04 ]			(582.2345, 25701.658)(583.2362, 621.97797)
L-Alloisoleucine_BMDB00557	0.0830193	0.0451984	0.0893288	-0.0451984	-0.150492	-0.358952	-0.784189	0.193613	0.766443	1.71027	-21.3613	-0.112181	L-Alloisoleucine_BMDB00557	L-Alloisoleucine_BMDB00557 [ C6 H13 N O2, tgt=60.31, overall=60.31 ]			(114.08916, 181071.48)(115.09219, 6873.5703)(141.08818, 4431.4976)
S-Adenosylmethioninamine-PAMDB000216	-9.31893	10.1689	-9.64767	-9.15642	-9.43006	9.43512	10.4825	8.42919	10.0911	11.6597	-8.54616	-8.42919	S-Adenosylmethioninamine-PAMDB000216	S-Adenosylmethioninamine-PAMDB000216 [ C14H23N6O3S, tgt= ]			(355.14676, 7754.9883)(356.14905, 278.835)(337.1536, 4005.4668)(338.14847, 10728.188)(339.15094, 930.5176)(383.14072, 650.02747)
DG(16:0/12:0/0:0)-PAMDB003668	-1.41117	-2.4348	0.0582428	-23.431	1.63198	-0.0582428	0.508856	0.12331	-0.129759	3.34768	0.642914	-1.08233	DG(16:0/12:0/0:0)-PAMDB003668	DG(16:0/12:0/0:0)-PAMDB003668 [ C31 H60 O5, tgt=45.39, overall=45.39 ]			(494.41882, 8531.014)(495.43134, 73688.05)(496.43423, 17552.883)(497.43658, 2293.38)(534.6793, 17371.271)(535.7049, 5836.862)(536.4906, 1760.7125)(535.4336, 1021.89)(518.7008, 66688.51)(519.70306, 9137.191)(519.9314, 2226.52)
Myristoleic acid_BMDB02000	0.221112	-0.0899496	-0.359456	0.186137	-0.0421095	0.171271	-0.42822	-0.10632	-0.487468	0.455951	0.0421095	0.520986	Myristoleic acid_BMDB02000	Myristoleic acid_BMDB02000 [ C14 H26 O2, tgt=82.20, overall=82.20 ]			(209.18584, 4946.0977)(212.19685, 29168.814)(213.19978, 1420.5989)(247.23799, 397644.4)(248.24089, 61228.715)(249.24359, 1560.4259)(226.21222, 37381.887)(227.21509, 2734.0833)(228.22725, 357.99667)
4-Amino-5-hydroxymethyl-2-methylpyrimidine-PAMDB000934	0.00249195	-0.132993	-0.315976	-0.00249195	-0.290721	-0.070157	0.0340853	-0.510655	0.0656157	0.900517	0.399045	0.785171	4-Amino-5-hydroxymethyl-2-methylpyrimidine-PAMDB000934	4-Amino-5-hydroxymethyl-2-methylpyrimidine-PAMDB000934 [ C6 H9 N3 O, tgt=84.42, overall=84.42 ]			(121.06263, 141137.38)(122.065834, 7880.0005)(123.0774, 189.87)(123.07735, 3407.255)(147.06221, 5261.4956)
1-Acyl-sn-glycero-3-phosphoglycerol(N-C14:0)-PAMDB001530	-16.9495	0.259866	0.0379438	-0.119613	-0.0379438	-0.0689497	2.58657	0.275252	2.65469	2.26871	-16.1767	-16.0598	1-Acyl-sn-glycero-3-phosphoglycerol(N-C14:0)-PAMDB001530	1-Acyl-sn-glycero-3-phosphoglycerol(N-C14:0)-PAMDB001530 [ C20 H40 O9 P, tgt=79.80, overall=79.80 ]			(460.25937, 63945.945)(461.26254, 16426.928)(478.2817, 5055.09)(455.2664, 12974.96)(456.269, 259.68)(460.22397, 16806.533)
4-methyl-5-nitrocatechol-PAMDB100011	-18.2589	2.38493	1.43906	-18.0964	-18.3701	-18.0821	0.0171413	0.718548	-0.0171413	1.21246	3.36983	-17.3692	4-methyl-5-nitrocatechol-PAMDB100011	4-methyl-5-nitrocatechol-PAMDB100011 [ C7 H7 N O4, tgt=4.49, overall=4.49 ]			(169.03233, 68123.22)(170.03465, 2633.7349)(156.039, 2206.7)(170.0452, 1879.835)(187.0767, 43111.523)(188.0776, 9002.01)(189.0758, 5322.04)(172.32181, 2706.1548)(193.03047, 6477.807)(175.01613, 14791.561)
11Z-hexadecenoic acid_BMDB62589	1.06343	-0.889887	0.751738	1.44796	1.23875	1.53727	-0.386219	-0.166122	-0.39805	0.166122	-23.4112	-23.2943	11Z-hexadecenoic acid_BMDB62589	11Z-hexadecenoic acid_BMDB62589 [ C16 H30 O2, tgt=71.54, overall=71.54 ]			(277.21182, 727414.4)(278.21475, 121272.6)(279.2217, 11113.942)(237.2164, 3020.3975)(255.22679, 1802.5686)(259.2008, 38912.742)(260.20364, 4394.2783)(261.2147, 255.45)
trans-12-Octadecenoic acid_BMDB62106	-28.7499	1.14826	-0.0431051	0.149564	0.496955	0.48519	0.0443621	-28.6733	0.0431051	-27.8289	-27.9771	-27.8602	trans-12-Octadecenoic acid_BMDB62106	trans-12-Octadecenoic acid_BMDB62106 [ C18 H34 O2, tgt=94.89, overall=94.89 ]			(265.24826, 595291.7)(266.25113, 99104.375)(267.25406, 5585.0283)(268.258, 26637.44)(269.2608, 3552.69)(282.27487, 1.1474183E7)(283.27762, 2479265.8)(284.28137, 246412.34)(285.28442, 11827.993)
Caproate (6:0)_BMDB61883	-0.00141716	-0.135527	-0.321266	0.00141716	-0.289625	-0.0719643	0.0340538	-0.509632	0.0649319	0.901108	0.402132	0.788616	Caproate (6:0)_BMDB61883	Caproate (6:0)_BMDB61883 [ C6 H12 O2, tgt=86.67, overall=86.67 ]			(102.089355, 730.81)(116.104576, 262.27)(121.06263, 139276.39)(122.065834, 7756.556)(123.0774, 189.87)
5-Amino-4-imidazolecarboxyamide-PAMDB000946	-0.169678	17.707	17.2997	-0.00716972	-0.280809	0.00716782	-0.158798	-0.093111	-0.0798264	0.751345	0.603088	0.720057	5-Amino-4-imidazolecarboxyamide-PAMDB000946	5-Amino-4-imidazolecarboxyamide-PAMDB000946 [ C4 H6 N4 O, tgt= ]			(126.0522, 9100.475)(112.04795, 3096.615)(130.08315, 7400.93)
D-Alanine-PAMDB000333	0.593251	-0.263701	-0.0145559	0.672793	0.223514	0.311816	-0.91915	-0.225999	-1.00128	0.0145559	-0.117753	0.140693	D-Alanine-PAMDB000333	D-Alanine-PAMDB000333 [ C3 H7 N O2, tgt=59.11, overall=59.11 ]			(107.08362, 72683.336)(108.086555, 3063.5576)
Lycopodic acid_BMDB62588	1.06343	-0.889887	0.751738	1.44796	1.23875	1.53727	-0.386219	-0.166122	-0.39805	0.166122	-23.4112	-23.2943	Lycopodic acid_BMDB62588	Lycopodic acid_BMDB62588 [ C16 H30 O2, tgt=71.54, overall=71.54 ]			(277.21182, 727414.4)(278.21475, 121272.6)(279.2217, 11113.942)(237.2164, 3020.3975)(255.22679, 1802.5686)(259.2008, 38912.742)(260.20364, 4394.2783)(261.2147, 255.45)
PE(18:0/10:0)-PAMDB002018	-0.369043	-0.58124	1.37052	0.369043	-0.494204	1.32026	1.91221	-0.512693	1.82165	1.99445	-0.912256	-0.675226	PE(18:0/10:0)-PAMDB002018	PE(18:0/10:0)-PAMDB002018 [ C33 H66 N O8 P, tgt=25.46, overall=25.46 ]			(637.4565, 12409.304)(638.4589, 2334.66)(617.4472, 397.11334)(618.4528, 634.15)(623.4411, 2905.95)(637.4559, 18717.768)(638.4582, 3263.8232)(618.4549, 832.48)(657.4936, 33481.117)(658.49695, 14109.775)(659.5071, 12951.925)(662.2645, 1349.9601)(664.4448, 383.45)(645.45776, 1540.5901)(646.4617, 320.895)
CDP-DG(10:0/12:0)-PAMDB003713	0.00378513	-0.0731688	-0.00378513	-1.11572	-0.825328	-1.28811	1.29023	-1.02395	1.36457	2.41273	0.247964	1.59346	CDP-DG(10:0/12:0)-PAMDB003713	CDP-DG(10:0/12:0)-PAMDB003713 [ C34 H61 N3 O15 P2, tgt=47.28, overall=47.28 ]			(795.34186, 26608.979)(796.3443, 7699.103)(797.3477, 1418.8934)(839.35596, 1004.05)
PGP(19:0cycv8c/17:0cycw7c)-PAMDB006639	0.237823	0.340763	0.396202	-17.1097	-0.816591	-17.0953	0.375364	-17.1956	-0.237823	1.77293	2.29083	-16.3824	PGP(19:0cycv8c/17:0cycw7c)-PAMDB006639	PGP(19:0cycv8c/17:0cycw7c)-PAMDB006639 [ C42 H80 O13 P2, tgt=14.27, overall=14.27 ]			(854.4841, 8967.083)(855.4868, 2426.9355)(859.4902, 22499.19)(860.4927, 9433.03)
(R)-Pantoate-PAMDB000865	0.269365	0.256516	-0.0997582	0.157345	-0.178732	-0.00394058	0.00394058	-17.39	0.0982056	0.840956	-16.6938	-16.5769	(R)-Pantoate-PAMDB000865	(R)-Pantoate-PAMDB000865 [ C6 H11 O4, tgt=46.19, overall=46.19 ]			(147.0622, 7527.5684)(129.0517, 1675.909)(149.09308, 769.9178)
DG(18:1(9Z)/15:0cyclo/0:0)-PAMDB006931	-2.39361	0.28745	0.0212317	1.1891	0.486894	0.274919	-0.268937	0.602189	-0.0212317	-23.6357	-23.784	-2.6432	DG(18:1(9Z)/15:0cyclo/0:0)-PAMDB006931	DG(18:1(9Z)/15:0cyclo/0:0)-PAMDB006931 [ C36 H66 O5, tgt=63.21, overall=63.21 ]			(560.4759, 7957.7197)(561.47253, 1923.4187)(563.2542, 26649.027)(564.5049, 4833.497)(565.5059, 2421.3)(578.5106, 21651.459)(579.51935, 7771.627)(602.16504, 88881.875)(603.5029, 4924.66)(585.47974, 9928.234)(586.2582, 3001.7666)(587.4854, 2672.8533)(588.48627, 912.69995)(588.4796, 332.44)
PE(12:0/16:0)-PAMDB001997	-0.369043	-0.58124	1.37052	0.369043	-0.494204	1.32026	1.91221	-0.512693	1.82165	1.99445	-0.912256	-0.675226	PE(12:0/16:0)-PAMDB001997	PE(12:0/16:0)-PAMDB001997 [ C33 H66 N O8 P, tgt=25.46, overall=25.46 ]			(637.4565, 12409.304)(638.4589, 2334.66)(617.4472, 397.11334)(618.4528, 634.15)(623.4411, 2905.95)(637.4559, 18717.768)(638.4582, 3263.8232)(618.4549, 832.48)(657.4936, 33481.117)(658.49695, 14109.775)(659.5071, 12951.925)(662.2645, 1349.9601)(664.4448, 383.45)(645.45776, 1540.5901)(646.4617, 320.895)
PE(10:0(3-OH)/12:0(3-OH))-PAMDB003832	0.5529	0.274502	-1.55726	-0.0280342	0.0280342	0.137173	0.907843	-0.959093	-0.784056	1.58807	-17.261	-17.1441	PE(10:0(3-OH)/12:0(3-OH))-PAMDB003832	PE(10:0(3-OH)/12:0(3-OH))-PAMDB003832 [ C27 H54 N O10 P, tgt=60.29, overall=60.29 ]			(583.34937, 5111.5767)(570.33984, 2584.51)(567.35223, 8632.164)(568.3548, 1652.9229)(601.3833, 3885.423)
L-Glutamyl-tRNA(Glu)-PAMDB004290	10.9491	8.87478	8.88583	9.1578	7.9498	9.2244	-8.85994	-8.79425	-8.78097	-7.9498	-8.09806	-7.98109	L-Glutamyl-tRNA(Glu)-PAMDB004290	L-Glutamyl-tRNA(Glu)-PAMDB004290 [ C5 H9 N O5, tgt=56.32, overall=56.32 ]			(181.07971, 14774.113)(182.07625, 856.95166)
PS(12:0/12:0)-PAMDB006445	0.483989	1.27981	0.239327	0.251344	-0.174436	0.151269	-0.151269	-0.231048	-0.915746	-2.09352	-21.1581	0.300076	PS(12:0/12:0)-PAMDB006445	PS(12:0/12:0)-PAMDB006445 [ C30 H58 N O10 P, tgt=94.87, overall=94.87 ]			(607.3803, 89473.66)(608.38306, 27753.93)(609.3851, 2892.27)(607.379, 101806.17)(608.38165, 32059.76)(609.3839, 3039.65)(647.44543, 875.015)
PS(14:0(3-OH)/15:0)-PAMDB003967	-0.145521	-0.108856	-0.581821	-0.219355	-0.234129	-0.338436	0.389105	0.108856	0.605173	1.25394	0.43609	1.29806	PS(14:0(3-OH)/15:0)-PAMDB003967	PS(14:0(3-OH)/15:0)-PAMDB003967 [ C35 H66 N O11 P, tgt=47.95, overall=47.95 ]			(713.41016, 120633.625)(714.4126, 36948.496)(715.41406, 4999.241)
4-chloro-35-dimethylphenol-PAMDB100060	1.011	-1.20739	-0.0182886	-17.953	-0.248784	0.270913	0.87622	0.0182886	0.289884	1.05404	-17.3428	-17.2258	4-chloro-35-dimethylphenol-PAMDB100060	4-chloro-35-dimethylphenol-PAMDB100060 [ C8 H9 Cl O, tgt=35.63, overall=35.63 ]			(177.06656, 7302.007)(181.0225, 9342.561)
Pretyrosine_BMDB62573	-0.397466	-0.439939	-0.741284	0.238677	1.17715	0.0329294	-0.127522	-0.0329294	-0.350411	0.608596	0.617051	0.636504	Pretyrosine_BMDB62573	Pretyrosine_BMDB62573 [ C10 H13 N O5, tgt=47.55, overall=47.55 ]			(227.07857, 8881.524)(235.06465, 4659.467)
CDP-DG(10:0/12:0(3-OH))-PAMDB006757	18.1503	19.9453	-1.23412	19.3711	20.352	18.2501	-0.894499	-0.828812	-0.815527	0.0156441	-0.132612	-0.0156441	CDP-DG(10:0/12:0(3-OH))-PAMDB006757	CDP-DG(10:0/12:0(3-OH))-PAMDB006757 [ C34 H61 N3 O16 P2, tgt=46.04, overall=46.04 ]			(851.38184, 160704.4)(852.38477, 71746.91)(853.3862, 13901.889)
Myristic acid_BMDB00806	0.0584621	-0.0584621	-0.418007	-2.25423	6.87227	0.167105	6.21132	-0.304983	6.23792	7.35167	-1.29484	-0.52639	Myristic acid_BMDB00806	Myristic acid_BMDB00806 [ C14 H28 O2, tgt=70.74, overall=70.74 ]			(233.2212, 1813.05)(214.2128, 470821.16)(215.2155, 43265.24)(228.22923, 1.0210576E7)(229.23203, 1797620.2)(230.23459, 122925.42)(251.44818, 96807.66)(252.19911, 11974.556)(233.63324, 7891.479)(234.18361, 2072.11)
L-Valine-PAMDB000196	-22.4393	-0.986188	-22.768	0.60621	0.374049	0.92492	-2.04019	-0.263583	0.0364866	2.84557	-0.0364866	4.2348	L-Valine-PAMDB000196	L-Valine-PAMDB000196 [ C5H11NO2, tgt= ]			(140.0652, 5970.663)(100.0739, 189289.34)(101.0769, 6596.53)(118.0843, 682121.6)(119.08698, 28249.135)(120.088394, 1858.9141)
L-Tyrosine-PAMDB000060	-0.154825	-0.146637	0.0419884	-1.079	-0.922689	0.222296	-0.955221	-0.011858	0.0543594	0.011858	0.825253	0.998066	L-Tyrosine-PAMDB000060	L-Tyrosine-PAMDB000060 [ C9 H11 N O3, tgt=62.55, overall=62.55 ]			(182.07668, 3329.9568)(166.52539, 166840.62)(167.67276, 12523.546)(167.07181, 864.63995)(184.09065, 598.59424)(166.0803, 749.67)(204.11945, 113052.49)(186.1082, 168.76)(188.0624, 246.91)
PS(18:1(11Z)/18:1(11Z))-PAMDB001469	9.49066	8.36748	8.75709	9.62824	8.78972	8.94538	-9.27763	-9.21194	-9.19865	-8.36748	-8.51574	-8.39877	PS(18:1(11Z)/18:1(11Z))-PAMDB001469	PS(18:1(11Z)/18:1(11Z))-PAMDB001469 [ C42 H78 N O10 P, tgt=15.59, overall=15.59 ]			(810.5405, 12158.715)(811.5432, 3021.5583)
trans-12-Elaidic acid_BMDB63577	0.673344	0.657192	-0.534178	-0.341509	0.00588226	-0.00588226	-0.446711	-29.1644	-0.447968	0.494982	0.14739	0.612705	trans-12-Elaidic acid_BMDB63577	trans-12-Elaidic acid_BMDB63577 [ C18 H34 O2, tgt=92.28, overall=92.28 ]			(265.2484, 593657.94)(266.2513, 98368.05)(267.25427, 5525.8926)(268.2583, 30389.469)(269.26117, 4040.67)(282.27502, 1.1418404E7)(283.27783, 2470817.2)(284.28143, 241057.31)(285.28415, 11129.535)
PE(16:0/14:0)-PAMDB000755	-1.69927	-0.0794153	1.18367	0.717597	-0.854392	0.805064	0.276002	0.0794153	0.273004	-20.6448	-1.03218	-0.673415	PE(16:0/14:0)-PAMDB000755	PE(16:0/14:0)-PAMDB000755 [ C35 H70 N O8 P, tgt=43.78, overall=43.78 ]			(645.4573, 7964.4365)(647.2157, 3809.6099)(648.1481, 21578.408)(649.3221, 6082.33)(649.73926, 9805.575)(650.491, 1413.5133)(685.7494, 101760.63)(686.5282, 28892.664)(687.5378, 17243.176)(689.4795, 9203.079)(690.4827, 1454.5865)(670.64374, 4944.2065)(674.4916, 2772.29)
5-Methyltetrahydrofolicacid-PAMDB000368	-0.110785	0.130711	0.110785	1.83317	1.65131	1.77927	-16.8864	-16.8207	-0.497517	2.31748	-16.1245	-16.0075	5-Methyltetrahydrofolicacid-PAMDB000368	5-Methyltetrahydrofolicacid-PAMDB000368 [ C20 H25 N7 O6, tgt=59.54, overall=59.54 ]			(460.1931, 1598.32)(460.19205, 5566.99)(482.17484, 18328.719)(483.17758, 2983.6558)
FR901464-PAMDB100004	0.0849037	-0.44219	-0.368063	0.0959034	-0.0849037	-0.251255	0.16593	0.554453	0.403975	1.67151	-17.588	-17.471	FR901464-PAMDB100004	FR901464-PAMDB100004 [ C27 H41 N O8, tgt=30.60, overall=30.60 ]			(490.27008, 18684.652)(491.27277, 2961.2551)
DG(12:0(3-OH)/18:1(9Z)/0:0)-PAMDB006876	-0.944182	0.753087	0.352559	-1.90112	0.0266409	-0.0266409	0.203818	0.102592	0.0489626	-25.293	-6.90235	-25.3243	DG(12:0(3-OH)/18:1(9Z)/0:0)-PAMDB006876	DG(12:0(3-OH)/18:1(9Z)/0:0)-PAMDB006876 [ C33 H62 O6, tgt=49.95, overall=49.95 ]			(577.43335, 233386.86)(578.4362, 70085.41)(579.43854, 9365.79)(580.4394, 592.51)(572.7798, 554152.9)(573.7827, 193154.11)(574.78595, 44227.535)(578.5127, 48242.2)(558.46173, 28225.06)(559.46454, 7072.246)(560.4626, 4307.07)(561.4662, 703.0)(563.4522, 1318.4067)(560.4932, 10180.23)
PE(14:0(3-OH)/17:0cycw7c)-PAMDB003875	-22.339	0.649372	0.0782738	0.654217	-0.055069	-22.1621	-22.3281	-0.372396	-0.493036	0.314081	0.168108	0.055069	PE(14:0(3-OH)/17:0cycw7c)-PAMDB003875	PE(14:0(3-OH)/17:0cycw7c)-PAMDB003875 [ C36H70NO9P, tgt= ]			(694.48126, 269.27)(675.4837, 1745.582)(674.4916, 1835.49)(709.51447, 27347.695)(710.51685, 5663.1885)
PS(10:0(3-OH)/19:0cycv8c)-PAMDB003937	0.446651	0.0849552	0.0247421	-0.2211	-0.0247421	-0.42104	0.941576	-0.623127	0.687801	2.06125	-17.1213	-17.0044	PS(10:0(3-OH)/19:0cycv8c)-PAMDB003937	PS(10:0(3-OH)/19:0cycv8c)-PAMDB003937 [ C35 H64 N O11 P, tgt=55.17, overall=55.17 ]			(688.41785, 16205.315)(689.4205, 4153.374)
PE(10:0(3-OH)/12:0)-PAMDB003831	0.0886583	-0.184545	-0.699069	-0.22725	-0.325126	-0.0886583	0.324327	0.207549	0.388785	1.03809	-0.316974	0.75862	PE(10:0(3-OH)/12:0)-PAMDB003831	PE(10:0(3-OH)/12:0)-PAMDB003831 [ C27 H54 N O9 P, tgt=67.20, overall=67.20 ]			(567.35284, 16445.752)(568.3554, 2997.4004)
PE(15:0/10:0)-PAMDB002007	0.738096	0.21044	-0.305777	0.0356903	0.00383377	-0.00383377	-0.215229	-0.506731	-21.8897	-21.0585	0.351511	0.597399	PE(15:0/10:0)-PAMDB002007	PE(15:0/10:0)-PAMDB002007 [ C30 H60 N O8 P, tgt=59.17, overall=59.17 ]			(596.4083, 1010.2234)(615.19385, 31998.938)(616.3203, 12699.73)(616.4442, 10477.79)(593.43054, 52437.484)(594.4328, 9661.235)(599.38116, 188514.28)(600.38385, 49149.7)(601.38525, 5579.99)
PE(12:0/18:0)-PAMDB002000	-1.69927	-0.0794153	1.18367	0.717597	-0.854392	0.805064	0.276002	0.0794153	0.273004	-20.6448	-1.03218	-0.673415	PE(12:0/18:0)-PAMDB002000	PE(12:0/18:0)-PAMDB002000 [ C35 H70 N O8 P, tgt=43.78, overall=43.78 ]			(645.4573, 7964.4365)(647.2157, 3809.6099)(648.1481, 21578.408)(649.3221, 6082.33)(649.73926, 9805.575)(650.491, 1413.5133)(685.7494, 101760.63)(686.5282, 28892.664)(687.5378, 17243.176)(689.4795, 9203.079)(690.4827, 1454.5865)(670.64374, 4944.2065)(674.4916, 2772.29)
Tetracosapentaenoic acid (24:5n-6)_BMDB06322	20.0022	18.6298	19.5233	-0.668741	-0.942381	19.1663	-0.82037	-0.754683	-0.741398	0.0897732	-0.0584831	0.058485	Tetracosapentaenoic acid (24:5n-6)_BMDB06322	Tetracosapentaenoic acid (24:5n-6)_BMDB06322 [ C24 H38 O2, tgt=30.76, overall=30.76 ]			(362.2903, 5927.7573)(340.27542, 6101.035)
L-Allothreonine-PAMDB001426	-0.254191	-0.255809	-0.384063	0.469695	0.00612164	0.143296	-0.00303364	0.00303364	-0.168256	0.901908	-2.79163	0.742696	L-Allothreonine-PAMDB001426	L-Allothreonine-PAMDB001426 [ C4 H9 N O3, tgt=64.58, overall=64.58 ]			(121.0624, 322.93)(103.05218, 8519.207)(104.05967, 5757.23)(119.0835, 552784.5)(120.08655, 36794.79)(124.0377, 47870.55)(125.0403, 862.67)
DG(19:0cycv8c/16:1(9Z)/0:0)-PAMDB006939	-0.526121	21.1834	-0.85486	-0.363613	-0.637253	19.0354	21.6374	-0.449554	-0.43627	20.781	18.9143	0.363613	DG(19:0cycv8c/16:1(9Z)/0:0)-PAMDB006939	DG(19:0cycv8c/16:1(9Z)/0:0)-PAMDB006939 [ C38H70O5, tgt= ]			(590.76526, 3634.715)(591.5223, 2709.22)(613.51605, 54516.02)(614.51855, 15647.3545)(615.52576, 6234.0225)(615.5256, 4791.99)(616.5288, 264.99)
PS(14:0/17:0)-PAMDB001452	2.21965	0.114093	-0.00625706	-0.51747	-1.2925	0.00625706	-0.77422	-0.658393	-0.872119	0.744126	0.0367098	0.682336	PS(14:0/17:0)-PAMDB001452	PS(14:0/17:0)-PAMDB001452 [ C37 H72 N O10 P, tgt=96.38, overall=96.38 ]			(721.99194, 14192.987)(722.99615, 4160.909)(723.5023, 952.57)(708.49884, 170094.36)(709.50165, 67099.81)(710.5036, 11058.983)(743.43994, 21651.373)(744.53394, 6849.307)
DG(17:0cycw7c/18:1(9Z)/0:0)-PAMDB006927	-0.526121	21.1834	-0.85486	-0.363613	-0.637253	19.0354	21.6374	-0.449554	-0.43627	20.781	18.9143	0.363613	DG(17:0cycw7c/18:1(9Z)/0:0)-PAMDB006927	DG(17:0cycw7c/18:1(9Z)/0:0)-PAMDB006927 [ C38H70O5, tgt= ]			(590.76526, 3634.715)(591.5223, 2709.22)(613.51605, 54516.02)(614.51855, 15647.3545)(615.52576, 6234.0225)(615.5256, 4791.99)(616.5288, 264.99)
Glycerol3-phosphate-PAMDB000049	0.00381565	-0.240186	-0.206889	-0.366996	0.0539389	0.0168867	-0.00381565	-0.0103292	-0.060914	0.873414	1.23075	0.0127459	Glycerol3-phosphate-PAMDB000049	Glycerol3-phosphate-PAMDB000049 [ C3 H9 O6 P, tgt=47.82, overall=47.82 ]			(172.01434, 15180.831)(173.02118, 739.916)(156.007, 613.472)(173.02129, 4585.8315)(172.0366, 34.56)
DG(18:0/16:1(9Z)/0:0)-PAMDB003690	0.541729	0.0660953	-0.32855	-0.0319977	0.0319977	0.125782	-20.5274	0.125782	-20.4484	0.564198	-19.7655	-0.174486	DG(18:0/16:1(9Z)/0:0)-PAMDB003690	DG(18:0/16:1(9Z)/0:0)-PAMDB003690 [ C37 H70 O5, tgt=86.88, overall=86.88 ]			(595.5277, 3053.7446)(578.30383, 1318.0701)(617.51105, 60465.168)(618.51355, 17875.205)(619.5129, 1998.7067)(601.00995, 15267.578)(601.5102, 4220.9062)(603.52246, 593.6367)
PE(16:1(9Z)/10:0)-PAMDB002014	0.41007	0.00188065	-0.409052	0.0458908	-0.0458641	-0.00188065	-0.186386	-0.518909	-0.0218887	1.0661	0.855022	1.57681	PE(16:1(9Z)/10:0)-PAMDB002014	PE(16:1(9Z)/10:0)-PAMDB002014 [ C31 H60 N O8 P, tgt=63.88, overall=63.88 ]			(590.39014, 1133.8875)(623.44073, 21821.123)(624.44336, 2953.585)
Decarboxy-SAM-PAMDB001159	0.0191345	-0.0191345	-0.176748	-1.03531	-18.71	-0.896814	0.224867	0.655798	-0.346542	1.44523	0.0783348	0.621126	Decarboxy-SAM-PAMDB001159	Decarboxy-SAM-PAMDB001159 [ C14 H24 N6 O3 S, tgt=47.61, overall=47.61 ]			(359.167, 2453.28)(338.1485, 20694.781)(339.1511, 1529.0056)(378.1974, 1986.2)(384.61, 4745.037)(380.1474, 3471.13)
Sorbitol-6-phosphate-PAMDB000371	1.02466	2.89538	1.72887	0.232448	-0.232448	-17.6812	-17.8472	1.32622	1.49911	-16.937	-17.0853	-16.9683	Sorbitol-6-phosphate-PAMDB000371	Sorbitol-6-phosphate-PAMDB000371 [ C6 H15 O9 P, tgt=43.01, overall=43.01 ]			(262.0467, 623.6275)(280.08676, 54385.887)(281.0895, 3379.3176)(289.04153, 1812.4166)
10Z-Heptadecenoic acid_BMDB60038	0.263473	0.0517702	-0.206351	0.414559	0.221183	0.447019	-1.05185	-0.0517702	-1.16733	-0.189544	-0.19604	0.172925	10Z-Heptadecenoic acid_BMDB60038	10Z-Heptadecenoic acid_BMDB60038 [ C17 H32 O2, tgt=82.32, overall=82.32 ]			(251.2326, 146877.42)(252.23497, 20315.803)(294.23788, 241067.7)(295.2405, 37312.05)(296.25262, 6449375.0)(276.22656, 2927.3826)(278.24194, 30331.344)
Phosphonoacetate-PAMDB001843	2.24805	0.114616	-0.114616	1.80467	1.11981	0.231796	0.980434	-16.1777	-16.1644	-15.3333	-15.4815	-15.3646	Phosphonoacetate-PAMDB001843	Phosphonoacetate-PAMDB001843 [ C2 H5 O5 P, tgt=68.86, overall=68.86 ]			(139.98508, 11627.723)(140.9921, 2271.48)(125.98295, 1415.105)(142.59763, 28602.027)(160.59727, 18193.898)(162.02783, 3573.6868)(147.30757, 2025.8032)
Lysyl-Glycine_BMDB62248	0.953643	0.674378	0.483504	1.14574	0.839473	0.955703	-19.6756	-0.483504	-19.5967	-18.7655	-18.9137	-18.7968	Lysyl-Glycine_BMDB62248	Lysyl-Glycine_BMDB62248 [ C8 H17 N3 O3, tgt=86.43, overall=86.43 ]			(204.1333, 529.8825)(221.16061, 56787.223)(222.16335, 4409.736)
PG(12:0(3-OH)/19:0cycv8c)-PAMDB004051	-18.3893	0.978498	0.279579	-18.2268	0.447626	-18.2124	-0.0324745	-18.3127	-0.0208435	0.0208435	2.01193	2.27475	PG(12:0(3-OH)/19:0cycv8c)-PAMDB004051	PG(12:0(3-OH)/19:0cycv8c)-PAMDB004051 [ C37H71O11P, tgt= ]			(710.5056, 12672.59)(740.8437, 9775.251)(741.5098, 2281.21)(722.4947, 11281.624)(723.495, 3279.91)(731.4679, 2540.3525)(732.4699, 1166.96)
N-oleoyl glutamine_BMDB62569	-0.0365467	4.11151	4.23327	-20.1701	5.41775	-20.1557	0.0365467	2.80374	2.57675	-19.4115	-19.5598	-0.413439	N-oleoyl glutamine_BMDB62569	N-oleoyl glutamine_BMDB62569 [ C23 H42 N2 O4, tgt=61.06, overall=61.06 ]			(410.32526, 21900.191)(397.322, 15728.29)(397.3231, 21679.514)(398.32605, 2672.5542)(429.69482, 620.18335)(410.83273, 158294.9)(412.3417, 66601.39)(413.3436, 12382.105)
p-Cresol-PAMDB001747	-20.6775	-0.100862	0.152936	0.428958	-0.191289	0.587663	-20.6666	-0.436721	-0.569512	0.935811	0.100862	0.765052	p-Cresol-PAMDB001747	p-Cresol-PAMDB001747 [ C7H8O, tgt= ]			(126.08885, 72559.85)(127.09186, 2552.617)
DG(12:0/19:iso/0:0)-PAMDB006883	-0.17334	-0.647467	0.10918	-22.4331	0.512587	-22.4187	0.604517	0.482235	0.737989	0.648199	-21.8228	-0.10918	DG(12:0/19:iso/0:0)-PAMDB006883	DG(12:0/19:iso/0:0)-PAMDB006883 [ C34 H66 O5, tgt=38.91, overall=38.91 ]			(560.4917, 9887.47)(536.77356, 9512.443)(537.4958, 15556.68)(538.5, 1154.36)(561.505, 3919.11)(537.477, 31336.234)(538.48047, 9161.668)(577.4933, 12653.38)(578.4958, 370.78)(559.6863, 16320.871)(560.7129, 6448.615)(561.60736, 919.5829)
PGP(10:0/10:0)-PAMDB006398	2.0567	0.257997	-0.47134	1.96282	2.54684	-1.79638	-0.059906	0.477156	-0.305426	-17.4662	0.059906	-17.4975	PGP(10:0/10:0)-PAMDB006398	PGP(10:0/10:0)-PAMDB006398 [ C26 H52 O13 P2, tgt=89.84, overall=89.84 ]			(659.2765, 461746.06)(660.2792, 145660.17)(661.28076, 19751.91)(662.2817, 1553.3467)(621.2972, 13415.411)(622.2997, 3034.0698)(637.29376, 2361018.5)(638.29724, 817040.4)(639.2999, 161590.02)(640.30133, 15722.276)(653.5228, 85174.516)(654.52155, 257181.97)(655.5238, 70017.516)(656.32495, 10347.566)(657.3213, 710.19)(637.29565, 1916830.6)(638.29926, 664997.4)(639.30145, 120033.81)(640.30273, 10199.…
DG(10:0/12:0(3-OH)/0:0)-PAMDB006866	2.19089	1.06815	0.501209	0.376354	0.244299	-0.106964	-19.7362	-0.868938	-19.6572	-0.624733	-0.24164	0.106964	DG(10:0/12:0(3-OH)/0:0)-PAMDB006866	DG(10:0/12:0(3-OH)/0:0)-PAMDB006866 [ C25 H48 O6, tgt=72.90, overall=72.90 ]			(430.3561, 2513.39)(446.35153, 31842.682)(447.35446, 5359.525)(465.38434, 33761.863)(466.38712, 7741.7705)(467.40045, 110003.836)(468.40317, 25476.773)(446.3508, 42675.82)(447.3538, 8096.65)(451.3299, 2951.312)(452.3326, 114.06)(445.11923, 5845.5874)(446.56723, 910.9181)
Ubiquinol-5-PAMDB001972	0.294288	-0.0977736	0.278832	-18.568	-0.759877	0.0977736	0.239957	-18.6539	-0.138373	1.58558	0.594247	-17.8408	Ubiquinol-5-PAMDB001972	Ubiquinol-5-PAMDB001972 [ C34 H52 O4, tgt=57.88, overall=57.88 ]			(527.28876, 21331.178)(528.8464, 32090.492)(529.40295, 10196.779)(530.405, 287.08)(542.42175, 25324.777)(543.4237, 1129.2975)
O-Succinyl-L-homoserine_BMDB62570	0.239781	0.0355558	0.077239	-0.757695	-0.433637	-0.0355558	0.927968	-19.6382	0.476703	1.96264	-18.942	-18.8251	O-Succinyl-L-homoserine_BMDB62570	O-Succinyl-L-homoserine_BMDB62570 [ C8 H13 N O6, tgt=83.24, overall=83.24 ]			(237.10783, 43447.375)(238.11067, 2766.5154)
C20:1 c5_BMDB62553	0.930165	0.314155	-0.0957804	0.568036	0.0957804	0.647998	-1.79342	-0.115109	-2.43146	-1.62012	4.68002	-1.88708	C20:1 c5_BMDB62553	C20:1 c5_BMDB62553 [ C20 H38 O2, tgt=66.59, overall=66.59 ]			(293.2787, 20709.57)(294.2816, 1329.36)(296.2893, 17173.04)(297.2924, 335.8)(296.2899, 1247669.2)(297.29294, 232128.8)(298.30032, 27952.557)(310.3043, 73139.01)(311.30713, 15171.082)(318.2692, 1655.6799)
45-Dihydrooroticacid-PAMDB000147	-0.0606337	0.134929	-0.375785	0.0963335	-0.459064	0.0606337	0.159867	-0.68679	0.0796041	0.843757	-17.553	-17.4361	45-Dihydrooroticacid-PAMDB000147	45-Dihydrooroticacid-PAMDB000147 [ C5 H6 N2 O4, tgt=45.46, overall=45.46 ]			(177.06653, 8029.3125)(181.02249, 11176.341)
PS(22:6(4Z7Z10Z13Z16Z19Z)/18:2(9Z12Z))-PAMDB006274	0.631373	0.686179	0.743455	-16.4422	-0.228215	-16.4279	0.748557	-16.5282	0.228215	2.13541	-15.832	-15.715	PS(22:6(4Z7Z10Z13Z16Z19Z)/18:2(9Z12Z))-PAMDB006274	PS(22:6(4Z7Z10Z13Z16Z19Z)/18:2(9Z12Z))-PAMDB006274 [ C46 H74 N O10 P, tgt=15.79, overall=15.79 ]			(854.4841, 8832.338)(855.4868, 2403.1912)
PS(10:0(3-OH)/17:0cycw7c)-PAMDB003935	-0.255841	-0.645038	-1.01435	-0.651956	-0.753209	-0.932342	0.48903	0.255841	0.569871	0.258786	1.37655	0.281997	PS(10:0(3-OH)/17:0cycw7c)-PAMDB003935	PS(10:0(3-OH)/17:0cycw7c)-PAMDB003935 [ C33 H60 N O11 P, tgt=68.29, overall=68.29 ]			(678.3961, 33588.227)(679.3988, 8820.237)(680.4018, 267.33)(682.3519, 83191.055)(683.3544, 22854.072)(684.3562, 1643.3717)
Pimeloyl-[acyl-carrierprotein]-PAMDB004402	-0.443278	0.989938	1.24381	-16.6672	-16.9409	0.443278	-16.8189	0.998233	1.33156	-15.9087	2.03177	-15.94	Pimeloyl-[acyl-carrierprotein]-PAMDB004402	Pimeloyl-[acyl-carrierprotein]-PAMDB004402 [ C6 H5 N O3, tgt=47.62, overall=47.62 ]			(143.0345, 397.14)(141.03682, 5547.547)(142.0385, 1707.86)(159.0657, 626.17)(140.05373, 3481.4082)(163.02191, 3827.335)
Eicosapentaenoic acid_BMDB01999	0.608973	-0.204019	-0.310195	0.564277	0.145982	0.210547	-0.0823088	-0.0588446	-0.106338	-0.104434	0.735274	0.0588446	Eicosapentaenoic acid_BMDB01999	Eicosapentaenoic acid_BMDB01999 [ C20 H30 O2, tgt=50.09, overall=50.09 ]			(307.67365, 998.1557)(286.23096, 574.68994)(320.2507, 2436857.2)(321.25394, 447284.97)(322.256, 33679.438)(308.21005, 1162.2118)
gamma-Glutamyl-Se-methylselenocysteine-PAMDB000803	-0.126179	17.0393	-0.454918	0.0363293	-0.23731	0.0506668	-0.115299	-0.049612	-0.0363274	0.794844	0.646587	0.763556	gamma-Glutamyl-Se-methylselenocysteine-PAMDB000803	gamma-Glutamyl-Se-methylselenocysteine-PAMDB000803 [ C9 H16 N2 O5 Se, tgt= ]			(292.0199, 8332.56)(326.0241, 2154.62)
PS(14:0/14:0(3-OH))-PAMDB003977	-1.33434	-1.77509	-2.12159	-0.164362	0.0563793	-0.126736	1.00172	-0.0563793	1.12494	1.86458	0.899292	1.42838	PS(14:0/14:0(3-OH))-PAMDB003977	PS(14:0/14:0(3-OH))-PAMDB003977 [ C34 H64 N O11 P, tgt=55.18, overall=55.18 ]			(675.40894, 8799.613)(676.4118, 1155.71)(696.4681, 680.57)(699.39417, 54369.95)(700.39655, 14441.943)(701.39886, 2146.505)
2-Octenedioic acid_BMDB00341	-16.88	0.0355072	-0.0355072	0.665453	0.347778	0.868301	-0.261356	0.0679016	-16.7901	-15.9589	-16.1072	4.01367	2-Octenedioic acid_BMDB00341	2-Octenedioic acid_BMDB00341 [ C8H12O4, tgt= ]			(173.0755, 15434.29)(194.11348, 1598.7286)(177.0512, 9911.26)
Betaine_BMDB00043	-22.4393	-0.986188	-22.768	0.60621	0.374049	0.92492	-2.04019	-0.263583	0.0364866	2.84557	-0.0364866	4.2348	Betaine_BMDB00043	Betaine_BMDB00043 [ C5H11NO2, tgt= ]			(140.0652, 5970.663)(100.0739, 189289.34)(101.0769, 6596.53)(118.0843, 682121.6)(119.08698, 28249.135)(120.088394, 1858.9141)
PE(16:1(9Z)/14:0(3-OH))-PAMDB003897	0.669246	-0.562436	-0.0661993	0.767516	-0.0490198	0.0490198	-0.474324	-0.474256	-20.5669	0.342788	0.217937	0.46161	PE(16:1(9Z)/14:0(3-OH))-PAMDB003897	PE(16:1(9Z)/14:0(3-OH))-PAMDB003897 [ C35 H68 N O9 P, tgt=69.51, overall=69.51 ]			(678.46674, 25124.46)(679.469, 6413.2886)
Selenohomocysteine-PAMDB001428	16.7371	15.3421	15.0708	16.7232	15.9701	-0.728533	-0.894499	-0.828812	-0.815527	0.0156441	-0.132612	-0.0156441	Selenohomocysteine-PAMDB001428	Selenohomocysteine-PAMDB001428 [ C4 H9 N O2 Se, tgt=29.39, overall=29.39 ]			(181.7812, 2261.366)(158.97108, 361855.44)(160.97176, 3655.272)(169.77779, 4630.546)(169.97556, 3939.4648)(172.9865, 7888.67)(187.99704, 4922.465)(199.0204, 2429.09)(185.67851, 15301.34)(187.63196, 2970.3098)(184.95676, 2637.8901)
CDP-DG(18:0/16:1(9Z))-PAMDB003764	-0.126179	16.4722	-0.454918	0.0363293	-0.23731	0.0506668	-0.115299	-0.049612	-0.0363274	17.6155	19.8952	17.6343	CDP-DG(18:0/16:1(9Z))-PAMDB003764	CDP-DG(18:0/16:1(9Z))-PAMDB003764 [ C46 H83 N3 O15 P2, tgt= ]			(979.5456, 1956.58)(997.559, 8719.345)(998.5616, 5412.7354)
Retinol-PAMDB002050	0.186648	0.13272	-0.346347	0.422437	0.286273	0.43546	-1.35023	0.0413408	-5.94642	-4.81822	-0.565909	-0.0413408	Retinol-PAMDB002050	Retinol-PAMDB002050 [ C20 H30 O, tgt=85.17, overall=85.17 ]			(268.22287, 892502.2)(269.22577, 134919.3)(270.22897, 8736.711)(289.2516, 23465.63)(290.2537, 1044.43)(306.2733, 7265.03)(286.24872, 178.785)(310.31662, 4875.1084)(313.72897, 933.6967)(314.22604, 1470.14)(291.62616, 98026.914)(292.3611, 21264.793)(293.21844, 1073.9149)
L-Glutamine_BMDB00641	0.141857	0.391394	0.421642	0.48315	-0.141857	0.396551	-16.6314	0.609003	-16.5524	-15.7212	-15.8695	-15.7525	L-Glutamine_BMDB00641	L-Glutamine_BMDB00641 [ C5 H10 N2 O3, tgt=42.65, overall=42.65 ]			(128.05914, 4739.607)(147.0777, 3490.75)(129.4963, 11196.64)(133.0766, 1303.51)
Heptadecanoic acid_BMDB02259	0.30055	-0.0630779	-0.223017	0.36594	0.0736389	0.403433	-1.19814	0.0630779	0.481794	-0.382641	-18.7456	-18.6286	Heptadecanoic acid_BMDB02259	Heptadecanoic acid_BMDB02259 [ C17 H34 O2, tgt=98.99, overall=98.99 ]			(253.2469, 1082.905)(256.2605, 7844102.5)(257.2631, 1641677.0)(258.2659, 137139.61)(296.25354, 5551562.0)(297.25684, 1057812.6)(298.26004, 100282.19)(277.5452, 5033.028)(278.6903, 39817.203)(280.25763, 229927.31)
PGP(12:0/14:0(3-OH))-PAMDB006562	0.00574875	0.125877	-0.442305	-0.132301	-0.00574875	-0.0215034	-0.0187798	-0.259329	0.214787	0.775621	0.396156	0.444876	PGP(12:0/14:0(3-OH))-PAMDB006562	PGP(12:0/14:0(3-OH))-PAMDB006562 [ C32 H64 O14 P2, tgt=42.86, overall=42.86 ]			(716.3757, 22197.717)(717.3784, 6050.2173)(718.3871, 1846.1788)
DG(16:0/16:1(9Z)/0:0)-PAMDB003672	-2.25225	0.402766	0.0201139	-0.266416	1.67802	0.015687	0.217166	0.0192785	-0.015687	-22.9024	-4.94599	-22.9337	DG(16:0/16:1(9Z)/0:0)-PAMDB003672	DG(16:0/16:1(9Z)/0:0)-PAMDB003672 [ C35 H66 O5, tgt=42.21, overall=42.21 ]			(549.36774, 64040.945)(550.48047, 19636.568)(551.49286, 80912.83)(552.4957, 22052.607)(553.4981, 3906.565)(549.4751, 8676.65)(550.485, 1941.13)(571.5276, 543.58)(572.1679, 120156.36)(573.2536, 37213.152)(574.48206, 9298.368)(575.4905, 18642.02)(576.494, 4054.31)
DG(18:1(9Z)/10:0/0:0)-PAMDB003694	2.60795	0.9677	-0.157878	-0.141501	-24.3026	0.19019	-0.867475	-0.665381	-0.361556	0.141501	1.27944	2.34624	DG(18:1(9Z)/10:0/0:0)-PAMDB003694	DG(18:1(9Z)/10:0/0:0)-PAMDB003694 [ C31 H58 O5, tgt=69.35, overall=69.35 ]			(493.0103, 19566.178)(494.41818, 7336.7983)(495.4309, 43930.562)(496.4337, 10123.756)(493.41595, 53151.586)(494.4187, 12790.67)(533.6142, 44962.742)(534.5312, 9084.183)(535.43066, 5245.125)(515.40405, 356943.78)(516.4068, 103701.9)(517.40674, 23579.373)(518.4065, 5046.676)
N-Acetyl-D-glucosamine-PAMDB000088	-0.905564	2.646	2.14501	-1.01048	-0.265796	-0.439197	0.265796	-0.66368	1.5894	-0.448791	2.75064	0.687589	N-Acetyl-D-glucosamine-PAMDB000088	N-Acetyl-D-glucosamine-PAMDB000088 [ C8 H15 N O6, tgt=59.76, overall=59.76 ]			(222.49411, 2184.604)(203.07765, 1104.6799)(223.09631, 3770.7798)(204.08308, 64272.707)(205.08583, 3088.29)(239.1213, 24224.25)(240.1238, 1330.34)(224.12334, 15204.597)(225.12755, 1555.215)(244.07552, 1891.0166)(245.07199, 678.75)
PG(14:0(3-OH)/17:0cycw7c)-PAMDB004067	-18.3893	0.978498	0.279579	-18.2268	0.447626	-18.2124	-0.0324745	-18.3127	-0.0208435	0.0208435	2.01193	2.27475	PG(14:0(3-OH)/17:0cycw7c)-PAMDB004067	PG(14:0(3-OH)/17:0cycw7c)-PAMDB004067 [ C37H71O11P, tgt= ]			(710.5056, 12672.59)(740.8437, 9775.251)(741.5098, 2281.21)(722.4947, 11281.624)(723.495, 3279.91)(731.4679, 2540.3525)(732.4699, 1166.96)
PG(16:1(9Z)/10:0(3-OH))-PAMDB004087	21.6268	20.7692	18.2635	-0.74287	18.3686	-0.728533	17.0653	-0.828812	-0.815527	0.0156441	-0.132612	-0.0156441	PG(16:1(9Z)/10:0(3-OH))-PAMDB004087	PG(16:1(9Z)/10:0(3-OH))-PAMDB004087 [ C32 H61 O11 P, tgt=42.37, overall=42.37 ]			(652.3975, 7806.77)(653.4003, 1171.6)(653.4277, 16754.762)(654.4307, 4757.097)(655.4335, 338.53)
Ubiquinone-2-PAMDB001975	-0.846893	17.9948	-1.17563	-0.684385	17.7027	17.8511	-0.836014	-0.770327	18.0665	0.0741291	-0.0741272	18.9425	Ubiquinone-2-PAMDB001975	Ubiquinone-2-PAMDB001975 [ C19H26O4, tgt= ]			(300.57605, 19813.367)(301.1775, 1805.97)(339.9831, 4907.5703)(324.1637, 123.66)
PE(18:0/14:0)-PAMDB006234	-11.0977	10.1767	11.4179	11.5571	-11.2088	10.8785	-11.0868	-11.0211	10.6185	-10.1767	10.3239	-10.208	PE(18:0/14:0)-PAMDB006234	PE(18:0/14:0)-PAMDB006234 [ C37H74NO8P, tgt= ]			(673.51624, 26012.566)(674.5182, 8066.6704)(711.8759, 41645.133)(712.94666, 18091.287)(713.9546, 7386.042)(715.5714, 63182.734)(694.5498, 1642.21)(696.5608, 175.2)(716.50854, 9567.63)(717.51135, 3436.386)(700.2653, 1713.84)(701.2659, 2896.375)(701.5156, 5353.02)
PGP(10:0/12:0(3-OH))-PAMDB006543	0.349423	-0.127257	3.33642	3.55506	-0.400006	-0.339084	-0.746964	3.11344	-0.976924	-0.290065	2.44031	0.127257	PGP(10:0/12:0(3-OH))-PAMDB006543	PGP(10:0/12:0(3-OH))-PAMDB006543 [ C28 H56 O14 P2, tgt=88.93, overall=88.93 ]			(682.351, 70946.56)(683.35345, 19622.76)(684.3554, 1520.641)
5-Aminoimidazoleribonucleotide-PAMDB000306	0.0486832	2.36457	1.64845	-0.843624	-1.76181	0.621964	-0.0486832	1.34432	1.439	-19.3695	-19.5178	-19.4008	5-Aminoimidazoleribonucleotide-PAMDB000306	5-Aminoimidazoleribonucleotide-PAMDB000306 [ C8 H14 N3 O7 P, tgt=79.85, overall=79.85 ]			(321.0512, 399.495)(296.06097, 445823.5)(297.06345, 27517.191)(298.0594, 23462.115)(299.0618, 804.15)
Queuine-PAMDB000403	-0.247442	2.58582	2.42303	-1.45182	-19.0876	-0.0884476	-0.343378	-0.0681858	0.0681858	1.42021	0.900888	1.35891	Queuine-PAMDB000403	Queuine-PAMDB000403 [ C12 H15 N5 O3, tgt=58.77, overall=58.77 ]			(259.1086, 52501.785)(260.10965, 5488.424)(277.13654, 38162.73)(278.1393, 3019.7864)
DG(12:0(3-OH)/12:0(3-OH)/0:0)-PAMDB006869	2.35807	0.476734	1.62126	2.3365	1.3618	1.56034	-22.1502	-0.476734	-22.0712	-0.928055	-21.3883	-21.2713	DG(12:0(3-OH)/12:0(3-OH)/0:0)-PAMDB006869	DG(12:0(3-OH)/12:0(3-OH)/0:0)-PAMDB006869 [ C27 H52 O7, tgt=79.83, overall=79.83 ]			(488.37302, 110702.875)(489.37537, 24200.713)(490.37808, 2291.246)
Trehalose-PAMDB000214	-0.353734	0.28869	0.0426664	-1.05069	-1.41269	-0.0235109	-0.43426	0.0235109	0.180655	-0.406219	0.734988	0.262403	Trehalose-PAMDB000214	Trehalose-PAMDB000214 [ C12 H22 O11, tgt=63.76, overall=63.76 ]			(343.11697, 49482.45)(344.11975, 3536.9517)(325.1066, 31819.656)(326.10956, 1753.6617)(360.1428, 25569.467)(361.14584, 1400.0134)(365.09924, 786469.94)(366.10226, 86900.73)(367.10306, 12424.948)
L-Homoserine_BMDB00719	-0.254191	-0.255809	-0.384063	0.469695	0.00612164	0.143296	-0.00303364	0.00303364	-0.168256	0.901908	-2.79163	0.742696	L-Homoserine_BMDB00719	L-Homoserine_BMDB00719 [ C4 H9 N O3, tgt=64.58, overall=64.58 ]			(121.0624, 322.93)(103.05218, 8519.207)(104.05967, 5757.23)(119.0835, 552784.5)(120.08655, 36794.79)(124.0377, 47870.55)(125.0403, 862.67)
2-Aminomalonatesemialdehyde-PAMDB001562	-0.00259686	-0.139831	-0.323411	0.00259686	-0.284995	-0.0733633	0.0398645	-0.520761	0.0680456	0.91546	0.385026	0.78892	2-Aminomalonatesemialdehyde-PAMDB001562	2-Aminomalonatesemialdehyde-PAMDB001562 [ C3 H5 N O3, tgt=63.71, overall=63.71 ]			(121.06263, 143630.02)(122.065834, 8048.2065)(123.0774, 197.17)(103.052284, 25543.662)(104.058136, 1576.4652)
PE(16:0/10:0(3-OH))-PAMDB003891	0.410071	0.0018816	-0.409055	0.0458879	-0.0458631	-0.0018816	-0.186389	-0.518912	-0.0218897	1.0661	0.855023	1.57681	PE(16:0/10:0(3-OH))-PAMDB003891	PE(16:0/10:0(3-OH))-PAMDB003891 [ C31 H62 N O9 P, tgt=63.88, overall=63.88 ]			(645.4587, 16108.429)(646.46234, 3468.5117)(623.44073, 21821.123)(624.44336, 2953.585)
L-Glutamicacid5-phosphate-PAMDB000304	17.3576	17.1676	-0.498417	-0.00716972	-0.280809	0.00716782	-0.158798	-0.093111	-0.0798264	0.751345	0.603088	0.720057	L-Glutamicacid5-phosphate-PAMDB000304	L-Glutamicacid5-phosphate-PAMDB000304 [ C5 H10 N O7 P, tgt=23.21, overall=23.21 ]			(250.01294, 353.79498)(232.00061, 12037.96)
2-hydroxy-6-oxo-24-heptadienoicacid-PAMDB100024	0.231766	1.03428	0.928104	1.26189	0.726034	-0.668926	-17.805	-17.7393	-17.726	1.82073	-0.231766	-16.9261	2-hydroxy-6-oxo-24-heptadienoicacid-PAMDB100024	2-hydroxy-6-oxo-24-heptadienoicacid-PAMDB100024 [ C7 H8 O4, tgt=46.25, overall=46.25 ]			(156.03893, 37932.05)(157.04187, 1002.80664)(158.03703, 1387.8766)(141.03683, 5951.1763)(142.0385, 1839.24)(157.06789, 16405.77)(158.06935, 2184.6174)(162.02783, 3466.2703)(163.024, 4067.905)
3-Methyl-2-oxovalericacid-PAMDB000141	-0.75788	1.14189	0.45328	-17.4313	-17.7049	-0.56725	-0.45328	-0.466252	0.568702	0.68263	0.934354	1.22944	3-Methyl-2-oxovalericacid-PAMDB000141	3-Methyl-2-oxovalericacid-PAMDB000141 [ C6 H10 O3, tgt=77.30, overall=77.30 ]			(112.0485, 14707.5)(132.07455, 461963.44)(133.07709, 14255.346)(134.0784, 646.1725)(114.06407, 29485.88)(115.8456, 2888.848)(130.08334, 3531.4102)(154.0548, 214.25)(137.75058, 23386.955)(138.55368, 29724.71)(139.055, 5639.88)
PG(12:0(3-OH)/10:0(3-OH))-PAMDB004040	0.11751	-0.115898	-17.0528	-16.5615	-16.8351	0.115898	1.3415	0.569086	0.884825	1.92093	-15.9513	-15.8343	PG(12:0(3-OH)/10:0(3-OH))-PAMDB004040	PG(12:0(3-OH)/10:0(3-OH))-PAMDB004040 [ C28 H55 O12 P, tgt=19.22, overall=19.22 ]			(597.32635, 10092.124)(598.7618, 1231.7728)(601.3574, 773.37)
Asparaginyl-Methionine_BMDB62226	0.557162	0.257064	-0.00217724	0.259574	-0.0448275	0.19819	0.00217724	-0.524997	-0.0255423	0.677127	-16.8169	-16.6999	Asparaginyl-Methionine_BMDB62226	Asparaginyl-Methionine_BMDB62226 [ C9 H17 N3 O4 S, tgt=75.31, overall=75.31 ]			(263.0863, 7289.289)(265.1018, 8507.832)(267.11813, 141209.75)(268.12085, 13269.013)
Leu-Leu-Tyr_BMDB62564	-0.441244	-0.678635	-1.09336	-0.538696	-0.753058	-0.289568	0.338945	0.484337	0.289568	1.00504	0.596746	1.15316	Leu-Leu-Tyr_BMDB62564	Leu-Leu-Tyr_BMDB62564 [ C21 H33 N3 O5, tgt=58.38, overall=58.38 ]			(427.2716, 8342.441)(428.27414, 1241.6646)(430.23636, 701343.44)(431.23926, 141801.67)(432.24072, 15412.882)(433.2435, 598.32)
Adenosinemonophosphate-PAMDB000014	-0.360306	0.505995	0.216459	-1.04093	-1.40062	-0.0503254	-0.514534	0.0503254	0.232958	-0.186691	0.840239	0.120518	Adenosinemonophosphate-PAMDB000014	Adenosinemonophosphate-PAMDB000014 [ C10 H14 N5 O7 P, tgt=86.08, overall=86.08 ]			(348.06125, 1282.86)(335.06656, 1028.8058)(365.09924, 840037.75)(366.10226, 93274.25)(367.10306, 13454.661)
(R)-(2-chloro-5-oxo-25-dihydro-2-furyl)aceticacid-PAMDB100031	10.1623	9.72395	9.01834	-8.79713	-9.07077	-8.7828	-8.94876	-8.88307	9.87507	-8.03862	11.2759	8.03862	(R)-(2-chloro-5-oxo-25-dihydro-2-furyl)aceticacid-PAMDB100031	(R)-(2-chloro-5-oxo-25-dihydro-2-furyl)aceticacid-PAMDB100031 [ C6 H5 Cl O4, tgt=38.79, overall=38.79 ]			(159.9701, 26365.44)(159.9864, 193.94)(199.0215, 1306.03)(200.96915, 1545.5725)(182.95892, 10980.6)
PGP(15:0cyclo/14:0)-PAMDB006593	0.0645399	-0.17957	0.0573702	-0.68661	-0.451365	-0.0573702	0.274156	-1.68452	-0.103795	2.66428	2.39872	2.66908	PGP(15:0cyclo/14:0)-PAMDB006593	PGP(15:0cyclo/14:0)-PAMDB006593 [ C35 H68 O13 P2, tgt=22.07, overall=22.07 ]			(740.4187, 22074.164)(741.42114, 6112.148)(759.4202, 32605.764)(760.4213, 14873.804)(776.43866, 1191.1866)(765.4096, 7334.0767)
Ubiquinone-1-PAMDB001833	-0.831249	19.6636	19.3345	20.3121	20.0003	-0.654404	-0.82037	-0.754683	-0.741398	0.0897732	-0.0584831	0.058485	Ubiquinone-1-PAMDB001833	Ubiquinone-1-PAMDB001833 [ C14H18O4, tgt= ]			(238.13612, 44915.99)(250.13669, 101721.47)(251.13942, 7882.2744)
3-Carbamoyl-2-phenylpropionaldehyde-PAMDB000914	0.843521	-0.112631	-0.00664902	0.575869	-0.00158882	0.18181	-0.715801	-0.166637	-20.1518	0.00158882	0.0342751	0.395866	3-Carbamoyl-2-phenylpropionaldehyde-PAMDB000914	3-Carbamoyl-2-phenylpropionaldehyde-PAMDB000914 [ C10 H11 N O3, tgt=58.49, overall=58.49 ]			(177.06654, 2778.89)(211.10963, 53514.824)(212.11118, 2458.3591)
PS(14:0(3-OH)/14:0)-PAMDB003965	-1.33434	-1.77509	-2.12159	-0.164362	0.0563793	-0.126736	1.00172	-0.0563793	1.12494	1.86458	0.899292	1.42838	PS(14:0(3-OH)/14:0)-PAMDB003965	PS(14:0(3-OH)/14:0)-PAMDB003965 [ C34 H64 N O11 P, tgt=55.18, overall=55.18 ]			(675.40894, 8799.613)(676.4118, 1155.71)(696.4681, 680.57)(699.39417, 54369.95)(700.39655, 14441.943)(701.39886, 2146.505)
5-amino-6-(D-ribitylamino)uracil-PAMDB003406	-0.250268	1.57523	2.72072	-0.539845	-22.4249	0.456122	0.250268	0.469665	0.603276	-21.3927	-21.541	-21.424	5-amino-6-(D-ribitylamino)uracil-PAMDB003406	5-amino-6-(D-ribitylamino)uracil-PAMDB003406 [ C9 H16 N4 O6, tgt=43.40, overall=43.40 ]			(259.10855, 38583.664)(260.1096, 3821.525)(281.84033, 1507.54)
10E-heptadecenoic acid_BMDB62591	0.38413	0.172427	-0.0856943	0.535216	0.34184	0.567676	-0.931193	0.0688868	-1.04668	-0.0688868	-21.4678	-21.3508	10E-heptadecenoic acid_BMDB62591	10E-heptadecenoic acid_BMDB62591 [ C17 H32 O2, tgt=82.32, overall=82.32 ]			(251.23254, 156802.31)(252.2349, 21870.592)(294.23776, 241534.33)(295.24042, 37499.992)(296.25262, 6449375.0)(276.2265, 3235.4167)(278.24194, 30331.344)
Leucyl-Aspartate_BMDB62244	0.627274	-0.0808201	0.53491	1.2461	0.198486	0.47506	-16.43	0.0808201	-16.3511	-15.5199	-15.6681	-15.5512	Leucyl-Aspartate_BMDB62244	Leucyl-Aspartate_BMDB62244 [ C10 H18 N2 O5, tgt=17.23, overall=17.23 ]			(229.1187, 5378.235)(264.15167, 7656.1953)(255.11523, 8701.536)
PA(16:0/16:0)-PAMDB000169	1.29324	1.52343	-0.116812	-21.6178	0.70504	-0.251015	0.315365	0.189936	0.116812	-20.8593	-4.0646	-3.61706	PA(16:0/16:0)-PAMDB000169	PA(16:0/16:0)-PAMDB000169 [ C35 H69 O8 P, tgt=48.85, overall=48.85 ]			(648.4536, 1296.0)(631.48016, 90313.62)(632.4827, 26876.992)(633.48505, 2153.5032)(631.47955, 239171.3)(632.4823, 78072.62)(633.4843, 10974.581)(650.5217, 6808.15)(651.5245, 2078.73)(673.4656, 2340.92)(674.4689, 1685.68)(654.7968, 7016.0767)(655.4596, 2327.2349)
PE(16:0/19:0cycw8c)-PAMDB002013	1.04047	-0.0517855	-19.3575	2.91319	-19.1399	2.44374	0.0517855	0.594821	1.68628	-18.1078	-18.256	-0.353911	PE(16:0/19:0cycw8c)-PAMDB002013	PE(16:0/19:0cycw8c)-PAMDB002013 [ C41 H80 N O8 P, tgt=67.53, overall=67.53 ]			(729.56146, 2830.2083)(730.5794, 6882.9604)(731.7709, 9812.174)(732.77185, 3027.182)(733.775, 5994.422)(734.55927, 10877.85)(766.603, 17587.688)(764.59283, 13102.83)(765.5956, 2043.81)(746.55444, 8258.693)(747.5569, 1428.0549)
PS(14:0/14:1(9Z))-PAMDB006257	1.79474	1.05255	0.380683	0.391299	-0.00874615	0.00874615	-0.187001	-1.01342	-0.34769	-18.4511	-0.568616	1.27033	PS(14:0/14:1(9Z))-PAMDB006257	PS(14:0/14:1(9Z))-PAMDB006257 [ C34 H64 N O10 P, tgt=53.91, overall=53.91 ]			(661.42584, 13362.39)(662.4287, 3176.4475)(663.44165, 2712.48)(664.44446, 788.2)(661.42487, 30177.045)(662.4277, 10182.8125)(663.4418, 79667.8)(664.4452, 32786.88)(665.4477, 5943.8643)(666.4501, 603.99194)(680.46594, 801.20856)(681.468, 651.15497)(685.42145, 2093.57)(686.4242, 1029.0775)(687.4268, 151.86)
PE(14:0/16:0)-PAMDB000752	-1.69927	-0.0794153	1.18367	0.717597	-0.854392	0.805064	0.276002	0.0794153	0.273004	-20.6448	-1.03218	-0.673415	PE(14:0/16:0)-PAMDB000752	PE(14:0/16:0)-PAMDB000752 [ C35 H70 N O8 P, tgt=43.78, overall=43.78 ]			(645.4573, 7964.4365)(647.2157, 3809.6099)(648.1481, 21578.408)(649.3221, 6082.33)(649.73926, 9805.575)(650.491, 1413.5133)(685.7494, 101760.63)(686.5282, 28892.664)(687.5378, 17243.176)(689.4795, 9203.079)(690.4827, 1454.5865)(670.64374, 4944.2065)(674.4916, 2772.29)
Pro-Pro-Phe_BMDB62575	8.22911	10.4352	8.14738	-8.87461	-9.14825	-8.86027	9.02982	-8.96055	8.4835	10.2342	-8.26435	-8.14738	Pro-Pro-Phe_BMDB62575	Pro-Pro-Phe_BMDB62575 [ C19 H25 N3 O4, tgt=47.61, overall=47.61 ]			(341.16824, 8681.608)(342.17108, 452.22)(387.18872, 5376.0283)
L-Tyrosine_BMDB00158	-0.154825	-0.146637	0.0419884	-1.079	-0.922689	0.222296	-0.955221	-0.011858	0.0543594	0.011858	0.825253	0.998066	L-Tyrosine_BMDB00158	L-Tyrosine_BMDB00158 [ C9 H11 N O3, tgt=62.55, overall=62.55 ]			(182.07668, 3329.9568)(166.52539, 166840.62)(167.67276, 12523.546)(167.07181, 864.63995)(184.09065, 598.59424)(166.0803, 749.67)(204.11945, 113052.49)(186.1082, 168.76)(188.0624, 246.91)
Elaidic acid_BMDB00573	0.673344	0.657192	-0.534178	-0.341509	0.00588226	-0.00588226	-0.446711	-29.1644	-0.447968	0.494982	0.14739	0.612705	Elaidic acid_BMDB00573	Elaidic acid_BMDB00573 [ C18 H34 O2, tgt=92.28, overall=92.28 ]			(265.2484, 593657.94)(266.2513, 98368.05)(267.25427, 5525.8926)(268.2583, 30389.469)(269.26117, 4040.67)(282.27502, 1.1418404E7)(283.27783, 2470817.2)(284.28143, 241057.31)(285.28415, 11129.535)
1-Acyl-sn-glycero-3-phosphoglycerol(N-C12:0)-PAMDB001529	0.282161	0.251435	0.128066	-0.243054	-0.128066	-0.324666	1.13242	-0.91829	0.940795	2.06566	-18.6277	-18.5107	1-Acyl-sn-glycero-3-phosphoglycerol(N-C12:0)-PAMDB001529	1-Acyl-sn-glycero-3-phosphoglycerol(N-C12:0)-PAMDB001529 [ C18 H36 O9 P, tgt=75.83, overall=75.83 ]			(446.24316, 307.99832)(432.2286, 30511.068)(432.19345, 41957.797)
DG(14:0/19:0cycv8c/0:0)-PAMDB006895	20.7785	21.8488	20.4135	-0.74287	20.2716	19.7577	-0.894499	-0.828812	-0.815527	0.0156441	-0.132612	-0.0156441	DG(14:0/19:0cycv8c/0:0)-PAMDB006895	DG(14:0/19:0cycv8c/0:0)-PAMDB006895 [ C36 H68 O5, tgt=54.87, overall=54.87 ]			(563.4905, 79.22)(564.5221, 1957.71)(580.5247, 7599.29)(604.51636, 2258.4668)(586.49255, 53613.688)(587.4952, 15057.898)(588.49677, 1683.4349)
PE(10:0/12:0(3-OH))-PAMDB003844	0.0886583	-0.184545	-0.699069	-0.22725	-0.325126	-0.0886583	0.324327	0.207549	0.388785	1.03809	-0.316974	0.75862	PE(10:0/12:0(3-OH))-PAMDB003844	PE(10:0/12:0(3-OH))-PAMDB003844 [ C27 H54 N O9 P, tgt=67.20, overall=67.20 ]			(567.35284, 16445.752)(568.3554, 2997.4004)
2-Octaprenyl-6-methoxyphenol-PAMDB000621	-22.5532	-0.623181	2.06699	-22.3907	-22.6644	2.55141	1.72507	2.24572	2.11905	-21.6322	0.623181	-21.6635	2-Octaprenyl-6-methoxyphenol-PAMDB000621	2-Octaprenyl-6-methoxyphenol-PAMDB000621 [ C47H72O2, tgt= ]			(668.56616, 64245.77)(669.56824, 21176.52)(670.5731, 9347.233)(650.5228, 7603.77)(651.5269, 2366.34)(654.55554, 109669.984)(655.55817, 37809.652)(656.5704, 110101.445)(657.57355, 35266.145)(686.60583, 5674.46)(669.57886, 98964.14)(670.5814, 32967.59)(672.5922, 4806.83)(695.89844, 3203.4834)(697.2316, 629.13336)(673.8582, 22261.135)(674.86017, 6635.795)
137-trimethyl-5-hydroxyisouricacid-PAMDB100023	-8.88114	7.9914	-9.20988	8.67002	9.6085	8.46427	8.30382	-8.80457	-8.79129	9.03994	-8.10837	-7.9914	137-trimethyl-5-hydroxyisouricacid-PAMDB100023	137-trimethyl-5-hydroxyisouricacid-PAMDB100023 [ C8H10N4O4, tgt= ]			(227.07835, 9960.131)(235.06435, 5014.77)
2-Acyl-sn-glycero-3-phosphoglycerol(N-C14:0)-PAMDB001556	-16.9495	0.259866	0.0379438	-0.119613	-0.0379438	-0.0689497	2.58657	0.275252	2.65469	2.26871	-16.1767	-16.0598	2-Acyl-sn-glycero-3-phosphoglycerol(N-C14:0)-PAMDB001556	2-Acyl-sn-glycero-3-phosphoglycerol(N-C14:0)-PAMDB001556 [ C20 H40 O9 P, tgt=79.80, overall=79.80 ]			(460.25937, 63945.945)(461.26254, 16426.928)(478.2817, 5055.09)(455.2664, 12974.96)(456.269, 259.68)(460.22397, 16806.533)
PS(19:0cycv8c/12:0(3-OH))-PAMDB004004	18.1236	17.5362	-0.498417	-0.00716972	-0.280809	0.00716782	-0.158798	-0.093111	-0.0798264	0.751345	0.603088	0.720057	PS(19:0cycv8c/12:0(3-OH))-PAMDB004004	PS(19:0cycv8c/12:0(3-OH))-PAMDB004004 [ C37 H68 N O11 P, tgt=38.03, overall=38.03 ]			(717.4426, 9497.175)(718.4457, 1713.0901)
cis-12-Octadecenoic acid_BMDB62098	1.12068	1.10453	-0.0868387	0.10583	0.453221	0.441457	0.000628471	-28.7171	-0.000628471	-27.8726	-28.0209	-27.9039	cis-12-Octadecenoic acid_BMDB62098	cis-12-Octadecenoic acid_BMDB62098 [ C18 H34 O2, tgt=92.28, overall=92.28 ]			(265.24823, 618703.56)(266.25113, 103802.586)(267.25403, 5969.9224)(268.2583, 30389.469)(269.26117, 4040.67)(282.27487, 1.1771028E7)(283.27762, 2574014.2)(284.28137, 257109.73)(285.28442, 12465.175)
PE(16:0/12:0)-PAMDB002011	-0.369043	-0.58124	1.37052	0.369043	-0.494204	1.32026	1.91221	-0.512693	1.82165	1.99445	-0.912256	-0.675226	PE(16:0/12:0)-PAMDB002011	PE(16:0/12:0)-PAMDB002011 [ C33 H66 N O8 P, tgt=25.46, overall=25.46 ]			(637.4565, 12409.304)(638.4589, 2334.66)(617.4472, 397.11334)(618.4528, 634.15)(623.4411, 2905.95)(637.4559, 18717.768)(638.4582, 3263.8232)(618.4549, 832.48)(657.4936, 33481.117)(658.49695, 14109.775)(659.5071, 12951.925)(662.2645, 1349.9601)(664.4448, 383.45)(645.45776, 1540.5901)(646.4617, 320.895)
a-Ketoisovalericacid-PAMDB000004	0.578176	-0.0414915	-0.303435	0.268743	0.0414915	0.34308	-0.130694	0.550149	-0.238072	1.34336	-19.7096	-19.5926	a-Ketoisovalericacid-PAMDB000004	a-Ketoisovalericacid-PAMDB000004 [ C5 H8 O3, tgt=85.37, overall=85.37 ]			(121.0625, 6292.51)(121.02596, 56507.2)
PG(16:0/14:0(3-OH))-PAMDB004085	-17.2728	0.970858	0.476515	-17.1103	-17.3839	-17.096	-17.2619	-0.14105	0.14105	1.47311	1.07257	1.88773	PG(16:0/14:0(3-OH))-PAMDB004085	PG(16:0/14:0(3-OH))-PAMDB004085 [ C36H71O11P, tgt= ]			(694.4801, 252.81)(699.5013, 6275.69)(733.5179, 2757.89)(711.3514, 6983.5747)(712.49585, 965.435)
PE(15:0cyclo/14:0(3-OH))-PAMDB003889	0.96989	0.408732	-0.503484	-7.5462	-0.108088	0.108088	-0.254962	-0.34072	-0.568408	0.344041	0.620467	0.91237	PE(15:0cyclo/14:0(3-OH))-PAMDB003889	PE(15:0cyclo/14:0(3-OH))-PAMDB003889 [ C34 H66 N O9 P, tgt=65.65, overall=65.65 ]			(663.4424, 1465290.9)(664.44653, 713105.25)(665.4493, 148740.23)(666.45087, 13995.807)(647.4452, 1678.61)(648.4483, 372.98)(647.4541, 16276.085)(648.4485, 11527.98)(681.47015, 7294.726)(686.42596, 18924.63)(687.42773, 2514.4688)
Fructose6-phosphate-PAMDB000047	-0.831249	18.568	17.8579	-0.668741	-0.942381	-0.654404	-0.82037	17.3699	17.7674	0.0897732	-0.0584831	0.058485	Fructose6-phosphate-PAMDB000047	Fructose6-phosphate-PAMDB000047 [ C6 H13 O9 P, tgt=48.78, overall=48.78 ]			(261.03217, 2155.51)(260.04822, 28408.873)(261.54883, 695.8)(262.0468, 497.13)(283.01324, 1107.245)
Carnitine-PAMDB000023	-0.509236	1.26291	0.294797	-0.479737	-1.26545	0.00245953	-0.444768	0.0272017	-0.579839	-0.00245953	1.67189	0.675241	Carnitine-PAMDB000023	Carnitine-PAMDB000023 [ C7 H16 N O3, tgt=56.10, overall=56.10 ]			(162.10973, 111214.63)(163.11263, 4394.148)(144.09886, 15857.809)(145.10214, 955.48004)(164.1241, 1206.19)(146.11443, 2689.829)(186.1082, 251.26)
beta-D-ribofuranose-PAMDB001172	2.11852	0.960606	0.982533	1.92087	-18.4791	1.91043	-0.960606	-18.2914	-18.2781	2.11447	-17.5952	-17.4782	beta-D-ribofuranose-PAMDB001172	beta-D-ribofuranose-PAMDB001172 [ C5 H10 O5, tgt=85.54, overall=85.54 ]			(150.05225, 35843.414)(151.0549, 1085.94)(136.0589, 1829.6232)(156.039, 9080.61)
DG(18:1(9Z)/14:0/0:0)-PAMDB003696	-2.25225	0.402766	0.0201139	-0.266416	1.67802	0.015687	0.217166	0.0192785	-0.015687	-22.9024	-4.94599	-22.9337	DG(18:1(9Z)/14:0/0:0)-PAMDB003696	DG(18:1(9Z)/14:0/0:0)-PAMDB003696 [ C35 H66 O5, tgt=42.21, overall=42.21 ]			(549.36774, 64040.945)(550.48047, 19636.568)(551.49286, 80912.83)(552.4957, 22052.607)(553.4981, 3906.565)(549.4751, 8676.65)(550.485, 1941.13)(571.5276, 543.58)(572.1679, 120156.36)(573.2536, 37213.152)(574.48206, 9298.368)(575.4905, 18642.02)(576.494, 4054.31)
L-Aspartate-semialdehyde-PAMDB000833	-0.138513	-0.174199	-21.312	0.500123	0.0379038	0.192557	-0.0379038	-0.0391684	-0.224019	0.817698	0.474715	0.685636	L-Aspartate-semialdehyde-PAMDB000833	L-Aspartate-semialdehyde-PAMDB000833 [ C4 H7 N O3, tgt=76.71, overall=76.71 ]			(119.04681, 6542.43)(102.04419, 455.32333)(135.0777, 61777.6)(136.08083, 2409.6995)(117.06762, 11649.855)
PG(14:0/10:0(3-OH))-PAMDB004071	19.0301	19.4104	18.6038	-0.312298	-0.585938	-0.29796	-0.463926	-0.398239	-0.384954	0.446217	0.29796	0.414928	PG(14:0/10:0(3-OH))-PAMDB004071	PG(14:0/10:0(3-OH))-PAMDB004071 [ C30 H59 O11 P, tgt=39.06, overall=39.06 ]			(644.42865, 4355.4)(626.4005, 12244.133)(627.4037, 495.695)(651.3652, 177.45)
PE(14:0/17:0cycw7c)-PAMDB002006	-2.27837	-1.12275	1.72389	2.81196	1.07598	-21.0459	2.76707	2.70729	0.91389	-20.3017	-20.4499	-0.91389	PE(14:0/17:0cycw7c)-PAMDB002006	PE(14:0/17:0cycw7c)-PAMDB002006 [ C37 H72 N O8 P, tgt=52.49, overall=52.49 ]			(689.98596, 6708.81)(690.4833, 2250.19)(675.8234, 9314.354)(677.504, 3160.8252)(690.493, 145.3)(674.5031, 13143.329)(675.675, 3969.332)(676.67834, 9102.69)(677.3168, 2645.5479)(677.51886, 11326.82)(678.52106, 3098.8867)(709.53357, 18325.473)(712.03796, 12052.402)(713.05, 17268.67)(712.5439, 3806.4)(713.5567, 14878.42)(694.5498, 2149.36)(716.0067, 5874.689)(717.51166, 2246.5017)(718.5253, 2381.746…
Threoninyl-Aspartate_BMDB62260	0.335333	0.098362	-0.31073	-0.098362	0.159637	-0.504339	0.541258	-0.31505	0.353577	1.58809	-16.7637	-16.6468	Threoninyl-Aspartate_BMDB62260	Threoninyl-Aspartate_BMDB62260 [ C8 H14 N2 O6, tgt=49.06, overall=49.06 ]			(235.09195, 8053.7554)(252.11804, 3822.6836)(257.0734, 2307.7551)(258.0737, 722.75)(240.0628, 3035.55)
Glutaminylhistidine_BMDB62231	-0.0476894	-0.498373	-0.537691	-0.0790272	-0.123379	0.0476894	0.383116	0.544964	0.291695	0.820278	-16.9891	0.111998	Glutaminylhistidine_BMDB62231	Glutaminylhistidine_BMDB62231 [ C11 H17 N5 O4, tgt=38.86, overall=38.86 ]			(288.1392, 16107.73)(267.11774, 36316.57)(268.12067, 2490.024)(270.1405, 2028.04)(302.59018, 4739.4443)(305.36612, 1711.5719)(283.14594, 14537.239)(310.121, 45286.26)(311.1238, 2949.55)
Reducedriboflavin-PAMDB001686	-0.205034	-1.26723	-0.395897	-0.461252	-0.838703	0.254652	0.0656185	-0.0232658	0.0232658	0.576704	0.550222	0.986574	Reducedriboflavin-PAMDB001686	Reducedriboflavin-PAMDB001686 [ C17 H22 N4 O6, tgt=61.09, overall=61.09 ]			(360.14273, 24052.557)(361.14584, 1077.3167)(384.47372, 293.54333)
PE(16:1(9Z)/17:0cycw7c)-PAMDB006677	-1.42164	2.32591	-0.0814495	-1.57157	1.41635	-20.4727	0.885342	0.370131	1.03998	-0.00787735	0.00787735	-0.59066	PE(16:1(9Z)/17:0cycw7c)-PAMDB006677	PE(16:1(9Z)/17:0cycw7c)-PAMDB006677 [ C38 H72 N O8 P, tgt=53.75, overall=53.75 ]			(704.86053, 14154.704)(702.5249, 11224.06)(683.5067, 9205.15)(706.5262, 33597.215)(707.5284, 10567.863)(719.7473, 3726.9324)(725.5423, 2416.14)(701.68964, 18225.414)(702.5253, 7225.426)(709.8594, 25353.518)(710.4991, 11064.485)(710.50366, 2855.984)
DG(14:0(3-OH)/16:1(9Z)/0:0)-PAMDB006889	-0.944182	0.753087	0.352559	-1.90112	0.0266409	-0.0266409	0.203818	0.102592	0.0489626	-25.293	-6.90235	-25.3243	DG(14:0(3-OH)/16:1(9Z)/0:0)-PAMDB006889	DG(14:0(3-OH)/16:1(9Z)/0:0)-PAMDB006889 [ C33 H62 O6, tgt=49.95, overall=49.95 ]			(577.43335, 233386.86)(578.4362, 70085.41)(579.43854, 9365.79)(580.4394, 592.51)(572.7798, 554152.9)(573.7827, 193154.11)(574.78595, 44227.535)(578.5127, 48242.2)(558.46173, 28225.06)(559.46454, 7072.246)(560.4626, 4307.07)(561.4662, 703.0)(563.4522, 1318.4067)(560.4932, 10180.23)
PS(19:0cycw8c/10:0)-PAMDB006746	-0.145521	-0.108856	-0.581821	-0.219355	-0.234129	-0.338436	0.388393	0.108856	0.605173	1.25394	0.43609	1.29806	PS(19:0cycw8c/10:0)-PAMDB006746	PS(19:0cycw8c/10:0)-PAMDB006746 [ C35 H64 N O10 P, tgt=47.95, overall=47.95 ]			(713.41016, 120633.625)(714.4126, 36948.496)(715.41406, 4999.241)
N10-Formyl-THF-PAMDB000213	0.599111	-0.452477	-1.00832	0.283423	-0.0369425	0.0369425	-0.447207	-0.396651	-0.478314	0.342549	0.916724	1.82146	N10-Formyl-THF-PAMDB000213	N10-Formyl-THF-PAMDB000213 [ C20 H23 N7 O7, tgt=18.48, overall=18.48 ]			(455.15933, 9186.505)(456.173, 9634.834)(457.177, 1675.965)(474.1866, 3374.082)(498.25668, 4980.335)(498.16306, 818.7933)(478.15445, 5021.0537)(479.1573, 1948.12)
PE(14:0/18:1(11Z))-PAMDB000754	-2.27837	-1.12275	1.72389	2.81196	1.07598	-21.0459	2.76707	2.70729	0.91389	-20.3017	-20.4499	-0.91389	PE(14:0/18:1(11Z))-PAMDB000754	PE(14:0/18:1(11Z))-PAMDB000754 [ C37 H72 N O8 P, tgt=52.49, overall=52.49 ]			(689.98596, 6708.81)(690.4833, 2250.19)(675.8234, 9314.354)(677.504, 3160.8252)(690.493, 145.3)(674.5031, 13143.329)(675.675, 3969.332)(676.67834, 9102.69)(677.3168, 2645.5479)(677.51886, 11326.82)(678.52106, 3098.8867)(709.53357, 18325.473)(712.03796, 12052.402)(713.05, 17268.67)(712.5439, 3806.4)(713.5567, 14878.42)(694.5498, 2149.36)(716.0067, 5874.689)(717.51166, 2246.5017)(718.5253, 2381.746…
Leucyl-Tryptophan_BMDB62247	11.4832	11.6818	11.4141	11.5117	11.181	11.6346	-12.0912	-12.0255	-12.0122	-11.181	-11.3293	-11.2123	Leucyl-Tryptophan_BMDB62247	Leucyl-Tryptophan_BMDB62247 [ C17 H23 N3 O3, tgt=60.70, overall=60.70 ]			(317.17233, 13277.44)(318.17392, 976.9551)(322.1518, 851.45)
mupirocin-PAMDB100066	1.38084	0.264242	-0.264242	1.16378	0.797455	1.36643	-19.1883	-19.1226	-19.1093	-18.2782	1.28897	-18.3095	mupirocin-PAMDB100066	mupirocin-PAMDB100066 [ C26 H44 O9, tgt=41.98, overall=41.98 ]			(505.3016, 670.5)(483.29724, 59706.156)(484.29968, 10895.284)(485.3033, 337.35)(483.2963, 1703.87)
(2Z4Z)-23-dichloromuconicacid-PAMDB100035	18.4058	17.8772	-0.498417	-0.00716972	-0.280809	0.00716782	-0.158798	-0.093111	-0.0798264	0.751345	0.603088	0.720057	(2Z4Z)-23-dichloromuconicacid-PAMDB100035	(2Z4Z)-23-dichloromuconicacid-PAMDB100035 [ C6 H4 Cl2 O4, tgt=42.62, overall=42.62 ]			(201.9514, 3946.93)(232.98526, 6749.6)(216.975, 2577.61)
N5-Formyl-H4F-PAMDB000421	0.599111	-0.452477	-0.68677	0.283423	-0.0369425	0.0369425	-0.447207	-0.396651	-0.478314	0.342549	0.916724	1.82146	N5-Formyl-H4F-PAMDB000421	N5-Formyl-H4F-PAMDB000421 [ C20 H23 N7 O7, tgt=18.48, overall=18.48 ]			(455.15933, 9186.505)(456.17303, 9712.865)(457.177, 1675.965)(474.18594, 3429.1301)(498.25668, 4743.2803)(498.16306, 778.37006)(478.15445, 4968.272)(479.1573, 1948.12)
acetylpyruvicacid-PAMDB100009	-0.0837069	2.18071	1.17452	-16.4288	-16.7024	-16.4145	0.0837069	0.118375	2.00879	-15.6703	0.929448	-15.7016	acetylpyruvicacid-PAMDB100009	acetylpyruvicacid-PAMDB100009 [ C5 H6 O4, tgt=14.34, overall=14.34 ]			(148.05728, 6815.407)(130.04694, 3581.9102)(157.02116, 82041.74)(158.02429, 3252.4648)
DG(16:0/14:0(3-OH)/0:0)-PAMDB006909	-0.902259	0.895795	0.54363	-23.0001	-0.861388	0.256656	0.329837	0.308475	-0.256656	1.01697	-22.3898	-22.2728	DG(16:0/14:0(3-OH)/0:0)-PAMDB006909	DG(16:0/14:0(3-OH)/0:0)-PAMDB006909 [ C33 H64 O6, tgt=42.96, overall=42.96 ]			(558.4623, 44500.164)(559.46484, 11434.303)(563.3379, 34600.297)(563.5108, 26303.91)(576.16235, 42118.125)(577.2491, 15314.021)(577.7952, 56685.23)(578.7984, 15532.126)(579.52, 8921.222)(580.5248, 1675.07)(561.8812, 42115.707)(583.72455, 6288.5337)(585.19305, 7156.5986)(585.4797, 5223.005)(562.13043, 2626.6323)(562.4614, 3478.31)
DG(14:0/16:0/0:0)-PAMDB003653	0.367508	0.202709	-0.308622	0.378128	-0.0527611	0.0527611	-1.43602	0.136209	-1.1331	-0.578482	-0.391176	0.182268	DG(14:0/16:0/0:0)-PAMDB003653	DG(14:0/16:0/0:0)-PAMDB003653 [ C33 H64 O5, tgt=75.68, overall=75.68 ]			(547.5098, 50083.402)(523.4621, 12664.34)(559.50934, 99881.125)(560.51196, 30427.25)(561.5141, 4150.3647)(549.4774, 7111.22)
Quinone-PAMDB003450	0.153512	0.880397	0.711253	-17.9662	-18.2398	-17.9519	-18.1178	-0.153512	0.620503	-17.2077	3.34106	1.46842	Quinone-PAMDB003450	Quinone-PAMDB003450 [ C6 H4 O2, tgt=21.83, overall=21.83 ]			(126.05224, 3954.3157)(109.026, 10430.216)(112.99722, 8001.5947)
L-Glutamic-gamma-semialdehyde-PAMDB000331	8.89374	8.74601	8.0991	8.85716	8.79638	8.78294	-9.00925	-8.94356	-8.93028	-8.0991	-8.24736	-8.13039	L-Glutamic-gamma-semialdehyde-PAMDB000331	L-Glutamic-gamma-semialdehyde-PAMDB000331 [ C5 H9 N O3, tgt=47.17, overall=47.17 ]			(115.051796, 5270.5103)(149.09294, 1591.7134)(131.08243, 8206.356)
PE(10:0/18:0)-PAMDB001989	-0.369043	-0.58124	1.37052	0.369043	-0.494204	1.32026	1.91221	-0.512693	1.82165	1.99445	-0.912256	-0.675226	PE(10:0/18:0)-PAMDB001989	PE(10:0/18:0)-PAMDB001989 [ C33 H66 N O8 P, tgt=25.46, overall=25.46 ]			(637.4565, 12409.304)(638.4589, 2334.66)(617.4472, 397.11334)(618.4528, 634.15)(623.4411, 2905.95)(637.4559, 18717.768)(638.4582, 3263.8232)(618.4549, 832.48)(657.4936, 33481.117)(658.49695, 14109.775)(659.5071, 12951.925)(662.2645, 1349.9601)(664.4448, 383.45)(645.45776, 1540.5901)(646.4617, 320.895)
Physeteric acid_BMDB62586	0.319247	0.00818539	-0.261321	0.284272	0.0560255	0.269406	-0.330085	-0.00818539	-0.389333	-20.5565	0.140244	-20.5878	Physeteric acid_BMDB62586	Physeteric acid_BMDB62586 [ C14 H26 O2, tgt=82.20, overall=82.20 ]			(209.18579, 5086.396)(212.19675, 29763.887)(213.19978, 1420.5989)(247.23792, 402128.6)(248.24081, 62359.676)(249.2435, 1769.794)(226.21211, 38221.586)(227.21504, 2940.086)(228.22725, 357.99667)
(S)-2345-tetrahydrodipicolinate-PAMDB006304	-18.2589	2.38493	1.43906	-18.0964	-18.3701	-18.0821	0.0171413	0.718548	-0.0171413	1.21246	3.36983	-17.3692	(S)-2345-tetrahydrodipicolinate-PAMDB006304	(S)-2345-tetrahydrodipicolinate-PAMDB006304 [ C7 H7 N O4, tgt=4.49, overall=4.49 ]			(169.03233, 68123.22)(170.03465, 2633.7349)(156.039, 2206.7)(170.0452, 1879.835)(187.0767, 43111.523)(188.0776, 9002.01)(189.0758, 5322.04)(172.32181, 2706.1548)(193.03047, 6477.807)(175.01613, 14791.561)
PS(15:0cyclo/19:iso)-PAMDB003986	21.4702	21.9597	-1.15999	21.7291	21.6919	-0.654404	-0.82037	-0.754683	-0.741398	0.0897732	-0.0584831	0.058485	PS(15:0cyclo/19:iso)-PAMDB003986	PS(15:0cyclo/19:iso)-PAMDB003986 [ C40 H74 N O10 P, tgt=20.27, overall=20.27 ]			(764.0016, 2805.145)(764.5033, 3506.35)(742.5227, 34755.594)(743.5254, 12374.925)(744.5292, 1034.845)
Isovaleryl-L-carnitine_BMDB62648	0.764664	2.65286	1.42651	-20.7546	-1.67068	0.671062	-20.9062	0.459465	-0.0718822	0.0718822	-20.1443	-20.0274	Isovaleryl-L-carnitine_BMDB62648	Isovaleryl-L-carnitine_BMDB62648 [ C12 H23 N O4, tgt=78.12, overall=78.12 ]			(246.1655, 168943.78)(247.16832, 14763.728)(248.1697, 1380.35)(229.15894, 40819.395)(229.15837, 4830.5)(250.13708, 88280.055)(251.13977, 6956.483)
PE(12:0/12:0)-PAMDB001994	10.2594	9.92588	-11.0243	9.92762	9.84785	-10.5187	9.77457	-10.619	9.99211	-9.77457	-9.92283	-9.80586	PE(12:0/12:0)-PAMDB001994	PE(12:0/12:0)-PAMDB001994 [ C29 H58 N O8 P, tgt=59.95, overall=59.95 ]			(601.4276, 29855.314)(602.4307, 4948.692)(579.4148, 32056.295)(580.4172, 4549.408)(590.3895, 1284.9299)
Tricosanoic acid_BMDB01160	-17.5576	2.51568	1.69659	1.90073	1.90337	1.87487	0.098362	-0.098362	-17.4677	-16.6366	-16.7848	-16.6678	Tricosanoic acid_BMDB01160	Tricosanoic acid_BMDB01160 [ C23H46O2, tgt= ]			(339.19684, 173784.58)(339.5908, 52293.22)(340.34402, 4722.3667)(354.36545, 16257.469)(355.36795, 3163.3052)
5-Tetradecenoic acid_BMDB00499	0.221112	-0.0899496	-0.359456	0.186137	-0.0421095	0.171271	-0.42822	-0.10632	-0.487468	0.455951	0.0421095	0.520986	5-Tetradecenoic acid_BMDB00499	5-Tetradecenoic acid_BMDB00499 [ C14 H26 O2, tgt=82.20, overall=82.20 ]			(209.18584, 4946.0977)(212.19685, 29168.814)(213.19978, 1420.5989)(247.23799, 397644.4)(248.24089, 61228.715)(249.24359, 1560.4259)(226.21222, 37381.887)(227.21509, 2734.0833)(228.22725, 357.99667)
23-Bis(3-hydroxytetradecanoyl)-beta-D-glucosaminyl1-phosphate-PAMDB000903	-0.126179	17.5797	-0.454918	0.0363293	-0.23731	0.0506668	-0.115299	-0.049612	-0.0363274	0.794844	0.646587	0.763556	23-Bis(3-hydroxytetradecanoyl)-beta-D-glucosaminyl1-phosphate-PAMDB000903	23-Bis(3-hydroxytetradecanoyl)-beta-D-glucosaminyl1-phosphate-PAMDB000903 [ C34 H66 N O12 P, tgt= ]			(717.4419, 8775.81)(731.4671, 18726.79)(732.4697, 7235.99)
Argininosuccinicacid-PAMDB000224	17.8114	17.5306	17.5389	-0.312298	-0.585938	-0.29796	-0.463926	-0.398239	-0.384954	0.446217	0.29796	0.414928	Argininosuccinicacid-PAMDB000224	Argininosuccinicacid-PAMDB000224 [ C10 H18 N4 O6, tgt=64.01, overall=64.01 ]			(313.1135, 16586.975)(314.11655, 577.79)(300.1189, 449.46503)
p-Aminobenzoicacid-PAMDB000367	0.088275	3.77421	3.57717	-0.371291	-0.088275	-17.3082	0.889272	-0.462993	0.169833	-16.5641	2.59814	-16.5953	p-Aminobenzoicacid-PAMDB000367	p-Aminobenzoicacid-PAMDB000367 [ C7 H7 N O2, tgt=44.15, overall=44.15 ]			(137.88387, 23755.484)(139.05515, 1676.435)(138.0521, 50055.223)(139.055, 4283.83)(123.05278, 4311.9487)(124.0559, 592.95)(160.0935, 5451.02)(142.0833, 1233.06)(165.051, 437.31)
DG(18:0/18:0/0:0)-PAMDB003691	-4.13651	-1.4381	0.0266142	1.30393	-1.32639	0.887528	-0.0198622	0.386582	0.0198622	1.57238	-4.48186	-4.42892	DG(18:0/18:0/0:0)-PAMDB003691	DG(18:0/18:0/0:0)-PAMDB003691 [ C39 H76 O5, tgt=64.44, overall=64.44 ]			(625.5742, 19729.83)(626.5768, 6439.24)(606.5416, 3186.93)(629.54376, 307332.1)(630.54565, 50170.547)(631.5469, 5498.4604)
DG(17:0cycw7c/19:iso/0:0)-PAMDB006929	0.482298	1.75502	3.13541	4.39574	1.67216	4.04458	-1.58787	-0.482298	-2.44229	-22.4596	-22.6079	-22.4909	DG(17:0cycw7c/19:iso/0:0)-PAMDB006929	DG(17:0cycw7c/19:iso/0:0)-PAMDB006929 [ C39 H74 O5, tgt=60.79, overall=60.79 ]			(605.5359, 7751.8525)(606.5392, 31.775002)(645.6144, 317.86)(628.0902, 571088.25)(629.09515, 221450.5)(630.09814, 38308.56)(631.54596, 6152.722)
DG(18:0/19:1(9Z)/0:0)-PAMDB003693	-22.3824	-0.895996	1.4035	2.55202	-1.24298	1.81793	0.895996	1.14849	1.20184	-21.4614	-21.6096	-21.4927	DG(18:0/19:1(9Z)/0:0)-PAMDB003693	DG(18:0/19:1(9Z)/0:0)-PAMDB003693 [ C40 H76 O5, tgt= ]			(659.5767, 205.45)(642.55206, 90347.766)(643.55225, 30288.098)(644.5496, 6474.2964)
cis-13-Octadecenoic acid_BMDB62077	0.673344	0.657192	-0.534178	-0.341509	0.00588226	-0.00588226	-0.446711	-29.1644	-0.447968	0.494982	0.14739	0.612705	cis-13-Octadecenoic acid_BMDB62077	cis-13-Octadecenoic acid_BMDB62077 [ C18 H34 O2, tgt=92.28, overall=92.28 ]			(265.2484, 593657.94)(266.2513, 98368.05)(267.25427, 5525.8926)(268.2583, 30389.469)(269.26117, 4040.67)(282.27502, 1.1418404E7)(283.27783, 2470817.2)(284.28143, 241057.31)(285.28415, 11129.535)
S-Adenosylhomocysteine-PAMDB000205	-0.252623	0.895786	0.449142	-0.784632	-1.10544	0.00889587	-0.559824	0.146063	0.349813	-0.328527	0.948782	-0.00889587	S-Adenosylhomocysteine-PAMDB000205	S-Adenosylhomocysteine-PAMDB000205 [ C14 H20 N6 O5 S, tgt=25.34, overall=25.34 ]			(366.1022, 97991.29)(367.10306, 14203.286)(368.10535, 546.095)(404.166, 551.65)(384.14166, 900.13)
D-Myo-inositol4-phosphate-PAMDB000335	-0.831249	18.568	17.8579	-0.668741	-0.942381	-0.654404	-0.82037	17.3699	17.7674	0.0897732	-0.0584831	0.058485	D-Myo-inositol4-phosphate-PAMDB000335	D-Myo-inositol4-phosphate-PAMDB000335 [ C6 H13 O9 P, tgt=48.78, overall=48.78 ]			(261.03217, 2155.51)(260.04822, 28408.873)(261.54883, 695.8)(262.0468, 497.13)(283.01324, 1107.245)
PG(18:1(9Z)/12:0)-PAMDB006393	1.95778	-0.218606	-18.9264	0.192035	1.49855	-0.192035	-0.231694	-0.423762	-0.460401	1.16681	0.955075	0.955777	PG(18:1(9Z)/12:0)-PAMDB006393	PG(18:1(9Z)/12:0)-PAMDB006393 [ C36 H69 O10 P, tgt=32.40, overall=32.40 ]			(694.48114, 2932.2634)(695.484, 907.22)(694.4801, 112.36)(699.5013, 2912.59)(680.4673, 26821.832)(681.46985, 9225.946)(710.59375, 9247.45)(712.4913, 297.68)
DG(15:0/15:0/0:0)-PAMDB003661	0.367508	0.202709	-0.308622	0.378128	-0.0527611	0.0527611	-1.43602	0.136209	-1.1331	-0.578482	-0.391176	0.182268	DG(15:0/15:0/0:0)-PAMDB003661	DG(15:0/15:0/0:0)-PAMDB003661 [ C33 H64 O5, tgt=75.68, overall=75.68 ]			(547.5098, 50083.402)(523.4621, 12664.34)(559.50934, 99881.125)(560.51196, 30427.25)(561.5141, 4150.3647)(549.4774, 7111.22)
Homocysteine-PAMDB006170	17.4983	16.2188	-0.803545	-0.312298	-0.585938	-0.29796	16.7599	-0.398239	-0.384954	0.446217	0.29796	0.414928	Homocysteine-PAMDB006170	Homocysteine-PAMDB006170 [ C4 H9 N O2 S, tgt=44.46, overall=44.46 ]			(137.04245, 1140.8049)(136.0589, 9472.7)(158.02393, 9129.09)
DG(15:0/14:0(3-OH)/0:0)-PAMDB006899	1.01571	-1.51954	0.360069	0.660919	-0.501373	-0.730925	3.21149	2.91972	2.90838	-20.7505	-20.8987	-0.360069	DG(15:0/14:0(3-OH)/0:0)-PAMDB006899	DG(15:0/14:0(3-OH)/0:0)-PAMDB006899 [ C32 H62 O6, tgt=60.87, overall=60.87 ]			(542.4568, 23876.115)(543.4587, 6227.0234)(547.46094, 12971.8545)(548.72095, 10890.572)(549.47876, 241147.92)(561.242, 2321.695)(565.5069, 569.96)(544.47076, 7318.6606)(545.4748, 1831.3833)(567.9486, 24075.174)(569.1155, 21314.166)(570.12146, 6451.98)(570.4573, 3831.69)
3-Alpha7-alpha12-alpha-trihydroxy-5-beta-cholanate-PAMDB003557	0.806027	1.47722	0.00980473	0.539988	0.130815	-20.6787	-20.8447	-0.00980473	-0.19155	-19.9345	-1.09139	0.689002	3-Alpha7-alpha12-alpha-trihydroxy-5-beta-cholanate-PAMDB003557	3-Alpha7-alpha12-alpha-trihydroxy-5-beta-cholanate-PAMDB003557 [ C24 H40 O5, tgt=39.94, overall=39.94 ]			(391.27628, 47877.63)(392.27917, 8052.544)(393.29047, 645549.5)(394.2934, 132901.77)(395.29614, 12532.379)(395.30734, 3933.845)(432.33536, 24588.236)(408.8169, 108263.33)(410.32706, 56157.344)(413.25763, 29118.605)(414.26035, 5227.695)
Fructose1-phosphate-PAMDB000243	-0.831249	18.568	17.8579	-0.668741	-0.942381	-0.654404	-0.82037	17.3699	17.7674	0.0897732	-0.0584831	0.058485	Fructose1-phosphate-PAMDB000243	Fructose1-phosphate-PAMDB000243 [ C6 H13 O9 P, tgt=48.78, overall=48.78 ]			(261.03217, 2155.51)(260.04822, 28408.873)(261.54883, 695.8)(262.0468, 497.13)(283.01324, 1107.245)
PGP(14:0/12:0(3-OH))-PAMDB006579	0.00574875	0.125877	-0.442305	-0.132301	-0.00574875	-0.0215034	-0.0187798	-0.259329	0.214787	0.775621	0.396156	0.444876	PGP(14:0/12:0(3-OH))-PAMDB006579	PGP(14:0/12:0(3-OH))-PAMDB006579 [ C32 H64 O14 P2, tgt=42.86, overall=42.86 ]			(716.3757, 22197.717)(717.3784, 6050.2173)(718.3871, 1846.1788)
Galactitol-PAMDB000040	0.089776	-1.6446	-3.18672	-19.0894	0.0395098	-0.0368109	0.0368109	0.0501623	-0.111831	0.596444	-0.125518	0.498742	Galactitol-PAMDB000040	Galactitol-PAMDB000040 [ C6 H14 O6, tgt=52.22, overall=52.22 ]			(182.07973, 3575.3257)(166.06924, 46139.312)(167.07181, 2456.875)(183.08842, 23767.19)(184.09355, 2702.8325)(169.0828, 10096.4)(204.11935, 155812.88)(205.1221, 8959.205)(185.70995, 1103.172)(186.1089, 406.35)(210.08484, 950.6567)(191.0643, 1069.88)
PE(12:0/14:0(3-OH))-PAMDB003863	0.410071	0.0018816	-0.409055	0.0458879	-0.0458631	-0.0018816	-0.186389	-0.518912	-0.0218897	1.0661	0.855023	1.57681	PE(12:0/14:0(3-OH))-PAMDB003863	PE(12:0/14:0(3-OH))-PAMDB003863 [ C31 H62 N O9 P, tgt=63.88, overall=63.88 ]			(645.4587, 16108.429)(646.46234, 3468.5117)(623.44073, 21821.123)(624.44336, 2953.585)
PE(10:0(3-OH)/16:0)-PAMDB003837	0.410071	0.0018816	-0.409055	0.0458879	-0.0458631	-0.0018816	-0.186389	-0.518912	-0.0218897	1.0661	0.855023	1.57681	PE(10:0(3-OH)/16:0)-PAMDB003837	PE(10:0(3-OH)/16:0)-PAMDB003837 [ C31 H62 N O9 P, tgt=63.88, overall=63.88 ]			(645.4587, 16108.429)(646.46234, 3468.5117)(623.44073, 21821.123)(624.44336, 2953.585)
Se-Adenosylselenomethionine-PAMDB000808	0.356054	1.27693	0.458832	-17.3215	0.706865	-0.577246	-1.12281	-0.0602875	0.0602875	-0.197878	-16.7112	1.11599	Se-Adenosylselenomethionine-PAMDB000808	Se-Adenosylselenomethionine-PAMDB000808 [ C15 H23 N6 O5 Se, tgt=0.14, overall=0.14 ]			(430.40955, 2664.0256)(433.0831, 2994.77)(452.06305, 7689.0186)(452.46274, 1125.84)(457.0652, 645.28)
PG(15:0cyclo/10:0(3-OH))-PAMDB004079	9.18674	8.94556	8.88851	8.93053	8.70636	-9.30909	-9.47505	8.56491	-9.39608	-8.56491	-8.71317	-8.5962	PG(15:0cyclo/10:0(3-OH))-PAMDB004079	PG(15:0cyclo/10:0(3-OH))-PAMDB004079 [ C31 H59 O11 P, tgt=57.88, overall=57.88 ]			(638.40515, 10837.068)(639.408, 2158.0916)
Dihydrolipoylprotein-PAMDB004304	-0.418877	0.54384	0.084238	-3.42522	-4.0119	-3.82263	-0.084238	0.0917778	0.235424	-3.18859	1.99502	1.31339	Dihydrolipoylprotein-PAMDB004304	Dihydrolipoylprotein-PAMDB004304 [ C4 H6 N2 O2, tgt=64.72, overall=64.72 ]			(115.0519, 22033.99)(116.057175, 854.08746)(132.0746, 545820.06)(133.07712, 17562.516)(134.0784, 1111.0425)(114.06409, 28501.55)(115.0671, 1075.7)
1-Acyl-sn-glycero-3-phosphoethanolamine(N-C12:0)-PAMDB001522	0.790054	-0.192694	0.0082531	0.594994	-0.0082531	0.231184	-1.25914	-0.366661	-1.02357	-0.127357	0.135015	0.169664	1-Acyl-sn-glycero-3-phosphoethanolamine(N-C12:0)-PAMDB001522	1-Acyl-sn-glycero-3-phosphoethanolamine(N-C12:0)-PAMDB001522 [ C17 H36 N O7 P, tgt=76.15, overall=76.15 ]			(397.22305, 36834.773)(398.22534, 4548.775)(379.2018, 2916.3113)
Betaine-PAMDB000564	-22.4393	-0.986188	-22.768	0.60621	0.374049	0.92492	-2.04019	-0.263583	0.0364866	2.84557	-0.0364866	4.2348	Betaine-PAMDB000564	Betaine-PAMDB000564 [ C5H11NO2, tgt= ]			(140.0652, 5970.663)(100.0739, 189289.34)(101.0769, 6596.53)(118.0843, 682121.6)(119.08698, 28249.135)(120.088394, 1858.9141)
PGP(14:0/15:0cyclo)-PAMDB006581	0.0645399	-0.17957	0.0573702	-0.68661	-0.451365	-0.0573702	0.274156	-1.68452	-0.103795	2.66428	2.39872	2.66908	PGP(14:0/15:0cyclo)-PAMDB006581	PGP(14:0/15:0cyclo)-PAMDB006581 [ C35 H68 O13 P2, tgt=22.07, overall=22.07 ]			(740.4187, 22074.164)(741.42114, 6112.148)(759.4202, 32605.764)(760.4213, 14873.804)(776.43866, 1191.1866)(765.4096, 7334.0767)
PE(15:0/12:0(3-OH))-PAMDB003884	0.829388	-1.3664	-0.28194	0.117222	0.0674343	0.0420914	-0.0420914	-20.8234	-20.8101	0.0986881	-20.1272	1.32715	PE(15:0/12:0(3-OH))-PAMDB003884	PE(15:0/12:0(3-OH))-PAMDB003884 [ C32 H64 N O9 P, tgt=65.80, overall=65.80 ]			(659.0314, 12332.669)(660.24884, 4558.0503)(660.8033, 872.0334)(637.45593, 24646.365)(638.4584, 4638.8135)
DG(19:iso/12:0(3-OH)/0:0)-PAMDB006946	0.149675	1.48292	-21.8022	-0.149675	2.61784	-1.44852	4.14369	3.00418	4.00943	-1.8585	-20.7007	-20.5838	DG(19:iso/12:0(3-OH)/0:0)-PAMDB006946	DG(19:iso/12:0(3-OH)/0:0)-PAMDB006946 [ C34 H66 O6, tgt=63.33, overall=63.33 ]			(570.8194, 157659.52)(571.82184, 53141.61)(574.4841, 32128.41)(575.4912, 19814.47)(576.4948, 2791.74)(556.1392, 4009.78)(574.4882, 212765.06)(575.82886, 87149.37)(576.50024, 48906.812)(576.4954, 2595.96)(577.5081, 48345.32)(572.501, 28941.496)(573.504, 7570.62)(574.5096, 86.98)(596.4782, 74160.555)(597.4807, 21082.58)(598.4921, 198084.14)(599.49585, 65325.47)
Dyspropterin-PAMDB000292	0.239781	0.0355558	0.077239	-0.757695	-0.433637	-0.0355558	0.927968	-19.6382	0.476703	1.96264	-18.942	-18.8251	Dyspropterin-PAMDB000292	Dyspropterin-PAMDB000292 [ C9 H11 N5 O3, tgt=69.92, overall=69.92 ]			(237.10783, 43447.375)(238.11067, 2766.5154)
CDP-DG(16:1(9Z)/10:0)-PAMDB003752	-0.484076	-0.489615	-0.63204	0.355303	-0.0845337	0.103533	0.0845337	-0.185972	-0.142542	0.918268	0.596918	0.764288	CDP-DG(16:1(9Z)/10:0)-PAMDB003752	CDP-DG(16:1(9Z)/10:0)-PAMDB003752 [ C38 H67 N3 O15 P2, tgt=47.84, overall=47.84 ]			(851.38354, 166438.72)(852.3864, 73823.805)(853.38794, 13987.645)(854.3878, 220.78)
Pivaloylcarnitine_BMDB62858	0.764664	2.65286	1.42651	-20.7546	-1.67068	0.671062	-20.9062	0.459465	-0.0718822	0.0718822	-20.1443	-20.0274	Pivaloylcarnitine_BMDB62858	Pivaloylcarnitine_BMDB62858 [ C12 H23 N O4, tgt=78.12, overall=78.12 ]			(246.1655, 168943.78)(247.16832, 14763.728)(248.1697, 1380.35)(229.15894, 40819.395)(229.15837, 4830.5)(250.13708, 88280.055)(251.13977, 6956.483)
DG(10:0(3-OH)/19:iso/0:0)-PAMDB006864	1.01571	-1.51954	0.360069	0.660919	-0.501373	-0.730925	3.21149	2.91972	2.90838	-20.7505	-20.8987	-0.360069	DG(10:0(3-OH)/19:iso/0:0)-PAMDB006864	DG(10:0(3-OH)/19:iso/0:0)-PAMDB006864 [ C32 H62 O6, tgt=60.87, overall=60.87 ]			(542.4568, 23876.115)(543.4587, 6227.0234)(547.46094, 12971.8545)(548.72095, 10890.572)(549.47876, 241147.92)(561.242, 2321.695)(565.5069, 569.96)(544.47076, 7318.6606)(545.4748, 1831.3833)(567.9486, 24075.174)(569.1155, 21314.166)(570.12146, 6451.98)(570.4573, 3831.69)
DG(10:0/10:0/0:0)-PAMDB003631	-23.29	0.891886	1.67006	-23.1275	3.34687	-23.1132	2.89143	3.57149	-0.891886	-22.369	-22.5172	2.33309	DG(10:0/10:0/0:0)-PAMDB003631	DG(10:0/10:0/0:0)-PAMDB003631 [ C23H44O5, tgt= ]			(402.3249, 14.95)(404.3401, 47.18)(383.309, 434861.47)(384.3118, 89598.98)(385.31375, 8926.502)(420.3606, 942.7425)(420.3601, 68.86)(422.3547, 55.86)(423.29962, 2134.8398)(424.96573, 216.19667)(405.9631, 6287.603)(408.30905, 1385.875)
cis-5-Tetradecenoylcarnitine_BMDB02014	9.69215	9.15114	12.2258	-9.90966	-10.1833	-9.89532	11.9995	12.7167	12.7705	-9.15114	-9.2994	-9.18243	cis-5-Tetradecenoylcarnitine_BMDB02014	cis-5-Tetradecenoylcarnitine_BMDB02014 [ C21 H39 N O4, tgt=51.08, overall=51.08 ]			(369.2929, 27794.656)(370.29575, 3629.2024)(355.27856, 468261.72)(356.28146, 87310.3)(371.3086, 622656.4)(372.31165, 133459.36)(373.31354, 12157.085)(388.33398, 4955.5366)(389.33585, 1542.52)(371.3094, 54132.11)(372.31213, 9461.43)(373.31424, 549.08)(392.2795, 5714.1094)
Arg-Arg-Arg_BMDB62550	0.482904	-0.173016	-18.818	0.447386	0.173016	-18.3125	0.874331	0.183489	-1.05999	1.53505	-17.7165	-17.5996	Arg-Arg-Arg_BMDB62550	Arg-Arg-Arg_BMDB62550 [ C18 H38 N12 O4, tgt=50.81, overall=50.81 ]			(486.3158, 13365.592)(487.31708, 1744.448)(469.31714, 1283.32)(469.31772, 6746.6504)(470.3212, 2342.98)
PE(14:0/19:0cycw8c)-PAMDB006666	0.739263	0.121028	0.126719	1.85193	-0.121028	-0.160155	-2.01349	-1.6871	-0.156909	-0.763692	0.497434	0.320834	PE(14:0/19:0cycw8c)-PAMDB006666	PE(14:0/19:0cycw8c)-PAMDB006666 [ C38 H74 N O8 P, tgt=78.91, overall=78.91 ]			(705.4061, 8891.826)(705.5334, 2825.9402)(685.52344, 1914.39)(686.5255, 1397.51)(706.5249, 5771.09)(689.5399, 4768.19)(703.5377, 52381.414)(704.5398, 16941.92)(708.49927, 121000.734)(709.50195, 47148.008)(710.504, 7441.666)
D-Mannose1-phosphate-PAMDB000386	-0.831249	18.568	17.8579	-0.668741	-0.942381	-0.654404	-0.82037	17.3699	17.7674	0.0897732	-0.0584831	0.058485	D-Mannose1-phosphate-PAMDB000386	D-Mannose1-phosphate-PAMDB000386 [ C6 H13 O9 P, tgt=48.78, overall=48.78 ]			(261.03217, 2155.51)(260.04822, 28408.873)(261.54883, 695.8)(262.0468, 497.13)(283.01324, 1107.245)
PG(19:0cycv8c/14:0)-PAMDB006515	0.420682	1.432	1.03471	-20.4867	0.58962	-0.331593	0.905972	0.0415544	-0.0415544	-19.7282	-19.8764	-19.7595	PG(19:0cycv8c/14:0)-PAMDB006515	PG(19:0cycv8c/14:0)-PAMDB006515 [ C39 H75 O10 P, tgt=24.22, overall=24.22 ]			(716.508, 18227.871)(717.5109, 6235.534)(718.5132, 90.75)(722.54034, 749.7967)(758.55676, 14825.3955)(735.5453, 553.815)(737.5546, 1555.65)(740.50726, 5997.25)(741.51, 1267.1799)
4-Hydroxybenzoicacid-PAMDB000143	-0.905378	17.9462	17.8388	-0.74287	-1.01651	16.2402	17.469	-0.828812	-0.815527	0.0156441	16.6787	-0.0156441	4-Hydroxybenzoicacid-PAMDB000143	4-Hydroxybenzoicacid-PAMDB000143 [ C7H6O3, tgt= ]			(141.03673, 7347.1675)(142.0385, 1839.24)(157.0678, 18998.732)(158.06935, 2184.6174)(138.85648, 8295.334)(162.02765, 4516.9053)(163.024, 4067.905)(147.02173, 7140.8496)
DG(19:iso/10:0(3-OH)/0:0)-PAMDB006944	1.01571	-1.51954	0.360069	0.660919	-0.501373	-0.730925	3.21149	2.91972	2.90838	-20.7505	-20.8987	-0.360069	DG(19:iso/10:0(3-OH)/0:0)-PAMDB006944	DG(19:iso/10:0(3-OH)/0:0)-PAMDB006944 [ C32 H62 O6, tgt=60.87, overall=60.87 ]			(542.4568, 23876.115)(543.4587, 6227.0234)(547.46094, 12971.8545)(548.72095, 10890.572)(549.47876, 241147.92)(561.242, 2321.695)(565.5069, 569.96)(544.47076, 7318.6606)(545.4748, 1831.3833)(567.9486, 24075.174)(569.1155, 21314.166)(570.12146, 6451.98)(570.4573, 3831.69)
PS(14:0(3-OH)/18:1(9Z))-PAMDB003972	-20.6762	0.527412	0.0919952	0.0747547	-0.247738	0.225168	-0.0747547	-1.16688	-0.743008	-19.7552	0.431734	1.61902	PS(14:0(3-OH)/18:1(9Z))-PAMDB003972	PS(14:0(3-OH)/18:1(9Z))-PAMDB003972 [ C38H70NO11P, tgt= ]			(731.46893, 13105.193)(732.4718, 3188.133)
L-Octanoylcarnitine_BMDB00791	-19.1728	0.0886946	-0.394267	0.497981	-19.284	0.525867	-0.144507	0.82879	-0.0886946	-18.2518	0.880549	0.576482	L-Octanoylcarnitine_BMDB00791	L-Octanoylcarnitine_BMDB00791 [ C15H29NO4, tgt= ]			(273.21613, 2093.7656)(305.2415, 16770.996)(306.24466, 1086.58)(307.255, 123.76)
PE(12:0(3-OH)/15:0)-PAMDB003853	0.829388	-1.3664	-0.28194	0.117222	0.0674343	0.0420914	-0.0420914	-20.8234	-20.8101	0.0986881	-20.1272	1.32715	PE(12:0(3-OH)/15:0)-PAMDB003853	PE(12:0(3-OH)/15:0)-PAMDB003853 [ C32 H64 N O9 P, tgt=65.80, overall=65.80 ]			(659.0314, 12332.669)(660.24884, 4558.0503)(660.8033, 872.0334)(637.45593, 24646.365)(638.4584, 4638.8135)
PE(14:0(3-OH)/19:0cycv8c)-PAMDB003877	0.288576	0.00779915	0.251215	-19.8859	0.0531902	-19.8716	-0.305359	-0.679287	-0.00779915	0.769482	1.67167	-2.20907	PE(14:0(3-OH)/19:0cycv8c)-PAMDB003877	PE(14:0(3-OH)/19:0cycv8c)-PAMDB003877 [ C38 H74 N O9 P, tgt=59.06, overall=59.06 ]			(720.85004, 9581.777)(722.1861, 3074.2434)(725.54236, 4948.8203)(720.5144, 8163.06)(721.5156, 1650.9733)(706.09235, 21065.996)(707.23773, 6490.5103)(706.5255, 25553.41)(707.5279, 7951.42)(747.5226, 995.37)
PGP(16:1(9Z)/10:0(3-OH))-PAMDB006607	-0.0526066	0.0721493	-0.455387	-0.129189	-0.0172596	-0.0317612	0.0172596	-0.251383	0.258236	0.874603	0.51893	0.560394	PGP(16:1(9Z)/10:0(3-OH))-PAMDB006607	PGP(16:1(9Z)/10:0(3-OH))-PAMDB006607 [ C32 H62 O14 P2, tgt=25.72, overall=25.72 ]			(716.3757, 21861.834)(717.3784, 5960.264)
DG(15:0/14:0/0:0)-PAMDB003660	-9.57441	8.65338	12.2549	-9.4119	-9.68554	-9.39756	12.3093	12.6773	12.7413	-8.65338	-8.80164	9.55424	DG(15:0/14:0/0:0)-PAMDB003660	DG(15:0/14:0/0:0)-PAMDB003660 [ C32H62O5, tgt= ]			(508.44626, 2627.6516)(509.4481, 827.45496)(509.44672, 20117.375)(510.44934, 4130.5176)(552.4706, 9527.51)(553.474, 808.05)(535.46075, 6187.7476)
N-Acetyl-D-glucosamine(anhydrous)N-Acetylmuramyl-tripeptide-PAMDB001658	-0.485297	-0.483895	-0.633807	0.357299	-0.083499	0.10201	0.083499	-0.191796	-0.144496	0.915841	0.592839	0.762502	N-Acetyl-D-glucosamine(anhydrous)N-Acetylmuramyl-tripeptide-PAMDB001658	N-Acetyl-D-glucosamine(anhydrous)N-Acetylmuramyl-tripeptide-PAMDB001658 [ C34 H54 N6 O19, tgt=47.76, overall=47.76 ]			(868.3563, 1228.3401)(851.38354, 166438.72)(852.3864, 73823.805)(853.38794, 13987.645)(854.3878, 220.78)
Phenyl-Leucine_BMDB63628	-22.1133	0.0197392	-0.0197392	0.859882	0.501715	0.7209	-1.03477	0.145311	-0.936937	-0.0353413	-0.456114	0.325737	Phenyl-Leucine_BMDB63628	Phenyl-Leucine_BMDB63628 [ C12H17NO2, tgt= ]			(208.12758, 252742.5)(209.13033, 18804.53)(213.10577, 3204.703)
PE(14:0/12:0)-PAMDB002005	-0.366112	-0.292303	-0.843826	-0.145761	-0.230135	-0.029438	0.374624	0.267141	0.029438	0.826031	1.10939	0.718037	PE(14:0/12:0)-PAMDB002005	PE(14:0/12:0)-PAMDB002005 [ C31 H62 N O8 P, tgt=90.01, overall=90.01 ]			(631.4773, 191.41)(609.4496, 197950.42)(610.45245, 63076.52)(611.4577, 12731.375)(612.46387, 847.44995)(613.47766, 7508.214)
L-leucyl-L-proline_BMDB11175	-19.2064	-0.28203	-19.5351	0.189054	0.0063839	-19.0295	-0.0063839	-0.143021	0.0341206	0.977589	0.383167	1.06476	L-leucyl-L-proline_BMDB11175	L-leucyl-L-proline_BMDB11175 [ C11 H20 N2 O3, tgt=68.01, overall=68.01 ]			(211.14006, 34281.082)(212.14314, 1662.3179)
1-Acyl-sn-glycero-3-phosphoethanolamine(N-C18:1)-PAMDB001528	0.448438	-0.0730371	-0.276231	0.235929	-0.0586729	0.0586729	-0.445041	-0.434125	-0.451621	0.389846	0.344615	0.606853	1-Acyl-sn-glycero-3-phosphoethanolamine(N-C18:1)-PAMDB001528	1-Acyl-sn-glycero-3-phosphoethanolamine(N-C18:1)-PAMDB001528 [ C23 H43 N O7 P, tgt=44.03, overall=44.03 ]			(476.29715, 18509.951)(477.2999, 2021.0366)
PGP(10:0(3-OH)/12:0)-PAMDB006531	0.349423	-0.127257	3.33642	3.55506	-0.400006	-0.339084	-0.746964	3.11344	-0.976924	-0.290065	2.44031	0.127257	PGP(10:0(3-OH)/12:0)-PAMDB006531	PGP(10:0(3-OH)/12:0)-PAMDB006531 [ C28 H56 O14 P2, tgt=88.93, overall=88.93 ]			(682.351, 70946.56)(683.35345, 19622.76)(684.3554, 1520.641)
Eicosadienoic acid_BMDB05060	-0.00584888	-0.203692	-0.459077	-0.00923634	-0.00923634	-0.203263	0.60562	0.00584888	0.617576	1.6489	0.739961	1.46798	Eicosadienoic acid_BMDB05060	Eicosadienoic acid_BMDB05060 [ C20 H36 O2, tgt=74.57, overall=74.57 ]			(308.27386, 86860.54)(309.27655, 9550.629)(335.27338, 193873.88)(336.2763, 26347.35)
PE(15:0/17:0cycw7c)-PAMDB002009	0.739263	0.121028	0.126719	1.85193	-0.121028	-0.160155	-2.01349	-1.6871	-0.156909	-0.763692	0.497434	0.320834	PE(15:0/17:0cycw7c)-PAMDB002009	PE(15:0/17:0cycw7c)-PAMDB002009 [ C38 H74 N O8 P, tgt=78.91, overall=78.91 ]			(705.4061, 8891.826)(705.5334, 2825.9402)(685.52344, 1914.39)(686.5255, 1397.51)(706.5249, 5771.09)(689.5399, 4768.19)(703.5377, 52381.414)(704.5398, 16941.92)(708.49927, 121000.734)(709.50195, 47148.008)(710.504, 7441.666)
1-Acyl-sn-glycero-3-phosphoethanolamine(N-C14:0)-PAMDB001523	-0.449111	-0.686578	-1.10122	-0.546407	-0.760573	-0.29787	0.345361	0.476121	0.29787	1.01376	0.614026	1.16804	1-Acyl-sn-glycero-3-phosphoethanolamine(N-C14:0)-PAMDB001523	1-Acyl-sn-glycero-3-phosphoethanolamine(N-C14:0)-PAMDB001523 [ C19 H40 N O7 P, tgt=74.60, overall=74.60 ]			(427.2715, 8557.595)(428.27405, 1309.6725)(427.2724, 5975.76)(428.2748, 697.6)(430.23636, 701343.44)(431.23926, 141801.67)(432.24072, 15412.882)(433.2435, 598.32)
PS(12:0/14:0(3-OH))-PAMDB003959	10.2384	9.77438	9.71506	-8.66798	8.05598	-8.65365	8.50859	-8.75393	7.90947	-7.90947	-8.05773	-7.94076	PS(12:0/14:0(3-OH))-PAMDB003959	PS(12:0/14:0(3-OH))-PAMDB003959 [ C32 H60 N O11 P, tgt=61.77, overall=61.77 ]			(647.37866, 10765.544)(648.38165, 1574.8334)
Citraconic acid_BMDB00634	0.118712	1.97829	0.972098	-16.6312	-16.9048	-16.6169	-0.118712	0.471726	0.842763	-15.8727	0.775125	-15.904	Citraconic acid_BMDB00634	Citraconic acid_BMDB00634 [ C5 H6 O4, tgt=14.50, overall=14.50 ]			(148.05728, 6898.417)(130.04694, 3526.8242)(157.02136, 122365.1)(158.02429, 3252.4648)
PS(16:0/12:0)-PAMDB006446	0.903001	0.347692	-0.571225	-0.0174932	-0.193004	0.0174932	-0.343833	-0.43706	-0.666453	0.236081	0.511716	0.813474	PS(16:0/12:0)-PAMDB006446	PS(16:0/12:0)-PAMDB006446 [ C34 H66 N O10 P, tgt=90.31, overall=90.31 ]			(680.4656, 26378.855)(681.4682, 7607.76)(661.4243, 1119.4401)(662.4267, 656.58)(663.4431, 1461680.5)(664.4467, 650247.9)(665.4494, 132941.98)(666.4509, 12079.339)(699.5014, 2350.34)(680.4675, 20213.959)(681.4701, 6779.0703)(685.4231, 52858.996)(686.42584, 18492.771)(687.4276, 2256.47)
L-Homocysteine-PAMDB000067	17.4983	16.2188	-0.803545	-0.312298	-0.585938	-0.29796	16.7599	-0.398239	-0.384954	0.446217	0.29796	0.414928	L-Homocysteine-PAMDB000067	L-Homocysteine-PAMDB000067 [ C4 H9 N O2 S, tgt=44.46, overall=44.46 ]			(137.04245, 1140.8049)(136.0589, 9472.7)(158.02393, 9129.09)
alpha-D-Glucose-PAMDB000492	-0.00323677	2.45831	1.18019	0.200661	-19.6332	-0.349163	-1.30865	-0.313826	0.00323677	-0.229916	2.15466	0.133585	alpha-D-Glucose-PAMDB000492	alpha-D-Glucose-PAMDB000492 [ C6 H12 O6, tgt=53.01, overall=53.01 ]			(180.15381, 46548.36)(181.26663, 4698.748)(185.0746, 18681.15)(162.0514, 4337.51)(183.0983, 772.99)(208.06924, 4089.6802)
Glucose6-phosphate-PAMDB000372	-0.831249	18.568	17.8579	-0.668741	-0.942381	-0.654404	-0.82037	17.3699	17.7674	0.0897732	-0.0584831	0.058485	Glucose6-phosphate-PAMDB000372	Glucose6-phosphate-PAMDB000372 [ C6 H13 O9 P, tgt=48.78, overall=48.78 ]			(261.03217, 2155.51)(260.04822, 28408.873)(261.54883, 695.8)(262.0468, 497.13)(283.01324, 1107.245)
L-Valine_BMDB00883	-22.4393	-0.986188	-22.768	0.60621	0.374049	0.92492	-2.04019	-0.263583	0.0364866	2.84557	-0.0364866	4.2348	L-Valine_BMDB00883	L-Valine_BMDB00883 [ C5H11NO2, tgt= ]			(140.0652, 5970.663)(100.0739, 189289.34)(101.0769, 6596.53)(118.0843, 682121.6)(119.08698, 28249.135)(120.088394, 1858.9141)
PS(16:0/12:0(3-OH))-PAMDB003988	-1.33434	-1.77509	-2.12159	-0.164362	0.0563793	-0.126736	1.00172	-0.0563793	1.12494	1.86458	0.899292	1.42838	PS(16:0/12:0(3-OH))-PAMDB003988	PS(16:0/12:0(3-OH))-PAMDB003988 [ C34 H64 N O11 P, tgt=55.18, overall=55.18 ]			(675.40894, 8799.613)(676.4118, 1155.71)(696.4681, 680.57)(699.39417, 54369.95)(700.39655, 14441.943)(701.39886, 2146.505)
CDP-DG(10:0(3-OH)/12:0)-PAMDB006749	18.1503	19.9453	-1.23412	19.3711	20.352	18.2501	-0.894499	-0.828812	-0.815527	0.0156441	-0.132612	-0.0156441	CDP-DG(10:0(3-OH)/12:0)-PAMDB006749	CDP-DG(10:0(3-OH)/12:0)-PAMDB006749 [ C34 H61 N3 O16 P2, tgt=46.04, overall=46.04 ]			(851.38184, 160704.4)(852.38477, 71746.91)(853.3862, 13901.889)
DG(12:0(3-OH)/19:0cycv8c/0:0)-PAMDB006877	-0.905378	24.642	-1.23412	23.8852	24.5187	23.974	-0.894499	-0.828812	23.9336	0.0156441	-0.132612	-0.0156441	DG(12:0(3-OH)/19:0cycv8c/0:0)-PAMDB006877	DG(12:0(3-OH)/19:0cycv8c/0:0)-PAMDB006877 [ C34H64O6, tgt= ]			(570.4626, 458081.47)(571.46545, 151237.45)(572.4753, 108815.555)(573.4789, 32702.625)(574.482, 3296.2825)(572.4767, 38356.11)(573.479, 12328.41)(574.4757, 2538.81)(575.4916, 82115.87)(586.4898, 3599.14)(594.86316, 4970.6396)(595.86615, 965.42596)(596.47736, 141536.0)(597.48, 45054.684)
PG(10:0(3-OH)/18:1(9Z))-PAMDB004032	0.904306	0.346188	-0.574421	-0.0171738	-0.195021	0.0171738	-0.342915	-0.430479	-0.659021	0.245241	0.516735	0.813459	PG(10:0(3-OH)/18:1(9Z))-PAMDB004032	PG(10:0(3-OH)/18:1(9Z))-PAMDB004032 [ C34 H65 O11 P, tgt=46.61, overall=46.61 ]			(685.4231, 53497.215)(686.42584, 18731.459)(662.4268, 630.6434)(665.1973, 788236.44)(664.445, 838546.1)(665.4479, 181437.12)(666.44965, 17845.559)(680.4672, 21475.63)(681.47, 7367.1133)
LPA(18:0/0:0)-PAMDB006218	-22.0982	-1.35468	-22.4269	-0.445898	-0.655983	-0.212893	0.212893	0.267872	0.41028	1.39057	1.02669	1.21997	LPA(18:0/0:0)-PAMDB006218	LPA(18:0/0:0)-PAMDB006218 [ C21H43O7P, tgt= ]			(461.26434, 133677.45)(462.26605, 13927.18)
Pseudomonasquinolonesignal-PAMDB100069	-0.0730972	0.563881	-18.4164	0.0839901	0.232895	0.454533	-18.0768	0.995279	-17.9978	0.0211201	-17.3149	-0.0211201	Pseudomonasquinolonesignal-PAMDB100069	Pseudomonasquinolonesignal-PAMDB100069 [ C16 H21 N O2, tgt=9.56, overall=9.56 ]			(260.15723, 12213.7)(261.41254, 794.5725)(262.1722, 1821.91)(246.1648, 325.84668)(260.15775, 11486.628)(261.1578, 1987.59)(245.50127, 718.5267)(282.1984, 1935.4033)(264.18872, 130309.055)(265.1364, 405.33)
2-Aminobenzoicacid-PAMDB000262	-0.0407791	3.64515	3.44812	0.536722	-0.217329	-17.4373	0.760218	-0.592047	0.0407791	-16.6931	2.46909	-16.7244	2-Aminobenzoicacid-PAMDB000262	2-Aminobenzoicacid-PAMDB000262 [ C7 H7 N O2, tgt=44.15, overall=44.15 ]			(137.8839, 23907.04)(139.05515, 1676.435)(138.0521, 50055.223)(139.055, 4283.83)(123.05278, 4136.791)(124.0559, 592.95)(160.0935, 5451.02)(142.0833, 1233.06)(165.051, 437.31)
PA(20:4(5Z8Z11Z14Z)e/2:0)-PAMDB000816	9.12064	7.90568	8.54463	-8.63291	-8.90655	-8.61857	8.26325	-8.71885	8.39236	9.1113	-8.02265	-7.90568	PA(20:4(5Z8Z11Z14Z)e/2:0)-PAMDB000816	PA(20:4(5Z8Z11Z14Z)e/2:0)-PAMDB000816 [ C25 H43 O7 P, tgt=60.35, overall=60.35 ]			(472.28076, 2686.9265)(473.07852, 2336.312)(486.2975, 5733.123)(487.3007, 559.35)(491.2409, 922.06995)
L-2-Amino-3-oxobutanoicacid-PAMDB000671	-0.138513	-0.174199	-21.312	0.500123	0.0379038	0.192557	-0.0379038	-0.0391684	-0.224019	0.817698	0.474715	0.685636	L-2-Amino-3-oxobutanoicacid-PAMDB000671	L-2-Amino-3-oxobutanoicacid-PAMDB000671 [ C4 H7 N O3, tgt=76.71, overall=76.71 ]			(119.04681, 6542.43)(102.04419, 455.32333)(135.0777, 61777.6)(136.08083, 2409.6995)(117.06762, 11649.855)
DG(19:0cycv8c/10:0(3-OH)/0:0)-PAMDB006935	-11.684	12.1081	11.3857	-11.5215	-11.7951	11.3637	11.082	10.763	10.7709	-10.763	-10.9112	-10.7943	DG(19:0cycv8c/10:0(3-OH)/0:0)-PAMDB006935	DG(19:0cycv8c/10:0(3-OH)/0:0)-PAMDB006935 [ C32H60O6, tgt= ]			(544.4482, 314594.72)(545.4509, 97255.37)(546.4527, 12600.02)(547.45966, 8487.009)(558.46265, 81996.07)(559.4653, 21385.38)(560.4621, 8649.687)(561.465, 1402.4684)(563.41754, 24435.852)(564.4202, 5189.575)(565.4204, 205.72)
PE(19:0cycv8c/12:0(3-OH))-PAMDB003908	-22.339	0.649372	0.0782738	0.654217	-0.055069	-22.1621	-22.3281	-0.372396	-0.493036	0.314081	0.168108	0.055069	PE(19:0cycv8c/12:0(3-OH))-PAMDB003908	PE(19:0cycv8c/12:0(3-OH))-PAMDB003908 [ C36H70NO9P, tgt= ]			(694.48126, 269.27)(675.4837, 1745.582)(674.4916, 1835.49)(709.51447, 27347.695)(710.51685, 5663.1885)
Glycogen-PAMDB001740	-0.172152	-0.450317	0.728107	-0.79744	-1.58963	0.337603	0.172152	-0.17223	-0.365667	0.350164	1.11208	1.23999	Glycogen-PAMDB001740	Glycogen-PAMDB001740 [ C24 H42 O21, tgt=25.62, overall=25.62 ]			(667.2166, 20390.033)(668.2188, 3035.5994)(649.20593, 11446.645)(650.2089, 1958.475)
Oxoglutaricacid-PAMDB000623	-1.39791	0.189894	0.734852	-2.09457	-3.35071	-0.189894	-1.32903	0.458508	0.835703	-1.56925	2.70537	0.83885	Oxoglutaricacid-PAMDB000623	Oxoglutaricacid-PAMDB000623 [ C5 H6 O5, tgt=46.66, overall=46.66 ]			(147.02216, 8202.966)(129.01941, 65572.695)(130.01892, 3000.553)(169.06685, 1033.7225)(172.0143, 9584.608)(173.02164, 2541.4863)
Dimethyl-L-arginine_BMDB01539	-20.8408	0.244855	0.743999	1.45077	0.84958	0.815963	-1.48879	-0.141961	-1.57261	-0.341918	-0.179952	0.141961	Dimethyl-L-arginine_BMDB01539	Dimethyl-L-arginine_BMDB01539 [ C8H18N4O2, tgt= ]			(202.13979, 11948.793)(203.1423, 729.90497)(184.12994, 105007.33)(185.13283, 7432.2974)(186.14575, 134910.5)(187.14867, 9277.148)(222.181, 9922.955)(223.1843, 391.4)(225.1267, 3218.9998)(208.12755, 173974.27)(209.13028, 12381.35)
24-diacetylphloroglucinol-PAMDB100040	-0.169678	20.0364	19.9768	-0.00716972	-0.280809	0.00716782	-0.158798	-0.093111	-0.0798264	0.751345	0.603088	0.720057	24-diacetylphloroglucinol-PAMDB100040	24-diacetylphloroglucinol-PAMDB100040 [ C10 H10 O5, tgt= ]			(210.0567, 38036.57)(211.05975, 410.44)
L-Threonine-PAMDB000068	-0.254191	-0.255809	-0.384063	0.469695	0.00612164	0.143296	-0.00303364	0.00303364	-0.168256	0.901908	-2.79163	0.742696	L-Threonine-PAMDB000068	L-Threonine-PAMDB000068 [ C4 H9 N O3, tgt=64.58, overall=64.58 ]			(121.0624, 322.93)(103.05218, 8519.207)(104.05967, 5757.23)(119.0835, 552784.5)(120.08655, 36794.79)(124.0377, 47870.55)(125.0403, 862.67)
PE(12:0(3-OH)/17:0cycw7c)-PAMDB003857	0.96989	0.408732	-0.503484	-7.5462	-0.108088	0.108088	-0.254962	-0.34072	-0.568408	0.344041	0.620467	0.91237	PE(12:0(3-OH)/17:0cycw7c)-PAMDB003857	PE(12:0(3-OH)/17:0cycw7c)-PAMDB003857 [ C34 H66 N O9 P, tgt=65.65, overall=65.65 ]			(663.4424, 1465290.9)(664.44653, 713105.25)(665.4493, 148740.23)(666.45087, 13995.807)(647.4452, 1678.61)(648.4483, 372.98)(647.4541, 16276.085)(648.4485, 11527.98)(681.47015, 7294.726)(686.42596, 18924.63)(687.42773, 2514.4688)
PG(18:0/18:0)-PAMDB001674	16.8989	16.2212	-1.15999	-0.668741	-0.942381	19.0145	-0.82037	19.2017	-0.741398	20.743	-0.0584831	0.058485	PG(18:0/18:0)-PAMDB001674	PG(18:0/18:0)-PAMDB001674 [ C42 H83 O10 P, tgt=36.40, overall=36.40 ]			(784.5827, 10124.91)(761.32495, 18663.797)(762.328, 5729.0674)(762.5826, 1660.17)(763.591, 41179.96)(764.5938, 15999.71)(765.5961, 728.35)(784.2324, 8029.904)(785.23517, 2090.22)(786.5799, 938.77)
PG(14:0/17:0cycw7c)-PAMDB002029	2.12615	0.0270386	-0.657528	0.796513	-0.927853	0.0827198	-0.334435	-0.799709	-0.0270386	0.0872555	0.787495	-0.149345	PG(14:0/17:0cycw7c)-PAMDB002029	PG(14:0/17:0cycw7c)-PAMDB002029 [ C38 H73 O10 P, tgt=64.39, overall=64.39 ]			(721.4924, 11758.774)(722.498, 4717.005)(723.5023, 905.73)(709.011, 80592.445)(709.5015, 62829.723)(742.20575, 43645.3)(743.5274, 982.51)(720.518, 9837.235)(721.5167, 1994.0442)(725.46686, 793.2025)
CDP-DG(16:1(9Z)/18:0)-PAMDB003757	-0.126179	16.4722	-0.454918	0.0363293	-0.23731	0.0506668	-0.115299	-0.049612	-0.0363274	17.6155	19.8952	17.6343	CDP-DG(16:1(9Z)/18:0)-PAMDB003757	CDP-DG(16:1(9Z)/18:0)-PAMDB003757 [ C46 H83 N3 O15 P2, tgt= ]			(979.5456, 1956.58)(997.559, 8719.345)(998.5616, 5412.7354)
CoproporphyrinogenI-PAMDB000442	-0.34768	-0.311791	0.70575	-21.9631	-0.382207	-21.9488	0.900146	-0.0778036	0.733504	1.91139	0.0778036	1.86657	CoproporphyrinogenI-PAMDB000442	CoproporphyrinogenI-PAMDB000442 [ C36 H44 N4 O8, tgt=40.86, overall=40.86 ]			(684.3649, 1954.363)(669.76013, 1812.8767)(670.6002, 5370.784)(671.3175, 1600.3159)(666.3534, 2875.77)
PG(16:0/16:1(9Z))-PAMDB000792	2.12615	0.0270386	-0.657528	0.796513	-0.927853	0.0827198	-0.334435	-0.799709	-0.0270386	0.0872555	0.787495	-0.149345	PG(16:0/16:1(9Z))-PAMDB000792	PG(16:0/16:1(9Z))-PAMDB000792 [ C38 H73 O10 P, tgt=64.39, overall=64.39 ]			(721.4924, 11758.774)(722.498, 4717.005)(723.5023, 905.73)(709.011, 80592.445)(709.5015, 62829.723)(742.20575, 43645.3)(743.5274, 982.51)(720.518, 9837.235)(721.5167, 1994.0442)(725.46686, 793.2025)
PGP(12:0(3-OH)/15:0)-PAMDB006552	18.1451	18.8849	-1.23412	18.3538	18.1498	16.0798	-0.894499	-0.828812	-0.815527	0.0156441	-0.132612	-0.0156441	PGP(12:0(3-OH)/15:0)-PAMDB006552	PGP(12:0(3-OH)/15:0)-PAMDB006552 [ C33 H66 O14 P2, tgt=24.06, overall=24.06 ]			(768.4494, 534.63)(750.44, 34958.754)(751.4423, 12615.88)(752.4464, 957.52)
N-Acetyl-L-alanine-PAMDB000272	8.89374	8.74601	8.0991	8.85716	8.79638	8.78294	-9.00925	-8.94356	-8.93028	-8.0991	-8.24736	-8.13039	N-Acetyl-L-alanine-PAMDB000272	N-Acetyl-L-alanine-PAMDB000272 [ C5 H9 N O3, tgt=47.17, overall=47.17 ]			(115.051796, 5270.5103)(149.09294, 1591.7134)(131.08243, 8206.356)
DG(16:0/10:0/0:0)-PAMDB003667	1.94656	-0.0570612	0.00242138	1.98586	1.10804	-0.00242138	-24.2265	-0.0933123	-24.1475	-0.626142	0.00878239	0.0269175	DG(16:0/10:0/0:0)-PAMDB003667	DG(16:0/10:0/0:0)-PAMDB003667 [ C29 H56 O5, tgt=50.11, overall=50.11 ]			(484.3995, 4134.9663)(466.39096, 398421.44)(467.39505, 158832.7)(468.39706, 16669.531)(469.39618, 2325.3398)(467.401, 216944.5)(468.4048, 61902.332)(469.4079, 6116.1196)(507.3872, 110.37)(491.39923, 10773.52)(492.65567, 26691.045)(493.66638, 50125.844)(494.41873, 14238.109)
Methionyl-Alanine_BMDB62251	-0.474806	22.7324	21.4788	-0.312298	17.5636	-0.29796	-0.463926	-0.398239	-0.384954	0.446217	0.29796	0.414928	Methionyl-Alanine_BMDB62251	Methionyl-Alanine_BMDB62251 [ C8 H16 N2 O3 S, tgt=71.84, overall=71.84 ]			(224.0997, 2524.64)(204.08235, 2091.795)(240.1158, 1828.85)(220.114, 209968.78)(221.1169, 12697.135)(222.10904, 5445.74)(243.0825, 17921.79)
PE(12:0(3-OH)/19:iso)-PAMDB003860	0.235799	-0.126658	-0.489991	0.0582933	-0.0475607	-0.0469294	-0.187825	-0.451467	0.0469294	0.813626	0.879359	1.07755	PE(12:0(3-OH)/19:iso)-PAMDB003860	PE(12:0(3-OH)/19:iso)-PAMDB003860 [ C36 H72 N O9 P, tgt=40.78, overall=40.78 ]			(676.4866, 24043.521)(677.49603, 8283.547)(678.4972, 3066.845)(713.5542, 15276.547)(714.55664, 4631.048)(720.6811, 9633.075)(721.5146, 2434.0923)
Ubiquinol-1-PAMDB001968	0.734232	-0.182819	-0.161198	0.469292	-0.0795574	0.00278091	0.183407	-0.00278091	-0.144733	0.603548	-0.896345	0.336679	Ubiquinol-1-PAMDB001968	Ubiquinol-1-PAMDB001968 [ C14 H20 O4, tgt=27.81, overall=27.81 ]			(235.12622, 9789.229)(252.48865, 6597.4956)(253.1547, 454.17)
PG(14:0(3-OH)/10:0)-PAMDB004057	19.0301	19.4104	18.6038	-0.312298	-0.585938	-0.29796	-0.463926	-0.398239	-0.384954	0.446217	0.29796	0.414928	PG(14:0(3-OH)/10:0)-PAMDB004057	PG(14:0(3-OH)/10:0)-PAMDB004057 [ C30 H59 O11 P, tgt=39.06, overall=39.06 ]			(644.42865, 4355.4)(626.4005, 12244.133)(627.4037, 495.695)(651.3652, 177.45)
DG(14:0/18:1(9Z)/0:0)-PAMDB003656	-2.25225	0.402766	0.0201139	-0.266416	1.67802	0.015687	0.217166	0.0192785	-0.015687	-22.9024	-4.94599	-22.9337	DG(14:0/18:1(9Z)/0:0)-PAMDB003656	DG(14:0/18:1(9Z)/0:0)-PAMDB003656 [ C35 H66 O5, tgt=42.21, overall=42.21 ]			(549.36774, 64040.945)(550.48047, 19636.568)(551.49286, 80912.83)(552.4957, 22052.607)(553.4981, 3906.565)(549.4751, 8676.65)(550.485, 1941.13)(571.5276, 543.58)(572.1679, 120156.36)(573.2536, 37213.152)(574.48206, 9298.368)(575.4905, 18642.02)(576.494, 4054.31)
Pro-Ile_BMDB62574	-19.2064	-0.28203	-19.5351	0.189054	0.0063839	-19.0295	-0.0063839	-0.143021	0.0341206	0.977589	0.383167	1.06476	Pro-Ile_BMDB62574	Pro-Ile_BMDB62574 [ C11H20N2O3, tgt= ]			(211.14006, 34281.082)(212.14314, 1662.3179)
5-Methyltetrahydropteroyltri-L-glutamicacid-PAMDB000245	0.81048	-3.13612	0.0741367	0.313786	0.237663	0.28219	0.01968	-0.01968	-1.47229	-23.5529	-0.459421	-23.5842	5-Methyltetrahydropteroyltri-L-glutamicacid-PAMDB000245	5-Methyltetrahydropteroyltri-L-glutamicacid-PAMDB000245 [ C25 H36 N8 O12, tgt=64.84, overall=64.84 ]			(659.2765, 517699.5)(660.27924, 166703.11)(661.2808, 22934.486)(662.28204, 1456.7299)(643.2775, 9759.78)(644.28, 1879.57)
PGP(19:0cycv8c/18:1(9Z))-PAMDB006640	0.0870791	0.141215	-0.0913172	-0.248593	-0.0870791	-0.0979204	0.241103	-1.31724	0.506513	0.721038	-1.44143	0.151038	PGP(19:0cycv8c/18:1(9Z))-PAMDB006640	PGP(19:0cycv8c/18:1(9Z))-PAMDB006640 [ C43 H82 O13 P2, tgt=38.31, overall=38.31 ]			(868.50116, 33811.156)(869.5037, 12158.159)(870.505, 1823.7802)
PE(16:1(9Z)/18:1(11Z))-PAMDB000762	1.5334	-0.224635	-1.83074	-19.3594	4.37516	-19.3451	-19.511	-0.882234	0.224635	5.07224	1.82266	3.73239	PE(16:1(9Z)/18:1(11Z))-PAMDB000762	PE(16:1(9Z)/18:1(11Z))-PAMDB000762 [ C39 H74 N O8 P, tgt=64.14, overall=64.14 ]			(718.5207, 5702.0566)(719.02576, 3469.81)(720.0226, 3380.645)(721.5189, 941.68)(703.5142, 57.67)(717.8532, 7102.6035)(719.5156, 4751.25)(721.5176, 1366.35)(700.2628, 2930.8477)(700.8481, 5851.3535)(701.85504, 13932.993)(702.861, 7247.9766)(703.86884, 18809.244)(704.53625, 9225.59)(735.5534, 8023.929)(736.8048, 2372.0176)(743.42004, 26596.29)(743.5256, 2651.31)(744.5384, 4914.14)(721.4923, 9818.51…
2-Oxo-4-methylthiobutanoicacid-PAMDB000418	0.180507	-0.373054	-0.552783	-0.0336542	-25.5914	0.0336542	-0.277396	0.248607	-0.315404	1.15344	0.259204	1.12247	2-Oxo-4-methylthiobutanoicacid-PAMDB000418	2-Oxo-4-methylthiobutanoicacid-PAMDB000418 [ C5 H8 O3 S, tgt=44.99, overall=44.99 ]			(149.02109, 1388220.4)(151.02534, 5178.4976)(175.01227, 708.8775)
Lincomycin_BMDB63638	0.0908756	-0.507067	-0.197254	-0.214947	-0.300331	0.450268	-0.0765095	-0.263851	0.0765095	0.996885	0.403149	1.12409	Lincomycin_BMDB63638	Lincomycin_BMDB63638 [ C18 H34 N2 O6 S, tgt=66.40, overall=66.40 ]			(406.21448, 22016.297)(407.21725, 3032.078)(388.2034, 2143.0698)(430.2115, 895.72003)(432.19373, 8828.715)(433.19623, 913.065)(415.203, 25543.55)(416.20544, 3575.33)
Nonadecanoic acid_BMDB00772	1.91902	1.44598	0.0724506	1.83577	1.48979	1.63236	-0.822121	-0.0724506	-1.14072	-0.190727	-0.913656	-0.157059	Nonadecanoic acid_BMDB00772	Nonadecanoic acid_BMDB00772 [ C19 H38 O2, tgt=73.63, overall=73.63 ]			(284.2895, 252473.33)(285.29224, 35770.992)(284.29062, 3361765.2)(285.29395, 616484.2)(286.2963, 44198.977)(298.3053, 241249.64)(299.30798, 35623.406)(300.3102, 1751.7567)(306.27063, 474.52502)
Uracil-PAMDB000126	16.2605	16.9889	18.2891	-0.312298	-0.585938	-0.29796	-0.463926	-0.398239	-0.384954	0.446217	0.29796	0.414928	Uracil-PAMDB000126	Uracil-PAMDB000126 [ C4 H4 N2 O2, tgt=25.07, overall=25.07 ]			(113.03247, 9144.224)(112.048195, 6886.3364)
D-Erythro-3-Methylmalate-PAMDB000985	0.241686	2.26329	1.72281	-0.279648	-0.989718	0.483755	-0.241686	0.724886	-0.588007	0.407782	-1.07007	-17.5696	D-Erythro-3-Methylmalate-PAMDB000985	D-Erythro-3-Methylmalate-PAMDB000985 [ C5 H8 O5, tgt=70.99, overall=70.99 ]			(150.45256, 17645.621)(152.0534, 721.9)(166.25124, 42548.99)(167.40631, 2711.1365)(148.05728, 6882.785)(157.02107, 42175.01)(158.02429, 4385.965)
trans-8-Octadecenoic acid_BMDB62115	-28.7936	1.10453	-0.0868387	0.10583	0.453221	0.441457	0.000628471	-28.7171	-0.000628471	-27.8726	0.594729	-27.9039	trans-8-Octadecenoic acid_BMDB62115	trans-8-Octadecenoic acid_BMDB62115 [ C18 H34 O2, tgt=94.89, overall=94.89 ]			(265.24832, 582924.2)(266.2512, 96426.68)(267.25415, 5369.341)(268.258, 26637.44)(269.2608, 3552.69)(282.27493, 1.1280462E7)(283.2777, 2425728.2)(284.28137, 238287.52)(285.28427, 11163.582)
PGP(18:2(9Z12Z)/18:2(9Z12Z))-PAMDB006287	0.16367	0.21003	-0.0214863	-0.146851	-0.00565529	0.00565529	0.323685	-1.17045	0.323303	0.687702	-1.26657	-18.5937	PGP(18:2(9Z12Z)/18:2(9Z12Z))-PAMDB006287	PGP(18:2(9Z12Z)/18:2(9Z12Z))-PAMDB006287 [ C42 H76 O13 P2, tgt=43.99, overall=43.99 ]			(868.50104, 34212.75)(869.50366, 12284.432)(870.505, 1784.1456)
2-Amino-4-hydroxy-6-hydroxymethyl-78-dihydropteridine-PAMDB001880	10.1105	9.05545	9.15208	-8.90707	8.78355	10.1776	8.14856	-8.99301	-8.97973	-8.14856	-8.29682	-8.17985	2-Amino-4-hydroxy-6-hydroxymethyl-78-dihydropteridine-PAMDB001880	2-Amino-4-hydroxy-6-hydroxymethyl-78-dihydropteridine-PAMDB001880 [ C7 H9 N5 O2, tgt=47.55, overall=47.55 ]			(177.0667, 6715.608)(182.58405, 1094.53)(213.10583, 1321.6466)(195.0953, 1718.76)(220.06877, 1287.8141)
Palmitoleic acid_BMDB03229	0.834272	-1.11904	0.522583	1.21881	1.0096	1.30811	-0.615374	-0.395277	-0.627205	-0.0630321	0.0630321	-0.140188	Palmitoleic acid_BMDB03229	Palmitoleic acid_BMDB03229 [ C16 H30 O2, tgt=71.54, overall=71.54 ]			(277.2119, 710736.44)(278.21484, 117515.305)(279.22162, 10447.88)(237.2165, 2614.724)(255.22687, 1764.4333)(259.2009, 36437.95)(260.20374, 3981.9187)(261.2147, 255.45)
Acetylcysteine_BMDB01890	-0.168438	-3.54151	-3.42865	-0.480894	-0.93766	0.219059	-0.0199814	0.0199814	0.0794315	0.507866	0.803471	0.977139	Acetylcysteine_BMDB01890	Acetylcysteine_BMDB01890 [ C5 H9 N O3 S, tgt=41.08, overall=41.08 ]			(147.02014, 2631.125)(184.97226, 101359.84)(186.0665, 64936.26)(163.05684, 23499.85)(190.01611, 13688.269)
Isovalerylcarnitine_BMDB00688	0.764664	2.65286	1.42651	-20.7546	-1.67068	0.671062	-20.9062	0.459465	-0.0718822	0.0718822	-20.1443	-20.0274	Isovalerylcarnitine_BMDB00688	Isovalerylcarnitine_BMDB00688 [ C12 H23 N O4, tgt=78.12, overall=78.12 ]			(246.1655, 168943.78)(247.16832, 14763.728)(248.1697, 1380.35)(229.15894, 40819.395)(229.15837, 4830.5)(250.13708, 88280.055)(251.13977, 6956.483)
2-Acyl-sn-glycero-3-phosphoglycerol(N-C18:1)-PAMDB001561	0.530129	0.310418	0.354016	-0.366399	-0.26024	-0.378777	0.26024	-18.5442	-0.294065	1.62322	-17.848	0.922105	2-Acyl-sn-glycero-3-phosphoglycerol(N-C18:1)-PAMDB001561	2-Acyl-sn-glycero-3-phosphoglycerol(N-C18:1)-PAMDB001561 [ C24 H46 O9 P, tgt=75.05, overall=75.05 ]			(532.2757, 17967.553)(533.2781, 2106.186)(534.27405, 1149.266)
Citricacid-PAMDB000034	-0.0429115	3.47925	3.288	-17.951	-18.2247	0.906315	0.0429115	2.00931	2.50661	-17.1925	-17.3408	-17.2238	Citricacid-PAMDB000034	Citricacid-PAMDB000034 [ C6 H8 O7, tgt=43.47, overall=43.47 ]			(175.01619, 17694.09)(193.03044, 3874.8035)(210.05661, 13867.612)(211.05975, 388.815)(215.44235, 16202.124)(217.5182, 2327.1401)
CDP-DG(12:0/10:0(3-OH))-PAMDB006771	18.1503	19.9453	-1.23412	19.3711	20.352	18.2501	-0.894499	-0.828812	-0.815527	0.0156441	-0.132612	-0.0156441	CDP-DG(12:0/10:0(3-OH))-PAMDB006771	CDP-DG(12:0/10:0(3-OH))-PAMDB006771 [ C34 H61 N3 O16 P2, tgt=46.04, overall=46.04 ]			(851.38184, 160704.4)(852.38477, 71746.91)(853.3862, 13901.889)
PS(14:0(3-OH)/17:0cycw7c)-PAMDB003971	18.1236	17.5362	-0.498417	-0.00716972	-0.280809	0.00716782	-0.158798	-0.093111	-0.0798264	0.751345	0.603088	0.720057	PS(14:0(3-OH)/17:0cycw7c)-PAMDB003971	PS(14:0(3-OH)/17:0cycw7c)-PAMDB003971 [ C37 H68 N O11 P, tgt=38.03, overall=38.03 ]			(717.4426, 9497.175)(718.4457, 1713.0901)
PE(16:1(9Z)/10:0(3-OH))-PAMDB003895	0.0261774	0.650851	-0.0261774	-17.9423	-1.02001	-1.30135	-1.4799	0.659135	1.00212	2.08504	1.54178	-17.2151	PE(16:1(9Z)/10:0(3-OH))-PAMDB003895	PE(16:1(9Z)/10:0(3-OH))-PAMDB003895 [ C31 H60 N O9 P, tgt=49.32, overall=49.32 ]			(625.39716, 32944.117)(626.4001, 10107.3)(627.4022, 811.53)(625.3987, 29470.27)(626.40137, 8921.395)(627.4052, 179.86)(644.15985, 30706.541)(643.4272, 16415.998)(644.4292, 5583.65)(623.4417, 18715.16)(624.4442, 2224.6526)(647.37964, 11417.975)(648.3823, 1688.5051)
Ethyl isovalerate_BMDB30028	0.538918	-0.15587	-0.0142155	0.516996	0.0260296	0.154041	-0.599262	-0.115345	-0.800512	0.0142155	-0.360573	0.0984402	Ethyl isovalerate_BMDB30028	Ethyl isovalerate_BMDB30028 [ C7 H14 O2, tgt=99.33, overall=99.33 ]			(153.08818, 126891.836)(154.09132, 6945.293)(155.10341, 287.22498)(135.0777, 44398.812)(136.0808, 2187.1077)
L-Glutamine-PAMDB000163	0.141857	0.391394	0.421642	0.48315	-0.141857	0.396551	-16.6314	0.609003	-16.5524	-15.7212	-15.8695	-15.7525	L-Glutamine-PAMDB000163	L-Glutamine-PAMDB000163 [ C5 H10 N2 O3, tgt=42.65, overall=42.65 ]			(128.05914, 4739.607)(147.0777, 3490.75)(129.4963, 11196.64)(133.0766, 1303.51)
PE(12:0/10:0(3-OH))-PAMDB003861	0.0886583	-0.184545	-0.699069	-0.22725	-0.325126	-0.0886583	0.324327	0.207549	0.388785	1.03809	-0.316974	0.75862	PE(12:0/10:0(3-OH))-PAMDB003861	PE(12:0/10:0(3-OH))-PAMDB003861 [ C27 H54 N O9 P, tgt=67.20, overall=67.20 ]			(567.35284, 16445.752)(568.3554, 2997.4004)
2-Heptyl-4-quinolinol1-oxide-PAMDB100075	-0.0730972	0.563881	-18.4164	0.0839901	0.232895	0.454533	-18.0768	0.995279	-17.9978	0.0211201	-17.3149	-0.0211201	2-Heptyl-4-quinolinol1-oxide-PAMDB100075	2-Heptyl-4-quinolinol1-oxide-PAMDB100075 [ C16 H21 N O2, tgt=9.56, overall=9.56 ]			(260.15723, 12213.7)(261.41254, 794.5725)(262.1722, 1821.91)(246.1648, 325.84668)(260.15775, 11486.628)(261.1578, 1987.59)(245.50127, 718.5267)(282.1984, 1935.4033)(264.18872, 130309.055)(265.1364, 405.33)
PG(16:1(9Z)/16:1(9Z))-PAMDB000795	-1.87258	0.0330496	-21.2768	-20.7856	0.365495	0.693898	-0.0330496	0.623986	-20.8582	-20.027	0.480268	1.02277	PG(16:1(9Z)/16:1(9Z))-PAMDB000795	PG(16:1(9Z)/16:1(9Z))-PAMDB000795 [ C38 H71 O10 P, tgt=44.52, overall=44.52 ]			(722.4914, 1126.25)(723.4939, 360.875)(705.4967, 180.81)(721.0056, 4981.032)(722.0078, 1364.7775)(722.4885, 1991.39)(723.4911, 513.14)(704.50195, 164.20999)(719.6618, 5506.862)(721.5174, 722.45)(725.46497, 506.27197)
N-Acetyl-b-D-galactosamine-PAMDB000193	-0.905564	2.646	2.14501	-1.01048	-0.265796	-0.439197	0.265796	-0.66368	1.5894	-0.448791	2.75064	0.687589	N-Acetyl-b-D-galactosamine-PAMDB000193	N-Acetyl-b-D-galactosamine-PAMDB000193 [ C8 H15 N O6, tgt=59.76, overall=59.76 ]			(222.49411, 2184.604)(203.07765, 1104.6799)(223.09631, 3770.7798)(204.08308, 64272.707)(205.08583, 3088.29)(239.1213, 24224.25)(240.1238, 1330.34)(224.12334, 15204.597)(225.12755, 1555.215)(244.07552, 1891.0166)(245.07199, 678.75)
DG(15:0/16:0/0:0)-PAMDB003662	-0.17334	-0.647467	0.10918	-22.4331	0.512587	-22.4187	0.604517	0.482235	0.737989	0.648199	-21.8228	-0.10918	DG(15:0/16:0/0:0)-PAMDB003662	DG(15:0/16:0/0:0)-PAMDB003662 [ C34 H66 O5, tgt=38.91, overall=38.91 ]			(560.4917, 9887.47)(536.77356, 9512.443)(537.4958, 15556.68)(538.5, 1154.36)(561.505, 3919.11)(537.477, 31336.234)(538.48047, 9161.668)(577.4933, 12653.38)(578.4958, 370.78)(559.6863, 16320.871)(560.7129, 6448.615)(561.60736, 919.5829)
PS(14:0/19:0cycw8c)-PAMDB006713	-0.831249	20.5661	18.8849	-0.668741	20.0136	-0.654404	-0.82037	-0.754683	20.9897	0.0897732	-0.0584831	0.058485	PS(14:0/19:0cycw8c)-PAMDB006713	PS(14:0/19:0cycw8c)-PAMDB006713 [ C39 H72 N O10 P, tgt=16.57, overall=16.57 ]			(749.5203, 111.57)(733.5068, 383.90002)(764.5353, 1277.605)(766.5192, 3104.645)(767.5165, 296.24)
PE(14:0(3-OH)/18:1(9Z))-PAMDB003876	10.3942	11.275	10.2629	8.83929	-9.84016	-9.55218	11.4343	-9.65246	-9.63918	13.8036	-8.95626	-8.83929	PE(14:0(3-OH)/18:1(9Z))-PAMDB003876	PE(14:0(3-OH)/18:1(9Z))-PAMDB003876 [ C37 H72 N O9 P, tgt=74.02, overall=74.02 ]			(708.49756, 100809.36)(709.50085, 41175.484)(710.5029, 13668.9)(708.5005, 35169.035)(709.5032, 13214.0)(710.5049, 2022.52)(727.5337, 6270.277)(728.875, 1494.66)(729.5475, 11368.48)(706.5293, 10819.37)(707.5294, 4325.68)(716.5093, 2002.7)
N-Ethylsuccinimide-PAMDB001329	0.690928	-0.0293064	-0.161301	0.49646	-19.8681	0.482574	-0.320923	0.0293064	-0.111874	0.703451	-18.9842	0.689627	N-Ethylsuccinimide-PAMDB001329	N-Ethylsuccinimide-PAMDB001329 [ C6 H9 N O2, tgt=83.41, overall=83.41 ]			(130.92924, 42867.156)(132.0743, 117949.55)(114.06375, 4336.555)(132.09866, 8500.785)(150.05235, 33916.082)(151.05498, 975.065)
Glycerol2-phosphate-PAMDB001630	0.00381565	-0.240186	-0.206889	-0.366996	0.0539389	0.0168867	-0.00381565	-0.0103292	-0.060914	0.873414	1.23075	0.0127459	Glycerol2-phosphate-PAMDB001630	Glycerol2-phosphate-PAMDB001630 [ C3 H9 O6 P, tgt=47.82, overall=47.82 ]			(172.01434, 15180.831)(173.02118, 739.916)(156.007, 613.472)(173.02129, 4585.8315)(172.0366, 34.56)
DG(16:0/17:0cycw7c/0:0)-PAMDB006911	0.43595	1.50626	0.0709658	1.31169	-0.0709658	-0.584905	0.977351	-0.30107	0.984223	-20.3269	-20.4752	-2.3566	DG(16:0/17:0cycw7c/0:0)-PAMDB006911	DG(16:0/17:0cycw7c/0:0)-PAMDB006911 [ C36 H68 O5, tgt=54.87, overall=54.87 ]			(563.49097, 3828.8657)(565.5071, 10906.234)(566.5089, 3305.92)(604.51636, 2258.4668)(564.5221, 1957.71)(582.5135, 4578.38)(587.9288, 39369.79)(587.4952, 15057.898)(588.49677, 1683.4349)(580.5247, 7599.29)
PE(12:0(3-OH)/10:0)-PAMDB003847	0.0886583	-0.184545	-0.699069	-0.22725	-0.325126	-0.0886583	0.324327	0.207549	0.388785	1.03809	-0.316974	0.75862	PE(12:0(3-OH)/10:0)-PAMDB003847	PE(12:0(3-OH)/10:0)-PAMDB003847 [ C27 H54 N O9 P, tgt=67.20, overall=67.20 ]			(567.35284, 16445.752)(568.3554, 2997.4004)
2-methoxy-6-(all-trans-octaprenyl)phenol-PAMDB003827	-1.21172	0.867355	-0.451252	-2.76324	0.669203	0.48596	0.755493	0.510406	0.451252	-2.9379	-3.64968	-2.5555	2-methoxy-6-(all-trans-octaprenyl)phenol-PAMDB003827	2-methoxy-6-(all-trans-octaprenyl)phenol-PAMDB003827 [ C40 H58 O2, tgt=66.12, overall=66.12 ]			(570.4596, 1512.98)(554.8856, 1772.8065)(557.02155, 12017.978)(558.4622, 78024.32)(571.4686, 369029.1)(571.46576, 151095.84)(572.47314, 51249.574)(573.47675, 15561.633)(574.47986, 1051.515)(593.4321, 47304.5)(594.43427, 8207.649)(575.86554, 160149.9)(576.8683, 44226.383)(577.67694, 8156.355)(578.4346, 732.1725)
PS(12:0(3-OH)/17:0cycw7c)-PAMDB003953	0.446651	0.0849552	0.0247421	-0.2211	-0.0247421	-0.42104	0.941576	-0.623127	0.687801	2.06125	-17.1213	-17.0044	PS(12:0(3-OH)/17:0cycw7c)-PAMDB003953	PS(12:0(3-OH)/17:0cycw7c)-PAMDB003953 [ C35 H64 N O11 P, tgt=55.17, overall=55.17 ]			(688.41785, 16205.315)(689.4205, 4153.374)
PG(16:1(9Z)/12:0(3-OH))-PAMDB004088	0.904306	0.346188	-0.574421	-0.0171738	-0.195021	0.0171738	-0.342915	-0.430479	-0.659021	0.245241	0.516735	0.813459	PG(16:1(9Z)/12:0(3-OH))-PAMDB004088	PG(16:1(9Z)/12:0(3-OH))-PAMDB004088 [ C34 H65 O11 P, tgt=46.61, overall=46.61 ]			(685.4231, 53497.215)(686.42584, 18731.459)(662.4268, 630.6434)(665.1973, 788236.44)(664.445, 838546.1)(665.4479, 181437.12)(666.44965, 17845.559)(680.4672, 21475.63)(681.47, 7367.1133)
Ile-Ile-Ile-Pro_BMDB62559	1.09081	0.379068	0.519218	1.06742	0.656635	0.715012	-18.2872	-18.2215	-18.2082	-17.377	-0.379068	-17.4083	Ile-Ile-Ile-Pro_BMDB62559	Ile-Ile-Ile-Pro_BMDB62559 [ C23 H42 N4 O5, tgt=57.49, overall=57.49 ]			(458.3133, 10125.22)(436.3007, 7946.49)(461.3254, 134.59)(472.34995, 11580.442)(473.3535, 385.79)(477.73898, 2723.873)
PE(18:1(9Z)/10:0(3-OH))-PAMDB003903	0.69489	1.79023	-0.725474	-0.221883	1.85302	-0.339934	-0.741698	-1.03795	-0.64335	0.621585	0.221883	1.01346	PE(18:1(9Z)/10:0(3-OH))-PAMDB003903	PE(18:1(9Z)/10:0(3-OH))-PAMDB003903 [ C33 H64 N O9 P, tgt=60.85, overall=60.85 ]			(667.4661, 12995.5625)(668.4687, 1949.9149)
L-Threonine_BMDB00167	-0.254191	-0.255809	-0.384063	0.469695	0.00612164	0.143296	-0.00303364	0.00303364	-0.168256	0.901908	-2.79163	0.742696	L-Threonine_BMDB00167	L-Threonine_BMDB00167 [ C4 H9 N O3, tgt=64.58, overall=64.58 ]			(121.0624, 322.93)(103.05218, 8519.207)(104.05967, 5757.23)(119.0835, 552784.5)(120.08655, 36794.79)(124.0377, 47870.55)(125.0403, 862.67)
PE(16:0/14:0(3-OH))-PAMDB003893	-20.7428	1.26427	0.239483	-20.5803	-20.854	0.779308	0.213461	0.136511	-0.136511	-19.8218	1.13783	-19.8531	PE(16:0/14:0(3-OH))-PAMDB003893	PE(16:0/14:0(3-OH))-PAMDB003893 [ C35H70NO9P, tgt= ]			(680.4674, 22317.416)(681.47015, 7514.394)(699.85596, 3550.1768)(701.18427, 3712.8333)(702.1895, 13139.165)(702.9268, 8107.504)(703.53394, 22227.584)(685.52405, 1133.762)(708.4996, 114500.805)
PE(17:0cycw7c/16:1(9Z))-PAMDB006684	-1.42164	2.32591	-0.0814495	-1.57157	1.41635	-20.4727	0.885342	0.370131	1.03998	-0.00787735	0.00787735	-0.59066	PE(17:0cycw7c/16:1(9Z))-PAMDB006684	PE(17:0cycw7c/16:1(9Z))-PAMDB006684 [ C38 H72 N O8 P, tgt=53.75, overall=53.75 ]			(704.86053, 14154.704)(702.5249, 11224.06)(683.5067, 9205.15)(706.5262, 33597.215)(707.5284, 10567.863)(719.7473, 3726.9324)(725.5423, 2416.14)(701.68964, 18225.414)(702.5253, 7225.426)(709.8594, 25353.518)(710.4991, 11064.485)(710.50366, 2855.984)
9E-Octadecenoic acid_BMDB63575	1.12068	1.10453	-0.0868387	0.10583	0.453221	0.441457	0.000628471	-28.7171	-0.000628471	-27.8726	-28.0209	-27.9039	9E-Octadecenoic acid_BMDB63575	9E-Octadecenoic acid_BMDB63575 [ C18 H34 O2, tgt=92.28, overall=92.28 ]			(265.24823, 618703.56)(266.25113, 103802.586)(267.25403, 5969.9224)(268.2583, 30389.469)(269.26117, 4040.67)(282.27487, 1.1771028E7)(283.27762, 2574014.2)(284.28137, 257109.73)(285.28442, 12465.175)
L-Norleucine_BMDB01645	0.0830193	0.0451984	0.0893288	-0.0451984	-0.150492	-0.358952	-0.784189	0.193613	0.766443	1.71027	-21.3613	-0.112181	L-Norleucine_BMDB01645	L-Norleucine_BMDB01645 [ C6 H13 N O2, tgt=60.31, overall=60.31 ]			(114.08916, 181071.48)(115.09219, 6873.5703)(141.08818, 4431.4976)
PG(16:0/12:0(3-OH))-PAMDB004084	-0.393725	7.65827	-0.813796	7.30236	7.11152	7.33118	0.132567	-1.34592	-0.132567	1.2449	-17.5983	-17.4813	PG(16:0/12:0(3-OH))-PAMDB004084	PG(16:0/12:0(3-OH))-PAMDB004084 [ C34 H67 O11 P, tgt=35.81, overall=35.81 ]			(664.44507, 798874.7)(665.4479, 171228.62)(666.4496, 16415.838)(688.0221, 11848.971)(689.4213, 4850.6133)
(+)-12-Methyltetradecanoic acid_BMDB62089	-22.0047	5.94874	-22.3334	-21.8422	-22.1158	-21.8278	5.04495	-5.04304	5.04304	6.15573	5.91153	6.16814	(+)-12-Methyltetradecanoic acid_BMDB62089	(+)-12-Methyltetradecanoic acid_BMDB62089 [ C15H30O2, tgt= ]			(267.2156, 115.61)(228.22845, 7897682.5)(229.2312, 1499636.6)(230.2349, 214235.23)(247.2355, 447.28003)(247.2011, 6296.74)(242.24432, 3671929.0)(243.24756, 568778.75)(244.24977, 32178.22)
PS(14:0/14:0)-PAMDB000841	0.903001	0.347692	-0.571225	-0.0174932	-0.193004	0.0174932	-0.343833	-0.43706	-0.666453	0.236081	0.511716	0.813474	PS(14:0/14:0)-PAMDB000841	PS(14:0/14:0)-PAMDB000841 [ C34 H66 N O10 P, tgt=90.31, overall=90.31 ]			(680.4656, 26378.855)(681.4682, 7607.76)(661.4243, 1119.4401)(662.4267, 656.58)(663.4431, 1461680.5)(664.4467, 650247.9)(665.4494, 132941.98)(666.4509, 12079.339)(699.5014, 2350.34)(680.4675, 20213.959)(681.4701, 6779.0703)(685.4231, 52858.996)(686.42584, 18492.771)(687.4276, 2256.47)
PE(10:0/14:0)-PAMDB001984	10.2594	9.92588	-11.0243	9.92762	9.84785	-10.5187	9.77457	-10.619	9.99211	-9.77457	-9.92283	-9.80586	PE(10:0/14:0)-PAMDB001984	PE(10:0/14:0)-PAMDB001984 [ C29 H58 N O8 P, tgt=59.95, overall=59.95 ]			(601.4276, 29855.314)(602.4307, 4948.692)(579.4148, 32056.295)(580.4172, 4549.408)(590.3895, 1284.9299)
PG(18:1(11Z)/14:0)-PAMDB001501	2.12615	0.0270386	-0.657528	0.796513	-0.927853	0.0827198	-0.334435	-0.799709	-0.0270386	0.0872555	0.787495	-0.149345	PG(18:1(11Z)/14:0)-PAMDB001501	PG(18:1(11Z)/14:0)-PAMDB001501 [ C38 H73 O10 P, tgt=64.39, overall=64.39 ]			(721.4924, 11758.774)(722.498, 4717.005)(723.5023, 905.73)(709.011, 80592.445)(709.5015, 62829.723)(742.20575, 43645.3)(743.5274, 982.51)(720.518, 9837.235)(721.5167, 1994.0442)(725.46686, 793.2025)
alpha-Lactose-PAMDB000076	-0.353734	0.28869	0.0426664	-1.05069	-1.41269	-0.0235109	-0.43426	0.0235109	0.180655	-0.406219	0.734988	0.262403	alpha-Lactose-PAMDB000076	alpha-Lactose-PAMDB000076 [ C12 H22 O11, tgt=63.76, overall=63.76 ]			(343.11697, 49482.45)(344.11975, 3536.9517)(325.1066, 31819.656)(326.10956, 1753.6617)(360.1428, 25569.467)(361.14584, 1400.0134)(365.09924, 786469.94)(366.10226, 86900.73)(367.10306, 12424.948)
Hydroxyproline_BMDB00725	8.89374	8.74601	8.0991	8.85716	8.79638	8.78294	-9.00925	-8.94356	-8.93028	-8.0991	-8.24736	-8.13039	Hydroxyproline_BMDB00725	Hydroxyproline_BMDB00725 [ C5 H9 N O3, tgt=47.17, overall=47.17 ]			(115.051796, 5270.5103)(149.09294, 1591.7134)(131.08243, 8206.356)
L-Dihydroorotic acid_BMDB03349	-0.0606337	0.134929	-0.375785	0.0963335	-0.459064	0.0606337	0.159867	-0.68679	0.0796041	0.843757	-17.553	-17.4361	L-Dihydroorotic acid_BMDB03349	L-Dihydroorotic acid_BMDB03349 [ C5 H6 N2 O4, tgt=45.46, overall=45.46 ]			(177.06653, 8029.3125)(181.02249, 11176.341)
8E-heptadecenoic acid_BMDB62592	0.38413	0.172427	-0.0856943	0.535216	0.34184	0.567676	-0.931193	0.0688868	-1.04668	-0.0688868	-21.4678	-21.3508	8E-heptadecenoic acid_BMDB62592	8E-heptadecenoic acid_BMDB62592 [ C17 H32 O2, tgt=82.32, overall=82.32 ]			(251.23254, 156802.31)(252.2349, 21870.592)(294.23776, 241534.33)(295.24042, 37499.992)(296.25262, 6449375.0)(276.2265, 3235.4167)(278.24194, 30331.344)
PE(19:iso/17:0cycw7c)-PAMDB003921	1.04047	-0.0517855	-19.3575	2.91319	-19.1399	2.44374	0.0517855	0.594821	1.68628	-18.1078	-18.256	-0.353911	PE(19:iso/17:0cycw7c)-PAMDB003921	PE(19:iso/17:0cycw7c)-PAMDB003921 [ C41 H80 N O8 P, tgt=67.53, overall=67.53 ]			(729.56146, 2830.2083)(730.5794, 6882.9604)(731.7709, 9812.174)(732.77185, 3027.182)(733.775, 5994.422)(734.55927, 10877.85)(766.603, 17587.688)(764.59283, 13102.83)(765.5956, 2043.81)(746.55444, 8258.693)(747.5569, 1428.0549)
Sucrose-PAMDB000109	-0.353734	0.28869	0.0426664	-1.05069	-1.41269	-0.0235109	-0.43426	0.0235109	0.180655	-0.406219	0.734988	0.262403	Sucrose-PAMDB000109	Sucrose-PAMDB000109 [ C12 H22 O11, tgt=63.76, overall=63.76 ]			(343.11697, 49482.45)(344.11975, 3536.9517)(325.1066, 31819.656)(326.10956, 1753.6617)(360.1428, 25569.467)(361.14584, 1400.0134)(365.09924, 786469.94)(366.10226, 86900.73)(367.10306, 12424.948)
PG(18:1(9Z)/15:0)-PAMDB006395	0.420682	1.432	1.03471	-20.4867	0.58962	-0.331593	0.905972	0.0415544	-0.0415544	-19.7282	-19.8764	-19.7595	PG(18:1(9Z)/15:0)-PAMDB006395	PG(18:1(9Z)/15:0)-PAMDB006395 [ C39 H75 O10 P, tgt=24.22, overall=24.22 ]			(716.508, 18227.871)(717.5109, 6235.534)(718.5132, 90.75)(722.54034, 749.7967)(758.55676, 14825.3955)(735.5453, 553.815)(737.5546, 1555.65)(740.50726, 5997.25)(741.51, 1267.1799)
2-Acyl-sn-glycero-3-phosphoethanolamine(N-C18:0)-PAMDB001553	0.828074	-0.108183	0.130537	0.574472	-17.9618	0.402714	-17.8398	0.108183	-0.670366	0.658564	-17.0779	-16.9609	2-Acyl-sn-glycero-3-phosphoethanolamine(N-C18:0)-PAMDB001553	2-Acyl-sn-glycero-3-phosphoethanolamine(N-C18:0)-PAMDB001553 [ C23 H48 N O7 P, tgt=60.91, overall=60.91 ]			(485.3284, 27507.803)(486.3167, 13902.7)(463.2935, 11406.867)(464.29614, 769.545)(485.3367, 884.81)(502.36435, 99332.586)(503.3669, 21387.17)(504.3689, 1246.1881)(485.6803, 2042.3232)(486.3676, 2190.28)(507.31943, 6753.581)
PG(12:0/14:0(3-OH))-PAMDB004055	0.575754	0.207411	0.0662022	0.228659	0.0963306	-0.0876827	-1.07702	-0.0889358	-1.05029	-0.0662022	-0.622459	0.216705	PG(12:0/14:0(3-OH))-PAMDB004055	PG(12:0/14:0(3-OH))-PAMDB004055 [ C32 H63 O11 P, tgt=66.97, overall=66.97 ]			(638.4056, 5712.765)(639.408, 1553.6918)(678.3972, 26740.463)(679.39984, 6747.4546)(680.4018, 267.33)
PS(16:0/16:0)-PAMDB000157	-0.133348	18.2593	-0.462088	19.3736	-0.24448	0.0434971	-0.122469	-0.0567818	-0.0434971	0.787674	0.639418	0.756386	PS(16:0/16:0)-PAMDB000157	PS(16:0/16:0)-PAMDB000157 [ C38H74NO10P, tgt= ]			(718.523, 12173.52)(719.52637, 3515.08)(755.5624, 206.28)
HemeD-PAMDB001368	0.0296354	0.323661	0.293008	-0.0296354	0.0461092	-0.412068	0.430972	-18.8483	0.129958	-18.0039	-18.1521	-18.0352	HemeD-PAMDB001368	HemeD-PAMDB001368 [ C34 H34 N4 O10, tgt=13.37, overall=13.37 ]			(645.2211, 544.0417)(676.27185, 18346.414)(677.2731, 1344.7612)
PG(14:0(3-OH)/12:0(3-OH))-PAMDB004060	3.90045	2.80742	-0.53191	-1.88881	0.246437	-0.74658	-18.4459	-18.3802	0.125149	1.4986	-0.125149	1.15515	PG(14:0(3-OH)/12:0(3-OH))-PAMDB004060	PG(14:0(3-OH)/12:0(3-OH))-PAMDB004060 [ C32 H63 O12 P, tgt=14.75, overall=14.75 ]			(688.4193, 18893.111)(689.422, 5020.57)(675.4081, 2880.907)
Glufosinate-PAMDB004380	0.432004	-0.201957	-0.360412	0.0989752	-0.119132	-25.1323	-25.2983	0.459006	-0.0989752	1.39065	0.468554	1.38198	Glufosinate-PAMDB004380	Glufosinate-PAMDB004380 [ C4 H10 N O4 P, tgt=71.89, overall=71.89 ]			(149.02103, 1417940.2)(150.02388, 97452.94)(151.0253, 5378.9824)
PS(14:0/12:0(3-OH))-PAMDB003976	10.2384	9.77438	9.71506	-8.66798	8.05598	-8.65365	8.50859	-8.75393	7.90947	-7.90947	-8.05773	-7.94076	PS(14:0/12:0(3-OH))-PAMDB003976	PS(14:0/12:0(3-OH))-PAMDB003976 [ C32 H60 N O11 P, tgt=61.77, overall=61.77 ]			(647.37866, 10765.544)(648.38165, 1574.8334)
2-Acyl-sn-glycero-3-phosphoglycerol(N-C16:0)-PAMDB001558	0.380843	-0.735175	-0.370879	0.163861	-0.20255	0.366384	-0.27341	-0.163861	-0.672416	0.40968	0.289323	0.715499	2-Acyl-sn-glycero-3-phosphoglycerol(N-C16:0)-PAMDB001558	2-Acyl-sn-glycero-3-phosphoglycerol(N-C16:0)-PAMDB001558 [ C22 H44 O9 P, tgt=81.95, overall=81.95 ]			(471.29578, 2600.49)(483.2976, 54769.105)(484.30008, 9801.157)(485.3033, 337.35)
5-Dodecenoic acid_BMDB00529	0.343296	0.000841141	-0.352293	0.253181	-0.000841141	0.231913	-19.8556	0.0200691	-0.825775	-18.9455	0.0616283	-18.9768	5-Dodecenoic acid_BMDB00529	5-Dodecenoic acid_BMDB00529 [ C12 H22 O2, tgt=72.14, overall=72.14 ]			(181.15485, 2011.0555)(184.1659, 16060.375)(219.2071, 256071.89)(220.21002, 31575.521)(221.2124, 247.04001)(198.18134, 20588.549)(199.18414, 281.03668)
3-demethylubiquinol-8-PAMDB006376	8.64486	11.7332	12.0487	-9.40337	10.0034	-9.38903	9.22029	10.6776	-9.47603	-8.64486	-8.79311	-8.67614	3-demethylubiquinol-8-PAMDB006376	3-demethylubiquinol-8-PAMDB006376 [ C48 H74 O4, tgt=17.19, overall=17.19 ]			(714.55865, 24915.094)(715.56494, 12679.316)(702.5483, 8719.04)(715.5687, 21103.21)(716.5716, 7066.43)(700.56146, 18010.814)(701.5633, 9172.562)(734.61426, 13493.732)(735.618, 6817.7466)(736.6257, 629.37)(740.0736, 8782.337)(740.5736, 2798.5698)(719.52844, 3606.8677)
2-Methylbutyroylcarnitine_BMDB00378	0.764664	2.65286	1.42651	-20.7546	-1.67068	0.671062	-20.9062	0.459465	-0.0718822	0.0718822	-20.1443	-20.0274	2-Methylbutyroylcarnitine_BMDB00378	2-Methylbutyroylcarnitine_BMDB00378 [ C12 H23 N O4, tgt=78.12, overall=78.12 ]			(246.1655, 168943.78)(247.16832, 14763.728)(248.1697, 1380.35)(229.15894, 40819.395)(229.15837, 4830.5)(250.13708, 88280.055)(251.13977, 6956.483)
Capric acid_BMDB00511	-2.56484	-2.93626	0.12569	-3.43412	0.117265	-0.117265	0.680629	0.330852	0.431458	-1.81408	0.308162	-19.1145	Capric acid_BMDB00511	Capric acid_BMDB00511 [ C10 H20 O2, tgt=95.22, overall=95.22 ]			(158.15137, 430443.25)(159.1541, 32347.305)(160.157, 351.25)(172.16621, 16095.586)(173.1698, 1930.48)(195.56448, 27647.531)(196.13751, 1877.13)(177.12369, 944.138)
Caprylicacid-PAMDB000140	1.52155	0.940571	1.03882	1.78153	1.36214	1.68457	-3.67124	-1.08589	-4.15069	-3.10638	-4.03898	-0.940571	Caprylicacid-PAMDB000140	Caprylicacid-PAMDB000140 [ C8 H16 O2, tgt=61.51, overall=61.51 ]			(149.12923, 1481.6171)(144.13579, 413575.7)(145.13875, 23593.65)(167.10349, 7597.0347)(151.00922, 4671.9395)
PE(17:0cycw7c/14:0(3-OH))-PAMDB003901	-22.339	0.649372	0.0782738	0.654217	-0.055069	-22.1621	-22.3281	-0.372396	-0.493036	0.314081	0.168108	0.055069	PE(17:0cycw7c/14:0(3-OH))-PAMDB003901	PE(17:0cycw7c/14:0(3-OH))-PAMDB003901 [ C36H70NO9P, tgt= ]			(694.48126, 269.27)(675.4837, 1745.582)(674.4916, 1835.49)(709.51447, 27347.695)(710.51685, 5663.1885)
PS(12:0(3-OH)/19:iso)-PAMDB003956	18.3603	17.7785	-0.498417	-0.00716972	-0.280809	0.00716782	-0.158798	-0.093111	-0.0798264	0.751345	18.2575	19.4585	PS(12:0(3-OH)/19:iso)-PAMDB003956	PS(12:0(3-OH)/19:iso)-PAMDB003956 [ C37 H70 N O11 P, tgt=12.90, overall=12.90 ]			(717.4426, 9992.516)(718.4457, 1802.875)(742.4394, 128221.2)(743.44214, 50606.258)(744.4437, 7776.2354)(745.4452, 431.9)
Choline-PAMDB000036	0.655541	0.068532	0.0561323	-0.727862	-1.71073	-1.87677	1.07559	1.08629	1.11972	-0.0561323	-0.510449	-20.6493	Choline-PAMDB000036	Choline-PAMDB000036 [ C5 H14 N O, tgt=75.34, overall=75.34 ]			(104.10528, 232679.02)(105.108055, 8123.6313)
510-Methenyltetrahydrofolate-PAMDB001585	-0.25408	1.36966	-17.3918	0.389782	0.107721	-0.568006	-0.107721	-16.9865	-16.9732	1.51941	1.72152	2.57329	510-Methenyltetrahydrofolate-PAMDB001585	510-Methenyltetrahydrofolate-PAMDB001585 [ C20 H22 N7 O6, tgt=22.92, overall=22.92 ]			(456.17236, 8638.29)(457.1751, 453.4)(440.1639, 569.805)(458.1771, 1024.71)(474.18933, 6594.0625)(456.17374, 13473.942)(457.1768, 1325.4867)(479.1571, 1692.8917)(465.1603, 255.28)
(S)-4-Amino-5-oxopentanoate-PAMDB000866	8.89374	8.74601	8.0991	8.85716	8.79638	8.78294	-9.00925	-8.94356	-8.93028	-8.0991	-8.24736	-8.13039	(S)-4-Amino-5-oxopentanoate-PAMDB000866	(S)-4-Amino-5-oxopentanoate-PAMDB000866 [ C5 H9 N O3, tgt=47.17, overall=47.17 ]			(115.051796, 5270.5103)(149.09294, 1591.7134)(131.08243, 8206.356)
cis-15-Octadecenoic acid_BMDB62099	0.847039	0.830888	-0.360482	-0.167813	0.179578	0.167813	-0.273015	-28.9907	-0.274272	0.668677	-28.2945	0.786401	cis-15-Octadecenoic acid_BMDB62099	cis-15-Octadecenoic acid_BMDB62099 [ C18 H34 O2, tgt=92.28, overall=92.28 ]			(265.24838, 603388.6)(266.25125, 100436.58)(267.2542, 5692.529)(268.2583, 30389.469)(269.26117, 4040.67)(282.275, 1.1567803E7)(283.27777, 2512802.2)(284.28143, 247021.67)(285.28424, 11591.22)
PE(15:0cyclo/10:0(3-OH))-PAMDB003887	0.344003	1.15795	0.109607	0.096324	-0.325107	0.0747309	-0.31076	-0.394179	-1.08805	-1.23698	-0.0747309	0.138577	PE(15:0cyclo/10:0(3-OH))-PAMDB003887	PE(15:0cyclo/10:0(3-OH))-PAMDB003887 [ C30 H58 N O9 P, tgt=65.35, overall=65.35 ]			(607.3801, 89085.78)(608.3829, 27624.225)(609.3848, 2969.081)(589.3831, 4024.415)(590.3873, 732.26)(593.405, 1218.565)(594.4072, 235.74)(629.4485, 2914.03)(630.4496, 108.43)
beta-D-Fructose2-phosphate-PAMDB002053	-0.831249	18.568	17.8579	-0.668741	-0.942381	-0.654404	-0.82037	17.3699	17.7674	0.0897732	-0.0584831	0.058485	beta-D-Fructose2-phosphate-PAMDB002053	beta-D-Fructose2-phosphate-PAMDB002053 [ C6 H13 O9 P, tgt=48.78, overall=48.78 ]			(261.03217, 2155.51)(260.04822, 28408.873)(261.54883, 695.8)(262.0468, 497.13)(283.01324, 1107.245)
2-Naphthaldehyde-PAMDB000896	-0.494613	0.966094	1.32591	-17.026	-17.2996	0.494613	-0.680356	1.08634	1.42328	-16.2675	2.05796	-16.2987	2-Naphthaldehyde-PAMDB000896	2-Naphthaldehyde-PAMDB000896 [ C11 H8 O, tgt=12.17, overall=12.17 ]			(140.05373, 3481.4082)(141.0541, 1181.8833)(157.06786, 15985.467)(158.06935, 2120.5852)(159.0657, 626.17)(139.05762, 5389.9287)
Myristicacid-PAMDB001822	0.0584621	-0.0584621	-0.418007	-2.25423	6.87227	0.167105	6.21132	-0.304983	6.23792	7.34968	-1.29484	-0.52639	Myristicacid-PAMDB001822	Myristicacid-PAMDB001822 [ C14 H28 O2, tgt=70.74, overall=70.74 ]			(233.2212, 1813.05)(214.2128, 470821.16)(215.2155, 43265.24)(228.22923, 1.0210576E7)(229.23203, 1797620.2)(230.23459, 122925.42)(251.44818, 96807.66)(252.19911, 11974.556)(233.63324, 7891.479)(234.18361, 2072.11)
L-Acetylcarnitine_BMDB00201	-0.94493	2.82436	1.92611	-1.46595	-2.32195	-0.0907583	-0.264564	0.928287	1.60715	-20.2406	2.9155	0.0907583	L-Acetylcarnitine_BMDB00201	L-Acetylcarnitine_BMDB00201 [ C9 H17 N O4, tgt=70.89, overall=70.89 ]			(204.11938, 205223.8)(205.12236, 14461.281)(206.12492, 1986.1733)(186.1082, 452.27)(208.15013, 13015.809)
3-Amino-2-oxopropylphosphate-PAMDB004250	15.6991	19.7382	18.7926	-0.74287	-1.01651	16.6074	-0.894499	-0.828812	17.3364	0.0156441	-0.132612	-0.0156441	3-Amino-2-oxopropylphosphate-PAMDB004250	3-Amino-2-oxopropylphosphate-PAMDB004250 [ C3 H8 N O5 P, tgt=47.42, overall=47.42 ]			(173.0217, 3922.7449)(157.02121, 94268.98)(189.048, 943.4)(169.0324, 42038.75)(170.0348, 1217.08)(177.0033, 8589.62)
PE(14:0(3-OH)/16:0)-PAMDB003873	-20.7428	1.26427	0.239483	-20.5803	-20.854	0.779308	0.213461	0.136511	-0.136511	-19.8218	1.13783	-19.8531	PE(14:0(3-OH)/16:0)-PAMDB003873	PE(14:0(3-OH)/16:0)-PAMDB003873 [ C35H70NO9P, tgt= ]			(680.4674, 22317.416)(681.47015, 7514.394)(699.85596, 3550.1768)(701.18427, 3712.8333)(702.1895, 13139.165)(702.9268, 8107.504)(703.53394, 22227.584)(685.52405, 1133.762)(708.4996, 114500.805)
N-Heptanoylglycine_BMDB62218	13.3682	12.6046	12.8178	-12.2949	-12.5685	13.1655	-12.4465	-12.3808	-12.3675	-11.5364	11.5364	13.1777	N-Heptanoylglycine_BMDB62218	N-Heptanoylglycine_BMDB62218 [ C9 H17 N O3, tgt=78.09, overall=78.09 ]			(210.1069, 907843.9)(211.10966, 69060.83)(212.11128, 3597.084)(170.11496, 1320351.1)(171.11792, 117024.875)(172.12079, 6149.5557)(187.95697, 124809.414)(189.12772, 8891.894)(187.1416, 351313.12)(188.1441, 23406.51)
PG(17:0cycw7c/16:0)-PAMDB006505	0.420682	1.432	1.03471	-20.4867	0.58962	-0.331593	0.905972	0.0415544	-0.0415544	-19.7282	-19.8764	-19.7595	PG(17:0cycw7c/16:0)-PAMDB006505	PG(17:0cycw7c/16:0)-PAMDB006505 [ C39 H75 O10 P, tgt=24.22, overall=24.22 ]			(716.508, 18227.871)(717.5109, 6235.534)(718.5132, 90.75)(722.54034, 749.7967)(758.55676, 14825.3955)(735.5453, 553.815)(737.5546, 1555.65)(740.50726, 5997.25)(741.51, 1267.1799)
DG(14:0/15:0/0:0)-PAMDB003652	-9.57441	8.65338	12.2549	-9.4119	-9.68554	-9.39756	12.3093	12.6773	12.7413	-8.65338	-8.80164	9.55424	DG(14:0/15:0/0:0)-PAMDB003652	DG(14:0/15:0/0:0)-PAMDB003652 [ C32H62O5, tgt= ]			(508.44626, 2627.6516)(509.4481, 827.45496)(509.44672, 20117.375)(510.44934, 4130.5176)(552.4706, 9527.51)(553.474, 808.05)(535.46075, 6187.7476)
DG(12:0/14:0/0:0)-PAMDB003642	1.94656	-0.0570612	0.00242138	1.98586	1.10804	-0.00242138	-24.2265	-0.0933123	-24.1475	-0.626142	0.00878239	0.0269175	DG(12:0/14:0/0:0)-PAMDB003642	DG(12:0/14:0/0:0)-PAMDB003642 [ C29 H56 O5, tgt=50.11, overall=50.11 ]			(484.3995, 4134.9663)(466.39096, 398421.44)(467.39505, 158832.7)(468.39706, 16669.531)(469.39618, 2325.3398)(467.401, 216944.5)(468.4048, 61902.332)(469.4079, 6116.1196)(507.3872, 110.37)(491.39923, 10773.52)(492.65567, 26691.045)(493.66638, 50125.844)(494.41873, 14238.109)
5-Amino-6-ribitylaminouracil-PAMDB000635	-0.250268	1.57523	2.72072	-0.539845	-22.4249	0.456122	0.250268	0.469665	0.603276	-21.3927	-21.541	-21.424	5-Amino-6-ribitylaminouracil-PAMDB000635	5-Amino-6-ribitylaminouracil-PAMDB000635 [ C9 H16 N4 O6, tgt=43.40, overall=43.40 ]			(259.10855, 38583.664)(260.1096, 3821.525)(281.84033, 1507.54)
Adrenic acid_BMDB02226	21.6655	21.1436	-1.23412	20.9997	21.1563	21.2997	-0.894499	-0.828812	-0.815527	0.0156441	-0.132612	-0.0156441	Adrenic acid_BMDB02226	Adrenic acid_BMDB02226 [ C22 H36 O2, tgt=53.42, overall=53.42 ]			(332.2716, 2464.38)(314.2625, 61427.992)(315.2652, 8047.4814)(337.24628, 28028.318)
Aminomalonic acid_BMDB01147	0.0732842	-0.227402	-0.108721	-0.0732842	-0.593046	-0.55513	0.481995	-0.13508	0.424402	1.72083	0.274366	0.484135	Aminomalonic acid_BMDB01147	Aminomalonic acid_BMDB01147 [ C3 H5 N O4, tgt=66.95, overall=66.95 ]			(137.05692, 4700.095)(119.046936, 35476.645)(120.05005, 1046.3717)
DG(12:0/18:0/0:0)-PAMDB003646	0.367508	0.202709	-0.308622	0.378128	-0.0527611	0.0527611	-1.43602	0.136209	-1.1331	-0.578482	-0.391176	0.182268	DG(12:0/18:0/0:0)-PAMDB003646	DG(12:0/18:0/0:0)-PAMDB003646 [ C33 H64 O5, tgt=75.68, overall=75.68 ]			(547.5098, 50083.402)(523.4621, 12664.34)(559.50934, 99881.125)(560.51196, 30427.25)(561.5141, 4150.3647)(549.4774, 7111.22)
o-Tyrosine_BMDB06050	-0.0755777	-0.0673895	0.121236	-0.999749	-0.843442	0.301543	-0.875974	0.0673895	0.133607	0.0911055	-1.0255	1.07731	o-Tyrosine_BMDB06050	o-Tyrosine_BMDB06050 [ C9 H11 N O3, tgt=62.55, overall=62.55 ]			(182.07668, 3329.9568)(166.52539, 176767.72)(167.67276, 12978.412)(167.07181, 864.63995)(184.09065, 719.24567)(166.0803, 749.67)(204.11948, 101728.78)(186.1082, 168.76)(188.0624, 246.91)
PG(10:0(3-OH)/16:0)-PAMDB004029	0.575754	0.207411	0.0662022	0.228659	0.0963306	-0.0876827	-1.07702	-0.0889358	-1.05029	-0.0662022	-0.622459	0.216705	PG(10:0(3-OH)/16:0)-PAMDB004029	PG(10:0(3-OH)/16:0)-PAMDB004029 [ C32 H63 O11 P, tgt=66.97, overall=66.97 ]			(638.4056, 5712.765)(639.408, 1553.6918)(678.3972, 26740.463)(679.39984, 6747.4546)(680.4018, 267.33)
beta-D-Glucose6-phosphate-PAMDB000506	-0.831249	18.568	17.8579	-0.668741	-0.942381	-0.654404	-0.82037	17.3699	17.7674	0.0897732	-0.0584831	0.058485	beta-D-Glucose6-phosphate-PAMDB000506	beta-D-Glucose6-phosphate-PAMDB000506 [ C6 H13 O9 P, tgt=48.78, overall=48.78 ]			(261.03217, 2155.51)(260.04822, 28408.873)(261.54883, 695.8)(262.0468, 497.13)(283.01324, 1107.245)
PG(10:0(3-OH)/16:1(9Z))-PAMDB004030	21.6268	20.7692	18.2635	-0.74287	18.3686	-0.728533	17.0653	-0.828812	-0.815527	0.0156441	-0.132612	-0.0156441	PG(10:0(3-OH)/16:1(9Z))-PAMDB004030	PG(10:0(3-OH)/16:1(9Z))-PAMDB004030 [ C32 H61 O11 P, tgt=42.37, overall=42.37 ]			(652.3975, 7806.77)(653.4003, 1171.6)(653.4277, 16754.762)(654.4307, 4757.097)(655.4335, 338.53)
PG(14:0/17:0)-PAMDB001445	2.05312	0.613619	-23.748	0.40502	0.158459	-0.158459	-0.603779	-0.512297	-0.560699	-22.4983	1.8098	1.63563	PG(14:0/17:0)-PAMDB001445	PG(14:0/17:0)-PAMDB001445 [ C37 H73 O10 P, tgt=48.96, overall=48.96 ]			(694.481, 2599.76)(695.484, 804.79)(729.4028, 5643.1475)(728.5351, 1099.59)(729.5462, 5266.34)(709.01166, 86380.586)(710.0143, 33554.082)(710.5038, 9640.376)(731.4689, 7569.12)(732.4718, 1519.734)
CDP-DG(16:0/18:1(11Z))-PAMDB000710	-0.126179	16.4722	-0.454918	0.0363293	-0.23731	0.0506668	-0.115299	-0.049612	-0.0363274	17.6155	19.8952	17.6343	CDP-DG(16:0/18:1(11Z))-PAMDB000710	CDP-DG(16:0/18:1(11Z))-PAMDB000710 [ C46 H83 N3 O15 P2, tgt= ]			(979.5456, 1956.58)(997.559, 8719.345)(998.5616, 5412.7354)
DG(12:0(3-OH)/14:0(3-OH)/0:0)-PAMDB006871	2.60175	0.833286	-0.833286	-23.3311	-23.6048	-23.3168	3.05802	2.55912	2.54441	-22.5726	-22.7209	2.21437	DG(12:0(3-OH)/14:0(3-OH)/0:0)-PAMDB006871	DG(12:0(3-OH)/14:0(3-OH)/0:0)-PAMDB006871 [ C29 H56 O7, tgt=63.15, overall=63.15 ]			(516.4069, 237747.83)(517.40674, 56211.492)(518.40656, 6630.64)(502.3999, 939.7166)(534.43134, 26097.412)(535.43164, 4235.9272)(519.1448, 182050.98)(519.432, 67660.7)(518.42194, 12042.563)(519.4284, 1525.58)(539.3877, 84307.76)(540.3871, 10784.018)(522.38074, 128622.336)(523.3835, 29754.951)(523.377, 2810.8035)
Oroticacid-PAMDB000094	-19.3358	2.60128	1.76317	-0.281556	-0.841876	0.503552	-19.3249	-19.2593	0.508159	0.281556	2.98893	-18.4461	Oroticacid-PAMDB000094	Oroticacid-PAMDB000094 [ C5 H4 N2 O4, tgt=65.79, overall=65.79 ]			(157.02142, 109968.98)(158.0244, 2580.4749)(156.039, 46405.77)(157.0419, 1246.36)(158.03708, 1793.765)
Oleic acid_BMDB00207	0.673344	0.657192	-0.534178	-0.341509	0.00588226	-0.00588226	-0.446711	-29.1644	-0.447968	0.494982	0.14739	0.612705	Oleic acid_BMDB00207	Oleic acid_BMDB00207 [ C18 H34 O2, tgt=92.28, overall=92.28 ]			(265.2484, 593657.94)(266.2513, 98368.05)(267.25427, 5525.8926)(268.2583, 30389.469)(269.26117, 4040.67)(282.27502, 1.1418404E7)(283.27783, 2470817.2)(284.28143, 241057.31)(285.28415, 11129.535)
DL-2-Aminooctanoic acid_BMDB00991	0.238794	-0.0676708	-0.266663	0.369093	0.0676708	0.282591	-0.726524	0.0905476	-0.831446	0.159346	-19.2392	-19.1222	DL-2-Aminooctanoic acid_BMDB00991	DL-2-Aminooctanoic acid_BMDB00991 [ C8 H17 N O2, tgt=70.29, overall=70.29 ]			(185.12813, 570.62006)(142.11975, 14901.061)(161.12938, 24719.133)(162.1323, 829.02997)(177.1597, 420.152)(163.14478, 4623.587)(168.61761, 775.1175)(169.1188, 811.98)
Pyrrolinehydroxycarboxylicacid-PAMDB000359	-0.126179	17.4931	-0.454918	0.0363293	-0.23731	0.0506668	-0.115299	-0.049612	-0.0363274	0.794844	0.646587	0.763556	Pyrrolinehydroxycarboxylicacid-PAMDB000359	Pyrrolinehydroxycarboxylicacid-PAMDB000359 [ C5H7NO3, tgt= ]			(130.0467, 8260.61)(132.074, 330922.7)(133.0768, 9879.41)
PE(15:0cyclo/19:0cycv8c)-PAMDB006673	1.5334	-0.224635	-1.83074	-19.3594	4.37516	-19.3451	-19.511	-0.882234	0.224635	5.07224	1.82266	3.73239	PE(15:0cyclo/19:0cycv8c)-PAMDB006673	PE(15:0cyclo/19:0cycv8c)-PAMDB006673 [ C39 H74 N O8 P, tgt=64.14, overall=64.14 ]			(718.5207, 5702.0566)(719.02576, 3469.81)(720.0226, 3380.645)(721.5189, 941.68)(703.5142, 57.67)(717.8532, 7102.6035)(719.5156, 4751.25)(721.5176, 1366.35)(700.2628, 2930.8477)(700.8481, 5851.3535)(701.85504, 13932.993)(702.861, 7247.9766)(703.86884, 18809.244)(704.53625, 9225.59)(735.5534, 8023.929)(736.8048, 2372.0176)(743.42004, 26596.29)(743.5256, 2651.31)(744.5384, 4914.14)(721.4923, 9818.51…
PGP(19:iso/15:0)-PAMDB006655	0.160475	0.138462	0.198771	-16.5747	-16.8484	-16.5604	0.245966	-16.6607	-0.138462	1.61568	-15.9645	0.660089	PGP(19:iso/15:0)-PAMDB006655	PGP(19:iso/15:0)-PAMDB006655 [ C40 H80 O13 P2, tgt=15.77, overall=15.77 ]			(854.4847, 8513.453)(855.48724, 2391.1914)
1-Acyl-sn-glycero-3-phosphoglycerol(N-C16:1)-PAMDB001533	16.5076	17.4144	17.9223	-0.668741	-0.942381	-0.654404	18.4502	-0.754683	-0.741398	0.0897732	-0.0584831	0.058485	1-Acyl-sn-glycero-3-phosphoglycerol(N-C16:1)-PAMDB001533	1-Acyl-sn-glycero-3-phosphoglycerol(N-C16:1)-PAMDB001533 [ C22 H42 O9 P, tgt=15.15, overall=15.15 ]			(487.29077, 746.6)
trans-8-Elaidic acid_BMDB63574	1.12068	1.10453	-0.0868387	0.10583	0.453221	0.441457	0.000628471	-28.7171	-0.000628471	-27.8726	-28.0209	-27.9039	trans-8-Elaidic acid_BMDB63574	trans-8-Elaidic acid_BMDB63574 [ C18 H34 O2, tgt=92.28, overall=92.28 ]			(265.24823, 618703.56)(266.25113, 103802.586)(267.25403, 5969.9224)(268.2583, 30389.469)(269.26117, 4040.67)(282.27487, 1.1771028E7)(283.27762, 2574014.2)(284.28137, 257109.73)(285.28442, 12465.175)
b-D-Glucose-PAMDB000145	-0.00323677	2.45831	1.18019	0.200661	-19.6332	-0.376274	-1.30865	-0.313826	0.00323677	-0.229916	2.15466	0.133585	b-D-Glucose-PAMDB000145	b-D-Glucose-PAMDB000145 [ C6 H12 O6, tgt=53.01, overall=53.01 ]			(180.15381, 46631.38)(181.26663, 4698.748)(185.0746, 18681.15)(162.0514, 4337.51)(183.0983, 772.99)(208.06924, 4107.538)
PE(12:0(3-OH)/16:0)-PAMDB003855	0.654247	-0.444405	-0.13797	0.682629	-0.0636597	0.0636597	-0.461355	-0.403307	-0.682459	0.333439	0.138075	0.457472	PE(12:0(3-OH)/16:0)-PAMDB003855	PE(12:0(3-OH)/16:0)-PAMDB003855 [ C33 H66 N O9 P, tgt=65.01, overall=65.01 ]			(658.4636, 594.25)(634.4405, 34261.16)(635.4431, 8722.946)(636.4497, 394.28)(654.4809, 1065.245)(678.13055, 16606.67)(679.26843, 11362.755)(679.468, 9031.49)
PE(12:0(3-OH)/18:1(9Z))-PAMDB003858	0.669246	-0.562436	-0.0661993	0.767516	-0.0490198	0.0490198	-0.474324	-0.474256	-20.5669	0.342788	0.217937	0.46161	PE(12:0(3-OH)/18:1(9Z))-PAMDB003858	PE(12:0(3-OH)/18:1(9Z))-PAMDB003858 [ C35 H68 N O9 P, tgt=69.51, overall=69.51 ]			(678.46674, 25124.46)(679.469, 6413.2886)
L-Leucine_BMDB00687	0.0830193	0.0451984	0.0893288	-0.0451984	-0.150492	-0.358952	-0.784189	0.193613	0.766443	1.71027	-21.3613	-0.112181	L-Leucine_BMDB00687	L-Leucine_BMDB00687 [ C6 H13 N O2, tgt=60.31, overall=60.31 ]			(114.08916, 181071.48)(115.09219, 6873.5703)(141.08818, 4431.4976)
L-Proline_BMDB00162	-19.2191	2.53426	1.93115	0.263756	-0.123142	0.108871	-1.67202	-0.108871	1.33601	-1.14823	0.864141	-18.3294	L-Proline_BMDB00162	L-Proline_BMDB00162 [ C5H9NO2, tgt= ]			(116.73428, 3890.5732)(133.09843, 9286.61)(138.05222, 55027.05)(139.0525, 1547.0566)(123.05294, 33471.312)
PS(12:0/17:0cycw7c)-PAMDB006709	0.0369167	0.0735817	-0.399384	-0.0369167	-0.0516911	-0.155998	0.570831	0.291294	0.787611	1.43638	-19.8509	-19.734	PS(12:0/17:0cycw7c)-PAMDB006709	PS(12:0/17:0cycw7c)-PAMDB006709 [ C35 H64 N O10 P, tgt=47.95, overall=47.95 ]			(713.4098, 119531.06)(714.4123, 36637.54)(715.4138, 4955.3276)
PS(16:1(9Z)/10:0(3-OH))-PAMDB003991	2.09644	1.62426	1.59043	0.0901251	0.0250921	-0.0250921	0.434567	-16.662	-0.0783091	-15.8175	-15.9658	-15.8488	PS(16:1(9Z)/10:0(3-OH))-PAMDB003991	PS(16:1(9Z)/10:0(3-OH))-PAMDB003991 [ C32 H58 N O11 P, tgt=19.02, overall=19.02 ]			(647.3784, 9296.894)(648.38165, 1503.8384)(651.3662, 191.76999)(647.37775, 6134.24)
1-Hydroxymethylnaphthalene-PAMDB000870	-0.261461	-0.15551	0.391174	0.0165138	-19.4108	-0.0165138	-0.292952	0.54143	0.657551	0.975418	-0.586853	0.981985	1-Hydroxymethylnaphthalene-PAMDB000870	1-Hydroxymethylnaphthalene-PAMDB000870 [ C11 H10 O, tgt=69.22, overall=69.22 ]			(140.06526, 3671.002)(146.08928, 461.3225)(162.10976, 131497.55)(163.11275, 5467.2515)(184.61594, 7022.7954)(186.07263, 22845.445)(167.07019, 11157.391)
Glucose1-phosphate-PAMDB000423	-0.831249	18.568	17.8579	-0.668741	-0.942381	-0.654404	-0.82037	17.3699	17.7674	0.0897732	-0.0584831	0.058485	Glucose1-phosphate-PAMDB000423	Glucose1-phosphate-PAMDB000423 [ C6 H13 O9 P, tgt=48.78, overall=48.78 ]			(261.03217, 2155.51)(260.04822, 28408.873)(261.54883, 695.8)(262.0468, 497.13)(283.01324, 1107.245)
Ubiquinone-8-PAMDB001700	16.8127	20.5631	-0.803545	-0.312298	21.0813	-0.29796	-0.463926	-0.398239	-0.384954	0.446217	0.29796	20.2126	Ubiquinone-8-PAMDB001700	Ubiquinone-8-PAMDB001700 [ C49 H74 O4, tgt=33.03, overall=33.03 ]			(728.0709, 4413.555)(728.5692, 1603.21)(729.5699, 2627.7)(731.5869, 1174.86)(730.06836, 9120.45)(732.5666, 3258.19)(713.8938, 20346.373)(714.89526, 8276.44)(715.5685, 27491.3)(744.60474, 14594.805)(745.60876, 3084.875)(728.5731, 7936.92)(733.5473, 10431.835)(733.5429, 3491.31)
1-Octadec-11-enoyl-sn-glycerol3-phosphate-PAMDB001539	-0.280039	-0.295626	-0.449993	0.315701	0.00183105	0.138218	-0.00183105	-0.127285	-0.169428	0.831459	5.30682	0.696627	1-Octadec-11-enoyl-sn-glycerol3-phosphate-PAMDB001539	1-Octadec-11-enoyl-sn-glycerol3-phosphate-PAMDB001539 [ C21 H39 O7 P, tgt=60.92, overall=60.92 ]			(434.23535, 22883.262)(416.2217, 680853.94)(417.2246, 124385.98)(418.226, 12989.9)(454.28366, 10171.937)(455.28635, 1207.0674)
Cellobiose-PAMDB000018	-0.353734	0.28869	0.0426664	-1.05069	-1.41269	-0.0235109	-0.43426	0.0235109	0.180655	-0.406219	0.734988	0.262403	Cellobiose-PAMDB000018	Cellobiose-PAMDB000018 [ C12 H22 O11, tgt=63.76, overall=63.76 ]			(343.11697, 49482.45)(344.11975, 3536.9517)(325.1066, 31819.656)(326.10956, 1753.6617)(360.1428, 25569.467)(361.14584, 1400.0134)(365.09924, 786469.94)(366.10226, 86900.73)(367.10306, 12424.948)
DG(14:0/16:1(9Z)/0:0)-PAMDB003654	2.44244	3.94519	-0.00271988	0.396084	2.80842	-22.6297	0.329378	-0.0246811	0.00271988	-21.8856	-22.0338	-21.9169	DG(14:0/16:1(9Z)/0:0)-PAMDB003654	DG(14:0/16:1(9Z)/0:0)-PAMDB003654 [ C33 H62 O5, tgt=51.88, overall=51.88 ]			(521.44574, 32789.2)(522.5953, 11966.198)(523.6059, 281388.94)(524.46576, 94743.79)(525.4678, 10648.46)(560.99774, 34082.01)(561.4998, 54565.965)(538.4795, 16152.37)(561.4629, 445.1)(543.5609, 52618.867)(544.64355, 15427.901)(545.6474, 1120.224)(547.459, 5154.6)
DG(14:0(3-OH)/12:0(3-OH)/0:0)-PAMDB006884	2.60175	0.833286	-0.833286	-23.3311	-23.6048	-23.3168	3.05802	2.55912	2.54441	-22.5726	-22.7209	2.21437	DG(14:0(3-OH)/12:0(3-OH)/0:0)-PAMDB006884	DG(14:0(3-OH)/12:0(3-OH)/0:0)-PAMDB006884 [ C29 H56 O7, tgt=63.15, overall=63.15 ]			(516.4069, 237747.83)(517.40674, 56211.492)(518.40656, 6630.64)(502.3999, 939.7166)(534.43134, 26097.412)(535.43164, 4235.9272)(519.1448, 182050.98)(519.432, 67660.7)(518.42194, 12042.563)(519.4284, 1525.58)(539.3877, 84307.76)(540.3871, 10784.018)(522.38074, 128622.336)(523.3835, 29754.951)(523.377, 2810.8035)
Ubiquinol-7-PAMDB001973	-10.7909	9.8699	10.6354	-10.6284	-10.9021	11.2753	11.5024	-10.7144	12.7085	-9.8699	-10.0182	12.7668	Ubiquinol-7-PAMDB001973	Ubiquinol-7-PAMDB001973 [ C44H68O4, tgt= ]			(660.5138, 115868.4)(661.5169, 19578.473)(645.4935, 506.125)(678.889, 7716.4414)(679.55676, 2797.115)(665.54724, 7393.678)(662.5289, 2286.8)(683.9112, 3134.382)(684.5121, 144.04)(671.50885, 826.25336)
PE(10:0/12:0)-PAMDB001983	0.520668	-0.777857	-0.14267	-0.236639	0.186426	-0.141159	-0.2799	0.141159	-2.16953	0.821997	0.425213	0.932728	PE(10:0/12:0)-PAMDB001983	PE(10:0/12:0)-PAMDB001983 [ C27 H54 N O8 P, tgt=52.61, overall=52.61 ]			(553.379, 407586.0)(554.3817, 114447.1)(555.3803, 24709.3)(556.3801, 1630.6)(535.8551, 1977.5801)(553.3809, 513603.84)(554.38385, 148789.36)(555.3824, 30941.912)(556.382, 2520.7334)(534.3682, 238.45)(572.6448, 15630.204)(573.97424, 10699.697)(574.65454, 3721.7375)(553.3804, 460178.06)(554.3832, 133186.0)(555.3818, 28102.105)(556.38153, 2788.0571)
PG(16:1(9Z)/12:0)-PAMDB006383	0.345349	0.00374508	-0.00374508	-0.130328	0.00467777	-0.320094	0.514712	-0.465074	0.266675	1.64176	-18.3096	-18.1926	PG(16:1(9Z)/12:0)-PAMDB006383	PG(16:1(9Z)/12:0)-PAMDB006383 [ C34 H65 O10 P, tgt=54.75, overall=54.75 ]			(648.4264, 22355.195)(649.4325, 8009.8037)(650.4441, 2019.96)(688.41785, 14763.521)(689.4205, 3779.4512)
PE(18:0/18:1(9Z))-PAMDB006238	1.04047	-0.0517855	-19.3575	2.91319	-19.1399	2.44374	0.0517855	0.594821	1.68628	-18.1078	-18.256	-0.353911	PE(18:0/18:1(9Z))-PAMDB006238	PE(18:0/18:1(9Z))-PAMDB006238 [ C41 H80 N O8 P, tgt=67.53, overall=67.53 ]			(729.56146, 2830.2083)(730.5794, 6882.9604)(731.7709, 9812.174)(732.77185, 3027.182)(733.775, 5994.422)(734.55927, 10877.85)(766.603, 17587.688)(764.59283, 13102.83)(765.5956, 2043.81)(746.55444, 8258.693)(747.5569, 1428.0549)
N1-(5-Phospho-a-D-ribosyl)-56-dimethylbenzimidazole-PAMDB000527	-0.721676	0.829878	0.829683	-1.33493	-2.09906	0.177164	-0.638933	0.618702	0.743015	-0.919399	1.56588	-0.177164	N1-(5-Phospho-a-D-ribosyl)-56-dimethylbenzimidazole-PAMDB000527	N1-(5-Phospho-a-D-ribosyl)-56-dimethylbenzimidazole-PAMDB000527 [ C14 H19 N2 O7 P, tgt=35.19, overall=35.19 ]			(381.07297, 3064759.2)(382.0762, 395877.25)(383.07272, 79167.78)(384.0748, 5306.6196)(367.0723, 355.52)
PS(15:0cyclo/12:0(3-OH))-PAMDB003984	-0.255841	-0.645038	-1.01435	-0.651956	-0.753209	-0.932342	0.48903	0.255841	0.569871	0.258786	1.37655	0.281997	PS(15:0cyclo/12:0(3-OH))-PAMDB003984	PS(15:0cyclo/12:0(3-OH))-PAMDB003984 [ C33 H60 N O11 P, tgt=68.29, overall=68.29 ]			(678.3961, 33588.227)(679.3988, 8820.237)(680.4018, 267.33)(682.3519, 83191.055)(683.3544, 22854.072)(684.3562, 1643.3717)
tetradecanoate(n-C14:0)-PAMDB001757	0.367305	0.0783129	0.125224	-0.0985708	0.056756	-0.056756	-0.778565	-19.2251	-0.973937	1.15129	-18.5289	1.78116	tetradecanoate(n-C14:0)-PAMDB001757	tetradecanoate(n-C14:0)-PAMDB001757 [ C14 H27 O2, tgt=61.77, overall=61.77 ]			(227.19617, 33010.727)(228.19913, 2708.7927)(210.1897, 6103.1304)(233.2226, 22500.99)(247.23825, 491121.7)(248.2411, 74267.53)(249.2438, 611.755)(228.2281, 9539.9)(251.19606, 55973.68)(252.19884, 6053.887)(233.18521, 2796.0374)
Dodecanoly-phosphate(n-C12:0)-PAMDB001618	-22.084	0.214105	0.08986	0.0362253	-0.0362253	-0.318849	-22.0731	0.0392981	0.601001	-21.163	-1.48066	1.079	Dodecanoly-phosphate(n-C12:0)-PAMDB001618	Dodecanoly-phosphate(n-C12:0)-PAMDB001618 [ C12H23O5P, tgt= ]			(281.03943, 1043.6526)(281.1666, 1375.86)(283.11288, 199576.88)(284.1156, 22634.467)(285.11725, 1043.724)
PG(12:0(3-OH)/14:0)-PAMDB004043	0.575754	0.207411	0.0662022	0.228659	0.0963306	-0.0876827	-1.07702	-0.0889358	-1.05029	-0.0662022	-0.622459	0.216705	PG(12:0(3-OH)/14:0)-PAMDB004043	PG(12:0(3-OH)/14:0)-PAMDB004043 [ C32 H63 O11 P, tgt=66.97, overall=66.97 ]			(638.4056, 5712.765)(639.408, 1553.6918)(678.3972, 26740.463)(679.39984, 6747.4546)(680.4018, 267.33)
PE(16:0/16:1(9Z))-PAMDB000757	-2.27837	-1.12275	1.72389	2.81196	1.07598	-21.0459	2.76707	2.70729	0.91389	-20.3017	-20.4499	-0.91389	PE(16:0/16:1(9Z))-PAMDB000757	PE(16:0/16:1(9Z))-PAMDB000757 [ C37 H72 N O8 P, tgt=52.49, overall=52.49 ]			(689.98596, 6708.81)(690.4833, 2250.19)(675.8234, 9314.354)(677.504, 3160.8252)(690.493, 145.3)(674.5031, 13143.329)(675.675, 3969.332)(676.67834, 9102.69)(677.3168, 2645.5479)(677.51886, 11326.82)(678.52106, 3098.8867)(709.53357, 18325.473)(712.03796, 12052.402)(713.05, 17268.67)(712.5439, 3806.4)(713.5567, 14878.42)(694.5498, 2149.36)(716.0067, 5874.689)(717.51166, 2246.5017)(718.5253, 2381.746…
12-Diacyl-sn-glycerol(ditetradecanoyln-C14:0)-PAMDB001518	-1.41117	-2.4348	0.0582428	-23.431	1.63198	-0.0582428	0.508856	0.12331	-0.129759	3.34768	0.642914	-1.08233	12-Diacyl-sn-glycerol(ditetradecanoyln-C14:0)-PAMDB001518	12-Diacyl-sn-glycerol(ditetradecanoyln-C14:0)-PAMDB001518 [ C31 H60 O5, tgt=45.39, overall=45.39 ]			(494.41882, 8531.014)(495.43134, 73688.05)(496.43423, 17552.883)(497.43658, 2293.38)(534.6793, 17371.271)(535.7049, 5836.862)(536.4906, 1760.7125)(535.4336, 1021.89)(518.7008, 66688.51)(519.70306, 9137.191)(519.9314, 2226.52)
Isopalmitic acid_BMDB62047	0.309604	0.105292	-0.105292	0.478108	0.235332	0.481364	-0.931094	0.1853	-1.04197	-0.136395	-24.7547	-24.6377	Isopalmitic acid_BMDB62047	Isopalmitic acid_BMDB62047 [ C16 H32 O2, tgt=86.32, overall=86.32 ]			(239.23183, 1157.7214)(279.22736, 1053435.8)(280.23065, 177087.17)(281.23422, 12487.436)(261.21674, 157060.47)(262.2192, 21958.373)
L-Arginine_BMDB00517	1.11761	0.176131	0.446259	1.01091	0.352189	0.471965	-19.8334	-0.612754	-19.7544	-18.9232	-19.0715	-0.176131	L-Arginine_BMDB00517	L-Arginine_BMDB00517 [ C6 H14 N4 O2, tgt=72.98, overall=72.98 ]			(174.10896, 4481.76)(156.0989, 57601.164)(157.10179, 3382.8367)(158.1138, 1490.85)(180.09583, 1647.1167)
DG(15:0/12:0(3-OH)/0:0)-PAMDB006898	-23.7	2.36142	-24.0287	-1.56468	-0.167295	-23.5232	1.84833	0.186414	0.167295	0.914203	3.27496	-22.8103	DG(15:0/12:0(3-OH)/0:0)-PAMDB006898	DG(15:0/12:0(3-OH)/0:0)-PAMDB006898 [ C30H58O6, tgt= ]			(517.2178, 262384.66)(517.4189, 131890.97)(518.42163, 25335.916)(519.4263, 3437.035)(521.4464, 60537.812)(534.9752, 10662.235)(536.0429, 7361.989)(537.478, 3570.2117)(540.5823, 17759.18)(541.58636, 5770.942)(542.1763, 156311.38)(543.43475, 99355.07)(525.4044, 36.36)
DG(10:0(3-OH)/16:1(9Z)/0:0)-PAMDB006861	-0.497854	1.7216	0.53768	-25	0.952112	-0.0607738	0.584867	0.0846653	0.0607738	-24.2415	-24.3898	-24.2728	DG(10:0(3-OH)/16:1(9Z)/0:0)-PAMDB006861	DG(10:0(3-OH)/16:1(9Z)/0:0)-PAMDB006861 [ C29 H54 O6, tgt=45.37, overall=45.37 ]			(521.3719, 218627.61)(522.3746, 55773.08)(523.37665, 5959.077)(516.41693, 535265.2)(517.4198, 152778.48)(518.42145, 18359.033)(519.4264, 3565.5925)(502.3994, 17214.46)(503.402, 3635.32)(507.389, 1305.47)(508.3997, 799.23)
1-Acyl-sn-glycero-3-phosphoglycerol(N-C16:0)-PAMDB001532	0.380843	-0.735175	-0.370879	0.163861	-0.20255	0.366384	-0.27341	-0.163861	-0.672416	0.40968	0.289323	0.715499	1-Acyl-sn-glycero-3-phosphoglycerol(N-C16:0)-PAMDB001532	1-Acyl-sn-glycero-3-phosphoglycerol(N-C16:0)-PAMDB001532 [ C22 H44 O9 P, tgt=81.95, overall=81.95 ]			(471.29578, 2600.49)(483.2976, 54769.105)(484.30008, 9801.157)(485.3033, 337.35)
DG(15:0cyclo/18:1(9Z)/0:0)-PAMDB006906	-2.39361	0.28745	0.0212317	1.1891	0.486894	0.274919	-0.268937	0.602189	-0.0212317	-23.6357	-23.784	-2.6432	DG(15:0cyclo/18:1(9Z)/0:0)-PAMDB006906	DG(15:0cyclo/18:1(9Z)/0:0)-PAMDB006906 [ C36 H66 O5, tgt=63.21, overall=63.21 ]			(560.4759, 7957.7197)(561.47253, 1923.4187)(563.2542, 26649.027)(564.5049, 4833.497)(565.5059, 2421.3)(578.5106, 21651.459)(579.51935, 7771.627)(602.16504, 88881.875)(603.5029, 4924.66)(585.47974, 9928.234)(586.2582, 3001.7666)(587.4854, 2672.8533)(588.48627, 912.69995)(588.4796, 332.44)
PE(17:0cycw7c/14:0)-PAMDB006681	-0.483542	-0.801514	-0.441837	0.0284328	-0.260174	-0.0619488	0.428246	0.276957	0.523794	0.728914	-0.0284328	0.213163	PE(17:0cycw7c/14:0)-PAMDB006681	PE(17:0cycw7c/14:0)-PAMDB006681 [ C36 H70 N O8 P, tgt=68.87, overall=68.87 ]			(676.4862, 20623.46)(677.4929, 6930.526)(678.4941, 3824.8767)(658.4963, 9718.027)(699.5246, 1366.3)(675.50616, 43419.336)(676.51013, 13335.505)(680.46783, 15523.678)(681.4703, 5109.992)
L-Carnitine_BMDB00062	-0.0128775	0.013484	-0.413274	0.18834	0.0128775	0.23895	-0.206668	0.337972	-0.24632	0.361056	-20.9194	-20.8024	L-Carnitine_BMDB00062	L-Carnitine_BMDB00062 [ C7 H15 N O3, tgt=77.88, overall=77.88 ]			(163.10852, 5219.0635)(165.1104, 281.37)(145.09822, 4109.4023)(165.12361, 2972.0723)(147.11353, 7829.62)(179.13957, 34136.566)(180.14255, 2043.3551)(161.12938, 27674.443)(162.1323, 943.78204)
PS(17:0cycw7c/19:iso)-PAMDB003998	9.49066	8.36748	8.75709	9.62824	8.78972	8.94538	-9.27763	-9.21194	-9.19865	-8.36748	-8.51574	-8.39877	PS(17:0cycw7c/19:iso)-PAMDB003998	PS(17:0cycw7c/19:iso)-PAMDB003998 [ C42 H78 N O10 P, tgt=15.59, overall=15.59 ]			(810.5405, 12158.715)(811.5432, 3021.5583)
(1S)-Hydroxy-(2S)-glutathionyl-12-dihydronaphthalene-PAMDB000855	-0.210671	0.113038	-0.0840197	0.281228	-0.0858049	0.0840197	-0.230989	-0.211526	-0.262509	0.603538	0.545003	0.459983	(1S)-Hydroxy-(2S)-glutathionyl-12-dihydronaphthalene-PAMDB000855	(1S)-Hydroxy-(2S)-glutathionyl-12-dihydronaphthalene-PAMDB000855 [ C20 H25 N3 O7 S, tgt=57.85, overall=57.85 ]			(453.15952, 153900.38)(454.16196, 27580.139)(455.15942, 7939.986)
N-carbamoyl-L-aspartate-PAMDB006306	-0.533291	21.4055	20.5657	-0.370783	-0.644423	-0.356445	-0.522411	-0.456724	19.3107	0.387732	21.7915	0.356443	N-carbamoyl-L-aspartate-PAMDB006306	N-carbamoyl-L-aspartate-PAMDB006306 [ C5 H6 N2 O5, tgt=65.79, overall=65.79 ]			(157.02142, 109968.98)(158.0244, 2580.4749)
CDP-DG(19:1(9Z)/15:0)-PAMDB003776	-0.126179	16.4722	-0.454918	0.0363293	-0.23731	0.0506668	-0.115299	-0.049612	-0.0363274	17.6155	19.8952	17.6343	CDP-DG(19:1(9Z)/15:0)-PAMDB003776	CDP-DG(19:1(9Z)/15:0)-PAMDB003776 [ C46 H83 N3 O15 P2, tgt= ]			(979.5456, 1956.58)(997.559, 8719.345)(998.5616, 5412.7354)
1-Acyl-sn-glycero-3-phosphoethanolamine(N-C16:0)-PAMDB001525	-0.293255	0.0121555	0.230476	-0.0121555	-0.369999	-0.0184898	0.531805	0.550869	0.663525	-17.531	-0.253689	0.692057	1-Acyl-sn-glycero-3-phosphoethanolamine(N-C16:0)-PAMDB001525	1-Acyl-sn-glycero-3-phosphoethanolamine(N-C16:0)-PAMDB001525 [ C21 H44 N O7 P, tgt=52.01, overall=52.01 ]			(478.28265, 1452.3319)(454.28378, 23480.91)(455.28653, 2741.79)(460.26144, 446648.4)(461.2642, 109118.72)(462.266, 11195.555)
PG(14:0/16:0)-PAMDB001437	-19.4875	-0.561397	-0.0882654	0.74089	-0.0494146	0.0494146	-19.4766	0.393567	0.957051	1.67849	1.83727	-18.5977	PG(14:0/16:0)-PAMDB001437	PG(14:0/16:0)-PAMDB001437 [ C36H71O10P, tgt= ]			(676.4874, 19375.81)(677.5014, 6763.545)(679.482, 18084.404)(679.90643, 6832.253)(718.5236, 10796.823)(722.49005, 20139.45)(723.4927, 5447.71)
1-Hexanol_BMDB12971	0.597033	-0.245244	-0.0108309	0.577794	0.11041	0.231261	-0.820445	-0.184863	-0.915349	0.0108309	-0.183213	0.119853	1-Hexanol_BMDB12971	1-Hexanol_BMDB12971 [ C6 H14 O, tgt=85.80, overall=85.80 ]			(125.093834, 115916.586)(126.0968, 5744.931)(107.08362, 68504.836)(108.086555, 2865.155)
CoproporphyrinogenIII-PAMDB000314	-0.34768	-0.311791	0.70575	-21.9631	-0.382207	-21.9488	0.900146	-0.0778036	0.733504	1.91139	0.0778036	1.86657	CoproporphyrinogenIII-PAMDB000314	CoproporphyrinogenIII-PAMDB000314 [ C36 H44 N4 O8, tgt=40.86, overall=40.86 ]			(684.3649, 1954.363)(669.76013, 1812.8767)(670.6002, 5370.784)(671.3175, 1600.3159)(666.3534, 2875.77)
PG(10:0/12:0(3-OH))-PAMDB004036	-0.0403547	0.0176706	-0.302957	-0.521392	-0.383344	-0.138915	0.892104	-0.0176706	0.469525	1.45491	0.749696	1.11184	PG(10:0/12:0(3-OH))-PAMDB004036	PG(10:0/12:0(3-OH))-PAMDB004036 [ C28 H55 O11 P, tgt=79.69, overall=79.69 ]			(599.3798, 142055.36)(600.3823, 36589.105)(601.38385, 4018.0208)(603.3275, 826.942)
PG(14:0/12:0(3-OH))-PAMDB004072	0.575754	0.207411	0.0662022	0.228659	0.0963306	-0.0876827	-1.07702	-0.0889358	-1.05029	-0.0662022	-0.622459	0.216705	PG(14:0/12:0(3-OH))-PAMDB004072	PG(14:0/12:0(3-OH))-PAMDB004072 [ C32 H63 O11 P, tgt=66.97, overall=66.97 ]			(638.4056, 5712.765)(639.408, 1553.6918)(678.3972, 26740.463)(679.39984, 6747.4546)(680.4018, 267.33)
Ubiquinone-7-PAMDB001978	-0.920743	-1.70638	1.62853	2.1675	-1.68605	0.920743	1.31287	1.22042	0.997226	-24.5474	-4.5515	-4.49529	Ubiquinone-7-PAMDB001978	Ubiquinone-7-PAMDB001978 [ C44 H66 O4, tgt=26.67, overall=26.67 ]			(659.2532, 1368.6226)(640.5037, 774.81)(659.50977, 174632.9)(660.51245, 60663.492)(661.51776, 17333.492)(662.5271, 2030.48)(646.49927, 4304.2217)(646.49603, 1672.7633)(647.5066, 16135.345)(676.82935, 7398.7397)(678.2794, 1745.135)(661.0226, 73301.81)(662.2787, 30946.695)(663.28143, 2357.2424)(682.49, 7047.784)(684.5115, 5171.2104)
beta-D-Fructose6-phosphate-PAMDB000547	-0.831249	18.568	17.8579	-0.668741	-0.942381	-0.654404	-0.82037	17.3699	17.7674	0.0897732	-0.0584831	0.058485	beta-D-Fructose6-phosphate-PAMDB000547	beta-D-Fructose6-phosphate-PAMDB000547 [ C6 H13 O9 P, tgt=48.78, overall=48.78 ]			(261.03217, 2155.51)(260.04822, 28408.873)(261.54883, 695.8)(262.0468, 497.13)(283.01324, 1107.245)
3-Decenoic acid_BMDB62086	0.581192	-0.356915	-0.0151329	0.636387	0.0427856	0.103046	-0.599228	-1.37123	-3.19981	0.700073	-19.8557	0.0151329	3-Decenoic acid_BMDB62086	3-Decenoic acid_BMDB62086 [ C10 H18 O2, tgt=53.30, overall=53.30 ]			(155.3824, 6254.3047)(153.12444, 14035.112)(154.1268, 658.38)(188.16069, 3280.7185)(170.1508, 81699.375)(171.15373, 5786.985)(193.11842, 8345.48)(194.11795, 1372.4551)(176.31291, 20939.7)(176.11168, 396.06668)
PE(16:1(9Z)/18:1(9Z))-PAMDB006233	1.5334	-0.224635	-1.83074	-19.3594	4.37516	-19.3451	-19.511	-0.882234	0.224635	5.07224	1.82266	3.73239	PE(16:1(9Z)/18:1(9Z))-PAMDB006233	PE(16:1(9Z)/18:1(9Z))-PAMDB006233 [ C39 H74 N O8 P, tgt=64.14, overall=64.14 ]			(718.5207, 5702.0566)(719.02576, 3469.81)(720.0226, 3380.645)(721.5189, 941.68)(703.5142, 57.67)(717.8532, 7102.6035)(719.5156, 4751.25)(721.5176, 1366.35)(700.2628, 2930.8477)(700.8481, 5851.3535)(701.85504, 13932.993)(702.861, 7247.9766)(703.86884, 18809.244)(704.53625, 9225.59)(735.5534, 8023.929)(736.8048, 2372.0176)(743.42004, 26596.29)(743.5256, 2651.31)(744.5384, 4914.14)(721.4923, 9818.51…
1-hydroxy-2-nonenyl-14-dihydroquinolin-4-one-PAMDB100094	0.657529	0.43014	0.0289068	0.672433	0.51163	0.705056	-21.6466	-21.5809	-1.50686	-20.7364	-0.566955	-0.0289068	1-hydroxy-2-nonenyl-14-dihydroquinolin-4-one-PAMDB100094	1-hydroxy-2-nonenyl-14-dihydroquinolin-4-one-PAMDB100094 [ C18 H24 N O2, tgt=50.80, overall=50.80 ]			(271.1842, 265.72)(304.21927, 158056.42)(305.2218, 20397.209)(306.2268, 811.255)
CDP-DG(17:0cycw7c/15:0cyclo)-PAMDB006818	0.172229	0.448964	0.118407	-0.121745	-0.0606852	-0.15692	0.0606852	-1.29048	-0.0706434	0.95082	-0.923909	0.88004	CDP-DG(17:0cycw7c/15:0cyclo)-PAMDB006818	CDP-DG(17:0cycw7c/15:0cyclo)-PAMDB006818 [ C44 H77 N3 O15 P2, tgt=38.59, overall=38.59 ]			(972.46356, 58788.41)(973.4664, 34231.457)(974.467, 1517.7761)
PS(17:0cycw7c/10:0(3-OH))-PAMDB003995	-0.255841	-0.645038	-1.01435	-0.651956	-0.753209	-0.932342	0.48903	0.255841	0.569871	0.258786	1.37655	0.281997	PS(17:0cycw7c/10:0(3-OH))-PAMDB003995	PS(17:0cycw7c/10:0(3-OH))-PAMDB003995 [ C33 H60 N O11 P, tgt=68.29, overall=68.29 ]			(678.3961, 33588.227)(679.3988, 8820.237)(680.4018, 267.33)(682.3519, 83191.055)(683.3544, 22854.072)(684.3562, 1643.3717)
1-Tetradecanoyl-sn-glycerol3-phosphate-PAMDB001542	0.673032	0.416842	0.491048	0.241828	-0.303271	-0.0532579	-0.342584	0.0532579	-2.81352	-1.48741	0.714236	-2.11128	1-Tetradecanoyl-sn-glycerol3-phosphate-PAMDB001542	1-Tetradecanoyl-sn-glycerol3-phosphate-PAMDB001542 [ C17 H33 O7 P, tgt=53.57, overall=53.57 ]			(403.24817, 1402.4767)(404.19894, 32385.768)(405.20187, 4948.4507)(406.2044, 127.79)(387.17358, 261904.64)(388.17642, 48129.168)(389.17847, 4580.093)
N-(gamma-L-glutamyl)-L-alaninol-PAMDB100021	0.755556	0.0466366	-0.280035	0.764549	0.472328	0.646856	-1.37664	0.0599442	-1.24669	-0.448288	-0.410715	-0.0466366	N-(gamma-L-glutamyl)-L-alaninol-PAMDB100021	N-(gamma-L-glutamyl)-L-alaninol-PAMDB100021 [ C8 H16 N2 O4, tgt=68.46, overall=68.46 ]			(222.14265, 92895.13)(223.14546, 6436.315)(224.1579, 788.38)
Sarcosine_BMDB00271	0.593251	-0.263701	-0.0145559	0.672793	0.223514	0.311816	-0.91915	-0.225999	-1.00128	0.0145559	-0.117753	0.140693	Sarcosine_BMDB00271	Sarcosine_BMDB00271 [ C3 H7 N O2, tgt=59.11, overall=59.11 ]			(107.08362, 72683.336)(108.086555, 3063.5576)
2-heptyl-3-hydroxy-4-quinolone-PAMDB100045	-0.0730972	0.563881	-18.4164	0.0839901	0.232895	0.454533	-18.0768	0.995279	-17.9978	0.0211201	-17.3149	-0.0211201	2-heptyl-3-hydroxy-4-quinolone-PAMDB100045	2-heptyl-3-hydroxy-4-quinolone-PAMDB100045 [ C16 H21 N O2, tgt=9.56, overall=9.56 ]			(260.15723, 12213.7)(261.41254, 794.5725)(262.1722, 1821.91)(246.1648, 325.84668)(260.15775, 11486.628)(261.1578, 1987.59)(245.50127, 718.5267)(282.1984, 1935.4033)(264.18872, 130309.055)(265.1364, 405.33)
(R)-(2-chloro-5-oxo-25-dihydro-2-furyl)acetate-PAMDB100030	21.5042	17.3679	-0.796375	-0.305128	-0.578768	23.9265	-0.456757	-0.391069	-0.377785	0.453386	0.30513	23.4914	(R)-(2-chloro-5-oxo-25-dihydro-2-furyl)acetate-PAMDB100030	(R)-(2-chloro-5-oxo-25-dihydro-2-furyl)acetate-PAMDB100030 [ C6 H4 Cl O4, tgt=50.73, overall=50.73 ]			(176.98074, 10007.11)(158.9715, 22850.203)(160.3037, 24135.453)(160.97195, 4025.14)(159.9709, 39175.24)(177.00334, 13791.867)(182.95857, 1198.2233)
(S)-14-Methylhexadecanoic acid_BMDB62046	0.30055	-0.0630779	-0.223017	0.36594	0.0736389	0.403433	-1.19814	0.0630779	0.481794	-0.382641	-18.7456	-18.6286	(S)-14-Methylhexadecanoic acid_BMDB62046	(S)-14-Methylhexadecanoic acid_BMDB62046 [ C17 H34 O2, tgt=98.99, overall=98.99 ]			(253.2469, 1082.905)(256.2605, 7844102.5)(257.2631, 1641677.0)(258.2659, 137139.61)(296.25354, 5551562.0)(297.25684, 1057812.6)(298.26004, 100282.19)(277.5452, 5033.028)(278.6903, 39817.203)(280.25763, 229927.31)
5-Aminolevulinicacid-PAMDB000275	8.89374	8.74601	8.0991	8.85716	8.79638	8.78294	-9.00925	-8.94356	-8.93028	-8.0991	-8.24736	-8.13039	5-Aminolevulinicacid-PAMDB000275	5-Aminolevulinicacid-PAMDB000275 [ C5 H9 N O3, tgt=47.17, overall=47.17 ]			(115.051796, 5270.5103)(149.09294, 1591.7134)(131.08243, 8206.356)
PS(14:0(3-OH)/14:0(3-OH))-PAMDB003966	-0.0171633	0.0171633	-0.518083	-0.239234	-0.191722	-0.296107	0.502095	0.169848	0.725831	1.33209	-18.4051	1.4197	PS(14:0(3-OH)/14:0(3-OH))-PAMDB003966	PS(14:0(3-OH)/14:0(3-OH))-PAMDB003966 [ C34 H64 N O12 P, tgt=44.84, overall=44.84 ]			(713.4098, 127096.98)(714.4123, 39004.117)(715.4138, 5315.1387)(713.4116, 167780.95)(714.4142, 52535.77)
1-Tetradec-7-enoyl-sn-glycerol3-phosphate-PAMDB001541	8.84706	8.65394	8.83064	-8.58324	7.85602	-8.56891	8.45416	-8.66919	-8.6559	9.53791	-7.97299	-7.85602	1-Tetradec-7-enoyl-sn-glycerol3-phosphate-PAMDB001541	1-Tetradec-7-enoyl-sn-glycerol3-phosphate-PAMDB001541 [ C17 H31 O7 P, tgt=33.95, overall=33.95 ]			(378.18753, 10351.875)(387.17236, 4477.86)(388.16956, 1214.705)
Biotin-PAMDB000008	1.37669	1.4335	-17.6412	0.992166	0.738378	0.0329294	-0.127522	-0.0329294	-17.2226	0.608596	-16.5397	-16.4227	Biotin-PAMDB000008	Biotin-PAMDB000008 [ C10 H16 N2 O3 S, tgt=45.82, overall=45.82 ]			(226.57706, 14418.152)(231.08948, 1366.5375)(264.12152, 9285.9375)(267.11765, 19070.543)
PGP(16:0/18:0)-PAMDB006277	0.160475	0.138462	0.198771	-16.5747	-16.8484	-16.5604	0.245966	-16.6607	-0.138462	1.61568	-15.9645	0.660089	PGP(16:0/18:0)-PAMDB006277	PGP(16:0/18:0)-PAMDB006277 [ C40 H80 O13 P2, tgt=15.77, overall=15.77 ]			(854.4847, 8513.453)(855.48724, 2391.1914)
Diaminopimelicacid-PAMDB000360	0.837566	-0.0628452	-0.105236	0.771368	0.416136	0.636215	-1.11725	0.0628452	-1.01942	-0.117825	-0.538597	0.24328	Diaminopimelicacid-PAMDB000360	Diaminopimelicacid-PAMDB000360 [ C7 H14 N2 O4, tgt=92.25, overall=92.25 ]			(194.11359, 5724.0796)(208.12761, 272239.28)(209.13033, 20681.822)(210.1327, 1055.19)
DG(12:0(3-OH)/17:0cycw7c/0:0)-PAMDB006875	-11.684	12.1081	11.3857	-11.5215	-11.7951	11.3637	11.082	10.763	10.7709	-10.763	-10.9112	-10.7943	DG(12:0(3-OH)/17:0cycw7c/0:0)-PAMDB006875	DG(12:0(3-OH)/17:0cycw7c/0:0)-PAMDB006875 [ C32H60O6, tgt= ]			(544.4482, 314594.72)(545.4509, 97255.37)(546.4527, 12600.02)(547.45966, 8487.009)(558.46265, 81996.07)(559.4653, 21385.38)(560.4621, 8649.687)(561.465, 1402.4684)(563.41754, 24435.852)(564.4202, 5189.575)(565.4204, 205.72)
PS(19:iso/17:0cycw7c)-PAMDB004017	9.49066	8.36748	8.75709	9.62824	8.78972	8.94538	-9.27763	-9.21194	-9.19865	-8.36748	-8.51574	-8.39877	PS(19:iso/17:0cycw7c)-PAMDB004017	PS(19:iso/17:0cycw7c)-PAMDB004017 [ C42 H78 N O10 P, tgt=15.59, overall=15.59 ]			(810.5405, 12158.715)(811.5432, 3021.5583)
PG(14:0/19:0cycv8c)-PAMDB006495	0.420682	1.432	1.03471	-20.4867	0.58962	-0.331593	0.905972	0.0415544	-0.0415544	-19.7282	-19.8764	-19.7595	PG(14:0/19:0cycv8c)-PAMDB006495	PG(14:0/19:0cycv8c)-PAMDB006495 [ C39 H75 O10 P, tgt=24.22, overall=24.22 ]			(716.508, 18227.871)(717.5109, 6235.534)(718.5132, 90.75)(722.54034, 749.7967)(758.55676, 14825.3955)(735.5453, 553.815)(737.5546, 1555.65)(740.50726, 5997.25)(741.51, 1267.1799)
PS(19:iso/12:0)-PAMDB004009	2.15649	1.04468	0.373158	0.270677	-0.508475	-0.479127	-0.157125	-0.599015	0.157125	-18.0883	1.77085	-18.1196	PS(19:iso/12:0)-PAMDB004009	PS(19:iso/12:0)-PAMDB004009 [ C37 H70 N O10 P, tgt=60.83, overall=60.83 ]			(721.4922, 28673.21)(722.4981, 14008.52)(723.5023, 849.99)(708.49817, 148782.19)(742.52216, 9051.515)(743.52423, 1025.62)(720.8406, 8777.412)(721.884, 1538.8475)(725.4663, 767.405)
L-Alanine_BMDB00161	0.593251	-0.263701	-0.0145559	0.672793	0.223514	0.311816	-0.91915	-0.225999	-1.00128	0.0145559	-0.117753	0.140693	L-Alanine_BMDB00161	L-Alanine_BMDB00161 [ C3 H7 N O2, tgt=59.11, overall=59.11 ]			(107.08362, 72683.336)(108.086555, 3063.5576)
Octadecanoate(N-C18:0)-PAMDB001745	0.107051	-0.214364	-0.407254	0.0890017	-0.143781	0.116311	-0.337037	-0.0890017	-0.342763	0.544551	0.193011	0.63663	Octadecanoate(N-C18:0)-PAMDB001745	Octadecanoate(N-C18:0)-PAMDB001745 [ C18 H35 O2, tgt=75.56, overall=75.56 ]			(265.24847, 696519.44)(266.2513, 117648.664)(267.25415, 6824.3066)(269.6028, 877770.5)(270.85913, 442084.38)(271.02747, 407301.53)(271.2783, 167454.97)
PS(15:0cyclo/17:0cycw7c)-PAMDB006718	-20.5185	-0.086072	0.251563	0.232957	-0.090045	0.383265	0.086072	-1.00782	-0.625756	-19.5975	0.589427	1.77671	PS(15:0cyclo/17:0cycw7c)-PAMDB006718	PS(15:0cyclo/17:0cycw7c)-PAMDB006718 [ C38H68NO10P, tgt= ]			(731.46893, 13318.4795)(732.4718, 3250.396)(717.444, 336.435)
DG(16:0/18:0/0:0)-PAMDB003673	1.09805	1.46848	0.495906	-3.70233	0.241454	0.0286207	-0.284228	-0.919753	-0.0286207	-22.6704	-22.8187	1.17718	DG(16:0/18:0/0:0)-PAMDB003673	DG(16:0/18:0/0:0)-PAMDB003673 [ C37 H72 O5, tgt=27.59, overall=27.59 ]			(578.7632, 5430.3213)(579.5177, 206.53)(579.5233, 24544.1)(580.5257, 7642.96)(601.51184, 246810.42)(602.5144, 43203.957)(603.5197, 12568.613)(604.5222, 601.53)
PS(14:0/15:0cyclo)-PAMDB006710	-0.145521	-0.108856	-0.581821	-0.219355	-0.234129	-0.338436	0.388393	0.108856	0.605173	1.25394	0.43609	1.29806	PS(14:0/15:0cyclo)-PAMDB006710	PS(14:0/15:0cyclo)-PAMDB006710 [ C35 H64 N O10 P, tgt=47.95, overall=47.95 ]			(713.41016, 120633.625)(714.4126, 36948.496)(715.41406, 4999.241)
Decanoate(N-C10:0)-PAMDB001612	0.530332	0.125703	-0.125703	0.658587	0.319961	-16.8119	1.00866	-16.9122	0.430089	-16.0677	-16.216	-16.099	Decanoate(N-C10:0)-PAMDB001612	Decanoate(N-C10:0)-PAMDB001612 [ C10 H19 O2, tgt=46.55, overall=46.55 ]			(171.13481, 1528.2867)(153.12439, 7118.2383)(154.1195, 506.785)(158.151, 106261.26)(159.15388, 6532.657)(172.1659, 1973.764)(195.134, 4918.2847)(196.1376, 435.83)
Leucyl-Serine_BMDB62246	-19.9276	0.312718	0.0645266	0.96469	0.666963	0.855197	-1.38673	0.0736647	-1.35159	-0.487332	-0.656219	-0.0645266	Leucyl-Serine_BMDB62246	Leucyl-Serine_BMDB62246 [ C9H18N2O4, tgt= ]			(236.15805, 53566.21)(237.16066, 3643.75)(238.1732, 607.24)(219.15477, 1719.021)
2'-Deoxyguanosine5'-monophosphate-PAMDB000231	-0.360306	0.505995	0.216459	-1.04093	-1.40062	-0.0503254	-0.514534	0.0503254	0.232958	-0.186691	0.840239	0.120518	2'-Deoxyguanosine5'-monophosphate-PAMDB000231	2'-Deoxyguanosine5'-monophosphate-PAMDB000231 [ C10 H14 N5 O7 P, tgt=86.08, overall=86.08 ]			(348.06125, 1282.86)(335.06656, 1028.8058)(365.09924, 840037.75)(366.10226, 93274.25)(367.10306, 13454.661)
N2-Succinyl-L-ornithine-PAMDB000295	0.57678	-0.021225	-0.355221	0.628582	0.317064	0.467428	-1.22406	0.134352	-1.2191	-0.384539	-0.590538	0.021225	N2-Succinyl-L-ornithine-PAMDB000295	N2-Succinyl-L-ornithine-PAMDB000295 [ C9 H16 N2 O5, tgt=70.22, overall=70.22 ]			(250.13701, 76279.33)(251.13972, 5810.4116)(236.13708, 51487.19)(237.14067, 6519.2065)
(S)-Ureidoglycolicacid-PAMDB000223	-1.7712	3.42861	2.5888	-18.3477	-18.6213	0.155037	-1.2161	0.938555	1.33379	-17.5892	3.81456	-0.155037	(S)-Ureidoglycolicacid-PAMDB000223	(S)-Ureidoglycolicacid-PAMDB000223 [ C3 H6 N2 O4, tgt=43.12, overall=43.12 ]			(119.02577, 5847.785)(139.04735, 3917.835)(121.03707, 1051.64)(136.05899, 5948.7026)(157.02126, 57641.297)(158.0244, 2580.4749)
DG(16:1(9Z)/14:0(3-OH)/0:0)-PAMDB006914	-0.944182	0.753087	0.352559	-1.90112	0.0266409	-0.0266409	0.203818	0.102592	0.0489626	-25.293	-6.90235	-25.3243	DG(16:1(9Z)/14:0(3-OH)/0:0)-PAMDB006914	DG(16:1(9Z)/14:0(3-OH)/0:0)-PAMDB006914 [ C33 H62 O6, tgt=49.95, overall=49.95 ]			(577.43335, 233386.86)(578.4362, 70085.41)(579.43854, 9365.79)(580.4394, 592.51)(572.7798, 554152.9)(573.7827, 193154.11)(574.78595, 44227.535)(578.5127, 48242.2)(558.46173, 28225.06)(559.46454, 7072.246)(560.4626, 4307.07)(561.4662, 703.0)(563.4522, 1318.4067)(560.4932, 10180.23)
DG(17:0/16:1(9Z)/0:0)-PAMDB006456	0.43595	1.50626	0.0709658	1.31169	-0.0709658	-0.584905	0.977351	-0.30107	0.984223	-20.3269	-20.4752	-2.3566	DG(17:0/16:1(9Z)/0:0)-PAMDB006456	DG(17:0/16:1(9Z)/0:0)-PAMDB006456 [ C36 H68 O5, tgt=54.87, overall=54.87 ]			(563.49097, 3828.8657)(565.5071, 10906.234)(566.5089, 3305.92)(604.51636, 2258.4668)(564.5221, 1957.71)(582.5135, 4578.38)(587.9288, 39369.79)(587.4952, 15057.898)(588.49677, 1683.4349)(580.5247, 7599.29)
4-Phospho-D-erythronate-PAMDB000943	-19.7428	0.559322	0.456778	-19.5803	-1.44925	-0.237768	0.237768	0.247831	0.265739	-18.8218	2.43505	-18.8531	4-Phospho-D-erythronate-PAMDB000943	4-Phospho-D-erythronate-PAMDB000943 [ C4H9O8P, tgt= ]			(199.99669, 20654.59)(201.20078, 439.748)(240.99995, 5879.9062)(241.99957, 2314.77)(242.99872, 1843.0634)(243.99817, 399.62668)(217.01144, 29152.629)(223.98471, 636.022)
Meso-26-Diaminoheptanedioate-PAMDB002055	0.837566	-0.0628452	-0.105236	0.771368	0.416136	0.636215	-1.11725	0.0628452	-1.01942	-0.117825	-0.538597	0.24328	Meso-26-Diaminoheptanedioate-PAMDB002055	Meso-26-Diaminoheptanedioate-PAMDB002055 [ C7 H14 N2 O4, tgt=92.25, overall=92.25 ]			(194.11359, 5724.0796)(208.12761, 272239.28)(209.13033, 20681.822)(210.1327, 1055.19)
DG(18:1(11Z)/0:0/18:0)-PAMDB006458	0.482298	1.75502	3.13541	4.39574	1.67216	4.04458	-1.58787	-0.482298	-2.44229	-22.4596	-22.6079	-22.4909	DG(18:1(11Z)/0:0/18:0)-PAMDB006458	DG(18:1(11Z)/0:0/18:0)-PAMDB006458 [ C39 H74 O5, tgt=60.79, overall=60.79 ]			(605.5359, 7751.8525)(606.5392, 31.775002)(645.6144, 317.86)(628.0902, 571088.25)(629.09515, 221450.5)(630.09814, 38308.56)(631.54596, 6152.722)
L-Arginine-PAMDB000146	1.11761	0.176131	0.446259	1.01091	0.352189	0.471965	-19.8334	-0.612754	-19.7544	-18.9232	-19.0715	-0.176131	L-Arginine-PAMDB000146	L-Arginine-PAMDB000146 [ C6 H14 N4 O2, tgt=72.98, overall=72.98 ]			(174.10896, 4481.76)(156.0989, 57601.164)(157.10179, 3382.8367)(158.1138, 1490.85)(180.09583, 1647.1167)
PS(14:0/18:0)-PAMDB006258	-0.133348	18.2593	-0.462088	19.3736	-0.24448	0.0434971	-0.122469	-0.0567818	-0.0434971	0.787674	0.639418	0.756386	PS(14:0/18:0)-PAMDB006258	PS(14:0/18:0)-PAMDB006258 [ C38H74NO10P, tgt= ]			(718.523, 12173.52)(719.52637, 3515.08)(755.5624, 206.28)
10Z-Pentadecenoic acid_BMDB63571	1.29842	1.19033	-0.199629	0.261703	0.0050621	0.259024	-0.0165539	-0.0050621	-0.633066	0.0287933	-20.1648	-20.0478	10Z-Pentadecenoic acid_BMDB63571	10Z-Pentadecenoic acid_BMDB63571 [ C15 H28 O2, tgt=55.45, overall=55.45 ]			(223.631, 2198.9285)(226.21187, 28280.062)(227.2149, 3168.31)(226.2122, 3755.31)(261.25235, 4378.7227)(262.25534, 312.185)(245.22148, 40729.99)(246.22467, 4541.23)(247.20087, 3124.3826)(250.20903, 986.9367)(240.22778, 72170.586)(241.23059, 7613.572)(242.24017, 418.99667)
PS(10:0/12:0(3-OH))-PAMDB003940	16.1702	16.0226	-0.803545	-0.312298	-0.585938	-0.29796	16.468	-0.398239	-0.384954	17.3862	0.29796	0.414928	PS(10:0/12:0(3-OH))-PAMDB003940	PS(10:0/12:0(3-OH))-PAMDB003940 [ C28 H52 N O11 P, tgt=16.02, overall=16.02 ]			(633.838, 6322.415)(634.3408, 925.92)(635.33636, 1269.0033)(597.3266, 383.68)
DG(15:0cyclo/16:1(9Z)/0:0)-PAMDB006904	-22.2954	-0.847407	-22.6241	-22.1329	-22.4065	2.67654	2.37412	0.847407	2.33818	3.48931	-21.5226	2.8287	DG(15:0cyclo/16:1(9Z)/0:0)-PAMDB006904	DG(15:0cyclo/16:1(9Z)/0:0)-PAMDB006904 [ C34H62O5, tgt= ]			(534.95374, 1535.07)(536.47565, 3881.1685)(537.97906, 4647.26)(538.4811, 2001.27)(550.48096, 48318.66)(551.4878, 1479.56)(575.9593, 1879.9475)(577.4586, 411.54)(557.64795, 8166.232)(558.12427, 6379.4766)(559.1297, 3601.7002)(560.116, 314.07666)
4-Hydroxy-L-threonine-PAMDB000940	-21.8786	-0.0202627	-22.2074	0.652604	0.128182	0.252086	-0.463655	0.0202627	-0.66446	0.149823	-0.224965	0.234048	4-Hydroxy-L-threonine-PAMDB000940	4-Hydroxy-L-threonine-PAMDB000940 [ C4H9NO4, tgt= ]			(153.08813, 115954.125)(154.09126, 6039.9917)(155.10315, 286.385)(135.07767, 40035.605)(136.08072, 1863.2714)(162.0513, 3348.26)
PS(10:0(3-OH)/12:0)-PAMDB003927	16.1702	16.0226	-0.803545	-0.312298	-0.585938	-0.29796	16.468	-0.398239	-0.384954	17.3862	0.29796	0.414928	PS(10:0(3-OH)/12:0)-PAMDB003927	PS(10:0(3-OH)/12:0)-PAMDB003927 [ C28 H52 N O11 P, tgt=16.02, overall=16.02 ]			(633.838, 6322.415)(634.3408, 925.92)(635.33636, 1269.0033)(597.3266, 383.68)
PG(18:1(9Z)/10:0(3-OH))-PAMDB004095	0.904306	0.346188	-0.574421	-0.0171738	-0.195021	0.0171738	-0.342915	-0.430479	-0.659021	0.245241	0.516735	0.813459	PG(18:1(9Z)/10:0(3-OH))-PAMDB004095	PG(18:1(9Z)/10:0(3-OH))-PAMDB004095 [ C34 H65 O11 P, tgt=46.61, overall=46.61 ]			(685.4231, 53497.215)(686.42584, 18731.459)(662.4268, 630.6434)(665.1973, 788236.44)(664.445, 838546.1)(665.4479, 181437.12)(666.44965, 17845.559)(680.4672, 21475.63)(681.47, 7367.1133)
DG(19:iso/14:0(3-OH)/0:0)-PAMDB006948	-20.1508	6.29306	-0.240697	-19.9883	5.66014	0.243201	0.511674	0.240697	-20.0609	-19.2297	2.71182	-1.22953	DG(19:iso/14:0(3-OH)/0:0)-PAMDB006948	DG(19:iso/14:0(3-OH)/0:0)-PAMDB006948 [ C36H70O6, tgt= ]			(601.2622, 267716.84)(601.9416, 117960.49)(603.0179, 29472.232)(604.0225, 8707.066)(604.5221, 1643.4851)(582.51294, 2290.045)(583.5129, 101.11)(625.85175, 46744.45)(626.85425, 14366.29)(626.52405, 576437.56)(627.527, 228559.48)
DG(14:0/14:0/0:0)-PAMDB003651	-1.41117	-2.4348	0.0582428	-23.431	1.63198	-0.0582428	0.508856	0.12331	-0.129759	3.34768	0.642914	-1.08233	DG(14:0/14:0/0:0)-PAMDB003651	DG(14:0/14:0/0:0)-PAMDB003651 [ C31 H60 O5, tgt=45.39, overall=45.39 ]			(494.41882, 8531.014)(495.43134, 73688.05)(496.43423, 17552.883)(497.43658, 2293.38)(534.6793, 17371.271)(535.7049, 5836.862)(536.4906, 1760.7125)(535.4336, 1021.89)(518.7008, 66688.51)(519.70306, 9137.191)(519.9314, 2226.52)
PE(19:0cycv8c/19:0cycv8c)-PAMDB006699	1.19933	1.08881	-16.7042	-16.213	-16.4866	-16.1987	-0.131385	-16.2989	0.131385	0.692618	0.911647	2.63672	PE(19:0cycv8c/19:0cycv8c)-PAMDB006699	PE(19:0cycv8c/19:0cycv8c)-PAMDB006699 [ C43 H82 N O8 P, tgt=11.89, overall=11.89 ]			(772.5994, 4728.447)(773.6, 474.89502)(760.57117, 23421.84)(777.5552, 1584.39)
DG(19:iso/17:0cycw7c/0:0)-PAMDB006950	0.482298	1.75502	3.13541	4.39574	1.67216	4.04458	-1.58787	-0.482298	-2.44229	-22.4596	-22.6079	-22.4909	DG(19:iso/17:0cycw7c/0:0)-PAMDB006950	DG(19:iso/17:0cycw7c/0:0)-PAMDB006950 [ C39 H74 O5, tgt=60.79, overall=60.79 ]			(605.5359, 7751.8525)(606.5392, 31.775002)(645.6144, 317.86)(628.0902, 571088.25)(629.09515, 221450.5)(630.09814, 38308.56)(631.54596, 6152.722)
O-Succinylcarnitine_BMDB62656	11.6144	11.1381	-12.3566	-11.8653	-12.139	-11.851	11.254	11.528	11.1904	12.6957	-11.2551	-11.1381	O-Succinylcarnitine_BMDB62656	O-Succinylcarnitine_BMDB62656 [ C11 H19 N O6, tgt=98.38, overall=98.38 ]			(263.12213, 475.3)(279.15457, 374034.9)(280.15732, 47967.363)(281.15945, 2892.615)
Tetracosapentaenoic acid (24:5n-3)_BMDB06323	10.6424	9.27004	10.1635	-10.0285	-10.3022	9.80652	-10.1802	-10.1145	-10.1012	-9.27004	10.0107	10.5794	Tetracosapentaenoic acid (24:5n-3)_BMDB06323	Tetracosapentaenoic acid (24:5n-3)_BMDB06323 [ C24 H38 O2, tgt=30.76, overall=30.76 ]			(362.2903, 5927.7573)(340.27542, 6101.035)(376.31146, 17862.115)(377.314, 1411.98)
gamma-Glutamyl-beta-cyanoalanine-PAMDB000998	0.399543	0.10002	-0.10002	-0.189256	-0.443044	-0.398908	-18.483	-0.120513	0.102807	0.887385	0.626534	0.92389	gamma-Glutamyl-beta-cyanoalanine-PAMDB000998	gamma-Glutamyl-beta-cyanoalanine-PAMDB000998 [ C9 H13 N3 O5, tgt=67.57, overall=67.57 ]			(243.08327, 22679.684)(244.08582, 889.90375)(226.07487, 15476.714)(230.09169, 1929.8232)
CDP-DG(12:0(3-OH)/10:0)-PAMDB006760	18.1503	19.9453	-1.23412	19.3711	20.352	18.2501	-0.894499	-0.828812	-0.815527	0.0156441	-0.132612	-0.0156441	CDP-DG(12:0(3-OH)/10:0)-PAMDB006760	CDP-DG(12:0(3-OH)/10:0)-PAMDB006760 [ C34 H61 N3 O16 P2, tgt=46.04, overall=46.04 ]			(851.38184, 160704.4)(852.38477, 71746.91)(853.3862, 13901.889)
Homocysteine_BMDB00742	17.4983	16.2188	-0.803545	-0.312298	-0.585938	-0.29796	16.7599	-0.398239	-0.384954	0.446217	0.29796	0.414928	Homocysteine_BMDB00742	Homocysteine_BMDB00742 [ C4 H9 N O2 S, tgt=44.46, overall=44.46 ]			(137.04245, 1140.8049)(136.0589, 9472.7)(158.02393, 9129.09)
GlcNAc-MurNAc-L-alanyl-gamma-D-glutamyl-meso-diaminopimelyl-D-alanine-PAMDB003536	-0.465664	-0.419683	-0.576582	0.354486	-0.0758839	0.1042	0.0758839	-0.194227	-0.146866	0.898548	0.59581	0.743158	GlcNAc-MurNAc-L-alanyl-gamma-D-glutamyl-meso-diaminopimelyl-D-alanine-PAMDB003536	GlcNAc-MurNAc-L-alanyl-gamma-D-glutamyl-meso-diaminopimelyl-D-alanine-PAMDB003536 [ C34 H57 N7 O19, tgt=47.76, overall=47.76 ]			(867.355, 5387.4834)(868.3563, 1228.3401)(851.38354, 166438.72)(852.3864, 73823.805)(853.38794, 13987.645)(854.3878, 220.78)
PS(17:0cycw7c/14:0(3-OH))-PAMDB003997	18.1236	17.5362	-0.498417	-0.00716972	-0.280809	0.00716782	-0.158798	-0.093111	-0.0798264	0.751345	0.603088	0.720057	PS(17:0cycw7c/14:0(3-OH))-PAMDB003997	PS(17:0cycw7c/14:0(3-OH))-PAMDB003997 [ C37 H68 N O11 P, tgt=38.03, overall=38.03 ]			(717.4426, 9497.175)(718.4457, 1713.0901)
PS(19:0cycv8c/10:0(3-OH))-PAMDB004003	0.446651	0.0849552	0.0247421	-0.2211	-0.0247421	-0.42104	0.941576	-0.623127	0.687801	2.06125	-17.1213	-17.0044	PS(19:0cycv8c/10:0(3-OH))-PAMDB004003	PS(19:0cycv8c/10:0(3-OH))-PAMDB004003 [ C35 H64 N O11 P, tgt=55.17, overall=55.17 ]			(688.41785, 16205.315)(689.4205, 4153.374)
510-Methenyltetrahydrofolicacid-PAMDB006184	0.241359	-0.142901	-0.554612	-17.6666	-17.9402	-17.6523	0.58134	-0.317718	0.142901	1.31369	0.466998	1.8483	510-Methenyltetrahydrofolicacid-PAMDB006184	510-Methenyltetrahydrofolicacid-PAMDB006184 [ C20 H21 N7 O6, tgt=31.99, overall=31.99 ]			(455.1598, 8735.82)(437.8648, 12324.766)(438.15152, 1027.4417)(456.1744, 22990.824)(457.177, 1832.015)(474.18375, 3743.7551)(478.15503, 3343.4448)
PG(19:iso/12:0(3-OH))-PAMDB004106	-0.670749	0.0442247	-0.0792932	-0.0606051	-0.0431986	0.0497141	0.151595	0.118281	0.187457	-0.659783	-1.9378	0.0431986	PG(19:iso/12:0(3-OH))-PAMDB004106	PG(19:iso/12:0(3-OH))-PAMDB004106 [ C37 H73 O11 P, tgt=70.90, overall=70.90 ]			(706.4804, 353.95)(742.52435, 35968.926)(743.52704, 12776.613)(744.53094, 758.5485)(731.4699, 1496.48)
S-Acetyldihydrolipoamide-PAMDB000411	-0.189697	-0.0778351	-0.265589	0.0272045	-0.230595	-0.0272045	0.0697308	-0.479113	0.112017	0.964035	0.447697	0.799568	S-Acetyldihydrolipoamide-PAMDB000411	S-Acetyldihydrolipoamide-PAMDB000411 [ C10 H19 N O2 S2, tgt=61.27, overall=61.27 ]			(267.1181, 100155.98)(268.1209, 8673.953)(249.10716, 3325.0623)
7E-Octadecenoic acid_BMDB63573	1.12068	1.10453	-0.0868387	0.10583	0.453221	0.441457	0.000628471	-28.7171	-0.000628471	-27.8726	-28.0209	-27.9039	7E-Octadecenoic acid_BMDB63573	7E-Octadecenoic acid_BMDB63573 [ C18 H34 O2, tgt=92.28, overall=92.28 ]			(265.24823, 618703.56)(266.25113, 103802.586)(267.25403, 5969.9224)(268.2583, 30389.469)(269.26117, 4040.67)(282.27487, 1.1771028E7)(283.27762, 2574014.2)(284.28137, 257109.73)(285.28442, 12465.175)
PG(19:iso/12:0)-PAMDB004105	2.05312	0.613619	-23.748	0.40502	0.158459	-0.158459	-0.603779	-0.512297	-0.560699	-22.4983	1.8098	1.63563	PG(19:iso/12:0)-PAMDB004105	PG(19:iso/12:0)-PAMDB004105 [ C37 H73 O10 P, tgt=48.96, overall=48.96 ]			(694.481, 2599.76)(695.484, 804.79)(729.4028, 5643.1475)(728.5351, 1099.59)(729.5462, 5266.34)(709.01166, 86380.586)(710.0143, 33554.082)(710.5038, 9640.376)(731.4689, 7569.12)(732.4718, 1519.734)
PG(16:1(9Z)/14:0)-PAMDB001451	1.95778	-0.218606	-18.9264	0.192035	1.49855	-0.192035	-0.231694	-0.423762	-0.460401	1.16681	0.955075	1.49324	PG(16:1(9Z)/14:0)-PAMDB001451	PG(16:1(9Z)/14:0)-PAMDB001451 [ C36 H69 O10 P, tgt=32.40, overall=32.40 ]			(694.48114, 2872.3298)(695.484, 907.22)(694.4801, 112.36)(699.5013, 2912.59)(680.4673, 26489.9)(681.46985, 9112.105)(710.59375, 9198.607)(712.4913, 297.68)
Palmiticacid-PAMDB000091	0.309604	0.105292	-0.105292	0.478108	0.235332	0.481364	-0.931094	0.1853	-1.04197	-0.136395	-24.7547	-24.6377	Palmiticacid-PAMDB000091	Palmiticacid-PAMDB000091 [ C16 H32 O2, tgt=86.32, overall=86.32 ]			(239.23183, 1157.7214)(279.22736, 1053435.8)(280.23065, 177087.17)(281.23422, 12487.436)(261.21674, 157060.47)(262.2192, 21958.373)
PE(14:0/18:1(9Z))-PAMDB006221	-2.27837	-1.12275	1.72389	2.81196	1.07598	-21.0459	2.76707	2.70729	0.91389	-20.3017	-20.4499	-0.91389	PE(14:0/18:1(9Z))-PAMDB006221	PE(14:0/18:1(9Z))-PAMDB006221 [ C37 H72 N O8 P, tgt=52.49, overall=52.49 ]			(689.98596, 6708.81)(690.4833, 2250.19)(675.8234, 9314.354)(677.504, 3160.8252)(690.493, 145.3)(674.5031, 13143.329)(675.675, 3969.332)(676.67834, 9102.69)(677.3168, 2645.5479)(677.51886, 11326.82)(678.52106, 3098.8867)(709.53357, 18325.473)(712.03796, 12052.402)(713.05, 17268.67)(712.5439, 3806.4)(713.5567, 14878.42)(694.5498, 2149.36)(716.0067, 5874.689)(717.51166, 2246.5017)(718.5253, 2381.746…
PE(14:0(3-OH)/15:0cyclo)-PAMDB003872	0.96989	0.408732	-0.503484	-7.5462	-0.108088	0.108088	-0.254962	-0.34072	-0.568408	0.344041	0.620467	0.91237	PE(14:0(3-OH)/15:0cyclo)-PAMDB003872	PE(14:0(3-OH)/15:0cyclo)-PAMDB003872 [ C34 H66 N O9 P, tgt=65.65, overall=65.65 ]			(663.4424, 1465290.9)(664.44653, 713105.25)(665.4493, 148740.23)(666.45087, 13995.807)(647.4452, 1678.61)(648.4483, 372.98)(647.4541, 16276.085)(648.4485, 11527.98)(681.47015, 7294.726)(686.42596, 18924.63)(687.42773, 2514.4688)
1-Amino-propan-2-one-3-phosphate-PAMDB000559	15.6991	19.7382	18.7926	-0.74287	-1.01651	16.6074	-0.894499	-0.828812	17.3364	0.0156441	-0.132612	-0.0156441	1-Amino-propan-2-one-3-phosphate-PAMDB000559	1-Amino-propan-2-one-3-phosphate-PAMDB000559 [ C3 H8 N O5 P, tgt=47.42, overall=47.42 ]			(173.0217, 3922.7449)(157.02121, 94268.98)(189.048, 943.4)(169.0324, 42038.75)(170.0348, 1217.08)(177.0033, 8589.62)
DG(10:0/18:0/0:0)-PAMDB003637	-1.41117	-2.4348	0.0582428	-23.431	1.63198	-0.0582428	0.508856	0.12331	-0.129759	3.34768	0.642914	-1.08233	DG(10:0/18:0/0:0)-PAMDB003637	DG(10:0/18:0/0:0)-PAMDB003637 [ C31 H60 O5, tgt=45.39, overall=45.39 ]			(494.41882, 8531.014)(495.43134, 73688.05)(496.43423, 17552.883)(497.43658, 2293.38)(534.6793, 17371.271)(535.7049, 5836.862)(536.4906, 1760.7125)(535.4336, 1021.89)(518.7008, 66688.51)(519.70306, 9137.191)(519.9314, 2226.52)
DG(18:1(9Z)/15:0/0:0)-PAMDB003697	0.43595	1.50626	0.0709658	1.31169	-0.0709658	-0.584905	0.977351	-0.30107	0.984223	-20.3269	-20.4752	-2.3566	DG(18:1(9Z)/15:0/0:0)-PAMDB003697	DG(18:1(9Z)/15:0/0:0)-PAMDB003697 [ C36 H68 O5, tgt=54.87, overall=54.87 ]			(563.49097, 3828.8657)(565.5071, 10906.234)(566.5089, 3305.92)(604.51636, 2258.4668)(564.5221, 1957.71)(582.5135, 4578.38)(587.9288, 39369.79)(587.4952, 15057.898)(588.49677, 1683.4349)(580.5247, 7599.29)
PE(15:0/18:1(9Z))-PAMDB006226	0.739263	0.121028	0.126719	1.85193	-0.121028	-0.160155	-2.01349	-1.6871	-0.156909	-0.763692	0.497434	0.320834	PE(15:0/18:1(9Z))-PAMDB006226	PE(15:0/18:1(9Z))-PAMDB006226 [ C38 H74 N O8 P, tgt=78.91, overall=78.91 ]			(705.4061, 8891.826)(705.5334, 2825.9402)(685.52344, 1914.39)(686.5255, 1397.51)(706.5249, 5771.09)(689.5399, 4768.19)(703.5377, 52381.414)(704.5398, 16941.92)(708.49927, 121000.734)(709.50195, 47148.008)(710.504, 7441.666)
L-Histidinal-PAMDB001944	0.561513	-0.317513	0.0288305	-0.0288305	-0.291642	-0.33224	0.525191	0.197036	-0.467763	0.292659	-1.40402	0.263822	L-Histidinal-PAMDB001944	L-Histidinal-PAMDB001944 [ C6 H10 N3 O, tgt=76.92, overall=76.92 ]			(144.0991, 29086.66)(123.07791, 67946.93)(124.08247, 5376.079)(158.1146, 34748.86)(159.1177, 474.26)
PE(18:1(9Z)/16:1(9Z))-PAMDB006242	1.5334	-0.224635	-1.83074	-19.3594	4.37516	-19.3451	-19.511	-0.882234	0.224635	5.07224	1.82266	3.73239	PE(18:1(9Z)/16:1(9Z))-PAMDB006242	PE(18:1(9Z)/16:1(9Z))-PAMDB006242 [ C39 H74 N O8 P, tgt=64.14, overall=64.14 ]			(718.5207, 5702.0566)(719.02576, 3469.81)(720.0226, 3380.645)(721.5189, 941.68)(703.5142, 57.67)(717.8532, 7102.6035)(719.5156, 4751.25)(721.5176, 1366.35)(700.2628, 2930.8477)(700.8481, 5851.3535)(701.85504, 13932.993)(702.861, 7247.9766)(703.86884, 18809.244)(704.53625, 9225.59)(735.5534, 8023.929)(736.8048, 2372.0176)(743.42004, 26596.29)(743.5256, 2651.31)(744.5384, 4914.14)(721.4923, 9818.51…
PS(14:0/18:1(9Z))-PAMDB006259	20.2292	20.886	-1.17563	20.3332	20.4392	-0.670048	-0.836014	-0.770327	-0.757042	0.0741291	-0.0741272	17.0429	PS(14:0/18:1(9Z))-PAMDB006259	PS(14:0/18:1(9Z))-PAMDB006259 [ C38 H72 N O10 P, tgt=18.40, overall=18.40 ]			(738.4876, 1356.9)(740.5058, 169.37)(717.3094, 19506.035)(718.3118, 5972.5737)(718.5132, 167.02)(733.5253, 5479.84)
D-Glucose-PAMDB000045	-0.00323677	2.45831	1.18019	0.200661	-19.6332	-0.349163	-1.30865	-0.313826	0.00323677	-0.229916	2.15466	0.133585	D-Glucose-PAMDB000045	D-Glucose-PAMDB000045 [ C6 H12 O6, tgt=53.01, overall=53.01 ]			(180.15381, 46548.36)(181.26663, 4698.748)(185.0746, 18681.15)(162.0514, 4337.51)(183.0983, 772.99)(208.06924, 4089.6802)
78-Diaminononanoate-PAMDB000957	0.578695	-0.0794544	0.110214	0.689684	0.117167	0.369751	-1.45033	-0.340319	-1.08262	-0.273855	0.059515	-0.059515	78-Diaminononanoate-PAMDB000957	78-Diaminononanoate-PAMDB000957 [ C9 H19 N2 O2, tgt=65.21, overall=65.21 ]			(187.14111, 455490.0)(188.14378, 32734.588)(189.14536, 1287.02)
Histidinyl-Asparagine_BMDB62238	-8.82672	8.23939	7.9057	-8.66421	-8.93785	7.96315	-8.81584	8.64055	8.72936	-7.9057	9.67253	-7.93699	Histidinyl-Asparagine_BMDB62238	Histidinyl-Asparagine_BMDB62238 [ C10H15N5O4, tgt= ]			(292.09674, 2851.445)(274.0866, 9284.073)
PE(15:0cyclo/16:0)-PAMDB006671	-0.483542	-0.801514	-0.441837	0.0284328	-0.260174	-0.0619488	0.428246	0.276957	0.523794	0.728914	-0.0284328	0.213163	PE(15:0cyclo/16:0)-PAMDB006671	PE(15:0cyclo/16:0)-PAMDB006671 [ C36 H70 N O8 P, tgt=68.87, overall=68.87 ]			(676.4862, 20623.46)(677.4929, 6930.526)(678.4941, 3824.8767)(658.4963, 9718.027)(699.5246, 1366.3)(675.50616, 43419.336)(676.51013, 13335.505)(680.46783, 15523.678)(681.4703, 5109.992)
2-Octaprenyl-6-methoxy-14-benzoquinol-PAMDB001567	-1.23302	-0.672264	0.672264	3.29412	-20.8825	-20.5945	1.83902	1.90145	1.68584	5.39676	-19.9986	-19.8817	2-Octaprenyl-6-methoxy-14-benzoquinol-PAMDB001567	2-Octaprenyl-6-methoxy-14-benzoquinol-PAMDB001567 [ C47 H72 O3, tgt=59.31, overall=59.31 ]			(685.5447, 119091.586)(686.5474, 43334.656)(689.5526, 80617.58)(690.5565, 20977.11)(670.5526, 30541.344)(671.553, 9155.998)(672.5615, 3845.5076)(687.9455, 188946.08)(688.94824, 69478.516)(689.5515, 29841.457)(690.5563, 5130.9453)(668.568, 13521.26)(669.5708, 4195.13)(706.92035, 74280.91)(708.39777, 109027.89)(708.6005, 320935.6)(711.87897, 22956.42)(713.55615, 98532.06)
CDP-DG(12:0/10:0)-PAMDB003721	0.00378513	-0.0731688	-0.00378513	-1.11572	-0.825328	-1.28811	1.29023	-1.02395	1.36457	2.41273	0.247964	1.59346	CDP-DG(12:0/10:0)-PAMDB003721	CDP-DG(12:0/10:0)-PAMDB003721 [ C34 H61 N3 O15 P2, tgt=47.28, overall=47.28 ]			(795.34186, 26608.979)(796.3443, 7699.103)(797.3477, 1418.8934)(839.35596, 1004.05)
Methylmalonylcarnitine_BMDB62650	0.192013	-0.284332	-0.614197	-0.0641918	-0.183054	0.0641918	-0.168461	0.1056	-0.232004	1.27326	0.252464	1.15236	Methylmalonylcarnitine_BMDB62650	Methylmalonylcarnitine_BMDB62650 [ C11 H19 N O6, tgt=98.38, overall=98.38 ]			(263.12216, 504.47665)(279.15454, 355249.66)(280.15732, 45204.23)(281.15942, 2600.915)
PGP(14:0(3-OH)/12:0)-PAMDB006567	0.00574875	0.125877	-0.442305	-0.132301	-0.00574875	-0.0215034	-0.0187798	-0.259329	0.214787	0.775621	0.396156	0.444876	PGP(14:0(3-OH)/12:0)-PAMDB006567	PGP(14:0(3-OH)/12:0)-PAMDB006567 [ C32 H64 O14 P2, tgt=42.86, overall=42.86 ]			(716.3757, 22197.717)(717.3784, 6050.2173)(718.3871, 1846.1788)
DG(12:0/18:1(9Z)/0:0)-PAMDB003647	2.44244	3.94519	-0.00271988	0.396084	2.80842	-22.6297	0.329378	-0.0246811	0.00271988	-21.8856	-22.0338	-21.9169	DG(12:0/18:1(9Z)/0:0)-PAMDB003647	DG(12:0/18:1(9Z)/0:0)-PAMDB003647 [ C33 H62 O5, tgt=51.88, overall=51.88 ]			(521.44574, 32789.2)(522.5953, 11966.198)(523.6059, 281388.94)(524.46576, 94743.79)(525.4678, 10648.46)(560.99774, 34082.01)(561.4998, 54565.965)(538.4795, 16152.37)(561.4629, 445.1)(543.5609, 52618.867)(544.64355, 15427.901)(545.6474, 1120.224)(547.459, 5154.6)
DG(10:0/14:0/0:0)-PAMDB003633	-24.7253	0.340744	0.0229645	-24.5628	-0.0229645	0.993431	0.844158	0.697372	-0.728086	-23.8043	0.276978	-2.90501	DG(10:0/14:0/0:0)-PAMDB003633	DG(10:0/14:0/0:0)-PAMDB003633 [ C27H52O5, tgt= ]			(438.35776, 25755.566)(439.37024, 309537.38)(440.3734, 82465.71)(441.37546, 8168.132)(464.0378, 8303.201)(465.25726, 80497.81)(466.1015, 44950.246)(466.3883, 18752.285)
DG(16:1(9Z)/19:1(9Z)/0:0)-PAMDB003684	-0.526121	21.1834	-0.85486	-0.363613	-0.637253	19.0354	21.6374	-0.449554	-0.43627	20.781	18.9143	0.363613	DG(16:1(9Z)/19:1(9Z)/0:0)-PAMDB003684	DG(16:1(9Z)/19:1(9Z)/0:0)-PAMDB003684 [ C38H70O5, tgt= ]			(590.76526, 3634.715)(591.5223, 2709.22)(613.51605, 54516.02)(614.51855, 15647.3545)(615.52576, 6234.0225)(615.5256, 4791.99)(616.5288, 264.99)
PG(12:0(3-OH)/12:0)-PAMDB004041	19.0301	19.4104	18.6038	-0.312298	-0.585938	-0.29796	-0.463926	-0.398239	-0.384954	0.446217	0.29796	0.414928	PG(12:0(3-OH)/12:0)-PAMDB004041	PG(12:0(3-OH)/12:0)-PAMDB004041 [ C30 H59 O11 P, tgt=39.06, overall=39.06 ]			(644.42865, 4355.4)(626.4005, 12244.133)(627.4037, 495.695)(651.3652, 177.45)
Creatine_BMDB00064	-0.503522	0.226426	-0.421426	-0.495738	-0.898475	0.0258875	-0.198424	-0.0258875	0.0999289	0.378268	1.86765	1.16954	Creatine_BMDB00064	Creatine_BMDB00064 [ C4 H9 N3 O2, tgt=64.72, overall=64.72 ]			(115.73391, 3724.702)(116.0679, 9037.29)(132.0745, 416275.34)(133.077, 12586.0)(134.07849, 647.755)(114.064095, 37886.984)(115.066925, 1012.1575)(137.88489, 31729.318)(139.05516, 4265.33)
DG(19:iso/12:0/0:0)-PAMDB006947	-0.17334	-0.647467	0.10918	-22.4331	0.512587	-22.4187	0.604517	0.482235	0.737989	0.648199	-21.8228	-0.10918	DG(19:iso/12:0/0:0)-PAMDB006947	DG(19:iso/12:0/0:0)-PAMDB006947 [ C34 H66 O5, tgt=38.91, overall=38.91 ]			(560.4917, 9887.47)(536.77356, 9512.443)(537.4958, 15556.68)(538.5, 1154.36)(561.505, 3919.11)(537.477, 31336.234)(538.48047, 9161.668)(577.4933, 12653.38)(578.4958, 370.78)(559.6863, 16320.871)(560.7129, 6448.615)(561.60736, 919.5829)
PE(17:0cycw7c/19:iso)-PAMDB003902	1.04047	-0.0517855	-19.3575	2.91319	-19.1399	2.44374	0.0517855	0.594821	1.68628	-18.1078	-18.256	-0.353911	PE(17:0cycw7c/19:iso)-PAMDB003902	PE(17:0cycw7c/19:iso)-PAMDB003902 [ C41 H80 N O8 P, tgt=67.53, overall=67.53 ]			(729.56146, 2830.2083)(730.5794, 6882.9604)(731.7709, 9812.174)(732.77185, 3027.182)(733.775, 5994.422)(734.55927, 10877.85)(766.603, 17587.688)(764.59283, 13102.83)(765.5956, 2043.81)(746.55444, 8258.693)(747.5569, 1428.0549)
spiruchostatinB-PAMDB100001	-0.121734	-0.599236	-0.550849	0.0971861	0.0488024	-18.9697	0.65928	-19.07	0.32706	1.90605	-0.0488024	1.10579	spiruchostatinB-PAMDB100001	spiruchostatinB-PAMDB100001 [ C21 H33 N3 O6 S2, tgt=39.73, overall=39.73 ]			(505.21143, 16097.339)(506.2146, 2515.441)
PG(15:0/17:0cycw7c)-PAMDB002031	0.420682	1.432	1.03471	-20.4867	0.58962	-0.331593	0.905972	0.0415544	-0.0415544	-19.7282	-19.8764	-19.7595	PG(15:0/17:0cycw7c)-PAMDB002031	PG(15:0/17:0cycw7c)-PAMDB002031 [ C39 H75 O10 P, tgt=24.22, overall=24.22 ]			(716.508, 18227.871)(717.5109, 6235.534)(718.5132, 90.75)(722.54034, 749.7967)(758.55676, 14825.3955)(735.5453, 553.815)(737.5546, 1555.65)(740.50726, 5997.25)(741.51, 1267.1799)
PG(19:0cycv8c/12:0(3-OH))-PAMDB004100	-18.3893	0.978498	0.279579	-18.2268	0.447626	-18.2124	-0.0324745	-18.3127	-0.0208435	0.0208435	2.01193	2.27475	PG(19:0cycv8c/12:0(3-OH))-PAMDB004100	PG(19:0cycv8c/12:0(3-OH))-PAMDB004100 [ C37H71O11P, tgt= ]			(710.5056, 12672.59)(740.8437, 9775.251)(741.5098, 2281.21)(722.4947, 11281.624)(723.495, 3279.91)(731.4679, 2540.3525)(732.4699, 1166.96)
N-(2-Oxohexanoyl)homoserine lactone_BMDB62197	0.362299	-0.164633	-0.506151	-0.187864	-0.0859337	0.0859337	-19.5909	-0.926622	0.161287	0.978579	0.209852	0.936016	N-(2-Oxohexanoyl)homoserine lactone_BMDB62197	N-(2-Oxohexanoyl)homoserine lactone_BMDB62197 [ C10 H15 N O4, tgt=63.16, overall=63.16 ]			(214.1035, 6968.239)(217.1141, 738.63)(196.09059, 46768.26)(197.09326, 1701.79)(231.12976, 32632.13)(232.13274, 1693.5967)
Leu-Arg-Asn-Arg_BMDB62562	16.7292	15.2524	15.8036	16.4069	-1.01651	15.6148	-0.894499	-0.828812	-0.815527	0.0156441	-0.132612	-0.0156441	Leu-Arg-Asn-Arg_BMDB62562	Leu-Arg-Asn-Arg_BMDB62562 [ C22 H43 N11 O6, tgt=31.13, overall=31.13 ]			(578.36633, 30561.537)(579.3688, 6801.168)
PE(18:1(9Z)/15:0)-PAMDB006240	0.739263	0.121028	0.126719	1.85193	-0.121028	-0.160155	-2.01349	-1.6871	-0.156909	-0.763692	0.497434	0.320834	PE(18:1(9Z)/15:0)-PAMDB006240	PE(18:1(9Z)/15:0)-PAMDB006240 [ C38 H74 N O8 P, tgt=78.91, overall=78.91 ]			(705.4061, 8891.826)(705.5334, 2825.9402)(685.52344, 1914.39)(686.5255, 1397.51)(706.5249, 5771.09)(689.5399, 4768.19)(703.5377, 52381.414)(704.5398, 16941.92)(708.49927, 121000.734)(709.50195, 47148.008)(710.504, 7441.666)
PS(18:0/20:0)-PAMDB006247	0.455561	0.589937	0.307611	-16.684	-0.327068	-0.151144	0.673075	-16.7699	0.151144	1.50141	-16.0737	-15.9568	PS(18:0/20:0)-PAMDB006247	PS(18:0/20:0)-PAMDB006247 [ C44 H86 N O10 P, tgt=19.03, overall=19.03 ]			(823.58875, 23422.965)(824.5916, 9363.548)(824.5885, 6253.26)
Dihydrofolicacid-PAMDB000235	1.57738	0.381079	1.71409	-0.427248	-0.382339	-0.804338	0.0460167	-0.0511379	0.240013	1.09276	-0.0460167	-16.67	Dihydrofolicacid-PAMDB000235	Dihydrofolicacid-PAMDB000235 [ C19 H19 N7 O6, tgt=44.80, overall=44.80 ]			(441.1325, 9376.09)(442.1289, 670.75)(423.1329, 4650.04)(425.14856, 189182.31)(426.15225, 34159.957)(427.154, 2593.63)
Isobutyrylcarnitine_BMDB62101	0.224575	-0.171577	-0.0797615	-0.0366478	-0.213242	0.0366478	0.246897	-0.351938	-0.164896	0.886448	0.498167	0.98085	Isobutyrylcarnitine_BMDB62101	Isobutyrylcarnitine_BMDB62101 [ C11 H22 N O4, tgt=94.59, overall=94.59 ]			(236.17097, 37166.008)(236.17168, 41271.887)(237.1746, 2840.79)(216.15575, 63278.2)(217.1584, 4611.351)(256.65027, 1785.9116)(258.15256, 3707.3948)(237.80473, 104832.62)(239.1399, 11702.054)(240.14334, 656.45)
PGP(17:0cycw7c/19:0cycv8c)-PAMDB006621	0.237823	0.340763	0.396202	-17.1097	-0.816591	-17.0953	0.375364	-17.1956	-0.237823	1.77293	2.29083	-16.3824	PGP(17:0cycw7c/19:0cycv8c)-PAMDB006621	PGP(17:0cycw7c/19:0cycv8c)-PAMDB006621 [ C42 H80 O13 P2, tgt=14.27, overall=14.27 ]			(854.4841, 8967.083)(855.4868, 2426.9355)(859.4902, 22499.19)(860.4927, 9433.03)
Lys-Asp-Tyr_BMDB62566	0.299187	0.173679	0.0331879	-0.067831	-0.0331879	-0.354202	0.519327	-19.6902	0.442064	1.59165	-18.994	-18.877	Lys-Asp-Tyr_BMDB62566	Lys-Asp-Tyr_BMDB62566 [ C19 H28 N4 O7, tgt=31.55, overall=31.55 ]			(430.21152, 1215.9933)(425.21884, 1998.7632)(447.39835, 26061.814)(448.20026, 4135.415)(429.1818, 10386.966)(430.18607, 1351.9917)
Butyrylcarnitine_BMDB02013	0.154108	3.33837	2.0275	0.00544357	-0.526747	-0.434916	-20.2883	-0.00544357	0.328871	-2.02764	2.2437	-0.366035	Butyrylcarnitine_BMDB02013	Butyrylcarnitine_BMDB02013 [ C11 H21 N O4, tgt=68.47, overall=68.47 ]			(232.15028, 107949.96)(233.44014, 10172.897)(234.1546, 679.04)(215.1433, 18177.578)(215.14255, 1024.3474)(250.1859, 2368.09)(235.1804, 4174.28)(257.1426, 7864.22)(258.1452, 364.6)(236.12132, 39593.016)(237.1244, 2522.5825)
DG(10:0(3-OH)/12:0/0:0)-PAMDB006858	2.19089	1.06815	0.501209	0.376354	0.244299	-0.106964	-19.7362	-0.868938	-19.6572	-0.624733	-0.24164	0.106964	DG(10:0(3-OH)/12:0/0:0)-PAMDB006858	DG(10:0(3-OH)/12:0/0:0)-PAMDB006858 [ C25 H48 O6, tgt=72.90, overall=72.90 ]			(430.3561, 2513.39)(446.35153, 31842.682)(447.35446, 5359.525)(465.38434, 33761.863)(466.38712, 7741.7705)(467.40045, 110003.836)(468.40317, 25476.773)(446.3508, 42675.82)(447.3538, 8096.65)(451.3299, 2951.312)(452.3326, 114.06)(445.11923, 5845.5874)(446.56723, 910.9181)
PS(12:0/10:0(3-OH))-PAMDB003957	16.1702	16.0226	-0.803545	-0.312298	-0.585938	-0.29796	16.468	-0.398239	-0.384954	17.3862	0.29796	0.414928	PS(12:0/10:0(3-OH))-PAMDB003957	PS(12:0/10:0(3-OH))-PAMDB003957 [ C28 H52 N O11 P, tgt=16.02, overall=16.02 ]			(633.838, 6322.415)(634.3408, 925.92)(635.33636, 1269.0033)(597.3266, 383.68)
12-Dioctadecanoyl-sn-glycerol-PAMDB001861	-5.08954	-1.4381	0.0266142	1.30393	-1.32639	0.887528	-0.0198622	0.386582	0.0198622	1.57037	-4.48186	-4.42892	12-Dioctadecanoyl-sn-glycerol-PAMDB001861	12-Dioctadecanoyl-sn-glycerol-PAMDB001861 [ C39 H76 O5, tgt=64.67, overall=64.67 ]			(625.5741, 17663.4)(626.5766, 5736.85)(606.5416, 3186.93)(629.54376, 307332.1)(630.54565, 50170.547)(631.5469, 5498.4604)
L-Arabinose-PAMDB000164	1.01959	-0.138322	0.138322	0.821942	-0.227948	0.811507	-2.05953	-19.3903	-19.377	0.767663	-18.6941	1.00096	L-Arabinose-PAMDB000164	L-Arabinose-PAMDB000164 [ C5 H10 O5, tgt=85.54, overall=85.54 ]			(150.05222, 35236.91)(151.05498, 1029.3116)(136.05893, 1751.1517)(156.039, 9080.61)
7Z-tetradecenoic acid_BMDB62587	0.221112	-0.0899496	-0.359456	0.186137	-0.0421095	0.171271	-0.42822	-0.10632	-0.487468	0.455951	0.0421095	0.520986	7Z-tetradecenoic acid_BMDB62587	7Z-tetradecenoic acid_BMDB62587 [ C14 H26 O2, tgt=82.20, overall=82.20 ]			(209.18584, 4946.0977)(212.19685, 29168.814)(213.19978, 1420.5989)(247.23799, 397644.4)(248.24089, 61228.715)(249.24359, 1560.4259)(226.21222, 37381.887)(227.21509, 2734.0833)(228.22725, 357.99667)
PGP(12:0(3-OH)/14:0)-PAMDB006551	0.00574875	0.125877	-0.442305	-0.132301	-0.00574875	-0.0215034	-0.0187798	-0.259329	0.214787	0.775621	0.396156	0.444876	PGP(12:0(3-OH)/14:0)-PAMDB006551	PGP(12:0(3-OH)/14:0)-PAMDB006551 [ C32 H64 O14 P2, tgt=42.86, overall=42.86 ]			(716.3757, 22197.717)(717.3784, 6050.2173)(718.3871, 1846.1788)
DG(19:1(9Z)/15:0/0:0)-PAMDB003706	0.541729	0.0660953	-0.32855	-0.0319977	0.0319977	0.125782	-20.5274	0.125782	-20.4484	0.564198	-19.7655	-0.174486	DG(19:1(9Z)/15:0/0:0)-PAMDB003706	DG(19:1(9Z)/15:0/0:0)-PAMDB003706 [ C37 H70 O5, tgt=86.88, overall=86.88 ]			(595.5277, 3053.7446)(578.30383, 1318.0701)(617.51105, 60465.168)(618.51355, 17875.205)(619.5129, 1998.7067)(601.00995, 15267.578)(601.5102, 4220.9062)(603.52246, 593.6367)
Glucosamine-1P-PAMDB000256	-0.0987444	2.57205	1.82574	-16.5367	-16.8104	0.0987444	-0.234799	1.46526	1.87123	-15.7782	1.31007	-15.8095	Glucosamine-1P-PAMDB000256	Glucosamine-1P-PAMDB000256 [ C6 H14 N O8 P, tgt=83.67, overall=83.67 ]			(247.0521, 939.12)(280.0869, 49680.54)(281.0895, 3096.8674)(260.0482, 9517.37)
2-Oxo-4-methylthiobutanoic acid_BMDB01553	0.180507	-0.373054	-0.552783	-0.0336542	-25.5914	0.0336542	-0.277396	0.248607	-0.315404	1.15344	0.259204	1.12247	2-Oxo-4-methylthiobutanoic acid_BMDB01553	2-Oxo-4-methylthiobutanoic acid_BMDB01553 [ C5 H8 O3 S, tgt=44.99, overall=44.99 ]			(149.02109, 1388220.4)(151.02534, 5178.4976)(175.01227, 708.8775)
PE(19:iso/12:0(3-OH))-PAMDB003914	0.235799	-0.126658	-0.489991	0.0582933	-0.0475607	-0.0469294	-0.187825	-0.451467	0.0469294	0.813626	0.879359	1.07755	PE(19:iso/12:0(3-OH))-PAMDB003914	PE(19:iso/12:0(3-OH))-PAMDB003914 [ C36 H72 N O9 P, tgt=40.78, overall=40.78 ]			(676.4866, 24043.521)(677.49603, 8283.547)(678.4972, 3066.845)(713.5542, 15276.547)(714.55664, 4631.048)(720.6811, 9633.075)(721.5146, 2434.0923)
2-3-bis[(3R)-3-hydroxymyristoyl]-&alpha-D-glucosaminyl1-phosphate-PAMDB006334	-0.126179	17.5797	-0.454918	0.0363293	-0.23731	0.0506668	-0.115299	-0.049612	-0.0363274	0.794844	0.646587	0.763556	2-3-bis[(3R)-3-hydroxymyristoyl]-&alpha-D-glucosaminyl1-phosphate-PAMDB006334	2-3-bis[(3R)-3-hydroxymyristoyl]-&alpha-D-glucosaminyl1-phosphate-PAMDB006334 [ C34 H66 N O12 P, tgt= ]			(717.4419, 8775.81)(731.4671, 18726.79)(732.4697, 7235.99)
Folic acid_BMDB00121	1.57738	0.381079	1.71409	-0.427248	-0.382339	-0.804338	0.0460167	-0.0511379	0.240013	1.09276	-0.0460167	-16.67	Folic acid_BMDB00121	Folic acid_BMDB00121 [ C19 H19 N7 O6, tgt=44.80, overall=44.80 ]			(441.1325, 9376.09)(442.1289, 670.75)(423.1329, 4650.04)(425.14856, 189182.31)(426.15225, 34159.957)(427.154, 2593.63)
2-Acyl-sn-glycero-3-phosphoethanolamine(N-C14:1)-PAMDB001550	-0.533291	16.6534	-0.86203	17.7884	18.0771	-0.356445	-0.522411	-0.456724	-0.443439	0.387732	18.4108	0.356443	2-Acyl-sn-glycero-3-phosphoethanolamine(N-C14:1)-PAMDB001550	2-Acyl-sn-glycero-3-phosphoethanolamine(N-C14:1)-PAMDB001550 [ C19H35NO7P, tgt= ]			(402.2038, 15279.09)(403.2067, 788.99)(420.22913, 22088.955)(421.23175, 3443.0352)
Histidinyl-Valine_BMDB62242	0.310549	1.20952	0.0975418	-21.3101	1.13221	-21.2958	0.66363	-1.25479	-0.0975418	1.2836	-20.6999	-20.5829	Histidinyl-Valine_BMDB62242	Histidinyl-Valine_BMDB62242 [ C11 H18 N4 O3, tgt=49.58, overall=49.58 ]			(256.14954, 1474.285)(258.15286, 3440.92)(238.13686, 166179.94)(239.13972, 13414.605)(240.14334, 702.64)(260.1562, 2097.54)(237.14081, 14035.7)(254.16826, 17820.111)(255.17075, 742.584)(277.13516, 30428.86)(278.1402, 3611.2202)
PS(17:0/14:0)-PAMDB001458	2.21965	0.114093	-0.00625706	-0.51747	-1.2925	0.00625706	-0.77422	-0.658393	-0.872119	0.744126	0.0367098	0.682336	PS(17:0/14:0)-PAMDB001458	PS(17:0/14:0)-PAMDB001458 [ C37 H72 N O10 P, tgt=96.38, overall=96.38 ]			(721.99194, 14192.987)(722.99615, 4160.909)(723.5023, 952.57)(708.49884, 170094.36)(709.50165, 67099.81)(710.5036, 11058.983)(743.43994, 21651.373)(744.53394, 6849.307)
L-D-1-Pyrroline-5-carboxylicacid-PAMDB000329	8.6681	8.59543	8.0046	8.71535	8.64251	8.61175	-8.91475	-8.84906	-8.83577	-8.0046	-8.15286	-8.03589	L-D-1-Pyrroline-5-carboxylicacid-PAMDB000329	L-D-1-Pyrroline-5-carboxylicacid-PAMDB000329 [ C5 H7 N O2, tgt=47.17, overall=47.17 ]			(115.051796, 5085.533)(131.08243, 7916.4434)
2-(Formamido)-N(1)-(5-phospho-D-ribosyl)acetamidine-PAMDB003416	0.0488939	2.3602	1.64548	-0.843413	-1.7616	0.61848	-0.0488939	1.34017	1.43248	-19.3693	-19.5176	-19.4006	2-(Formamido)-N(1)-(5-phospho-D-ribosyl)acetamidine-PAMDB003416	2-(Formamido)-N(1)-(5-phospho-D-ribosyl)acetamidine-PAMDB003416 [ C8 H16 N3 O8 P, tgt=79.85, overall=79.85 ]			(296.06097, 445823.5)(297.06345, 27517.191)(298.0594, 23462.115)(299.0618, 804.15)(321.0512, 399.495)
L-Histidinol-PAMDB000502	0.807278	-0.149973	-0.0396786	0.0396786	-0.0871811	-0.196108	0.520586	0.423658	-0.323046	0.325396	-20.0444	0.104063	L-Histidinol-PAMDB000502	L-Histidinol-PAMDB000502 [ C6 H11 N3 O, tgt=76.64, overall=76.64 ]			(123.07791, 72575.7)(124.08247, 5855.7114)
13-Methylmyristic acid_BMDB62058	-22.0047	5.94874	-22.3334	-21.8422	-22.1158	-21.8278	5.04495	-5.04304	5.04304	6.15573	5.91153	6.16814	13-Methylmyristic acid_BMDB62058	13-Methylmyristic acid_BMDB62058 [ C15H30O2, tgt= ]			(267.2156, 115.61)(228.22845, 7897682.5)(229.2312, 1499636.6)(230.2349, 214235.23)(247.2355, 447.28003)(247.2011, 6296.74)(242.24432, 3671929.0)(243.24756, 568778.75)(244.24977, 32178.22)
Ureidosuccinic acid_BMDB00828	0.192569	2.37482	1.24226	0.684541	-17.4224	-0.0531721	-17.3004	-0.0801573	0.0531721	-16.3903	-16.5385	0.601169	Ureidosuccinic acid_BMDB00828	Ureidosuccinic acid_BMDB00828 [ C5 H8 N2 O5, tgt=46.79, overall=46.79 ]			(194.0775, 14798.907)(195.0817, 3037.0)(177.0675, 6187.3896)
PS(12:0/19:iso)-PAMDB003960	2.15649	1.04468	0.373158	0.270677	-0.508475	-0.479127	-0.157125	-0.599015	0.157125	-18.0883	1.77085	-18.1196	PS(12:0/19:iso)-PAMDB003960	PS(12:0/19:iso)-PAMDB003960 [ C37 H70 N O10 P, tgt=60.83, overall=60.83 ]			(721.4922, 28673.21)(722.4981, 14008.52)(723.5023, 849.99)(708.49817, 148782.19)(742.52216, 9051.515)(743.52423, 1025.62)(720.8406, 8777.412)(721.884, 1538.8475)(725.4663, 767.405)
1-Acyl-sn-glycero-3-phosphoethanolamine(N-C16:1)-PAMDB001526	-0.447345	-0.671756	-1.10037	-0.555852	-0.764073	-0.296817	0.346574	0.495885	0.296817	1.00424	0.602864	1.16608	1-Acyl-sn-glycero-3-phosphoethanolamine(N-C16:1)-PAMDB001526	1-Acyl-sn-glycero-3-phosphoethanolamine(N-C16:1)-PAMDB001526 [ C21 H39 N O7 P, tgt=92.08, overall=92.08 ]			(430.23636, 705728.2)(431.23926, 142756.17)(432.24072, 15528.599)(433.2435, 635.72)(471.2974, 8974.696)
Heptadecenoicacid-PAMDB001933	0.263473	0.0517702	-0.206351	0.414559	0.221183	0.447019	-1.05185	-0.0517702	-1.16733	-0.189544	-0.19604	0.172925	Heptadecenoicacid-PAMDB001933	Heptadecenoicacid-PAMDB001933 [ C17 H32 O2, tgt=82.32, overall=82.32 ]			(251.2326, 146877.42)(252.23497, 20315.803)(294.23788, 241067.7)(295.2405, 37312.05)(296.25262, 6449375.0)(276.22656, 2927.3826)(278.24194, 30331.344)
PG(12:0/19:iso)-PAMDB004056	2.05312	0.613619	-23.748	0.40502	0.158459	-0.158459	-0.603779	-0.512297	-0.560699	-22.4983	1.8098	1.63563	PG(12:0/19:iso)-PAMDB004056	PG(12:0/19:iso)-PAMDB004056 [ C37 H73 O10 P, tgt=48.96, overall=48.96 ]			(694.481, 2599.76)(695.484, 804.79)(729.4028, 5643.1475)(728.5351, 1099.59)(729.5462, 5266.34)(709.01166, 86380.586)(710.0143, 33554.082)(710.5038, 9640.376)(731.4689, 7569.12)(732.4718, 1519.734)
3-Oxo-N-(2-oxotetrahydro-3-furanyl)dodecanamide-PAMDB100079	0.311388	0.0243034	0.253304	-0.198709	-0.0243034	-0.0877552	0.582312	-0.584934	0.232351	1.61157	-17.149	-17.032	3-Oxo-N-(2-oxotetrahydro-3-furanyl)dodecanamide-PAMDB100079	3-Oxo-N-(2-oxotetrahydro-3-furanyl)dodecanamide-PAMDB100079 [ C16 H27 N O4, tgt=74.08, overall=74.08 ]			(300.8661, 1454.6466)(302.2029, 1026.29)(318.23444, 99664.15)(319.23703, 12871.542)(320.1832, 14998.122)(321.1868, 311.64)(306.1772, 6517.292)
L-Homoserine-PAMDB000449	-0.254191	-0.255809	-0.384063	0.469695	0.00612164	0.143296	-0.00303364	0.00303364	-0.168256	0.901908	-2.79163	0.742696	L-Homoserine-PAMDB000449	L-Homoserine-PAMDB000449 [ C4 H9 N O3, tgt=64.58, overall=64.58 ]			(121.0624, 322.93)(103.05218, 8519.207)(104.05967, 5757.23)(119.0835, 552784.5)(120.08655, 36794.79)(124.0377, 47870.55)(125.0403, 862.67)
Chitobiose-PAMDB000515	1.06396	-0.112927	-0.315364	-0.446593	-0.357699	-0.217044	0.306003	-0.0999365	0.0999365	1.11091	0.344893	0.74229	Chitobiose-PAMDB000515	Chitobiose-PAMDB000515 [ C15 H26 N2 O12, tgt=50.84, overall=50.84 ]			(426.15118, 22717.914)(427.15146, 946.0801)(409.15515, 209571.23)(410.15775, 35843.98)(411.1599, 2791.8748)
Octadecenoate(N-C18:1)-PAMDB001746	4.29917	-2.21753	-23.1402	4.38596	-1.70497	-1.81129	2.06313	2.69984	-22.7216	3.10922	-22.0387	1.70497	Octadecenoate(N-C18:1)-PAMDB001746	Octadecenoate(N-C18:1)-PAMDB001746 [ C18 H33 O2, tgt=60.66, overall=60.66 ]			(283.75174, 59499.06)(284.5032, 11635.625)(263.23227, 448861.03)(264.23425, 74032.98)(265.23798, 8225.86)(266.243, 227.28)(282.59506, 88036.48)(283.26624, 4064.72)(266.91956, 5742.8965)(269.261, 280.305)(300.28244, 2001.1635)(282.27258, 87929.14)(283.27625, 14490.047)(307.91385, 16226.349)(308.57697, 25146.68)(308.2503, 2383.18)(309.2479, 30286.21)(287.9036, 23660.756)
Guanosine-PAMDB000052	0.0469894	-0.0469894	-0.165737	-0.2201	-0.297253	-0.579884	0.254864	-0.218697	0.33989	1.30371	0.22665	0.817999	Guanosine-PAMDB000052	Guanosine-PAMDB000052 [ C10 H13 N5 O5, tgt=86.01, overall=86.01 ]			(283.11298, 229898.58)(284.1157, 23826.79)(285.1174, 1178.76)
DG(16:1(9Z)/10:0/0:0)-PAMDB003676	1.95719	0.611255	1.51014	1.99448	-24.1413	1.33741	-24.0193	0.0484152	-23.9403	-0.0484152	-23.2574	-23.1404	DG(16:1(9Z)/10:0/0:0)-PAMDB003676	DG(16:1(9Z)/10:0/0:0)-PAMDB003676 [ C29 H54 O5, tgt=63.05, overall=63.05 ]			(483.39175, 169.905)(464.54282, 7307.4126)(466.3882, 8993.28)(467.4012, 59607.23)(468.4041, 13748.55)(484.4002, 4429.9253)(466.3922, 823218.94)(467.3951, 226604.44)(468.39706, 24561.506)(469.39627, 1656.2148)(506.38403, 1672.732)(507.3872, 108.02)(488.8055, 105701.21)(489.37558, 27128.445)(490.37827, 2579.105)
DG(10:0/16:0/0:0)-PAMDB003635	1.94656	-0.0570612	0.00242138	1.98586	1.10804	-0.00242138	-24.2265	-0.0933123	-24.1475	-0.626142	0.00878239	0.0269175	DG(10:0/16:0/0:0)-PAMDB003635	DG(10:0/16:0/0:0)-PAMDB003635 [ C29 H56 O5, tgt=50.11, overall=50.11 ]			(484.3995, 4134.9663)(466.39096, 398421.44)(467.39505, 158832.7)(468.39706, 16669.531)(469.39618, 2325.3398)(467.401, 216944.5)(468.4048, 61902.332)(469.4079, 6116.1196)(507.3872, 110.37)(491.39923, 10773.52)(492.65567, 26691.045)(493.66638, 50125.844)(494.41873, 14238.109)
Vaccenicacid-PAMDB001838	0.673344	0.657192	-0.534178	-0.341509	0.00588226	-0.00588226	-0.446711	-29.1644	-0.447968	0.494982	0.14739	0.612705	Vaccenicacid-PAMDB001838	Vaccenicacid-PAMDB001838 [ C18 H34 O2, tgt=92.28, overall=92.28 ]			(265.2484, 593657.94)(266.2513, 98368.05)(267.25427, 5525.8926)(268.2583, 30389.469)(269.26117, 4040.67)(282.27502, 1.1418404E7)(283.27783, 2470817.2)(284.28143, 241057.31)(285.28415, 11129.535)
2-Acyl-sn-glycero-3-phosphoethanolamine(N-C14:0)-PAMDB001549	-0.449111	-0.686578	-1.10122	-0.546407	-0.760573	-0.29787	0.345361	0.476121	0.29787	1.01376	0.614026	1.16804	2-Acyl-sn-glycero-3-phosphoethanolamine(N-C14:0)-PAMDB001549	2-Acyl-sn-glycero-3-phosphoethanolamine(N-C14:0)-PAMDB001549 [ C19 H40 N O7 P, tgt=74.60, overall=74.60 ]			(427.2715, 8557.595)(428.27405, 1309.6725)(427.2724, 5975.76)(428.2748, 697.6)(430.23636, 701343.44)(431.23926, 141801.67)(432.24072, 15412.882)(433.2435, 598.32)
PG(15:0cyclo/16:0)-PAMDB006498	-2.02	-2.59431	-3.49277	-2.41265	0.00765324	0.386426	1.17784	1.01104	-0.00765324	2.1814	2.41417	-20.5862	PG(15:0cyclo/16:0)-PAMDB006498	PG(15:0cyclo/16:0)-PAMDB006498 [ C37 H71 O10 P, tgt=55.41, overall=55.41 ]			(710.82666, 34864.67)(711.74585, 13895.526)(710.50574, 8477.585)(689.4782, 7265.2114)(690.4813, 1159.1141)(727.5337, 279.725)(708.96136, 28685.34)(709.8038, 12924.553)(710.5045, 5907.2354)
CDP-DG(10:0(3-OH)/15:0cyclo)-PAMDB006750	-0.483354	-0.489774	-0.640405	0.358222	-0.081151	0.100593	0.081151	-0.198796	-0.148461	0.910613	0.584477	0.758096	CDP-DG(10:0(3-OH)/15:0cyclo)-PAMDB006750	CDP-DG(10:0(3-OH)/15:0cyclo)-PAMDB006750 [ C37 H65 N3 O16 P2, tgt=54.10, overall=54.10 ]			(851.38354, 167404.03)(852.3864, 74251.555)(853.38794, 14086.058)(854.3878, 230.82)
2-Acyl-sn-glycero-3-phosphoglycerol(n-C12:0)-PAMDB001555	0.282161	0.251435	0.128066	-0.243054	-0.128066	-0.324666	1.13242	-0.91829	0.940795	2.06566	-18.6277	-18.5107	2-Acyl-sn-glycero-3-phosphoglycerol(n-C12:0)-PAMDB001555	2-Acyl-sn-glycero-3-phosphoglycerol(n-C12:0)-PAMDB001555 [ C18 H36 O9 P, tgt=75.83, overall=75.83 ]			(446.24316, 307.99832)(432.2286, 30511.068)(432.19345, 41957.797)
L-4-Hydroxyglutamine_BMDB62272	0.816804	-0.436738	0.307845	-18.9195	-19.1931	0.258758	0.645802	-19.0054	-0.258758	1.47146	-18.3092	1.22805	L-4-Hydroxyglutamine_BMDB62272	L-4-Hydroxyglutamine_BMDB62272 [ C5 H10 N2 O4, tgt=81.93, overall=81.93 ]			(180.09885, 38913.04)(181.10196, 1933.615)
Amylose-PAMDB006199	-0.0588493	-0.0760212	-0.261229	0.0557594	-0.232574	-0.0459423	0.0459423	-0.447502	0.121695	0.928228	0.49037	0.795202	Amylose-PAMDB006199	Amylose-PAMDB006199 [ C14 H26 O11, tgt=65.14, overall=65.14 ]			(388.17715, 1308795.6)(389.17957, 192566.11)(390.18118, 13721.289)(370.16565, 11600.848)
PS(14:0(3-OH)/15:0cyclo)-PAMDB003968	0.446651	0.0849552	0.0247421	-0.2211	-0.0247421	-0.42104	0.941576	-0.623127	0.687801	2.06125	-17.1213	-17.0044	PS(14:0(3-OH)/15:0cyclo)-PAMDB003968	PS(14:0(3-OH)/15:0cyclo)-PAMDB003968 [ C35 H64 N O11 P, tgt=55.17, overall=55.17 ]			(688.41785, 16205.315)(689.4205, 4153.374)
DG(17:0cycw7c/12:0(3-OH)/0:0)-PAMDB006920	-11.684	12.1081	11.3857	-11.5215	-11.7951	11.3637	11.082	10.763	10.7709	-10.763	-10.9112	-10.7943	DG(17:0cycw7c/12:0(3-OH)/0:0)-PAMDB006920	DG(17:0cycw7c/12:0(3-OH)/0:0)-PAMDB006920 [ C32H60O6, tgt= ]			(544.4482, 314594.72)(545.4509, 97255.37)(546.4527, 12600.02)(547.45966, 8487.009)(558.46265, 81996.07)(559.4653, 21385.38)(560.4621, 8649.687)(561.465, 1402.4684)(563.41754, 24435.852)(564.4202, 5189.575)(565.4204, 205.72)
L-prolyl-L-proline_BMDB11180	-0.0863657	-0.598302	-0.455951	-0.423743	-0.920398	0.113051	-0.00911426	0.00911426	0.0656557	0.893525	0.365836	0.757974	L-prolyl-L-proline_BMDB11180	L-prolyl-L-proline_BMDB11180 [ C10 H16 N2 O3, tgt=72.60, overall=72.60 ]			(195.10756, 70280.42)(196.11026, 3424.4946)(195.10973, 140856.6)(196.11212, 9492.235)(235.16327, 2467.9338)(214.1394, 3643.827)
(2-Naphthyl)methanol-PAMDB000856	-0.175449	-0.0694981	0.477186	0.464909	-19.3248	0.0694981	-0.20694	-1.30023	0.743563	1.06143	-0.500841	1.068	(2-Naphthyl)methanol-PAMDB000856	(2-Naphthyl)methanol-PAMDB000856 [ C11 H10 O, tgt=69.22, overall=69.22 ]			(140.06526, 3435.81)(146.08928, 427.27002)(162.10976, 137727.58)(163.11276, 6067.1616)(184.61595, 6876.319)(186.07263, 21070.59)(166.40128, 12707.81)
2-octadec-11-enoyl-sn-glycerol3-phosphate-PAMDB001571	-0.611413	-0.215419	0.0871611	-0.200898	-0.545106	-0.0871611	0.368237	0.432509	0.508121	0.519425	-0.243398	0.585143	2-octadec-11-enoyl-sn-glycerol3-phosphate-PAMDB001571	2-octadec-11-enoyl-sn-glycerol3-phosphate-PAMDB001571 [ C21 H41 O7 P, tgt=51.44, overall=51.44 ]			(454.28366, 18882.092)(455.28632, 1940.4636)(460.26147, 486742.84)(461.26425, 119769.34)(462.266, 12316.758)(446.24475, 22954.697)
PE(16:1(9Z)/17:0)-PAMDB001481	0.739263	0.121028	0.126719	1.85193	-0.121028	-0.160155	-2.01349	-1.6871	-0.156909	-0.763692	0.497434	0.320834	PE(16:1(9Z)/17:0)-PAMDB001481	PE(16:1(9Z)/17:0)-PAMDB001481 [ C38 H74 N O8 P, tgt=78.91, overall=78.91 ]			(705.4061, 8891.826)(705.5334, 2825.9402)(685.52344, 1914.39)(686.5255, 1397.51)(706.5249, 5771.09)(689.5399, 4768.19)(703.5377, 52381.414)(704.5398, 16941.92)(708.49927, 121000.734)(709.50195, 47148.008)(710.504, 7441.666)
D-Glutamine-PAMDB000500	0.141857	0.391394	0.421642	0.48315	-0.141857	0.396551	-16.6314	0.609003	-16.5524	-15.7212	-15.8695	-15.7525	D-Glutamine-PAMDB000500	D-Glutamine-PAMDB000500 [ C5 H10 N2 O3, tgt=42.65, overall=42.65 ]			(128.05914, 4739.607)(147.0777, 3490.75)(129.4963, 11196.64)(133.0766, 1303.51)
4-(Glutamylamino)butanoate-PAMDB000824	0.57678	-0.021225	-0.355221	0.628582	0.317064	0.467428	-1.22406	0.134352	-1.2191	-0.384539	-0.590538	0.021225	4-(Glutamylamino)butanoate-PAMDB000824	4-(Glutamylamino)butanoate-PAMDB000824 [ C9 H16 N2 O5, tgt=70.22, overall=70.22 ]			(250.13701, 76279.33)(251.13972, 5810.4116)(236.13708, 51487.19)(237.14067, 6519.2065)
Cysteicacid-PAMDB000464	7.84171	11.8808	10.9353	-8.60023	-8.87387	8.75004	-8.75186	9.12471	9.47906	-7.84171	-7.98997	-7.873	Cysteicacid-PAMDB000464	Cysteicacid-PAMDB000464 [ C3 H7 N O5 S, tgt=35.19, overall=35.19 ]			(172.01396, 6814.69)(175.01674, 21316.545)(191.03519, 662.27)(169.03221, 39692.867)(170.03465, 2633.7349)(176.98041, 5655.19)
PS(16:0/17:0cycw7c)-PAMDB006721	-0.831249	20.5661	18.8849	-0.668741	20.0136	-0.654404	-0.82037	-0.754683	20.9897	0.0897732	-0.0584831	0.058485	PS(16:0/17:0cycw7c)-PAMDB006721	PS(16:0/17:0cycw7c)-PAMDB006721 [ C39H72NO10P, tgt= ]			(749.5203, 111.57)(733.5068, 383.90002)(764.5353, 1277.605)(766.5192, 3104.645)(767.5165, 296.24)
PE(18:1(9Z)/12:0(3-OH))-PAMDB003904	0.669246	-0.562436	-0.0661993	0.767516	-0.0490198	0.0490198	-0.474324	-0.474256	-20.5669	0.342788	0.217937	0.46161	PE(18:1(9Z)/12:0(3-OH))-PAMDB003904	PE(18:1(9Z)/12:0(3-OH))-PAMDB003904 [ C35 H68 N O9 P, tgt=69.51, overall=69.51 ]			(678.46674, 25124.46)(679.469, 6413.2886)
epoxyqueuosine-PAMDB003576	0.0667534	-0.0667534	-0.244011	-0.21126	-0.296331	-0.42802	0.224672	-0.445162	0.275536	1.29532	0.416315	0.969059	epoxyqueuosine-PAMDB003576	epoxyqueuosine-PAMDB003576 [ C17 H23 N5 O8, tgt=95.63, overall=95.63 ]			(425.14917, 165147.34)(426.15173, 26653.748)(427.15366, 1342.2574)(409.15503, 127139.71)(410.15762, 20945.873)(411.15994, 1540.9282)
Alanyl-Aspartic acid_BMDB62221	-0.383322	2.29862	1.46596	-20.6134	-20.887	-20.5991	-0.0923843	0.584774	0.0923843	-2.40102	2.12888	0.220026	Alanyl-Aspartic acid_BMDB62221	Alanyl-Aspartic acid_BMDB62221 [ C7 H12 N2 O5, tgt=46.77, overall=46.77 ]			(186.0641, 86455.78)(187.06085, 58075.75)(188.064, 862.15)(205.08578, 2860.2961)(187.24321, 31669.49)(189.07567, 4786.7036)(222.10675, 804.795)(210.05667, 10286.75)(211.05975, 317.22998)
Ile-Val-Val_BMDB62560	0.218689	0.160233	-0.0981159	0.104328	-20.8294	0.147587	-20.7074	0.149172	-20.6284	-19.7973	-0.452921	0.0981159	Ile-Val-Val_BMDB62560	Ile-Val-Val_BMDB62560 [ C16 H31 N3 O4, tgt=70.70, overall=70.70 ]			(330.2327, 2620.847)(331.56253, 3398.5315)(333.2318, 556.95)(311.21503, 709.31836)(315.63434, 18169.566)(314.2319, 3841.825)(347.2608, 26064.574)(348.26343, 2741.055)(331.09445, 7168.1616)(352.88583, 30902.148)(357.23, 29759.45)(334.33615, 14421.986)
Creatinine_BMDB00562	0.00927067	-1.29851	-1.80004	0.710307	0.395831	-0.470281	-0.00927067	-1.01643	-2.80138	1.52175	0.0147486	1.59523	Creatinine_BMDB00562	Creatinine_BMDB00562 [ C4 H7 N3 O, tgt=47.60, overall=47.60 ]			(115.56695, 3029.2952)(116.068, 3401.08)(114.064064, 41271.645)(115.066925, 1189.395)(118.084656, 1980252.0)(137.71762, 15686.375)(139.05515, 1452.405)
PE(15:0/15:0)-PAMDB006223	-1.69927	-0.0794153	1.18367	0.717597	-0.854392	0.805064	0.276002	0.0794153	0.273004	-20.6448	-1.03218	-0.673415	PE(15:0/15:0)-PAMDB006223	PE(15:0/15:0)-PAMDB006223 [ C35 H70 N O8 P, tgt=43.78, overall=43.78 ]			(645.4573, 7964.4365)(647.2157, 3809.6099)(648.1481, 21578.408)(649.3221, 6082.33)(649.73926, 9805.575)(650.491, 1413.5133)(685.7494, 101760.63)(686.5282, 28892.664)(687.5378, 17243.176)(689.4795, 9203.079)(690.4827, 1454.5865)(670.64374, 4944.2065)(674.4916, 2772.29)
N-Acetyl-L-glutamate5-semialdehyde-PAMDB000675	17.4822	17.298	-0.803545	-0.312298	-0.585938	-0.29796	18.1581	-0.398239	-0.384954	19.3548	0.29796	0.414928	N-Acetyl-L-glutamate5-semialdehyde-PAMDB000675	N-Acetyl-L-glutamate5-semialdehyde-PAMDB000675 [ C7 H11 N O4, tgt=74.76, overall=74.76 ]			(191.10283, 15537.248)(192.10625, 324.64)
PG(10:0(3-OH)/15:0cyclo)-PAMDB004028	9.18674	8.94556	8.88851	8.93053	8.70636	-9.30909	-9.47505	8.56491	-9.39608	-8.56491	-8.71317	-8.5962	PG(10:0(3-OH)/15:0cyclo)-PAMDB004028	PG(10:0(3-OH)/15:0cyclo)-PAMDB004028 [ C31 H59 O11 P, tgt=57.88, overall=57.88 ]			(638.40515, 10837.068)(639.408, 2158.0916)
PG(10:0/10:0(3-OH))-PAMDB004035	0.209188	0.00835228	-0.00835228	-0.578815	-0.346859	-0.116343	0.431301	-1.58292	0.0526257	1.64309	0.476877	-20.9316	PG(10:0/10:0(3-OH))-PAMDB004035	PG(10:0/10:0(3-OH))-PAMDB004035 [ C26 H51 O11 P, tgt=50.12, overall=50.12 ]			(571.3124, 88632.484)(572.31494, 19402.145)(573.31647, 1928.1044)(571.3136, 157763.44)(572.3162, 35471.34)(573.3176, 3750.73)(593.2928, 623.22)
16-Anhydro-N-acetylmuramate-PAMDB001327	10.8187	12.4994	10.9724	10.3839	-11.4161	-11.1281	11.2549	-11.2284	11.4071	-10.3839	-10.5322	-10.4152	16-Anhydro-N-acetylmuramate-PAMDB001327	16-Anhydro-N-acetylmuramate-PAMDB001327 [ C11 H17 N O7, tgt=25.16, overall=25.16 ]			(259.94266, 6833.035)(260.1089, 1708.13)(280.75452, 38172.01)(281.08963, 2287.4568)
2-nonyl-4-hydroxyquinoline(NHQ)-PAMDB100073	-1.10975	-0.436876	0.0701733	-0.80023	0.115211	-0.0701733	1.5669	1.19866	1.29987	0.136377	-17.8913	-17.7743	2-nonyl-4-hydroxyquinoline(NHQ)-PAMDB100073	2-nonyl-4-hydroxyquinoline(NHQ)-PAMDB100073 [ C18 H25 N O, tgt=47.05, overall=47.05 ]			(271.1853, 28991.979)(272.18823, 2207.8726)(275.21564, 4115.4673)(277.11157, 6289.066)(277.2107, 6262.92)(257.2062, 13011.885)(258.20917, 1104.3971)(294.23602, 23637.19)(298.19516, 666.978)
DG(19:iso/10:0/0:0)-PAMDB006945	-9.57441	8.65338	12.2549	-9.4119	-9.68554	-9.39756	12.3093	12.6773	12.7413	-8.65338	-8.80164	9.55424	DG(19:iso/10:0/0:0)-PAMDB006945	DG(19:iso/10:0/0:0)-PAMDB006945 [ C32H62O5, tgt= ]			(508.44626, 2627.6516)(509.4481, 827.45496)(509.44672, 20117.375)(510.44934, 4130.5176)(552.4706, 9527.51)(553.474, 808.05)(535.46075, 6187.7476)
D-4'-Phosphopantothenate-PAMDB000227	8.81801	8.11403	8.3131	8.90672	8.43662	8.30152	-9.02417	-8.95849	-8.9452	-8.11403	-8.26229	-8.14532	D-4'-Phosphopantothenate-PAMDB000227	D-4'-Phosphopantothenate-PAMDB000227 [ C9 H18 N O8 P, tgt=65.53, overall=65.53 ]			(283.0681, 32061.264)(284.07037, 1645.4825)(300.0829, 11812.195)(301.0878, 3176.4402)(283.0689, 35732.6)(284.07126, 2383.24)
PE(17:0/16:1(9Z))-PAMDB001476	0.739263	0.121028	0.126719	1.85193	-0.121028	-0.160155	-2.01349	-1.6871	-0.156909	-0.763692	0.497434	0.320834	PE(17:0/16:1(9Z))-PAMDB001476	PE(17:0/16:1(9Z))-PAMDB001476 [ C38 H74 N O8 P, tgt=78.91, overall=78.91 ]			(705.4061, 8891.826)(705.5334, 2825.9402)(685.52344, 1914.39)(686.5255, 1397.51)(706.5249, 5771.09)(689.5399, 4768.19)(703.5377, 52381.414)(704.5398, 16941.92)(708.49927, 121000.734)(709.50195, 47148.008)(710.504, 7441.666)
DG(16:1(9Z)/12:0/0:0)-PAMDB003677	2.60795	0.9677	-0.157878	-0.141501	-24.3026	0.19019	-0.867475	-0.665381	-0.361556	0.141501	1.27944	2.34624	DG(16:1(9Z)/12:0/0:0)-PAMDB003677	DG(16:1(9Z)/12:0/0:0)-PAMDB003677 [ C31 H58 O5, tgt=69.35, overall=69.35 ]			(493.0103, 19566.178)(494.41818, 7336.7983)(495.4309, 43930.562)(496.4337, 10123.756)(493.41595, 53151.586)(494.4187, 12790.67)(533.6142, 44962.742)(534.5312, 9084.183)(535.43066, 5245.125)(515.40405, 356943.78)(516.4068, 103701.9)(517.40674, 23579.373)(518.4065, 5046.676)
2-Aminobut-2-enoate-PAMDB004138	-0.254737	-0.255809	-0.418265	0.469695	0.00612164	0.18921	-0.00303364	0.00303364	-0.168256	0.901908	-2.79128	0.742696	2-Aminobut-2-enoate-PAMDB004138	2-Aminobut-2-enoate-PAMDB004138 [ C4 H7 N O2, tgt=64.58, overall=64.58 ]			(103.05218, 8548.021)(104.05967, 5776.7817)(119.0835, 554503.8)(120.08655, 36933.766)(124.0377, 47870.55)(125.0403, 862.67)
Val-Phe-Val-Tyr_BMDB62577	0.920181	0.696606	0.741091	0.0193729	0.125532	0.00699425	-1.56101	-18.1585	-1.65226	-0.00699425	-17.4623	-0.451664	Val-Phe-Val-Tyr_BMDB62577	Val-Phe-Val-Tyr_BMDB62577 [ C28 H38 N4 O6, tgt=27.35, overall=27.35 ]			(550.26843, 7858.87)(551.26685, 4341.9824)(532.2751, 18461.916)(533.2774, 2293.6133)(534.27405, 1139.7141)
2-Acyl-sn-glycero-3-phosphoglycerol(N-C16:1)-PAMDB001559	16.5076	17.4144	17.9223	-0.668741	-0.942381	-0.654404	18.4502	-0.754683	-0.741398	0.0897732	-0.0584831	0.058485	2-Acyl-sn-glycero-3-phosphoglycerol(N-C16:1)-PAMDB001559	2-Acyl-sn-glycero-3-phosphoglycerol(N-C16:1)-PAMDB001559 [ C22 H42 O9 P, tgt=15.15, overall=15.15 ]			(487.29077, 746.6)
DG(18:1(11Z)/10:0/0:0)-PAMDB006461	2.60795	0.9677	-0.157878	-0.141501	-24.3026	0.19019	-0.867475	-0.665381	-0.361556	0.141501	1.27944	2.34624	DG(18:1(11Z)/10:0/0:0)-PAMDB006461	DG(18:1(11Z)/10:0/0:0)-PAMDB006461 [ C31 H58 O5, tgt=69.35, overall=69.35 ]			(493.0103, 19566.178)(494.41818, 7336.7983)(495.4309, 43930.562)(496.4337, 10123.756)(493.41595, 53151.586)(494.4187, 12790.67)(533.6142, 44962.742)(534.5312, 9084.183)(535.43066, 5245.125)(515.40405, 356943.78)(516.4068, 103701.9)(517.40674, 23579.373)(518.4065, 5046.676)
PG(16:0/15:0)-PAMDB006381	2.05312	0.613619	-23.748	0.40502	0.158459	-0.158459	-0.603779	-0.512297	-0.560699	-22.4983	1.8098	1.63563	PG(16:0/15:0)-PAMDB006381	PG(16:0/15:0)-PAMDB006381 [ C37 H73 O10 P, tgt=48.96, overall=48.96 ]			(694.481, 2599.76)(695.484, 804.79)(729.4028, 5643.1475)(728.5351, 1099.59)(729.5462, 5266.34)(709.01166, 86380.586)(710.0143, 33554.082)(710.5038, 9640.376)(731.4689, 7569.12)(732.4718, 1519.734)
N-Acetylphosphinothricin-PAMDB004741	-0.126179	16.7475	-0.454918	0.0363293	-0.23731	0.0506668	-0.115299	-0.049612	-0.0363274	0.794844	0.646587	0.763556	N-Acetylphosphinothricin-PAMDB004741	N-Acetylphosphinothricin-PAMDB004741 [ C7 H14 N O5 P, tgt= ]			(224.0633, 7522.92)(225.0953, 837.77)
PE(10:0/16:0)-PAMDB001986	-0.366112	-0.292303	-0.843826	-0.145761	-0.230135	-0.029438	0.374624	0.267141	0.029438	0.826031	1.10939	0.718037	PE(10:0/16:0)-PAMDB001986	PE(10:0/16:0)-PAMDB001986 [ C31 H62 N O8 P, tgt=90.01, overall=90.01 ]			(631.4773, 191.41)(609.4496, 197950.42)(610.45245, 63076.52)(611.4577, 12731.375)(612.46387, 847.44995)(613.47766, 7508.214)
15-Methylhexadecanoic acid_BMDB62092	0.30055	-0.0630779	-0.223017	0.36594	0.0736389	0.403433	-1.19814	0.0630779	0.481794	-0.382641	-18.7456	-18.6286	15-Methylhexadecanoic acid_BMDB62092	15-Methylhexadecanoic acid_BMDB62092 [ C17 H34 O2, tgt=98.99, overall=98.99 ]			(253.2469, 1082.905)(256.2605, 7844102.5)(257.2631, 1641677.0)(258.2659, 137139.61)(296.25354, 5551562.0)(297.25684, 1057812.6)(298.26004, 100282.19)(277.5452, 5033.028)(278.6903, 39817.203)(280.25763, 229927.31)
Phe-Phe-Pro-Arg_BMDB62571	16.8744	19.8769	-1.15999	-0.668741	19.5368	-0.654404	15.4878	-0.754683	-0.741398	0.0897732	-0.0584831	0.058485	Phe-Phe-Pro-Arg_BMDB62571	Phe-Phe-Pro-Arg_BMDB62571 [ C29 H39 N7 O5, tgt=25.10, overall=25.10 ]			(566.3017, 2289.9768)(571.3113, 88771.25)(583.3498, 6155.21)(570.3398, 3635.12)
Pentadecanoic acid_BMDB00826	-22.0047	5.94874	-22.3334	-21.8422	-22.1158	-21.8278	5.04495	-5.04304	5.04304	6.15573	5.91153	6.16814	Pentadecanoic acid_BMDB00826	Pentadecanoic acid_BMDB00826 [ C15H30O2, tgt= ]			(267.2156, 115.61)(228.22845, 7897682.5)(229.2312, 1499636.6)(230.2349, 214235.23)(247.2355, 447.28003)(247.2011, 6296.74)(242.24432, 3671929.0)(243.24756, 568778.75)(244.24977, 32178.22)
Tryptophyl-Arginine_BMDB62263	0.724592	0.154613	0.246675	0.900057	0.372578	0.676929	-1.18566	-0.154613	-0.952257	-20.7028	-20.851	-0.51882	Tryptophyl-Arginine_BMDB62263	Tryptophyl-Arginine_BMDB62263 [ C17 H24 N6 O3, tgt=45.99, overall=45.99 ]			(361.2034, 209362.47)(362.20593, 30252.258)(363.20776, 2644.192)(361.2041, 275376.06)(362.2066, 41146.11)(363.2088, 2408.25)
PS(19:iso/10:0(3-OH))-PAMDB004008	-0.145521	-0.108856	-0.581821	-0.219355	-0.234129	-0.338436	0.389105	0.108856	0.605173	1.25394	0.43609	1.29806	PS(19:iso/10:0(3-OH))-PAMDB004008	PS(19:iso/10:0(3-OH))-PAMDB004008 [ C35 H66 N O11 P, tgt=47.95, overall=47.95 ]			(713.41016, 120633.625)(714.4126, 36948.496)(715.41406, 4999.241)
PS(17:0cycw7c/12:0)-PAMDB006727	-0.145521	-0.108856	-0.581821	-0.219355	-0.234129	-0.338436	0.388393	0.108856	0.605173	1.25394	0.43609	1.29806	PS(17:0cycw7c/12:0)-PAMDB006727	PS(17:0cycw7c/12:0)-PAMDB006727 [ C35 H64 N O10 P, tgt=47.95, overall=47.95 ]			(713.41016, 120633.625)(714.4126, 36948.496)(715.41406, 4999.241)
Palmitoleicacid-PAMDB001837	0.834272	-1.11904	0.522583	1.21881	1.0096	1.30811	-0.615374	-0.395277	-0.627205	-0.0630321	0.0630321	-0.140188	Palmitoleicacid-PAMDB001837	Palmitoleicacid-PAMDB001837 [ C16 H30 O2, tgt=71.54, overall=71.54 ]			(277.2119, 710736.44)(278.21484, 117515.305)(279.22162, 10447.88)(237.2165, 2614.724)(255.22687, 1764.4333)(259.2009, 36437.95)(260.20374, 3981.9187)(261.2147, 255.45)
1-Acyl-sn-glycero-3-phosphoethanolamine(N-C18:0)-PAMDB001527	0.828074	-0.108183	0.130537	0.574472	-17.9618	0.402714	-17.8398	0.108183	-0.670366	0.658564	-17.0779	-16.9609	1-Acyl-sn-glycero-3-phosphoethanolamine(N-C18:0)-PAMDB001527	1-Acyl-sn-glycero-3-phosphoethanolamine(N-C18:0)-PAMDB001527 [ C23 H48 N O7 P, tgt=60.91, overall=60.91 ]			(485.3284, 27507.803)(486.3167, 13902.7)(463.2935, 11406.867)(464.29614, 769.545)(485.3367, 884.81)(502.36435, 99332.586)(503.3669, 21387.17)(504.3689, 1246.1881)(485.6803, 2042.3232)(486.3676, 2190.28)(507.31943, 6753.581)
PS(15:0cyclo/14:0)-PAMDB006714	-0.145521	-0.108856	-0.581821	-0.219355	-0.234129	-0.338436	0.388393	0.108856	0.605173	1.25394	0.43609	1.29806	PS(15:0cyclo/14:0)-PAMDB006714	PS(15:0cyclo/14:0)-PAMDB006714 [ C35 H64 N O10 P, tgt=47.95, overall=47.95 ]			(713.41016, 120633.625)(714.4126, 36948.496)(715.41406, 4999.241)
Arachidonic acid_BMDB01043	-0.279685	-0.00561428	-0.602277	0.0827818	-22.7027	0.182963	0.00420856	0.575076	-0.00420856	-21.6706	0.712369	0.616342	Arachidonic acid_BMDB01043	Arachidonic acid_BMDB01043 [ C20 H32 O2, tgt=50.36, overall=50.36 ]			(305.24146, 20355.553)(306.24463, 1529.711)(307.255, 216.58)(322.26837, 190274.66)(323.27115, 29784.2)(324.28113, 3987.4668)(332.24957, 51979.188)
DG(18:0/10:0/0:0)-PAMDB003685	-1.41117	-2.4348	0.0582428	-23.431	1.63198	-0.0582428	0.508856	0.12331	-0.129759	3.34768	0.642914	-1.08233	DG(18:0/10:0/0:0)-PAMDB003685	DG(18:0/10:0/0:0)-PAMDB003685 [ C31 H60 O5, tgt=45.39, overall=45.39 ]			(494.41882, 8531.014)(495.43134, 73688.05)(496.43423, 17552.883)(497.43658, 2293.38)(534.6793, 17371.271)(535.7049, 5836.862)(536.4906, 1760.7125)(535.4336, 1021.89)(518.7008, 66688.51)(519.70306, 9137.191)(519.9314, 2226.52)
Citraconicacid-PAMDB001792	0.101378	1.96096	0.856847	-16.6485	-16.9222	-16.6342	0.519427	-0.101378	0.79285	-15.89	0.709695	-15.9213	Citraconicacid-PAMDB001792	Citraconicacid-PAMDB001792 [ C5 H6 O4, tgt=14.50, overall=14.50 ]			(148.05728, 7170.6255)(130.04694, 3446.9973)(157.02136, 122365.1)(158.02429, 3252.4648)
CDP-DG(15:0/19:1(9Z))-PAMDB003745	-0.126179	16.4722	-0.454918	0.0363293	-0.23731	0.0506668	-0.115299	-0.049612	-0.0363274	17.6155	19.8952	17.6343	CDP-DG(15:0/19:1(9Z))-PAMDB003745	CDP-DG(15:0/19:1(9Z))-PAMDB003745 [ C46 H83 N3 O15 P2, tgt= ]			(979.5456, 1956.58)(997.559, 8719.345)(998.5616, 5412.7354)
2-dehydro-36-dideoxy-6-sulfo-D-gluconicacid-PAMDB100033	-0.831249	18.4397	17.693	-0.668741	-0.942381	-0.654404	-0.82037	17.332	17.7384	0.0897732	-0.0584831	0.058485	2-dehydro-36-dideoxy-6-sulfo-D-gluconicacid-PAMDB100033	2-dehydro-36-dideoxy-6-sulfo-D-gluconicacid-PAMDB100033 [ C6 H10 O8 S, tgt=50.22, overall=50.22 ]			(260.04822, 32575.445)(261.05096, 1035.6525)(262.0467, 603.3)
DG(16:1(9Z)/18:0/0:0)-PAMDB003682	0.541729	0.0660953	-0.32855	-0.0319977	0.0319977	0.125782	-20.5274	0.125782	-20.4484	0.564198	-19.7655	-0.174486	DG(16:1(9Z)/18:0/0:0)-PAMDB003682	DG(16:1(9Z)/18:0/0:0)-PAMDB003682 [ C37 H70 O5, tgt=86.88, overall=86.88 ]			(595.5277, 3053.7446)(578.30383, 1318.0701)(617.51105, 60465.168)(618.51355, 17875.205)(619.5129, 1998.7067)(601.00995, 15267.578)(601.5102, 4220.9062)(603.52246, 593.6367)
PE(16:1(9Z)/16:0)-PAMDB000760	-2.27837	-1.12275	1.72389	2.81196	1.07598	-21.0459	2.76707	2.70729	0.91389	-20.3017	-20.4499	-0.91389	PE(16:1(9Z)/16:0)-PAMDB000760	PE(16:1(9Z)/16:0)-PAMDB000760 [ C37 H72 N O8 P, tgt=52.49, overall=52.49 ]			(689.98596, 6708.81)(690.4833, 2250.19)(675.8234, 9314.354)(677.504, 3160.8252)(690.493, 145.3)(674.5031, 13143.329)(675.675, 3969.332)(676.67834, 9102.69)(677.3168, 2645.5479)(677.51886, 11326.82)(678.52106, 3098.8867)(709.53357, 18325.473)(712.03796, 12052.402)(713.05, 17268.67)(712.5439, 3806.4)(713.5567, 14878.42)(694.5498, 2149.36)(716.0067, 5874.689)(717.51166, 2246.5017)(718.5253, 2381.746…
PG(17:0/16:1(9Z))-PAMDB001486	0.420682	1.432	1.03471	-20.4867	0.58962	-0.331593	0.905972	0.0415544	-0.0415544	-19.7282	-19.8764	-19.7595	PG(17:0/16:1(9Z))-PAMDB001486	PG(17:0/16:1(9Z))-PAMDB001486 [ C39 H75 O10 P, tgt=24.22, overall=24.22 ]			(716.508, 18227.871)(717.5109, 6235.534)(718.5132, 90.75)(722.54034, 749.7967)(758.55676, 14825.3955)(735.5453, 553.815)(737.5546, 1555.65)(740.50726, 5997.25)(741.51, 1267.1799)
DG(19:1(9Z)/16:1(9Z)/0:0)-PAMDB003708	-0.526121	21.1834	-0.85486	-0.363613	-0.637253	19.0354	21.6374	-0.449554	-0.43627	20.781	18.9143	0.363613	DG(19:1(9Z)/16:1(9Z)/0:0)-PAMDB003708	DG(19:1(9Z)/16:1(9Z)/0:0)-PAMDB003708 [ C38H70O5, tgt= ]			(590.76526, 3634.715)(591.5223, 2709.22)(613.51605, 54516.02)(614.51855, 15647.3545)(615.52576, 6234.0225)(615.5256, 4791.99)(616.5288, 264.99)
DG(12:0(3-OH)/19:iso/0:0)-PAMDB006878	0.149675	1.48292	-21.8022	-0.149675	2.61784	-1.44852	4.14369	3.00418	4.00943	-1.8585	-20.7007	-20.5838	DG(12:0(3-OH)/19:iso/0:0)-PAMDB006878	DG(12:0(3-OH)/19:iso/0:0)-PAMDB006878 [ C34 H66 O6, tgt=63.33, overall=63.33 ]			(570.8194, 157659.52)(571.82184, 53141.61)(574.4841, 32128.41)(575.4912, 19814.47)(576.4948, 2791.74)(556.1392, 4009.78)(574.4882, 212765.06)(575.82886, 87149.37)(576.50024, 48906.812)(576.4954, 2595.96)(577.5081, 48345.32)(572.501, 28941.496)(573.504, 7570.62)(574.5096, 86.98)(596.4782, 74160.555)(597.4807, 21082.58)(598.4921, 198084.14)(599.49585, 65325.47)
Margaricacid-PAMDB001901	0.30055	-0.0630779	-0.223017	0.36594	0.0736389	0.403433	-1.19814	0.0630779	0.481794	-0.382641	-18.7456	-18.6286	Margaricacid-PAMDB001901	Margaricacid-PAMDB001901 [ C17 H34 O2, tgt=98.99, overall=98.99 ]			(253.2469, 1082.905)(256.2605, 7844102.5)(257.2631, 1641677.0)(258.2659, 137139.61)(296.25354, 5551562.0)(297.25684, 1057812.6)(298.26004, 100282.19)(277.5452, 5033.028)(278.6903, 39817.203)(280.25763, 229927.31)
PS(18:1(9Z)/14:0(3-OH))-PAMDB004001	-20.6762	0.527412	0.0919952	0.0747547	-0.247738	0.225168	-0.0747547	-1.16688	-0.743008	-19.7552	0.431734	1.61902	PS(18:1(9Z)/14:0(3-OH))-PAMDB004001	PS(18:1(9Z)/14:0(3-OH))-PAMDB004001 [ C38H70NO11P, tgt= ]			(731.46893, 13105.193)(732.4718, 3188.133)
PG(15:0cyclo/17:0cycw7c)-PAMDB006499	-1.87258	0.0330496	-21.2768	-20.7856	0.365495	0.693898	-0.0330496	0.623986	-20.8582	-20.027	0.480268	1.02277	PG(15:0cyclo/17:0cycw7c)-PAMDB006499	PG(15:0cyclo/17:0cycw7c)-PAMDB006499 [ C38 H71 O10 P, tgt=44.52, overall=44.52 ]			(722.4914, 1126.25)(723.4939, 360.875)(705.4967, 180.81)(721.0056, 4981.032)(722.0078, 1364.7775)(722.4885, 1991.39)(723.4911, 513.14)(704.50195, 164.20999)(719.6618, 5506.862)(721.5174, 722.45)(725.46497, 506.27197)
Glycyl-Arginine_BMDB62234	0.282816	-0.161058	0.0103722	0.751909	0.223196	-0.0844231	0.457874	-0.586479	-0.0103722	0.843338	-18.7787	-18.6617	Glycyl-Arginine_BMDB62234	Glycyl-Arginine_BMDB62234 [ C8 H17 N5 O3, tgt=56.15, overall=56.15 ]			(232.02013, 33742.867)(232.13274, 2338.473)(235.27094, 49498.715)(217.139, 371.39)(236.17065, 6644.5615)(257.13058, 1672.14)(239.11931, 2662.5466)
Myo-inositol1-phosphate-PAMDB000086	-0.831249	18.568	17.8579	-0.668741	-0.942381	-0.654404	-0.82037	17.3699	17.7674	0.0897732	-0.0584831	0.058485	Myo-inositol1-phosphate-PAMDB000086	Myo-inositol1-phosphate-PAMDB000086 [ C6 H13 O9 P, tgt=48.78, overall=48.78 ]			(261.03217, 2155.51)(260.04822, 28408.873)(261.54883, 695.8)(262.0468, 497.13)(283.01324, 1107.245)
Phenylalanyl-Alanine_BMDB62254	0.246893	-0.365332	0.149134	-1.15751	-0.731743	0.0347862	0.528082	-1.60872	-0.41934	1.27439	-0.0347862	0.710651	Phenylalanyl-Alanine_BMDB62254	Phenylalanyl-Alanine_BMDB62254 [ C12 H16 N2 O3, tgt=68.89, overall=68.89 ]			(238.116, 506.18)(224.12372, 10216.688)(256.3315, 1300.2418)(258.15286, 3052.4458)(236.1372, 122213.086)(237.14058, 12434.46)(261.1043, 289.12)(246.10509, 686.29865)
PGP(16:0/19:iso)-PAMDB006606	0.0703878	0.114743	-0.116275	-0.228372	-0.0793161	-0.0703878	0.238133	-1.21279	0.237395	0.627847	-1.26398	0.0801401	PGP(16:0/19:iso)-PAMDB006606	PGP(16:0/19:iso)-PAMDB006606 [ C41 H82 O13 P2, tgt=40.67, overall=40.67 ]			(868.50116, 32812.88)(869.5037, 11741.782)(870.505, 1770.7545)
CDP-DG(18:1(11Z)/16:0)-PAMDB000726	-0.126179	16.4722	-0.454918	0.0363293	-0.23731	0.0506668	-0.115299	-0.049612	-0.0363274	17.6155	19.8952	17.6343	CDP-DG(18:1(11Z)/16:0)-PAMDB000726	CDP-DG(18:1(11Z)/16:0)-PAMDB000726 [ C46 H83 N3 O15 P2, tgt= ]			(979.5456, 1956.58)(997.559, 8719.345)(998.5616, 5412.7354)
2-Aminoacrylicacid-PAMDB000519	-0.816658	-0.990898	-0.991417	4.36143	-1.24079	4.24581	-0.190397	3.79574	-0.458656	0.576675	4.68288	0.190397	2-Aminoacrylicacid-PAMDB000519	2-Aminoacrylicacid-PAMDB000519 [ C3 H5 N O2, tgt=64.42, overall=64.42 ]			(105.067986, 246612.42)(106.07089, 14003.625)
PE(19:0cycv8c/14:0)-PAMDB006693	0.739263	0.121028	0.126719	1.85193	-0.121028	-0.160155	-2.01349	-1.6871	-0.156909	-0.763692	0.497434	0.320834	PE(19:0cycv8c/14:0)-PAMDB006693	PE(19:0cycv8c/14:0)-PAMDB006693 [ C38 H74 N O8 P, tgt=78.91, overall=78.91 ]			(705.4061, 8891.826)(705.5334, 2825.9402)(685.52344, 1914.39)(686.5255, 1397.51)(706.5249, 5771.09)(689.5399, 4768.19)(703.5377, 52381.414)(704.5398, 16941.92)(708.49927, 121000.734)(709.50195, 47148.008)(710.504, 7441.666)
DG(18:1(9Z)/18:0/0:0)-PAMDB003700	0.482298	1.75502	3.13541	4.39574	1.67216	4.04458	-1.58787	-0.482298	-2.44229	-22.4596	-22.6079	-22.4909	DG(18:1(9Z)/18:0/0:0)-PAMDB003700	DG(18:1(9Z)/18:0/0:0)-PAMDB003700 [ C39 H74 O5, tgt=60.79, overall=60.79 ]			(605.5359, 7751.8525)(606.5392, 31.775002)(645.6144, 317.86)(628.0902, 571088.25)(629.09515, 221450.5)(630.09814, 38308.56)(631.54596, 6152.722)
Maltotetraose-PAMDB000327	-0.14356	-0.478909	0.699516	-0.826031	-1.61822	0.343037	0.14356	-0.200821	-0.394259	0.321573	1.08349	1.2114	Maltotetraose-PAMDB000327	Maltotetraose-PAMDB000327 [ C24 H42 O21, tgt=25.62, overall=25.62 ]			(667.2166, 20390.033)(668.2188, 3035.5994)(649.20593, 11446.645)(650.2089, 1958.475)
DG(10:0(3-OH)/19:0cycv8c/0:0)-PAMDB006863	-11.684	12.1081	11.3857	-11.5215	-11.7951	11.3637	11.082	10.763	10.7709	-10.763	-10.9112	-10.7943	DG(10:0(3-OH)/19:0cycv8c/0:0)-PAMDB006863	DG(10:0(3-OH)/19:0cycv8c/0:0)-PAMDB006863 [ C32H60O6, tgt= ]			(544.4482, 314594.72)(545.4509, 97255.37)(546.4527, 12600.02)(547.45966, 8487.009)(558.46265, 81996.07)(559.4653, 21385.38)(560.4621, 8649.687)(561.465, 1402.4684)(563.41754, 24435.852)(564.4202, 5189.575)(565.4204, 205.72)
Thioglycolate-PAMDB001967	18.9371	17.1277	18.8247	19.2146	-0.958025	-0.670048	-0.836014	-0.770327	-0.757042	0.0741291	-0.0741272	21.8416	Thioglycolate-PAMDB001967	Thioglycolate-PAMDB001967 [ C2 H4 O2 S, tgt=76.18, overall=76.18 ]			(114.98201, 81500.984)(115.97929, 1136.676)
DG(17:0cycw7c/19:0cycv8c/0:0)-PAMDB006928	24.8984	24.0727	-0.498417	-0.00716972	-0.280809	0.00716782	-0.158798	-0.093111	-0.0798264	0.751345	23.4414	0.720057	DG(17:0cycw7c/19:0cycv8c/0:0)-PAMDB006928	DG(17:0cycw7c/19:0cycv8c/0:0)-PAMDB006928 [ C39 H72 O5, tgt=34.69, overall=34.69 ]			(625.5742, 18463.03)(626.5768, 5995.15)(603.5174, 64889.25)(604.5235, 14714.08)(638.5687, 4160.66)(625.5756, 937.81)(643.52655, 8208.475)(644.5307, 4159.79)(628.5393, 53107.53)(629.54193, 16587.895)(630.54395, 1202.245)
Galactose1-phosphate-PAMDB000556	-0.831249	18.568	17.8579	-0.668741	-0.942381	-0.654404	-0.82037	17.3699	17.7674	0.0897732	-0.0584831	0.058485	Galactose1-phosphate-PAMDB000556	Galactose1-phosphate-PAMDB000556 [ C6 H13 O9 P, tgt=48.78, overall=48.78 ]			(261.03217, 2155.51)(260.04822, 28408.873)(261.54883, 695.8)(262.0468, 497.13)(283.01324, 1107.245)
Mannitol1-phosphate-PAMDB001829	1.02466	2.89538	1.72887	0.232448	-0.232448	-17.6812	-17.8472	1.32622	1.49911	-16.937	-17.0853	-16.9683	Mannitol1-phosphate-PAMDB001829	Mannitol1-phosphate-PAMDB001829 [ C6 H15 O9 P, tgt=43.01, overall=43.01 ]			(262.0467, 623.6275)(280.08676, 54385.887)(281.0895, 3379.3176)(289.04153, 1812.4166)
D-threo-Isocitricacid-PAMDB006191	-0.0429115	3.47925	3.288	-17.951	-18.2247	0.906315	0.0429115	2.00931	2.50661	-17.1925	-17.3408	-17.2238	D-threo-Isocitricacid-PAMDB006191	D-threo-Isocitricacid-PAMDB006191 [ C6 H8 O7, tgt=43.47, overall=43.47 ]			(175.01619, 17694.09)(193.03044, 3874.8035)(210.05661, 13867.612)(211.05975, 388.815)(215.44235, 16202.124)(217.5182, 2327.1401)
Threoninyl-Valine_BMDB62262	-19.9276	0.312718	0.0645266	0.96469	0.666963	0.855197	-1.38673	0.0736647	-1.35159	-0.487332	-0.656219	-0.0645266	Threoninyl-Valine_BMDB62262	Threoninyl-Valine_BMDB62262 [ C9H18N2O4, tgt= ]			(236.15805, 53566.21)(237.16066, 3643.75)(238.1732, 607.24)(219.15477, 1719.021)
Alanyl-Proline_BMDB62223	20.2661	19.19	18.868	20.0053	-1.01651	19.5829	-0.894499	-0.828812	-0.815527	0.0156441	-0.132612	-0.0156441	Alanyl-Proline_BMDB62223	Alanyl-Proline_BMDB62223 [ C8 H14 N2 O3, tgt=39.96, overall=39.96 ]			(170.69444, 2059.434)(171.0953, 203.69)(187.1129, 4850.545)(209.09332, 2930.6475)(196.0906, 245.45)
PE(12:0(3-OH)/10:0(3-OH))-PAMDB003848	0.5529	0.274502	-1.55726	-0.0280342	0.0280342	0.137173	0.907843	-0.959093	-0.784056	1.58807	-17.261	-17.1441	PE(12:0(3-OH)/10:0(3-OH))-PAMDB003848	PE(12:0(3-OH)/10:0(3-OH))-PAMDB003848 [ C27 H54 N O10 P, tgt=60.29, overall=60.29 ]			(583.34937, 5111.5767)(570.33984, 2584.51)(567.35223, 8632.164)(568.3548, 1652.9229)(601.3833, 3885.423)
PG(16:1(9Z)/15:0)-PAMDB006384	-2.02	-2.59431	-3.49277	-2.41265	0.00765324	0.386426	1.17784	1.01104	-0.00765324	2.1814	2.41417	-20.5862	PG(16:1(9Z)/15:0)-PAMDB006384	PG(16:1(9Z)/15:0)-PAMDB006384 [ C37 H71 O10 P, tgt=55.41, overall=55.41 ]			(710.82666, 34864.67)(711.74585, 13895.526)(710.50574, 8477.585)(689.4782, 7265.2114)(690.4813, 1159.1141)(727.5337, 279.725)(708.96136, 28685.34)(709.8038, 12924.553)(710.5045, 5907.2354)
PE(14:0/10:0)-PAMDB002004	10.2594	9.92588	-11.0243	9.92762	9.84785	-10.5187	9.77457	-10.619	9.99211	-9.77457	-9.92283	-9.80586	PE(14:0/10:0)-PAMDB002004	PE(14:0/10:0)-PAMDB002004 [ C29 H58 N O8 P, tgt=59.95, overall=59.95 ]			(601.4276, 29855.314)(602.4307, 4948.692)(579.4148, 32056.295)(580.4172, 4549.408)(590.3895, 1284.9299)
N-Formyl-L-methionine_BMDB01015	-17.8364	-0.24835	0.302727	0.895845	0.438354	3.82361	0.422424	0.24835	-17.7466	-16.9154	-17.0636	-16.9467	N-Formyl-L-methionine_BMDB01015	N-Formyl-L-methionine_BMDB01015 [ C6 H11 N O3 S, tgt=21.81, overall=21.81 ]			(195.08467, 17991.057)(177.06645, 5341.0327)(178.0596, 147.79)
DG(12:0/10:0(3-OH)/0:0)-PAMDB006879	2.19089	1.06815	0.501209	0.376354	0.244299	-0.106964	-19.7362	-0.868938	-19.6572	-0.624733	-0.24164	0.106964	DG(12:0/10:0(3-OH)/0:0)-PAMDB006879	DG(12:0/10:0(3-OH)/0:0)-PAMDB006879 [ C25 H48 O6, tgt=72.90, overall=72.90 ]			(430.3561, 2513.39)(446.35153, 31842.682)(447.35446, 5359.525)(465.38434, 33761.863)(466.38712, 7741.7705)(467.40045, 110003.836)(468.40317, 25476.773)(446.3508, 42675.82)(447.3538, 8096.65)(451.3299, 2951.312)(452.3326, 114.06)(445.11923, 5845.5874)(446.56723, 910.9181)
DG(19:iso/19:iso/0:0)-PAMDB006952	-23.5974	-1.64533	1.14495	0.821201	-1.67994	0.181507	-0.72212	-0.181507	0.395777	1.08389	2.89461	-22.7077	DG(19:iso/19:iso/0:0)-PAMDB006952	DG(19:iso/19:iso/0:0)-PAMDB006952 [ C41 H80 O5, tgt= ]			(675.6631, 149.45)(657.5747, 212755.58)(658.5762, 33978.777)(659.57776, 3071.688)
DG(22:6(4Z7Z10Z13Z16Z19Z)/18:1(11Z)/0:0)-PAMDB006215	0.0600395	2.43021	0.751827	-20.1829	1.23664	0.170605	0.0561161	-0.0561161	-0.179806	-19.4244	-19.5727	-1.62859	DG(22:6(4Z7Z10Z13Z16Z19Z)/18:1(11Z)/0:0)-PAMDB006215	DG(22:6(4Z7Z10Z13Z16Z19Z)/18:1(11Z)/0:0)-PAMDB006215 [ C43 H70 O5, tgt=62.06, overall=62.06 ]			(669.8778, 14421.554)(671.21686, 22059.969)(671.5503, 17964.09)(672.5587, 9549.31)(649.8516, 26850.096)(651.52594, 12683.395)(652.5354, 2648.1401)(653.5393, 825.72)(670.55273, 30243.928)(671.5536, 9303.66)(672.56146, 2750.1833)(650.52277, 42791.53)(651.5258, 13663.528)(652.5353, 4336.848)(653.7426, 898.91406)(654.55145, 1776.145)(689.1246, 26298.266)(689.55615, 8657.737)(669.5591, 24573.049)(670.…
1-Hexadec-9-enoyl-sn-glycerol3-phosphate-PAMDB001537	1.0159	0.898195	-1.95952	-2.57691	0.620779	0.4146	-1.43521	-3.23631	-1.6613	-0.4146	1.27073	2.13905	1-Hexadec-9-enoyl-sn-glycerol3-phosphate-PAMDB001537	1-Hexadec-9-enoyl-sn-glycerol3-phosphate-PAMDB001537 [ C19 H35 O7 P, tgt=77.48, overall=77.48 ]			(388.19888, 32435.314)(389.19147, 7751.2646)(430.86877, 5968.0386)(432.20084, 708.93335)(415.20316, 28627.67)(416.20566, 4880.7153)
D-Threonine-PAMDB001914	-0.254191	-0.255809	-0.384063	0.469695	0.00612164	0.143296	-0.00303364	0.00303364	-0.168256	0.901908	-2.79163	0.742696	D-Threonine-PAMDB001914	D-Threonine-PAMDB001914 [ C4 H9 N O3, tgt=64.58, overall=64.58 ]			(121.0624, 322.93)(103.05218, 8519.207)(104.05967, 5757.23)(119.0835, 552784.5)(120.08655, 36794.79)(124.0377, 47870.55)(125.0403, 862.67)
PG(14:0(3-OH)/16:0)-PAMDB004065	-17.2728	0.970858	0.476515	-17.1103	-17.3839	-17.096	-17.2619	-0.14105	0.14105	1.47311	1.07257	1.88773	PG(14:0(3-OH)/16:0)-PAMDB004065	PG(14:0(3-OH)/16:0)-PAMDB004065 [ C36H71O11P, tgt= ]			(694.4801, 252.81)(699.5013, 6275.69)(733.5179, 2757.89)(711.3514, 6983.5747)(712.49585, 965.435)
12-Diacyl-sn-glycerol(ditetradec-7-enoyln-C14:1)-PAMDB001517	0.227287	-1.48615	-0.501257	-0.165604	0.311724	-0.050787	-0.390026	0.050787	-0.664516	1.2247	1.35036	2.10706	12-Diacyl-sn-glycerol(ditetradec-7-enoyln-C14:1)-PAMDB001517	12-Diacyl-sn-glycerol(ditetradec-7-enoyln-C14:1)-PAMDB001517 [ C31 H56 O5, tgt=70.91, overall=70.91 ]			(509.20782, 1616.2561)(491.3987, 3589.103)(493.30267, 26837.879)(494.30643, 7887.2637)(495.17728, 62517.656)(496.18216, 17547.832)(496.4322, 223.63)(509.4101, 760.68)(493.41553, 14080.995)(494.9253, 27051.604)(495.93298, 17536.875)(496.4345, 3544.0)(509.44556, 1485.4474)(531.399, 761048.9)(532.4021, 236287.84)(533.40094, 54009.812)(534.4002, 6390.4033)(515.2239, 77769.055)(516.7865, 32121.139)(51…
Ubiquinone-0-PAMDB001302	-0.169678	17.6899	16.0798	-0.00716972	-0.280809	0.00716782	-0.158798	-0.093111	-0.0798264	0.751345	18.2674	0.720057	Ubiquinone-0-PAMDB001302	Ubiquinone-0-PAMDB001302 [ C9 H10 O4, tgt= ]			(186.07239, 15999.245)(165.05136, 1805.8151)(168.0619, 8244.84)(186.073, 57478.64)(168.0623, 6979.08)(182.07735, 10695.939)(210.05681, 44357.13)(187.033, 11379.63)
PG(15:0/10:0(3-OH))-PAMDB004075	4.47235	3.82219	1.52182	-0.310134	0.985864	0.796163	0.310134	-17.4167	-0.423114	-16.5723	-16.7205	-16.6036	PG(15:0/10:0(3-OH))-PAMDB004075	PG(15:0/10:0(3-OH))-PAMDB004075 [ C31 H61 O11 P, tgt=75.25, overall=75.25 ]			(642.42395, 99919.92)(643.42664, 32970.145)(644.42865, 3818.605)(625.3975, 24458.135)(626.4004, 6747.385)(627.4037, 456.99)(642.42334, 11727.579)(643.4261, 2196.285)(647.3784, 8070.211)(648.38165, 1365.2767)
Asn-Arg-Ala-Ile_BMDB62552	1.45346	0.451382	0.998886	1.34398	0.886002	-0.647852	-0.297279	-1.63462	-0.383802	0.297279	-19.58	-19.463	Asn-Arg-Ala-Ile_BMDB62552	Asn-Arg-Ala-Ile_BMDB62552 [ C19 H36 N8 O6, tgt=71.05, overall=71.05 ]			(472.30112, 115806.64)(473.3028, 12653.103)(474.3054, 904.64667)
PE(15:0/16:1(9Z))-PAMDB006225	-0.483542	-0.801514	-0.441837	0.0284328	-0.260174	-0.0619488	0.428246	0.276957	0.523794	0.728914	-0.0284328	0.213163	PE(15:0/16:1(9Z))-PAMDB006225	PE(15:0/16:1(9Z))-PAMDB006225 [ C36 H70 N O8 P, tgt=68.87, overall=68.87 ]			(676.4862, 20623.46)(677.4929, 6930.526)(678.4941, 3824.8767)(658.4963, 9718.027)(699.5246, 1366.3)(675.50616, 43419.336)(676.51013, 13335.505)(680.46783, 15523.678)(681.4703, 5109.992)
CDP-DG(15:0cyclo/10:0(3-OH))-PAMDB006794	-0.483354	-0.489774	-0.640405	0.358222	-0.081151	0.100593	0.081151	-0.198796	-0.148461	0.910613	0.584477	0.758096	CDP-DG(15:0cyclo/10:0(3-OH))-PAMDB006794	CDP-DG(15:0cyclo/10:0(3-OH))-PAMDB006794 [ C37 H65 N3 O16 P2, tgt=54.10, overall=54.10 ]			(851.38354, 167404.03)(852.3864, 74251.555)(853.38794, 14086.058)(854.3878, 230.82)
PS(18:1(9Z)/14:0)-PAMDB006269	20.2292	20.886	-1.17563	20.3332	20.4392	-0.670048	-0.836014	-0.770327	-0.757042	0.0741291	-0.0741272	17.0429	PS(18:1(9Z)/14:0)-PAMDB006269	PS(18:1(9Z)/14:0)-PAMDB006269 [ C38 H72 N O10 P, tgt=18.40, overall=18.40 ]			(738.4876, 1356.9)(740.5058, 169.37)(717.3094, 19506.035)(718.3118, 5972.5737)(718.5132, 167.02)(733.5253, 5479.84)
PG(12:0(3-OH)/14:0(3-OH))-PAMDB004044	3.90045	2.80742	-0.53191	-1.88881	0.246437	-0.74658	-18.4459	-18.3802	0.125149	1.4986	-0.125149	1.15515	PG(12:0(3-OH)/14:0(3-OH))-PAMDB004044	PG(12:0(3-OH)/14:0(3-OH))-PAMDB004044 [ C32 H63 O12 P, tgt=14.75, overall=14.75 ]			(688.4193, 18893.111)(689.422, 5020.57)(675.4081, 2880.907)
PG(12:0/10:0(3-OH))-PAMDB004053	-0.0403547	0.0176706	-0.302957	-0.521392	-0.383344	-0.138915	0.892104	-0.0176706	0.469525	1.45491	0.749696	1.11184	PG(12:0/10:0(3-OH))-PAMDB004053	PG(12:0/10:0(3-OH))-PAMDB004053 [ C28 H55 O11 P, tgt=79.69, overall=79.69 ]			(599.3798, 142055.36)(600.3823, 36589.105)(601.38385, 4018.0208)(603.3275, 826.942)
PE(12:0(3-OH)/19:0cycv8c)-PAMDB003859	-22.339	0.649372	0.0782738	0.654217	-0.055069	-22.1621	-22.3281	-0.372396	-0.493036	0.314081	0.168108	0.055069	PE(12:0(3-OH)/19:0cycv8c)-PAMDB003859	PE(12:0(3-OH)/19:0cycv8c)-PAMDB003859 [ C36H70NO9P, tgt= ]			(694.48126, 269.27)(675.4837, 1745.582)(674.4916, 1835.49)(709.51447, 27347.695)(710.51685, 5663.1885)
Cholicacid-PAMDB001819	0.773417	1.44461	-0.0228052	0.507379	0.0982046	0.0228052	-20.8773	-0.0424147	-0.22416	-19.9672	-1.124	0.656392	Cholicacid-PAMDB001819	Cholicacid-PAMDB001819 [ C24 H40 O5, tgt=39.94, overall=39.94 ]			(391.27628, 47877.63)(392.27917, 8052.544)(393.29047, 645549.5)(394.2934, 132901.77)(395.29614, 12532.379)(395.30728, 3725.936)(432.33536, 24588.236)(408.76062, 97848.78)(410.32706, 56157.344)(413.25763, 29118.605)(414.26035, 5227.695)
PE(18:1(9Z)/14:0)-PAMDB006239	-2.27837	-1.12275	1.72389	2.81196	1.07598	-21.0459	2.76707	2.70729	0.91389	-20.3017	-20.4499	-0.91389	PE(18:1(9Z)/14:0)-PAMDB006239	PE(18:1(9Z)/14:0)-PAMDB006239 [ C37 H72 N O8 P, tgt=52.49, overall=52.49 ]			(689.98596, 6708.81)(690.4833, 2250.19)(675.8234, 9314.354)(677.504, 3160.8252)(690.493, 145.3)(674.5031, 13143.329)(675.675, 3969.332)(676.67834, 9102.69)(677.3168, 2645.5479)(677.51886, 11326.82)(678.52106, 3098.8867)(709.53357, 18325.473)(712.03796, 12052.402)(713.05, 17268.67)(712.5439, 3806.4)(713.5567, 14878.42)(694.5498, 2149.36)(716.0067, 5874.689)(717.51166, 2246.5017)(718.5253, 2381.746…
13Z-Octadecenoic acid_BMDB62538	0.673344	0.657192	-0.534178	-0.341509	0.00588226	-0.00588226	-0.446711	-29.1644	-0.447968	0.494982	0.14739	0.612705	13Z-Octadecenoic acid_BMDB62538	13Z-Octadecenoic acid_BMDB62538 [ C18 H34 O2, tgt=92.28, overall=92.28 ]			(265.2484, 593657.94)(266.2513, 98368.05)(267.25427, 5525.8926)(268.2583, 30389.469)(269.26117, 4040.67)(282.27502, 1.1418404E7)(283.27783, 2470817.2)(284.28143, 241057.31)(285.28415, 11129.535)
Methionyl-Asparagine_BMDB62252	0.557162	0.257064	-0.00217724	0.259574	-0.391845	0.19819	0.00217724	-0.958138	-0.0255423	0.677127	-16.8169	-16.6999	Methionyl-Asparagine_BMDB62252	Methionyl-Asparagine_BMDB62252 [ C9 H17 N3 O4 S, tgt=75.31, overall=75.31 ]			(263.0863, 7556.04)(265.1018, 9082.631)(267.11813, 151279.53)(268.12085, 14283.787)
Isocitricacid-PAMDB000604	-0.0429115	3.47925	3.288	-17.951	-18.2247	0.906315	0.0429115	2.00931	2.50661	-17.1925	-17.3408	-17.2238	Isocitricacid-PAMDB000604	Isocitricacid-PAMDB000604 [ C6 H8 O7, tgt=43.47, overall=43.47 ]			(175.01619, 17694.09)(193.03044, 3874.8035)(210.05661, 13867.612)(211.05975, 388.815)(215.44235, 16202.124)(217.5182, 2327.1401)
DG(18:1(9Z)/0:0/18:1(11Z))-PAMDB006465	24.8984	24.0727	-0.498417	-0.00716972	-0.280809	0.00716782	-0.158798	-0.093111	-0.0798264	0.751345	23.4414	0.720057	DG(18:1(9Z)/0:0/18:1(11Z))-PAMDB006465	DG(18:1(9Z)/0:0/18:1(11Z))-PAMDB006465 [ C39 H72 O5, tgt=34.69, overall=34.69 ]			(625.5742, 18463.03)(626.5768, 5995.15)(603.5174, 64889.25)(604.5235, 14714.08)(638.5687, 4160.66)(625.5756, 937.81)(643.52655, 8208.475)(644.5307, 4159.79)(628.5393, 53107.53)(629.54193, 16587.895)(630.54395, 1202.245)
Geranyldiphosphate-PAMDB003527	0.91599	0.280416	0.0523558	0.906726	0.553922	0.737452	-1.2108	-0.441972	-17.5082	-0.386748	-0.23799	-0.0523558	Geranyldiphosphate-PAMDB003527	Geranyldiphosphate-PAMDB003527 [ C40 H68 O7 P2, tgt=34.35, overall=34.35 ]			(750.4412, 22034.412)(751.4426, 8213.871)
DG(19:0cycv8c/17:0cycw7c/0:0)-PAMDB006940	24.8984	24.0727	-0.498417	-0.00716972	-0.280809	0.00716782	-0.158798	-0.093111	-0.0798264	0.751345	23.4414	0.720057	DG(19:0cycv8c/17:0cycw7c/0:0)-PAMDB006940	DG(19:0cycv8c/17:0cycw7c/0:0)-PAMDB006940 [ C39 H72 O5, tgt=34.69, overall=34.69 ]			(625.5742, 18463.03)(626.5768, 5995.15)(603.5174, 64889.25)(604.5235, 14714.08)(638.5687, 4160.66)(625.5756, 937.81)(643.52655, 8208.475)(644.5307, 4159.79)(628.5393, 53107.53)(629.54193, 16587.895)(630.54395, 1202.245)
N-[(3S)-2-Oxotetrahydro-3-furanyl]dodecanamide-PAMDB100078	0.235868	-0.168282	-0.300667	0.379786	0.0711784	0.395105	-0.0711784	0.802271	-1.99687	0.731882	-19.964	-19.847	N-[(3S)-2-Oxotetrahydro-3-furanyl]dodecanamide-PAMDB100078	N-[(3S)-2-Oxotetrahydro-3-furanyl]dodecanamide-PAMDB100078 [ C16 H29 N O3, tgt=67.14, overall=67.14 ]			(265.70758, 2227.75)(268.22174, 14829.978)(269.2243, 827.208)(308.01123, 36261.95)(309.0133, 3748.2622)(290.09213, 20909.809)(291.32776, 6790.8237)(292.8045, 1570.4761)(293.2045, 1111.01)
Caproic acid_BMDB00535	-0.00141716	-0.135527	-0.321266	0.00141716	-0.289625	-0.0719643	0.0340538	-0.509632	0.0649319	0.901108	0.402132	0.788616	Caproic acid_BMDB00535	Caproic acid_BMDB00535 [ C6 H12 O2, tgt=86.67, overall=86.67 ]			(102.089355, 730.81)(116.104576, 262.27)(121.06263, 139276.39)(122.065834, 7756.556)(123.0774, 189.87)
1-Acyl-sn-glycero-3-phosphoethanolamine(N-C14:1)-PAMDB001524	-0.533291	16.6534	-0.86203	17.7884	18.0771	-0.356445	-0.522411	-0.456724	-0.443439	0.387732	18.4108	0.356443	1-Acyl-sn-glycero-3-phosphoethanolamine(N-C14:1)-PAMDB001524	1-Acyl-sn-glycero-3-phosphoethanolamine(N-C14:1)-PAMDB001524 [ C19H35NO7P, tgt= ]			(402.2038, 15279.09)(403.2067, 788.99)(420.22913, 22088.955)(421.23175, 3443.0352)
PS(15:0cyclo/10:0(3-OH))-PAMDB003983	0.326885	0.0510368	-0.18046	-0.0198097	-0.0996971	0.033226	0.184677	-0.962257	0.143143	-23.6234	0.0198097	-23.6547	PS(15:0cyclo/10:0(3-OH))-PAMDB003983	PS(15:0cyclo/10:0(3-OH))-PAMDB003983 [ C31 H56 N O11 P, tgt=48.77, overall=48.77 ]			(652.39575, 540.07495)(653.3995, 98.78)(654.3209, 379301.47)(655.32355, 114125.06)(656.3249, 14700.014)(657.3213, 710.19)
PS(18:1(11Z)/16:1(9Z))-PAMDB001470	21.4702	21.9597	-1.15999	21.7291	21.6919	-0.654404	-0.82037	-0.754683	-0.741398	0.0897732	-0.0584831	0.058485	PS(18:1(11Z)/16:1(9Z))-PAMDB001470	PS(18:1(11Z)/16:1(9Z))-PAMDB001470 [ C40 H74 N O10 P, tgt=20.27, overall=20.27 ]			(764.0016, 2805.145)(764.5033, 3506.35)(742.5227, 34755.594)(743.5254, 12374.925)(744.5292, 1034.845)
3-Hydroxymyristicacid-PAMDB001888	18.9381	18.6283	18.6245	-0.74287	-1.01651	-0.728533	19.392	18.0501	-0.815527	0.0156441	-0.132612	-0.0156441	3-Hydroxymyristicacid-PAMDB001888	3-Hydroxymyristicacid-PAMDB001888 [ C14 H28 O3, tgt=72.53, overall=72.53 ]			(249.21606, 4545.7573)(227.19624, 27152.463)(228.19922, 2758.9375)(231.20605, 871.06995)(266.0439, 59901.727)(267.24597, 8998.035)(249.17831, 6785.015)
karalicin-PAMDB100000	-1.67052	0.156701	-0.170115	0.164269	-21.9042	-2.21082	0.156602	-0.156602	0.412461	1.01058	0.603848	-0.700852	karalicin-PAMDB100000	karalicin-PAMDB100000 [ C14 H20 O6, tgt=73.09, overall=73.09 ]			(267.11823, 94154.71)(268.12103, 8021.7524)(267.1174, 100562.45)(268.1201, 9226.74)(302.1603, 377.16)
PS(17:0cycw7c/15:0cyclo)-PAMDB006729	-20.5185	-0.086072	0.251563	0.232957	-0.090045	0.383265	0.086072	-1.00782	-0.625756	-19.5975	0.589427	1.77671	PS(17:0cycw7c/15:0cyclo)-PAMDB006729	PS(17:0cycw7c/15:0cyclo)-PAMDB006729 [ C38H68NO10P, tgt= ]			(731.46893, 13318.4795)(732.4718, 3250.396)(717.444, 336.435)
PG(12:0/12:0(3-OH))-PAMDB004054	19.0301	19.4104	18.6038	-0.312298	-0.585938	-0.29796	-0.463926	-0.398239	-0.384954	0.446217	0.29796	0.414928	PG(12:0/12:0(3-OH))-PAMDB004054	PG(12:0/12:0(3-OH))-PAMDB004054 [ C30 H59 O11 P, tgt=39.06, overall=39.06 ]			(644.42865, 4355.4)(626.4005, 12244.133)(627.4037, 495.695)(651.3652, 177.45)
3-Oxo-N-(2-oxotetrahydro-3-furanyl)butanamide-PAMDB100080	-2.03372	-1.60356	1.81071	-3.08414	-1.24426	1.24426	-1.80882	1.59285	1.94252	-2.43331	3.86439	2.26788	3-Oxo-N-(2-oxotetrahydro-3-furanyl)butanamide-PAMDB100080	3-Oxo-N-(2-oxotetrahydro-3-furanyl)butanamide-PAMDB100080 [ C8 H11 N O4, tgt=42.09, overall=42.09 ]			(185.56737, 239268.11)(186.31705, 66482.36)(187.0609, 58761.402)(168.7626, 3930.7844)(169.0663, 3526.37)(187.07674, 52353.754)(188.0756, 1508.95)
DG(10:0/12:0/0:0)-PAMDB003632	-22.3213	2.10086	1.43505	-22.1588	-0.355096	2.26999	0.355096	4.46748	-22.2315	4.23587	-21.5486	-21.4316	DG(10:0/12:0/0:0)-PAMDB003632	DG(10:0/12:0/0:0)-PAMDB003632 [ C25H48O5, tgt= ]			(429.3636, 381.2125)(410.32715, 49916.227)(411.33963, 443679.8)(412.3425, 100472.9)(413.3445, 9094.565)(447.39478, 105.71)(451.3307, 805.09)(435.05045, 9050.842)(437.01614, 101018.56)(438.3564, 33101.773)
DG(12:0/16:0/0:0)-PAMDB003644	-1.41117	-2.4348	0.0582428	-23.431	1.63198	-0.0582428	0.508856	0.12331	-0.129759	3.34768	0.642914	-1.08233	DG(12:0/16:0/0:0)-PAMDB003644	DG(12:0/16:0/0:0)-PAMDB003644 [ C31 H60 O5, tgt=45.39, overall=45.39 ]			(494.41882, 8531.014)(495.43134, 73688.05)(496.43423, 17552.883)(497.43658, 2293.38)(534.6793, 17371.271)(535.7049, 5836.862)(536.4906, 1760.7125)(535.4336, 1021.89)(518.7008, 66688.51)(519.70306, 9137.191)(519.9314, 2226.52)
1-Octadecanoyl-sn-glycerol3-phosphate-PAMDB001540	-0.611413	-0.215419	0.0871611	-0.200898	-0.545106	-0.0871611	0.368237	0.432509	0.508121	0.519425	-0.243398	0.585143	1-Octadecanoyl-sn-glycerol3-phosphate-PAMDB001540	1-Octadecanoyl-sn-glycerol3-phosphate-PAMDB001540 [ C21 H41 O7 P, tgt=51.44, overall=51.44 ]			(454.28366, 18882.092)(455.28632, 1940.4636)(460.26147, 486742.84)(461.26425, 119769.34)(462.266, 12316.758)(446.24475, 22954.697)
Aspartyl-Valine_BMDB62228	0.57678	-0.021225	-0.355221	0.628582	0.317064	0.467428	-1.22406	0.134352	-1.2191	-0.384539	-0.590538	0.021225	Aspartyl-Valine_BMDB62228	Aspartyl-Valine_BMDB62228 [ C9 H16 N2 O5, tgt=70.22, overall=70.22 ]			(250.13701, 76279.33)(251.13972, 5810.4116)(236.13708, 51487.19)(237.14067, 6519.2065)
DG(18:1(9Z)/16:0/0:0)-PAMDB003698	0.541729	0.0660953	-0.32855	-0.0319977	0.0319977	0.125782	-20.5274	0.125782	-20.4484	0.564198	-19.7655	-0.174486	DG(18:1(9Z)/16:0/0:0)-PAMDB003698	DG(18:1(9Z)/16:0/0:0)-PAMDB003698 [ C37 H70 O5, tgt=86.88, overall=86.88 ]			(595.5277, 3053.7446)(578.30383, 1318.0701)(617.51105, 60465.168)(618.51355, 17875.205)(619.5129, 1998.7067)(601.00995, 15267.578)(601.5102, 4220.9062)(603.52246, 593.6367)
Methylcysteine_BMDB62213	17.4983	16.2188	-0.803545	-0.312298	-0.585938	-0.29796	16.7599	-0.398239	-0.384954	0.446217	0.29796	0.414928	Methylcysteine_BMDB62213	Methylcysteine_BMDB62213 [ C4 H9 N O2 S, tgt=44.46, overall=44.46 ]			(137.04245, 1140.8049)(136.0589, 9472.7)(158.02393, 9129.09)
(R)-3-Hydroxy-3-methyl-2-oxopentanoate-PAMDB000863	0.269365	0.256516	-0.0997582	0.157345	-0.178732	-0.00394058	0.00394058	-17.39	0.0982056	0.840956	-16.6938	-16.5769	(R)-3-Hydroxy-3-methyl-2-oxopentanoate-PAMDB000863	(R)-3-Hydroxy-3-methyl-2-oxopentanoate-PAMDB000863 [ C6 H10 O4, tgt=34.82, overall=34.82 ]			(129.05151, 1887.7626)(147.0622, 7527.5684)(149.0929, 938.76)
PS(19:0cycv8c/15:0cyclo)-PAMDB006740	-0.169678	19.1145	-0.498417	-0.00716972	19.4315	0.00716782	-0.158798	-0.093111	-0.0798264	0.751345	0.603088	0.720057	PS(19:0cycv8c/15:0cyclo)-PAMDB006740	PS(19:0cycv8c/15:0cyclo)-PAMDB006740 [ C40 H72 N O10 P, tgt=17.15, overall=17.15 ]			(740.50616, 11978.1)(741.5091, 2493.155)
L-Alanine-PAMDB000063	0.593251	-0.263701	-0.0145559	0.672793	0.223514	0.311816	-0.91915	-0.225999	-1.00128	0.0145559	-0.117753	0.140693	L-Alanine-PAMDB000063	L-Alanine-PAMDB000063 [ C3 H7 N O2, tgt=59.11, overall=59.11 ]			(107.08362, 72683.336)(108.086555, 3063.5576)
PG(10:0(3-OH)/12:0)-PAMDB004023	-0.0403547	0.0176706	-0.302957	-0.521392	-0.383344	-0.138915	0.892104	-0.0176706	0.469525	1.45491	0.749696	1.11184	PG(10:0(3-OH)/12:0)-PAMDB004023	PG(10:0(3-OH)/12:0)-PAMDB004023 [ C28 H55 O11 P, tgt=79.69, overall=79.69 ]			(599.3798, 142055.36)(600.3823, 36589.105)(601.38385, 4018.0208)(603.3275, 826.942)
2-Demethylmenaquinol8-PAMDB001563	-0.905378	20.1183	23.7618	-0.74287	-1.01651	-0.728533	21.1743	20.8786	20.5029	0.0156441	-0.132612	-0.0156441	2-Demethylmenaquinol8-PAMDB001563	2-Demethylmenaquinol8-PAMDB001563 [ C50H72O2, tgt= ]			(705.5528, 3670.9268)(686.5286, 50022.7)(687.5332, 12240.397)(688.5437, 2234.17)(706.06885, 14598.965)(707.5852, 8426.24)(708.5914, 563.88)(726.6105, 7502.83)(706.0812, 85412.31)(707.5888, 41016.33)(708.596, 15079.88)(709.6008, 717.58)(731.56836, 12761.835)(732.5738, 4548.353)(733.5773, 281.42)(711.5402, 34172.164)(712.5432, 12185.258)(713.54834, 1155.4551)(715.5724, 64280.316)
N2-succinyl-L-arginine-PAMDB006307	-18.0195	-0.638524	-18.3483	-0.207675	-0.25557	-17.8427	0.878261	0.445806	0.664319	1.33664	0.207675	1.35417	N2-succinyl-L-arginine-PAMDB006307	N2-succinyl-L-arginine-PAMDB006307 [ C10H17N4O5, tgt= ]			(255.11551, 12377.083)(260.121, 476.8)(293.16647, 1236.7839)(276.15146, 3057.2354)(283.11212, 862.37)
1-Acyl-sn-glycero-3-phosphoglycerol(N-C18:1)-PAMDB001535	0.530129	0.310418	0.354016	-0.366399	-0.26024	-0.378777	0.26024	-18.5442	-0.294065	1.62322	-17.848	0.922105	1-Acyl-sn-glycero-3-phosphoglycerol(N-C18:1)-PAMDB001535	1-Acyl-sn-glycero-3-phosphoglycerol(N-C18:1)-PAMDB001535 [ C24 H46 O9 P, tgt=75.05, overall=75.05 ]			(532.2757, 17967.553)(533.2781, 2106.186)(534.27405, 1149.266)
6-deoxy-6-sulfo-D-gluconicacid-PAMDB100032	-0.831249	18.5666	17.8248	-0.668741	-0.942381	-0.654404	-0.82037	17.3471	17.7514	0.0897732	-0.0584831	0.058485	6-deoxy-6-sulfo-D-gluconicacid-PAMDB100032	6-deoxy-6-sulfo-D-gluconicacid-PAMDB100032 [ C6 H12 O9 S, tgt=50.22, overall=50.22 ]			(261.03217, 2155.51)(260.04822, 28408.873)(261.54883, 695.8)(262.0468, 497.13)(283.01324, 1107.245)
L-Pipecolic acid_BMDB00716	-18.3987	0.981005	0.514164	1.15582	0.817993	0.946117	-0.920425	0.567955	-0.514164	-17.4777	-17.6259	-17.5089	L-Pipecolic acid_BMDB00716	L-Pipecolic acid_BMDB00716 [ C6H11NO2, tgt= ]			(130.83264, 4677.1484)(112.07295, 580.375)(147.11346, 11022.849)
PGP(12:0(3-OH)/10:0)-PAMDB006547	0.349423	-0.127257	3.33642	3.55506	-0.400006	-0.339084	-0.746964	3.11344	-0.976924	-0.290065	2.44031	0.127257	PGP(12:0(3-OH)/10:0)-PAMDB006547	PGP(12:0(3-OH)/10:0)-PAMDB006547 [ C28 H56 O14 P2, tgt=88.93, overall=88.93 ]			(682.351, 70946.56)(683.35345, 19622.76)(684.3554, 1520.641)
isethionate-PAMDB006372	8.17613	10.2166	10.2056	11.2767	-9.20829	-8.92031	-9.08627	-9.02059	11.225	-8.17613	9.8262	-8.20742	isethionate-PAMDB006372	isethionate-PAMDB006372 [ C2 H5 O4 S, tgt=60.52, overall=60.52 ]			(129.9911, 4582.25)(111.98196, 11710.861)(128.99678, 7407.936)(112.9876, 5461.74)(147.02162, 9511.042)(130.0188, 688.1767)(147.9784, 3376.4243)(129.9681, 11282.019)
L-Methionine_BMDB00696	2.96807	2.26163	2.11518	-17.3113	-0.710594	-17.297	-17.4629	2.31362	1.82687	-16.5528	0.710594	-16.5841	L-Methionine_BMDB00696	L-Methionine_BMDB00696 [ C5 H11 N O2 S, tgt=44.75, overall=44.75 ]			(150.0526, 26012.277)(152.05373, 5021.048)(167.0858, 153.36)(172.03635, 683.8)(158.0244, 2730.5366)
9E-tetradecenoic acid_BMDB62535	0.221112	-0.0899496	-0.359456	0.186137	-0.0421095	0.171271	-0.42822	-0.10632	-0.487468	0.455951	0.0421095	0.520986	9E-tetradecenoic acid_BMDB62535	9E-tetradecenoic acid_BMDB62535 [ C14 H26 O2, tgt=82.20, overall=82.20 ]			(209.18584, 4946.0977)(212.19685, 29168.814)(213.19978, 1420.5989)(247.23799, 397644.4)(248.24089, 61228.715)(249.24359, 1560.4259)(226.21222, 37381.887)(227.21509, 2734.0833)(228.22725, 357.99667)
PG(19:iso/10:0)-PAMDB004103	1.01283	0.457102	-0.46402	0.0889015	-0.0889015	0.123531	-0.238672	-0.32605	-0.555407	0.352478	-6.49632	0.919695	PG(19:iso/10:0)-PAMDB004103	PG(19:iso/10:0)-PAMDB004103 [ C35 H69 O10 P, tgt=57.32, overall=57.32 ]			(680.467, 21973.541)(681.46985, 7583.672)(663.44257, 1494436.9)(664.4461, 666728.2)(665.44904, 152590.5)(666.4506, 14464.966)(701.3158, 5025.032)(702.14355, 7686.8325)(702.5237, 11441.658)(702.521, 10412.17)(680.9748, 11865.07)(681.4704, 7269.24)(685.4229, 51931.02)(686.426, 18087.287)(687.4276, 2276.9465)
Dodecanoate(N-C12:0)-PAMDB001617	-20.4904	-0.208007	-0.171945	0.55701	0.171945	0.407063	-2.99448	-3.52243	-3.44566	0.19793	0.71614	0.726981	Dodecanoate(N-C12:0)-PAMDB001617	Dodecanoate(N-C12:0)-PAMDB001617 [ C12H23O2, tgt= ]			(200.8857, 3247.5786)(181.15503, 6483.58)(219.2067, 1646.02)(200.1978, 238871.92)(201.2008, 24422.947)(202.2033, 2285.5)(222.1563, 98936.89)(223.15898, 7915.0674)
6-deoxy-6-sulfoglucono-15-lactone-PAMDB100022	-0.831249	18.4397	17.693	-0.668741	-0.942381	-0.654404	-0.82037	17.332	17.7384	0.0897732	-0.0584831	0.058485	6-deoxy-6-sulfoglucono-15-lactone-PAMDB100022	6-deoxy-6-sulfoglucono-15-lactone-PAMDB100022 [ C6 H10 O8 S, tgt=50.22, overall=50.22 ]			(260.04822, 32575.445)(261.05096, 1035.6525)(262.0467, 603.3)
DG(14:0(3-OH)/17:0cycw7c/0:0)-PAMDB006890	-0.905378	24.642	-1.23412	23.8852	24.5187	23.974	-0.894499	-0.828812	23.9336	0.0156441	-0.132612	-0.0156441	DG(14:0(3-OH)/17:0cycw7c/0:0)-PAMDB006890	DG(14:0(3-OH)/17:0cycw7c/0:0)-PAMDB006890 [ C34H64O6, tgt= ]			(570.4626, 458081.47)(571.46545, 151237.45)(572.4753, 108815.555)(573.4789, 32702.625)(574.482, 3296.2825)(572.4767, 38356.11)(573.479, 12328.41)(574.4757, 2538.81)(575.4916, 82115.87)(586.4898, 3599.14)(594.86316, 4970.6396)(595.86615, 965.42596)(596.47736, 141536.0)(597.48, 45054.684)
PE(19:0cycv8c/15:0cyclo)-PAMDB006694	1.5334	-0.224635	-1.83074	-19.3594	4.37516	-19.3451	-19.511	-0.882234	0.224635	5.07224	1.82266	3.73239	PE(19:0cycv8c/15:0cyclo)-PAMDB006694	PE(19:0cycv8c/15:0cyclo)-PAMDB006694 [ C39 H74 N O8 P, tgt=64.14, overall=64.14 ]			(718.5207, 5702.0566)(719.02576, 3469.81)(720.0226, 3380.645)(721.5189, 941.68)(703.5142, 57.67)(717.8532, 7102.6035)(719.5156, 4751.25)(721.5176, 1366.35)(700.2628, 2930.8477)(700.8481, 5851.3535)(701.85504, 13932.993)(702.861, 7247.9766)(703.86884, 18809.244)(704.53625, 9225.59)(735.5534, 8023.929)(736.8048, 2372.0176)(743.42004, 26596.29)(743.5256, 2651.31)(744.5384, 4914.14)(721.4923, 9818.51…
PS(19:iso/15:0cyclo)-PAMDB004014	21.4702	21.9597	-1.15999	21.7291	21.6919	-0.654404	-0.82037	-0.754683	-0.741398	0.0897732	-0.0584831	0.058485	PS(19:iso/15:0cyclo)-PAMDB004014	PS(19:iso/15:0cyclo)-PAMDB004014 [ C40 H74 N O10 P, tgt=20.27, overall=20.27 ]			(764.0016, 2805.145)(764.5033, 3506.35)(742.5227, 34755.594)(743.5254, 12374.925)(744.5292, 1034.845)
alpha-D-Glucosamine1-phosphate-PAMDB002052	-0.0987444	2.57205	1.82574	-16.5367	-16.8104	0.0987444	-0.234799	1.46526	1.87123	-15.7782	1.31007	-15.8095	alpha-D-Glucosamine1-phosphate-PAMDB002052	alpha-D-Glucosamine1-phosphate-PAMDB002052 [ C6 H14 N O8 P, tgt=83.67, overall=83.67 ]			(247.0521, 939.12)(280.0869, 49680.54)(281.0895, 3096.8674)(260.0482, 9517.37)
PG(19:0/17:0)-PAMDB001449	16.8753	16.2212	-1.15999	-0.668741	-0.942381	19.0145	-0.82037	19.2017	-0.741398	20.743	-0.0584831	0.058485	PG(19:0/17:0)-PAMDB001449	PG(19:0/17:0)-PAMDB001449 [ C42 H83 O10 P, tgt=36.40, overall=36.40 ]			(784.5827, 10124.91)(761.32495, 18663.797)(762.328, 5729.0674)(762.5826, 1660.17)(763.591, 41179.96)(764.5938, 15999.71)(765.5961, 728.35)(784.2324, 8029.904)(785.23517, 2090.22)(786.5799, 938.77)
PS(10:0(3-OH)/15:0cyclo)-PAMDB003932	0.366829	0.0909805	-0.140516	-0.587955	-0.0597534	0.0731697	0.224621	-0.922314	0.183086	-23.5835	0.0597534	-23.6148	PS(10:0(3-OH)/15:0cyclo)-PAMDB003932	PS(10:0(3-OH)/15:0cyclo)-PAMDB003932 [ C31 H56 N O11 P, tgt=48.77, overall=48.77 ]			(652.39575, 540.07495)(653.3995, 98.78)(654.3209, 388890.53)(655.32355, 117688.086)(656.3249, 15193.058)(657.3213, 710.19)
N-Hydroxy-l-tyrosine_BMDB62285	18.2966	20.9964	19.7586	18.6672	-1.01651	-0.728533	-0.894499	-0.828812	-0.815527	0.0156441	20.7601	-0.0156441	N-Hydroxy-l-tyrosine_BMDB62285	N-Hydroxy-l-tyrosine_BMDB62285 [ C9 H11 N O4, tgt=41.98, overall=41.98 ]			(180.0623, 91267.87)(181.06537, 7642.2935)(202.04347, 5334.67)(197.09326, 1319.3033)
sn-glycero-3-phosphocholine-PAMDB006365	-0.815277	2.78754	2.97885	-0.290913	-22.0909	0.831181	-0.0617199	2.14215	2.56457	-2.58752	0.0617199	-21.09	sn-glycero-3-phosphocholine-PAMDB006365	sn-glycero-3-phosphocholine-PAMDB006365 [ C8 H20 N O6 P, tgt=82.25, overall=82.25 ]			(280.0865, 15137.545)(281.0897, 1863.39)(258.10562, 887211.6)(259.10855, 69003.55)(260.1095, 9774.659)
4-Acetamidobutanoic acid_BMDB03681	0.42091	-0.141281	-0.333416	0.226442	-0.823811	0.199394	-20.0161	-0.200657	-19.9372	0.433434	0.141281	0.418238	4-Acetamidobutanoic acid_BMDB03681	4-Acetamidobutanoic acid_BMDB03681 [ C6 H11 N O3, tgt=83.41, overall=83.41 ]			(130.47147, 58976.344)(132.0743, 124151.69)(151.09322, 11307.756)(171.57129, 18589.928)(150.0523, 33961.48)(151.05498, 973.3217)
D-2-Hydroxyglutaricacid-PAMDB000155	0.241686	2.26329	1.72281	-0.279648	-0.989718	0.483755	-0.241686	0.724886	-1.63469	0.407782	-1.07007	-17.5696	D-2-Hydroxyglutaricacid-PAMDB000155	D-2-Hydroxyglutaricacid-PAMDB000155 [ C5 H8 O5, tgt=70.99, overall=70.99 ]			(150.45256, 17309.613)(152.0534, 721.9)(166.25124, 49956.934)(167.40633, 3217.0537)(148.05728, 6631.063)(157.02107, 42175.01)(158.02429, 4385.965)
DL-Acetylcarnitine_BMDB62647	-0.94493	2.82436	1.92611	-1.46595	-2.32195	-0.0907583	-0.264564	0.928287	1.60715	-20.2406	2.9155	0.0907583	DL-Acetylcarnitine_BMDB62647	DL-Acetylcarnitine_BMDB62647 [ C9 H17 N O4, tgt=70.89, overall=70.89 ]			(204.11938, 205223.8)(205.12236, 14461.281)(206.12492, 1986.1733)(186.1082, 452.27)(208.15013, 13015.809)
Civetic acid_BMDB62593	0.263473	0.0517702	-0.206351	0.414559	0.221183	0.447019	-1.05185	-0.0517702	-1.16733	-0.189544	-0.19604	0.172925	Civetic acid_BMDB62593	Civetic acid_BMDB62593 [ C17 H32 O2, tgt=82.32, overall=82.32 ]			(251.2326, 146877.42)(252.23497, 20315.803)(294.23788, 241067.7)(295.2405, 37312.05)(296.25262, 6449375.0)(276.22656, 2927.3826)(278.24194, 30331.344)
Sn-Glycerol-1-phosphate-PAMDB001409	0.00381565	-0.240186	-0.206889	-0.366996	0.0539389	0.0168867	-0.00381565	-0.0103292	-0.060914	0.873414	1.23075	0.0127459	Sn-Glycerol-1-phosphate-PAMDB001409	Sn-Glycerol-1-phosphate-PAMDB001409 [ C3 H9 O6 P, tgt=47.82, overall=47.82 ]			(172.01434, 15180.831)(173.02118, 739.916)(156.007, 613.472)(173.02129, 4585.8315)(172.0366, 34.56)
tetrahydropteroylmono-L-glutamate-PAMDB006378	0.199714	0.0736608	-0.119962	-0.0736608	-0.174127	-0.312966	0.349635	-1.14835	-1.41573	1.16088	0.542867	0.314412	tetrahydropteroylmono-L-glutamate-PAMDB006378	tetrahydropteroylmono-L-glutamate-PAMDB006378 [ C19 H21 N7 O6, tgt=58.90, overall=58.90 ]			(425.14914, 172049.89)(426.1517, 27752.455)(427.15366, 1559.8701)
3-Methylhistidine_BMDB00479	1.22868	0.630087	-0.681559	0.930748	0.354424	0.274561	0.104136	-0.104136	-0.644739	-0.589766	-17.7791	-0.739204	3-Methylhistidine_BMDB00479	3-Methylhistidine_BMDB00479 [ C7 H11 N3 O2, tgt=51.95, overall=51.95 ]			(169.08229, 7680.3413)(170.093, 497.13)(151.07195, 18425.857)(152.0751, 232.25)(170.9535, 5448.3584)(153.08778, 34242.2)(187.54778, 39140.793)(189.12776, 4877.86)(170.11456, 277774.62)(171.61858, 1255.1975)(193.47885, 4301.9756)(177.06676, 6177.983)
Octadecanoyl-phosphate(n-C18:1)-PAMDB001667	0.724406	0.154428	0.2466	0.899871	0.372392	0.676833	-21.6131	-0.154428	-21.5342	-20.703	-20.8512	-20.7343	Octadecanoyl-phosphate(n-C18:1)-PAMDB001667	Octadecanoyl-phosphate(n-C18:1)-PAMDB001667 [ C18 H33 O5 P, tgt=51.68, overall=51.68 ]			(361.20337, 270855.66)(362.2059, 40129.94)(363.20792, 2604.8684)
PE(14:0(3-OH)/14:0)-PAMDB003869	0.654247	-0.444405	-0.13797	0.682629	-0.0636597	0.0636597	-0.461355	-0.403307	-0.682459	0.333439	0.138075	0.457472	PE(14:0(3-OH)/14:0)-PAMDB003869	PE(14:0(3-OH)/14:0)-PAMDB003869 [ C33 H66 N O9 P, tgt=65.01, overall=65.01 ]			(658.4636, 594.25)(634.4405, 34261.16)(635.4431, 8722.946)(636.4497, 394.28)(654.4809, 1065.245)(678.13055, 16606.67)(679.26843, 11362.755)(679.468, 9031.49)
DG(19:1(9Z)/18:0/0:0)-PAMDB003709	-22.3824	-0.895996	1.4035	2.55202	-1.24298	1.81793	0.895996	1.14849	1.20184	-21.4614	-21.6096	-21.4927	DG(19:1(9Z)/18:0/0:0)-PAMDB003709	DG(19:1(9Z)/18:0/0:0)-PAMDB003709 [ C40 H76 O5, tgt= ]			(659.5767, 205.45)(642.55206, 90347.766)(643.55225, 30288.098)(644.5496, 6474.2964)
PS(16:1(9Z)/18:1(9Z))-PAMDB006264	21.4702	21.9597	-1.15999	21.7291	21.6919	-0.654404	-0.82037	-0.754683	-0.741398	0.0897732	-0.0584831	0.058485	PS(16:1(9Z)/18:1(9Z))-PAMDB006264	PS(16:1(9Z)/18:1(9Z))-PAMDB006264 [ C40 H74 N O10 P, tgt=20.27, overall=20.27 ]			(764.0016, 2805.145)(764.5033, 3506.35)(742.5227, 34755.594)(743.5254, 12374.925)(744.5292, 1034.845)
PS(16:0/10:0(3-OH))-PAMDB003987	10.2384	9.77438	9.71506	-8.66798	8.05598	-8.65365	8.50859	-8.75393	7.90947	-7.90947	-8.05773	-7.94076	PS(16:0/10:0(3-OH))-PAMDB003987	PS(16:0/10:0(3-OH))-PAMDB003987 [ C32 H60 N O11 P, tgt=61.77, overall=61.77 ]			(647.37866, 10765.544)(648.38165, 1574.8334)
Ureidosuccinicacid-PAMDB000189	0.192569	2.37482	1.24226	0.684541	-17.4224	-0.0531721	-17.3004	-0.0801573	0.0531721	-16.3903	-16.5385	0.601169	Ureidosuccinicacid-PAMDB000189	Ureidosuccinicacid-PAMDB000189 [ C5 H8 N2 O5, tgt=46.79, overall=46.79 ]			(194.0775, 14798.907)(195.0817, 3037.0)(177.0675, 6187.3896)
L-Proline-PAMDB000064	-19.2191	2.53426	1.93115	0.263756	-0.123142	0.108871	-1.67202	-0.108871	1.33601	-1.14823	0.864141	-18.3294	L-Proline-PAMDB000064	L-Proline-PAMDB000064 [ C5H9NO2, tgt= ]			(116.73428, 3890.5732)(133.09843, 9286.61)(138.05222, 55027.05)(139.0525, 1547.0566)(123.05294, 33471.312)
12-Diacyl-sn-glycerol(dioctadec-11-enoyln-C18:1)-PAMDB001515	24.8984	24.0727	-0.498417	-0.00716972	-0.280809	0.00716782	-0.158798	-0.093111	-0.0798264	0.751345	23.4414	0.720057	12-Diacyl-sn-glycerol(dioctadec-11-enoyln-C18:1)-PAMDB001515	12-Diacyl-sn-glycerol(dioctadec-11-enoyln-C18:1)-PAMDB001515 [ C39 H72 O5, tgt=34.69, overall=34.69 ]			(625.5742, 18463.03)(626.5768, 5995.15)(603.5174, 64889.25)(604.5235, 14714.08)(638.5687, 4160.66)(625.5756, 937.81)(643.52655, 8208.475)(644.5307, 4159.79)(628.5393, 53107.53)(629.54193, 16587.895)(630.54395, 1202.245)
Valerylcarnitine_BMDB13128	0.764664	2.65286	1.42651	-20.7546	-1.67068	0.671062	-20.9062	0.459465	-0.0718822	0.0718822	-20.1443	-20.0274	Valerylcarnitine_BMDB13128	Valerylcarnitine_BMDB13128 [ C12 H23 N O4, tgt=78.12, overall=78.12 ]			(246.1655, 168943.78)(247.16832, 14763.728)(248.1697, 1380.35)(229.15894, 40819.395)(229.15837, 4830.5)(250.13708, 88280.055)(251.13977, 6956.483)
2-Aceto-2-hydroxy-butyrate-PAMDB000549	0.269365	0.256516	-0.0997582	0.157345	-0.178732	-0.00394058	0.00394058	-17.39	0.0982056	0.840956	-16.6938	-16.5769	2-Aceto-2-hydroxy-butyrate-PAMDB000549	2-Aceto-2-hydroxy-butyrate-PAMDB000549 [ C6 H10 O4, tgt=34.82, overall=34.82 ]			(129.05151, 1887.7626)(147.0622, 7527.5684)(149.0929, 938.76)
PGP(16:0/10:0(3-OH))-PAMDB006599	0.00574875	0.125877	-0.442305	-0.132301	-0.00574875	-0.0215034	-0.0187798	-0.259329	0.214787	0.775621	0.396156	0.444876	PGP(16:0/10:0(3-OH))-PAMDB006599	PGP(16:0/10:0(3-OH))-PAMDB006599 [ C32 H64 O14 P2, tgt=42.86, overall=42.86 ]			(716.3757, 22197.717)(717.3784, 6050.2173)(718.3871, 1846.1788)
DG(12:0/16:1(9Z)/0:0)-PAMDB003645	2.60795	0.9677	-0.157878	-0.141501	-24.3026	0.19019	-0.867475	-0.665381	-0.361556	0.141501	1.27944	2.34624	DG(12:0/16:1(9Z)/0:0)-PAMDB003645	DG(12:0/16:1(9Z)/0:0)-PAMDB003645 [ C31 H58 O5, tgt=69.35, overall=69.35 ]			(493.0103, 19566.178)(494.41818, 7336.7983)(495.4309, 43930.562)(496.4337, 10123.756)(493.41595, 53151.586)(494.4187, 12790.67)(533.6142, 44962.742)(534.5312, 9084.183)(535.43066, 5245.125)(515.40405, 356943.78)(516.4068, 103701.9)(517.40674, 23579.373)(518.4065, 5046.676)
PG(14:0/16:1(9Z))-PAMDB001468	1.95778	-0.218606	-18.9264	0.192035	1.49855	-0.192035	-0.231694	-0.423762	-0.460401	1.16681	0.955075	1.49324	PG(14:0/16:1(9Z))-PAMDB001468	PG(14:0/16:1(9Z))-PAMDB001468 [ C36 H69 O10 P, tgt=32.40, overall=32.40 ]			(694.48114, 2872.3298)(695.484, 907.22)(694.4801, 112.36)(699.5013, 2912.59)(680.4673, 26489.9)(681.46985, 9112.105)(710.59375, 9198.607)(712.4913, 297.68)
PE(17:0cycw7c/16:0)-PAMDB006683	0.739263	0.121028	0.126719	1.85193	-0.121028	-0.160155	-2.01349	-1.6871	-0.156909	-0.763692	0.497434	0.320834	PE(17:0cycw7c/16:0)-PAMDB006683	PE(17:0cycw7c/16:0)-PAMDB006683 [ C38 H74 N O8 P, tgt=78.91, overall=78.91 ]			(705.4061, 8891.826)(705.5334, 2825.9402)(685.52344, 1914.39)(686.5255, 1397.51)(706.5249, 5771.09)(689.5399, 4768.19)(703.5377, 52381.414)(704.5398, 16941.92)(708.49927, 121000.734)(709.50195, 47148.008)(710.504, 7441.666)
PG(19:0cycv8c/14:0(3-OH))-PAMDB004101	-0.474806	17.2681	16.9426	-0.312298	-0.585938	-0.29796	17.1279	-0.398239	-0.384954	18.2474	0.29796	0.414928	PG(19:0cycv8c/14:0(3-OH))-PAMDB004101	PG(19:0cycv8c/14:0(3-OH))-PAMDB004101 [ C39 H75 O11 P, tgt=17.20, overall=17.20 ]			(755.47363, 12077.844)(756.4754, 486.935)
DG(10:0/16:1(9Z)/0:0)-PAMDB003636	1.95719	0.611255	1.51014	1.99448	-24.1413	1.33741	-24.0193	0.0484152	-23.9403	-0.0484152	-23.2574	-23.1404	DG(10:0/16:1(9Z)/0:0)-PAMDB003636	DG(10:0/16:1(9Z)/0:0)-PAMDB003636 [ C29 H54 O5, tgt=63.05, overall=63.05 ]			(483.39175, 169.905)(464.54282, 7307.4126)(466.3882, 8993.28)(467.4012, 59607.23)(468.4041, 13748.55)(484.4002, 4429.9253)(466.3922, 823218.94)(467.3951, 226604.44)(468.39706, 24561.506)(469.39627, 1656.2148)(506.38403, 1672.732)(507.3872, 108.02)(488.8055, 105701.21)(489.37558, 27128.445)(490.37827, 2579.105)
Phenylglyoxal-PAMDB001398	-0.169678	21.7691	20.9293	-0.00716972	-0.280809	0.00716782	-0.158798	-0.093111	-0.0798264	0.751345	22.1551	0.720057	Phenylglyoxal-PAMDB001398	Phenylglyoxal-PAMDB001398 [ C8 H6 O2, tgt= ]			(139.04735, 3917.835)(121.0372, 777.1)(138.052, 20876.89)(157.02165, 100842.8)(158.0246, 2295.825)
Lysyl-Lysine_BMDB62249	0.756972	-3.15308	0.261081	-23.0033	-4.3686	0.876981	-0.261081	-1.67565	-3.32952	0.675954	0.609027	0.765018	Lysyl-Lysine_BMDB62249	Lysyl-Lysine_BMDB62249 [ C12 H26 N4 O3, tgt=59.87, overall=59.87 ]			(276.4546, 3170.5088)(278.20898, 595.97)(276.07083, 5091.2656)(278.2202, 2100.2866)(280.2224, 4524.4)(258.2012, 548.62)(294.23615, 25958.674)(295.84344, 8116.822)(296.452, 3163.536)(277.35223, 9370.551)(277.2294, 1687.82)(301.0579, 1597.7429)(302.20233, 6332.69)(280.1829, 227.13)
DG(10:0/18:1(9Z)/0:0)-PAMDB003638	2.60795	0.9677	-0.157878	-0.141501	-24.3026	0.19019	-0.867475	-0.665381	-0.361556	0.141501	1.27944	2.34624	DG(10:0/18:1(9Z)/0:0)-PAMDB003638	DG(10:0/18:1(9Z)/0:0)-PAMDB003638 [ C31 H58 O5, tgt=69.35, overall=69.35 ]			(493.0103, 19566.178)(494.41818, 7336.7983)(495.4309, 43930.562)(496.4337, 10123.756)(493.41595, 53151.586)(494.4187, 12790.67)(533.6142, 44962.742)(534.5312, 9084.183)(535.43066, 5245.125)(515.40405, 356943.78)(516.4068, 103701.9)(517.40674, 23579.373)(518.4065, 5046.676)
PE(12:0(3-OH)/16:1(9Z))-PAMDB003856	0.69489	1.79023	-0.725474	-0.221883	1.85302	-0.339934	-0.741698	-1.03795	-0.64335	0.621585	0.221883	1.01346	PE(12:0(3-OH)/16:1(9Z))-PAMDB003856	PE(12:0(3-OH)/16:1(9Z))-PAMDB003856 [ C33 H64 N O9 P, tgt=60.85, overall=60.85 ]			(667.4661, 12995.5625)(668.4687, 1949.9149)
CDP-DG(10:0/16:1(9Z))-PAMDB003717	-0.484076	-0.489615	-0.63204	0.355303	-0.0845337	0.103533	0.0845337	-0.185972	-0.142542	0.918268	0.596918	0.764288	CDP-DG(10:0/16:1(9Z))-PAMDB003717	CDP-DG(10:0/16:1(9Z))-PAMDB003717 [ C38 H67 N3 O15 P2, tgt=47.84, overall=47.84 ]			(851.38354, 166438.72)(852.3864, 73823.805)(853.38794, 13987.645)(854.3878, 220.78)
LPA(18:1(9Z)/0:0)-PAMDB006219	-0.611413	-0.215419	0.0871611	-0.200898	-0.545106	-0.0871611	0.368237	0.432509	0.508121	0.519425	-0.243398	0.585143	LPA(18:1(9Z)/0:0)-PAMDB006219	LPA(18:1(9Z)/0:0)-PAMDB006219 [ C21 H41 O7 P, tgt=51.44, overall=51.44 ]			(454.28366, 18882.092)(455.28632, 1940.4636)(460.26147, 486742.84)(461.26425, 119769.34)(462.266, 12316.758)(446.24475, 22954.697)
Homo-L-arginine_BMDB00670	0.319818	-0.394273	-0.150401	0.498404	0.0303335	0.211184	-0.981404	-0.304708	-0.979871	0.0160723	-0.0160723	0.157565	Homo-L-arginine_BMDB00670	Homo-L-arginine_BMDB00670 [ C7 H16 N4 O2, tgt=95.48, overall=95.48 ]			(188.12494, 131308.3)(189.12773, 7493.063)(170.11497, 1156363.1)(171.11787, 100423.414)(172.12048, 4957.822)(172.12968, 682.9125)(194.11287, 5987.178)
PE(14:0/12:0(3-OH))-PAMDB003880	0.410071	0.0018816	-0.409055	0.0458879	-0.0458631	-0.0018816	-0.186389	-0.518912	-0.0218897	1.0661	0.855023	1.57681	PE(14:0/12:0(3-OH))-PAMDB003880	PE(14:0/12:0(3-OH))-PAMDB003880 [ C31 H62 N O9 P, tgt=63.88, overall=63.88 ]			(645.4587, 16108.429)(646.46234, 3468.5117)(623.44073, 21821.123)(624.44336, 2953.585)
Histidinyl-Cysteine_BMDB62239	-0.280519	2.52079	2.46774	-0.67848	-1.18045	0.434097	0.231873	1.87715	2.29968	-2.89435	-0.231873	-1.67581	Histidinyl-Cysteine_BMDB62239	Histidinyl-Cysteine_BMDB62239 [ C9 H14 N4 O3 S, tgt=50.01, overall=50.01 ]			(244.07445, 4164.3247)(244.07574, 1600.6117)(258.10587, 624437.3)(259.10858, 45777.05)(260.10962, 6742.484)
PE(16:0/16:0)-PAMDB000756	-11.0977	10.1767	11.4179	11.5571	-11.2088	10.8785	-11.0868	-11.0211	10.6185	-10.1767	10.3239	-10.208	PE(16:0/16:0)-PAMDB000756	PE(16:0/16:0)-PAMDB000756 [ C37H74NO8P, tgt= ]			(673.51624, 26012.566)(674.5182, 8066.6704)(711.8759, 41645.133)(712.94666, 18091.287)(713.9546, 7386.042)(715.5714, 63182.734)(694.5498, 1642.21)(696.5608, 175.2)(716.50854, 9567.63)(717.51135, 3436.386)(700.2653, 1713.84)(701.2659, 2896.375)(701.5156, 5353.02)
PG(10:0(3-OH)/12:0(3-OH))-PAMDB004024	0.11751	-0.115898	-17.0528	-16.5615	-16.8351	0.115898	1.3415	0.569086	0.884825	1.92093	-15.9513	-15.8343	PG(10:0(3-OH)/12:0(3-OH))-PAMDB004024	PG(10:0(3-OH)/12:0(3-OH))-PAMDB004024 [ C28 H55 O12 P, tgt=19.22, overall=19.22 ]			(597.32635, 10092.124)(598.7618, 1231.7728)(601.3574, 773.37)
cis-11-Octadecenoic acid_BMDB62097	1.12068	1.10453	-0.0868387	0.10583	0.453221	0.441457	0.000628471	-28.7171	-0.000628471	-27.8726	-28.0209	-27.9039	cis-11-Octadecenoic acid_BMDB62097	cis-11-Octadecenoic acid_BMDB62097 [ C18 H34 O2, tgt=92.28, overall=92.28 ]			(265.24823, 618703.56)(266.25113, 103802.586)(267.25403, 5969.9224)(268.2583, 30389.469)(269.26117, 4040.67)(282.27487, 1.1771028E7)(283.27762, 2574014.2)(284.28137, 257109.73)(285.28442, 12465.175)
L-Methionine-PAMDB000175	2.96807	2.26163	2.11518	-17.3113	-0.710594	-17.297	-17.4629	2.31362	1.82687	-16.5528	0.710594	-16.5841	L-Methionine-PAMDB000175	L-Methionine-PAMDB000175 [ C5 H11 N O2 S, tgt=44.75, overall=44.75 ]			(150.0526, 26012.277)(152.05373, 5021.048)(167.0858, 153.36)(172.03635, 683.8)(158.0244, 2730.5366)
DG(16:1(9Z)/17:0cycw7c/0:0)-PAMDB006915	-2.39361	0.28745	0.0212317	1.1891	0.486894	0.274919	-0.268937	0.602189	-0.0212317	-23.6357	-23.784	-2.6432	DG(16:1(9Z)/17:0cycw7c/0:0)-PAMDB006915	DG(16:1(9Z)/17:0cycw7c/0:0)-PAMDB006915 [ C36 H66 O5, tgt=63.21, overall=63.21 ]			(560.4759, 7957.7197)(561.47253, 1923.4187)(563.2542, 26649.027)(564.5049, 4833.497)(565.5059, 2421.3)(578.5106, 21651.459)(579.51935, 7771.627)(602.16504, 88881.875)(603.5029, 4924.66)(585.47974, 9928.234)(586.2582, 3001.7666)(587.4854, 2672.8533)(588.48627, 912.69995)(588.4796, 332.44)
6-Hydroxymethyldihydropterin-PAMDB001590	10.1105	9.05545	9.15208	-8.90707	8.78355	10.1776	8.14856	-8.99301	-8.97973	-8.14856	-8.29682	-8.17985	6-Hydroxymethyldihydropterin-PAMDB001590	6-Hydroxymethyldihydropterin-PAMDB001590 [ C7 H9 N5 O2, tgt=47.55, overall=47.55 ]			(177.0667, 6715.608)(182.58405, 1094.53)(213.10583, 1321.6466)(195.0953, 1718.76)(220.06877, 1287.8141)
finafloxacin-PAMDB100064	0.429433	0.3196	0.248921	-0.248921	-0.374814	-0.521754	0.958282	-17.3539	0.700713	1.90566	-16.6577	-16.5407	finafloxacin-PAMDB100064	finafloxacin-PAMDB100064 [ C20 H19 F N4 O4, tgt=30.95, overall=30.95 ]			(382.1384, 8194.484)(383.1415, 983.83)(384.77914, 5097.4697)(416.17032, 14641.943)(417.172, 667.1)(407.13763, 5804.902)(408.1391, 256.33)
Hypoxanthine-PAMDB000059	16.3863	19.2251	15.6553	-0.74287	-1.01651	-0.728533	-0.894499	16.1167	16.7495	0.0156441	-0.132612	-0.0156441	Hypoxanthine-PAMDB000059	Hypoxanthine-PAMDB000059 [ C5 H4 N4 O, tgt=27.56, overall=27.56 ]			(137.54407, 27533.09)(139.0472, 13151.996)(122.838844, 2210.8398)(124.0404, 4143.01)(136.05905, 9816.205)
Quinolinicacid-PAMDB000096	-1.1338	0.126219	0.582909	-3.67747	-3.77771	-0.126219	-3.08937	0.365547	0.701391	-2.0149	2.62903	1.09156	Quinolinicacid-PAMDB000096	Quinolinicacid-PAMDB000096 [ C7 H5 N O4, tgt=47.41, overall=47.41 ]			(190.01607, 17159.652)(152.0191, 3766.81)(186.5624, 62659.06)(187.49046, 24690.074)(188.0629, 1172.52)(170.0294, 1388.96)(168.04747, 16741.596)(169.04861, 2682.1433)(172.0549, 928.8425)
2-tetradecanoyl-sn-glycerol3-phosphate-PAMDB001575	0.171372	0.181577	-0.0454264	0.349021	0.0454264	0.293773	0.364961	-0.0934381	-3.20352	-2.3865	-3.35801	-2.60292	2-tetradecanoyl-sn-glycerol3-phosphate-PAMDB001575	2-tetradecanoyl-sn-glycerol3-phosphate-PAMDB001575 [ C17 H35 O7 P, tgt=79.43, overall=79.43 ]			(405.20276, 300684.8)(406.20447, 33398.344)(407.20605, 740.75006)(387.18655, 579595.75)(388.18948, 99971.34)(389.1914, 8313.0)
PE(16:0/12:0(3-OH))-PAMDB003892	0.654247	-0.444405	-0.13797	0.682629	-0.0636597	0.0636597	-0.461355	-0.403307	-0.682459	0.333439	0.138075	0.457472	PE(16:0/12:0(3-OH))-PAMDB003892	PE(16:0/12:0(3-OH))-PAMDB003892 [ C33 H66 N O9 P, tgt=65.01, overall=65.01 ]			(658.4636, 594.25)(634.4405, 34261.16)(635.4431, 8722.946)(636.4497, 394.28)(654.4809, 1065.245)(678.13055, 16606.67)(679.26843, 11362.755)(679.468, 9031.49)
Riboflavin-PAMDB000103	0.139048	1.66629	0.218733	-0.139048	-0.839607	-0.150213	-18.3822	-0.489828	-0.164011	0.385328	1.79187	0.560377	Riboflavin-PAMDB000103	Riboflavin-PAMDB000103 [ C17 H20 N4 O6, tgt=51.76, overall=51.76 ]			(399.11868, 2319.3699)(377.13834, 53311.863)(378.14078, 6349.267)
Octaprenyldiphosphate-PAMDB000251	0.91599	0.280416	0.0523558	0.906726	0.553922	0.737452	-1.2108	-0.441972	-17.5082	-0.386748	-0.23799	-0.0523558	Octaprenyldiphosphate-PAMDB000251	Octaprenyldiphosphate-PAMDB000251 [ C40 H68 O7 P2, tgt=34.35, overall=34.35 ]			(750.4412, 22034.412)(751.4426, 8213.871)
3E-tetradecenoic acid_BMDB62585	0.319247	0.00818539	-0.261321	0.284272	0.0560255	0.269406	-0.330085	-0.00818539	-0.389333	-20.5565	0.140244	-20.5878	3E-tetradecenoic acid_BMDB62585	3E-tetradecenoic acid_BMDB62585 [ C14 H26 O2, tgt=82.20, overall=82.20 ]			(209.18579, 5086.396)(212.19675, 29763.887)(213.19978, 1420.5989)(247.23792, 402128.6)(248.24081, 62359.676)(249.2435, 1769.794)(226.21211, 38221.586)(227.21504, 2940.086)(228.22725, 357.99667)
syringolinA-PAMDB100006	0.356286	0.438224	-1.37848	0.251542	0.0465097	0.224113	-1.41686	0.174403	-1.95223	-0.0465097	-20.1324	-0.591651	syringolinA-PAMDB100006	syringolinA-PAMDB100006 [ C24 H39 N5 O6, tgt=31.18, overall=31.18 ]			(495.28882, 2422.3215)(496.2924, 772.96)(475.2822, 33293.49)(476.28427, 4919.74)(493.31647, 153.28)(498.27127, 1699.31)
N2-succinylglutamate-PAMDB006308	-0.126179	17.554	-0.454918	0.0363293	-0.23731	0.0506668	-0.115299	-0.049612	-0.0363274	0.794844	0.646587	0.763556	N2-succinylglutamate-PAMDB006308	N2-succinylglutamate-PAMDB006308 [ C9H10NO7, tgt= ]			(247.0521, 1001.73)(244.0746, 16666.17)
Myoinositol-PAMDB000603	-0.00323677	2.45831	1.18019	0.200661	-19.6332	-0.349163	-1.30865	-0.313826	0.00323677	-0.229916	2.15466	0.133585	Myoinositol-PAMDB000603	Myoinositol-PAMDB000603 [ C6 H12 O6, tgt=53.01, overall=53.01 ]			(180.15381, 46548.36)(181.26663, 4698.748)(185.0746, 18681.15)(162.0514, 4337.51)(183.0983, 772.99)(208.06924, 4089.6802)
DG(19:1(9Z)/14:0/0:0)-PAMDB003705	0.43595	1.50626	0.0709658	1.31169	-0.0709658	-0.584905	0.977351	-0.30107	0.984223	-20.3269	-20.4752	-2.3566	DG(19:1(9Z)/14:0/0:0)-PAMDB003705	DG(19:1(9Z)/14:0/0:0)-PAMDB003705 [ C36 H68 O5, tgt=54.87, overall=54.87 ]			(563.49097, 3828.8657)(565.5071, 10906.234)(566.5089, 3305.92)(604.51636, 2258.4668)(564.5221, 1957.71)(582.5135, 4578.38)(587.9288, 39369.79)(587.4952, 15057.898)(588.49677, 1683.4349)(580.5247, 7599.29)
Melibiose-PAMDB000015	-0.353734	0.28869	0.0426664	-1.05069	-1.41269	-0.0235109	-0.43426	0.0235109	0.180655	-0.406219	0.734988	0.262403	Melibiose-PAMDB000015	Melibiose-PAMDB000015 [ C12 H22 O11, tgt=63.76, overall=63.76 ]			(343.11697, 49482.45)(344.11975, 3536.9517)(325.1066, 31819.656)(326.10956, 1753.6617)(360.1428, 25569.467)(361.14584, 1400.0134)(365.09924, 786469.94)(366.10226, 86900.73)(367.10306, 12424.948)
DG(18:1(11Z)/12:0/0:0)-PAMDB006462	2.44244	3.94519	-0.00271988	0.396084	2.80842	-22.6297	0.329378	-0.0246811	0.00271988	-21.8856	-22.0338	-21.9169	DG(18:1(11Z)/12:0/0:0)-PAMDB006462	DG(18:1(11Z)/12:0/0:0)-PAMDB006462 [ C33 H62 O5, tgt=51.88, overall=51.88 ]			(521.44574, 32789.2)(522.5953, 11966.198)(523.6059, 281388.94)(524.46576, 94743.79)(525.4678, 10648.46)(560.99774, 34082.01)(561.4998, 54565.965)(538.4795, 16152.37)(561.4629, 445.1)(543.5609, 52618.867)(544.64355, 15427.901)(545.6474, 1120.224)(547.459, 5154.6)
N-(gamma-L-glutamyl)-L-alaninolzwitterion-PAMDB100016	0.755556	0.0466366	-0.280035	0.764549	0.472328	0.646856	-1.37664	0.0599442	-1.24669	-0.448288	-0.410715	-0.0466366	N-(gamma-L-glutamyl)-L-alaninolzwitterion-PAMDB100016	N-(gamma-L-glutamyl)-L-alaninolzwitterion-PAMDB100016 [ C8 H16 N2 O4, tgt=68.46, overall=68.46 ]			(222.14265, 92895.13)(223.14546, 6436.315)(224.1579, 788.38)
PS(12:0(3-OH)/15:0cyclo)-PAMDB003950	-0.255841	-0.645038	-1.01435	-0.651956	-0.753209	-0.932342	0.48903	0.255841	0.569871	0.258786	1.37655	0.281997	PS(12:0(3-OH)/15:0cyclo)-PAMDB003950	PS(12:0(3-OH)/15:0cyclo)-PAMDB003950 [ C33 H60 N O11 P, tgt=68.29, overall=68.29 ]			(678.3961, 33588.227)(679.3988, 8820.237)(680.4018, 267.33)(682.3519, 83191.055)(683.3544, 22854.072)(684.3562, 1643.3717)
Tyrosyl-Leucine_BMDB62265	1.8552	1.09273	-18.1612	-17.6699	1.91084	1.20707	-0.400914	0.400914	-0.616919	0.774812	-17.0597	-16.9427	Tyrosyl-Leucine_BMDB62265	Tyrosyl-Leucine_BMDB62265 [ C15 H22 N2 O4, tgt=37.02, overall=37.02 ]			(279.1532, 8617.42)(313.18582, 4281.82)(301.13467, 6969.88)
10E-Octadecenoic acid_BMDB63576	1.12068	1.10453	-0.0868387	0.10583	0.453221	0.441457	0.000628471	-28.7171	-0.000628471	-27.8726	-28.0209	-27.9039	10E-Octadecenoic acid_BMDB63576	10E-Octadecenoic acid_BMDB63576 [ C18 H34 O2, tgt=92.28, overall=92.28 ]			(265.24823, 618703.56)(266.25113, 103802.586)(267.25403, 5969.9224)(268.2583, 30389.469)(269.26117, 4040.67)(282.27487, 1.1771028E7)(283.27762, 2574014.2)(284.28137, 257109.73)(285.28442, 12465.175)
Tetradecenoate(N-C14:1)-PAMDB001758	0.910899	0.455466	0.235814	0.495399	0.635934	0.120351	-1.34033	-0.120351	-18.382	-17.5508	-17.699	-17.5821	Tetradecenoate(N-C14:1)-PAMDB001758	Tetradecenoate(N-C14:1)-PAMDB001758 [ C14 H25 O2, tgt=72.48, overall=72.48 ]			(207.1699, 3689.4487)(231.2059, 4114.762)(211.82025, 16382.234)(210.1884, 2967.16)(245.2221, 263633.97)(246.22519, 44537.62)(247.2238, 11966.564)(226.21307, 614449.3)(227.2162, 253849.94)(228.219, 11808.95)
PG(18:1(9Z)/15:0cyclo)-PAMDB006511	-3.93915	0.428424	0.00436687	-20.7188	0.0826273	-0.00436687	0.107686	0.0550451	0.148732	-1.51941	-0.613959	-1.80485	PG(18:1(9Z)/15:0cyclo)-PAMDB006511	PG(18:1(9Z)/15:0cyclo)-PAMDB006511 [ C39 H73 O10 P, tgt=41.13, overall=41.13 ]			(733.5032, 4574.99)(716.50903, 18682.098)(717.5121, 5305.2373)(718.7984, 14273.069)(719.80023, 4270.611)(718.5132, 155.44)(734.53217, 887.48254)(738.4885, 728.63)
L-Lysine-PAMDB000075	0.51815	0.439945	-0.0268955	0.614761	0.276934	0.405058	-18.9289	0.0268955	-18.8499	-18.0187	-18.167	-18.05	L-Lysine-PAMDB000075	L-Lysine-PAMDB000075 [ C6 H14 N2 O2, tgt=43.78, overall=43.78 ]			(147.1135, 11367.844)(153.08752, 724.99426)
PE(12:0(3-OH)/14:0)-PAMDB003851	0.410071	0.0018816	-0.409055	0.0458879	-0.0458631	-0.0018816	-0.186389	-0.518912	-0.0218897	1.0661	0.855023	1.57681	PE(12:0(3-OH)/14:0)-PAMDB003851	PE(12:0(3-OH)/14:0)-PAMDB003851 [ C31 H62 N O9 P, tgt=63.88, overall=63.88 ]			(645.4587, 16108.429)(646.46234, 3468.5117)(623.44073, 21821.123)(624.44336, 2953.585)
PE(12:0/10:0)-PAMDB001993	0.520668	-0.777857	-0.14267	-0.236639	0.186426	-0.141159	-0.2799	0.141159	-2.16953	0.821997	0.425213	0.932728	PE(12:0/10:0)-PAMDB001993	PE(12:0/10:0)-PAMDB001993 [ C27 H54 N O8 P, tgt=52.61, overall=52.61 ]			(553.379, 407586.0)(554.3817, 114447.1)(555.3803, 24709.3)(556.3801, 1630.6)(535.8551, 1977.5801)(553.3809, 513603.84)(554.38385, 148789.36)(555.3824, 30941.912)(556.382, 2520.7334)(534.3682, 238.45)(572.6448, 15630.204)(573.97424, 10699.697)(574.65454, 3721.7375)(553.3804, 460178.06)(554.3832, 133186.0)(555.3818, 28102.105)(556.38153, 2788.0571)
16-Anhydrous-N-Acetylmuramyl-tripeptide-PAMDB001521	0.618036	0.942108	0.152287	0.20233	0.299999	-0.152287	0.570007	-1.00287	-17.351	-16.5198	-16.6681	-16.5511	16-Anhydrous-N-Acetylmuramyl-tripeptide-PAMDB001521	16-Anhydrous-N-Acetylmuramyl-tripeptide-PAMDB001521 [ C26 H43 N5 O14, tgt=80.56, overall=80.56 ]			(653.2877, 52644.445)(654.2904, 13064.42)(655.2926, 1054.86)(670.06354, 5016.3516)(670.91425, 4099.73)(671.317, 1700.145)(675.2694, 75308.12)(676.272, 19409.625)(677.2729, 1888.8601)
3-Deoxy-D-manno-octulosonate-PAMDB000918	0.376674	1.88354	1.13694	-0.502534	-17.4987	-0.376674	-0.389583	0.776557	1.18256	-16.4665	0.621724	-16.4978	3-Deoxy-D-manno-octulosonate-PAMDB000918	3-Deoxy-D-manno-octulosonate-PAMDB000918 [ C8 H13 O8, tgt=64.85, overall=64.85 ]			(260.04807, 17836.338)(262.0467, 603.3)(220.0557, 4659.975)(237.0578, 1503.205)(258.10596, 517785.22)(259.10855, 35015.08)(247.0521, 939.12)
Glucosamine6-phosphate-PAMDB000310	-0.0987444	2.57205	1.82574	-16.5367	-16.8104	0.0987444	-0.234799	1.46526	1.87123	-15.7782	1.31007	-15.8095	Glucosamine6-phosphate-PAMDB000310	Glucosamine6-phosphate-PAMDB000310 [ C6 H14 N O8 P, tgt=83.67, overall=83.67 ]			(247.0521, 939.12)(280.0869, 49680.54)(281.0895, 3096.8674)(260.0482, 9517.37)
Glycerophosphocholine-PAMDB000032	0.086751	0.044364	-0.1116	0.0629511	-0.28581	-0.044364	0.0550871	-0.546412	0.181968	0.943896	-20.0943	-19.9773	Glycerophosphocholine-PAMDB000032	Glycerophosphocholine-PAMDB000032 [ C8 H21 N O6 P, tgt=64.54, overall=64.54 ]			(262.13834, 806.65497)(281.09686, 70920.27)(282.09967, 6506.7217)(283.1115, 785.194)(263.08612, 7412.2744)
PA(16:0/18:1(9Z))-PAMDB000744	-21.4289	2.06126	1.5695	-21.2664	0.699166	0.420188	0.374476	0.314994	-21.3391	-1.62267	-0.759654	-0.314994	PA(16:0/18:1(9Z))-PAMDB000744	PA(16:0/18:1(9Z))-PAMDB000744 [ C37 H71 O8 P, tgt=58.65, overall=58.65 ]			(675.2979, 24041.693)(676.51, 9154.46)(678.268, 3851.33)(678.5184, 1044.35)(656.4811, 1414.2825)(675.5065, 52571.81)(676.511, 17355.56)(658.5016, 115779.58)(658.4971, 80068.48)(659.4989, 11910.5)(674.85205, 3777.8333)(676.5332, 4073.95)(677.5195, 33099.71)(699.4793, 350.64)(680.46765, 18866.734)(681.4703, 6431.517)
gamma-Glutamyl-beta-aminopropiononitrile-PAMDB000997	1.06148	0.533028	-1.37197	0.392445	-0.374519	0.241867	-0.241867	-0.343847	-1.55133	0.461304	-1.47825	1.01232	gamma-Glutamyl-beta-aminopropiononitrile-PAMDB000997	gamma-Glutamyl-beta-aminopropiononitrile-PAMDB000997 [ C8 H13 N3 O3, tgt=46.80, overall=46.80 ]			(183.17189, 12520.149)(184.0938, 2175.7017)(218.1345, 52527.02)(219.1369, 3782.36)(200.1256, 6277.4478)
PE(10:0/15:0)-PAMDB001985	0.738096	0.21044	-0.305777	0.0356903	0.00383377	-0.00383377	-0.215229	-0.506731	-21.8897	-21.0585	0.351511	0.597399	PE(10:0/15:0)-PAMDB001985	PE(10:0/15:0)-PAMDB001985 [ C30 H60 N O8 P, tgt=59.17, overall=59.17 ]			(596.4083, 1010.2234)(615.19385, 31998.938)(616.3203, 12699.73)(616.4442, 10477.79)(593.43054, 52437.484)(594.4328, 9661.235)(599.38116, 188514.28)(600.38385, 49149.7)(601.38525, 5579.99)
PA(16:0e/18:0)-PAMDB000814	-21.4321	-0.477303	-21.7608	5.7215	-0.141108	5.23944	0.141108	4.79327	5.06901	-20.511	3.77979	-20.5423	PA(16:0e/18:0)-PAMDB000814	PA(16:0e/18:0)-PAMDB000814 [ C37 H75 O7 P, tgt= ]			(662.52704, 6072.923)(663.52893, 492.63)(646.91125, 19032.209)(648.50946, 7014.5737)(649.5105, 182.18)(667.2194, 9312.15)(668.55383, 4110.055)(680.8569, 232084.73)(681.9089, 105706.97)(682.5809, 37076.984)(683.58514, 8056.515)(665.7484, 21327.785)(667.359, 31791.082)(668.5654, 316.92)(685.86084, 89373.76)(686.8637, 32082.326)(687.5353, 9264.388)(688.5425, 1027.0326)(672.68414, 8145.547)(673.5226,…
Pipecolic acid_BMDB00070	-18.3987	0.981005	0.514164	1.15582	0.817993	0.946117	-0.920425	0.567955	-0.514164	-17.4777	-17.6259	-17.5089	Pipecolic acid_BMDB00070	Pipecolic acid_BMDB00070 [ C6H11NO2, tgt= ]			(130.83264, 4677.1484)(112.07295, 580.375)(147.11346, 11022.849)
Niacinamide-PAMDB000374	0.121068	0.0390825	-0.341889	-0.0390825	-0.513606	0.161479	0.211492	0.11139	0.138476	-21.2175	-21.3658	-21.2488	Niacinamide-PAMDB000374	Niacinamide-PAMDB000374 [ C6 H6 N2 O, tgt=65.12, overall=65.12 ]			(123.05314, 251903.36)(124.05582, 10810.07)(150.05276, 13021.936)
PE(10:0(3-OH)/18:1(9Z))-PAMDB003840	0.69489	1.79023	-0.725474	-0.221883	1.85302	-0.339934	-0.741698	-1.03795	-0.64335	0.621585	0.221883	1.01346	PE(10:0(3-OH)/18:1(9Z))-PAMDB003840	PE(10:0(3-OH)/18:1(9Z))-PAMDB003840 [ C33 H64 N O9 P, tgt=60.85, overall=60.85 ]			(667.4661, 12995.5625)(668.4687, 1949.9149)
PGP(10:0(3-OH)/16:1(9Z))-PAMDB006537	-0.0526066	0.0721493	-0.455387	-0.129189	-0.0172596	-0.0317612	0.0172596	-0.251383	0.258236	0.874603	0.51893	0.560394	PGP(10:0(3-OH)/16:1(9Z))-PAMDB006537	PGP(10:0(3-OH)/16:1(9Z))-PAMDB006537 [ C32 H62 O14 P2, tgt=25.72, overall=25.72 ]			(716.3757, 21861.834)(717.3784, 5960.264)
L-Isoleucine-PAMDB000071	0.0830193	0.0451984	0.0893288	-0.0451984	-0.150492	-0.358952	-0.784189	0.193613	0.766443	1.71027	-21.3613	-0.112181	L-Isoleucine-PAMDB000071	L-Isoleucine-PAMDB000071 [ C6 H13 N O2, tgt=60.31, overall=60.31 ]			(114.08916, 181071.48)(115.09219, 6873.5703)(141.08818, 4431.4976)
DG(12:0/10:0/0:0)-PAMDB003640	-22.3213	2.10086	1.43505	-22.1588	-0.355096	2.26999	0.355096	4.46748	-22.2315	4.23587	-21.5486	-21.4316	DG(12:0/10:0/0:0)-PAMDB003640	DG(12:0/10:0/0:0)-PAMDB003640 [ C25H48O5, tgt= ]			(429.3636, 381.2125)(410.32715, 49916.227)(411.33963, 443679.8)(412.3425, 100472.9)(413.3445, 9094.565)(447.39478, 105.71)(451.3307, 805.09)(435.05045, 9050.842)(437.01614, 101018.56)(438.3564, 33101.773)
DG(18:1(9Z)/12:0(3-OH)/0:0)-PAMDB006930	-0.944182	0.753087	0.352559	-1.90112	0.0266409	-0.0266409	0.203818	0.102592	0.0489626	-25.293	-6.90235	-25.3243	DG(18:1(9Z)/12:0(3-OH)/0:0)-PAMDB006930	DG(18:1(9Z)/12:0(3-OH)/0:0)-PAMDB006930 [ C33 H62 O6, tgt=49.95, overall=49.95 ]			(577.43335, 233386.86)(578.4362, 70085.41)(579.43854, 9365.79)(580.4394, 592.51)(572.7798, 554152.9)(573.7827, 193154.11)(574.78595, 44227.535)(578.5127, 48242.2)(558.46173, 28225.06)(559.46454, 7072.246)(560.4626, 4307.07)(561.4662, 703.0)(563.4522, 1318.4067)(560.4932, 10180.23)
PS(18:1(11Z)/14:0)-PAMDB001456	20.2292	20.886	-1.17563	20.3332	20.4392	-0.670048	-0.836014	-0.770327	-0.757042	0.0741291	-0.0741272	17.0429	PS(18:1(11Z)/14:0)-PAMDB001456	PS(18:1(11Z)/14:0)-PAMDB001456 [ C38 H72 N O10 P, tgt=18.40, overall=18.40 ]			(738.4876, 1356.9)(740.5058, 169.37)(717.3094, 19506.035)(718.3118, 5972.5737)(718.5132, 167.02)(733.5253, 5479.84)
PS(15:0/14:0(3-OH))-PAMDB003981	-0.145521	-0.108856	-0.581821	-0.219355	-0.234129	-0.338436	0.389105	0.108856	0.605173	1.25394	0.43609	1.29806	PS(15:0/14:0(3-OH))-PAMDB003981	PS(15:0/14:0(3-OH))-PAMDB003981 [ C35 H66 N O11 P, tgt=47.95, overall=47.95 ]			(713.41016, 120633.625)(714.4126, 36948.496)(715.41406, 4999.241)
Itaconic acid_BMDB02092	0.26179	2.12137	1.01726	-16.4881	-16.7618	-16.4738	0.0243654	-0.0243654	0.916739	-15.7296	0.870107	-15.7609	Itaconic acid_BMDB02092	Itaconic acid_BMDB02092 [ C5 H6 O4, tgt=14.50, overall=14.50 ]			(148.05728, 7184.8086)(130.04694, 3627.4158)(157.02136, 122365.1)(158.02429, 3252.4648)
Mono-rhamnolipid(class)-PAMDB100087	-0.210892	-0.207317	-0.332657	0.446047	0.00511551	0.227297	-0.0204792	-0.00511551	-0.138636	0.883057	0.616293	0.767517	Mono-rhamnolipid(class)-PAMDB100087	Mono-rhamnolipid(class)-PAMDB100087 [ C18 H32 O9, tgt=46.07, overall=46.07 ]			(374.1882, 716.88184)(415.2046, 4084268.0)(416.2078, 1067171.8)(417.2103, 154712.1)(418.21204, 11718.19)(397.19327, 29731.61)(398.19638, 4740.5366)
PS(10:0(3-OH)/16:0)-PAMDB003933	10.2384	9.77438	9.71506	-8.66798	8.05598	-8.65365	8.50859	-8.75393	7.90947	-7.90947	-8.05773	-7.94076	PS(10:0(3-OH)/16:0)-PAMDB003933	PS(10:0(3-OH)/16:0)-PAMDB003933 [ C32 H60 N O11 P, tgt=61.77, overall=61.77 ]			(647.37866, 10765.544)(648.38165, 1574.8334)
Behenic acid_BMDB00944	4.16805	-0.313739	0.833432	0.00836658	-0.00836658	0.0514441	-19.2129	-0.082139	-19.1339	-18.3028	0.775329	1.54619	Behenic acid_BMDB00944	Behenic acid_BMDB00944 [ C22 H44 O2, tgt=44.26, overall=44.26 ]			(326.33398, 5139.565)(327.33722, 217.02333)(340.35, 36947.742)(341.35327, 6082.4946)(342.3561, 1142.55)(350.33368, 5469.2925)
PS(19:0/19:0)-PAMDB001463	0.455561	0.589937	0.307611	-16.684	-0.327068	-0.151144	0.673075	-16.7699	0.151144	1.50141	-16.0737	-15.9568	PS(19:0/19:0)-PAMDB001463	PS(19:0/19:0)-PAMDB001463 [ C44 H86 N O10 P, tgt=19.03, overall=19.03 ]			(823.58875, 23422.965)(824.5916, 9363.548)(824.5885, 6253.26)
Folicacid-PAMDB000044	1.57738	0.381079	1.71409	-0.427248	-0.382339	-0.804338	0.0460167	-0.0511379	0.240013	1.09276	-0.0460167	-16.67	Folicacid-PAMDB000044	Folicacid-PAMDB000044 [ C19 H19 N7 O6, tgt=44.80, overall=44.80 ]			(441.1325, 9376.09)(442.1289, 670.75)(423.1329, 4650.04)(425.14856, 189182.31)(426.15225, 34159.957)(427.154, 2593.63)
PG(16:0/16:0)-PAMDB000791	16.2734	16.1771	15.8666	18.9931	-0.942381	-0.654404	-0.82037	-0.754683	-0.741398	0.0897732	-0.0584831	0.058485	PG(16:0/16:0)-PAMDB000791	PG(16:0/16:0)-PAMDB000791 [ C38 H75 O10 P, tgt=52.26, overall=52.26 ]			(704.501, 8788.163)(705.50385, 1405.8966)(708.4973, 17418.11)(709.5, 6479.55)(710.5025, 928.06)(711.5359, 75.24)(744.53827, 11299.403)(745.54205, 4794.46)(748.52594, 2959.7966)
DG(16:0/18:1(9Z)/0:0)-PAMDB003674	0.541729	0.0660953	-0.32855	-0.0319977	0.0319977	0.125782	-20.5274	0.125782	-20.4484	0.564198	-19.7655	-0.174486	DG(16:0/18:1(9Z)/0:0)-PAMDB003674	DG(16:0/18:1(9Z)/0:0)-PAMDB003674 [ C37 H70 O5, tgt=86.88, overall=86.88 ]			(595.5277, 3053.7446)(578.30383, 1318.0701)(617.51105, 60465.168)(618.51355, 17875.205)(619.5129, 1998.7067)(601.00995, 15267.578)(601.5102, 4220.9062)(603.52246, 593.6367)
4-Hydroxy-3-polyprenylbenzoate-PAMDB004183	0.69921	-0.239787	0.0345354	-0.0345354	-0.34846	-0.312322	0.823552	0.42887	0.84822	1.81288	-18.5176	-18.4007	4-Hydroxy-3-polyprenylbenzoate-PAMDB004183	4-Hydroxy-3-polyprenylbenzoate-PAMDB004183 [ C17 H22 O3, tgt=53.92, overall=53.92 ]			(274.15402, 28792.807)(275.1569, 2970.4915)(260.15643, 1794.6125)(257.15964, 1462.6775)
PE(18:1(11Z)/14:0)-PAMDB000763	-2.27837	-1.12275	1.72389	2.81196	1.07598	-21.0459	2.76707	2.70729	0.91389	-20.3017	-20.4499	-0.91389	PE(18:1(11Z)/14:0)-PAMDB000763	PE(18:1(11Z)/14:0)-PAMDB000763 [ C37 H72 N O8 P, tgt=52.49, overall=52.49 ]			(689.98596, 6708.81)(690.4833, 2250.19)(675.8234, 9314.354)(677.504, 3160.8252)(690.493, 145.3)(674.5031, 13143.329)(675.675, 3969.332)(676.67834, 9102.69)(677.3168, 2645.5479)(677.51886, 11326.82)(678.52106, 3098.8867)(709.53357, 18325.473)(712.03796, 12052.402)(713.05, 17268.67)(712.5439, 3806.4)(713.5567, 14878.42)(694.5498, 2149.36)(716.0067, 5874.689)(717.51166, 2246.5017)(718.5253, 2381.746…
Acetyl-D-carnitine_BMDB62606	-0.94493	2.82436	1.92611	-1.46595	-2.32195	-0.0907583	-0.264564	0.928287	1.60715	-20.2406	2.9155	0.0907583	Acetyl-D-carnitine_BMDB62606	Acetyl-D-carnitine_BMDB62606 [ C9 H17 N O4, tgt=70.89, overall=70.89 ]			(204.11938, 205223.8)(205.12236, 14461.281)(206.12492, 1986.1733)(186.1082, 452.27)(208.15013, 13015.809)
N-(3-oxododecanoyl)-L-homoserinelactone-PAMDB100010	0.311388	0.0243034	0.253304	-0.198709	-0.0243034	-0.0877552	0.582312	-0.584934	0.232351	1.61157	-17.149	-17.032	N-(3-oxododecanoyl)-L-homoserinelactone-PAMDB100010	N-(3-oxododecanoyl)-L-homoserinelactone-PAMDB100010 [ C16 H27 N O4, tgt=74.08, overall=74.08 ]			(300.8661, 1454.6466)(302.2029, 1026.29)(318.23444, 99664.15)(319.23703, 12871.542)(320.1832, 14998.122)(321.1868, 311.64)(306.1772, 6517.292)
Homocarnosine-PAMDB000182	17.3662	16.8977	-1.23412	17.0637	-1.01651	16.2274	-0.894499	17.3383	-0.815527	0.0156441	-0.132612	-0.0156441	Homocarnosine-PAMDB000182	Homocarnosine-PAMDB000182 [ C10 H16 N4 O3, tgt=65.54, overall=65.54 ]			(225.1169, 1377.48)(224.12361, 8902.358)(225.11737, 1992.5634)(259.16046, 742.528)
PS(15:0cyclo/19:0cycv8c)-PAMDB006719	-0.169678	19.1145	-0.498417	-0.00716972	19.4315	0.00716782	-0.158798	-0.093111	-0.0798264	0.751345	0.603088	0.720057	PS(15:0cyclo/19:0cycv8c)-PAMDB006719	PS(15:0cyclo/19:0cycv8c)-PAMDB006719 [ C40 H72 N O10 P, tgt=17.15, overall=17.15 ]			(740.50616, 11978.1)(741.5091, 2493.155)
DG(15:0/18:1(9Z)/0:0)-PAMDB003665	0.43595	1.50626	0.0709658	1.31169	-0.0709658	-0.584905	0.977351	-0.30107	0.984223	-20.3269	-20.4752	-2.3566	DG(15:0/18:1(9Z)/0:0)-PAMDB003665	DG(15:0/18:1(9Z)/0:0)-PAMDB003665 [ C36 H68 O5, tgt=54.87, overall=54.87 ]			(563.49097, 3828.8657)(565.5071, 10906.234)(566.5089, 3305.92)(604.51636, 2258.4668)(564.5221, 1957.71)(582.5135, 4578.38)(587.9288, 39369.79)(587.4952, 15057.898)(588.49677, 1683.4349)(580.5247, 7599.29)
PE(19:0cycv8c/10:0(3-OH))-PAMDB003907	0.96989	0.408732	-0.503484	-7.5462	-0.108088	0.108088	-0.254962	-0.34072	-0.568408	0.344041	0.620467	0.91237	PE(19:0cycv8c/10:0(3-OH))-PAMDB003907	PE(19:0cycv8c/10:0(3-OH))-PAMDB003907 [ C34 H66 N O9 P, tgt=65.65, overall=65.65 ]			(663.4424, 1465290.9)(664.44653, 713105.25)(665.4493, 148740.23)(666.45087, 13995.807)(647.4452, 1678.61)(648.4483, 372.98)(647.4541, 16276.085)(648.4485, 11527.98)(681.47015, 7294.726)(686.42596, 18924.63)(687.42773, 2514.4688)
Ethanesulfonate-PAMDB001731	0.499821	0.168663	0.323982	-0.22031	-0.168663	-0.446417	1.23247	-0.215504	0.644764	2.10604	-18.2142	-18.0973	Ethanesulfonate-PAMDB001731	Ethanesulfonate-PAMDB001731 [ C20 H22 N4 O5, tgt=69.30, overall=69.30 ]			(399.18518, 35345.996)(400.188, 4302.335)
N-Acetyl-L-glutamyl5-phosphate-PAMDB000672	16.8156	16.668	16.2966	16.8397	16.0147	-0.728533	-0.894499	-0.828812	-0.815527	0.0156441	-0.132612	-0.0156441	N-Acetyl-L-glutamyl5-phosphate-PAMDB000672	N-Acetyl-L-glutamyl5-phosphate-PAMDB000672 [ C7 H12 N O8 P, tgt=42.73, overall=42.73 ]			(287.06268, 5936.746)(269.0523, 1928.6549)(292.02036, 5103.23)(275.00543, 7184.435)
DG(18:1(11Z)/0:0/18:1(9Z))-PAMDB006459	24.8984	24.0727	-0.498417	-0.00716972	-0.280809	0.00716782	-0.158798	-0.093111	-0.0798264	0.751345	23.4414	0.720057	DG(18:1(11Z)/0:0/18:1(9Z))-PAMDB006459	DG(18:1(11Z)/0:0/18:1(9Z))-PAMDB006459 [ C39 H72 O5, tgt=34.69, overall=34.69 ]			(625.5742, 18463.03)(626.5768, 5995.15)(603.5174, 64889.25)(604.5235, 14714.08)(638.5687, 4160.66)(625.5756, 937.81)(643.52655, 8208.475)(644.5307, 4159.79)(628.5393, 53107.53)(629.54193, 16587.895)(630.54395, 1202.245)
PG(12:0(3-OH)/19:iso)-PAMDB004052	-0.670749	0.0442247	-0.0792932	-0.0606051	-0.0431986	0.0497141	0.151595	0.118281	0.187457	-0.659783	-1.98031	0.0431986	PG(12:0(3-OH)/19:iso)-PAMDB004052	PG(12:0(3-OH)/19:iso)-PAMDB004052 [ C37 H73 O11 P, tgt=70.90, overall=70.90 ]			(706.4804, 353.95)(742.52435, 35968.926)(743.52704, 12776.613)(744.53094, 758.5485)(731.4699, 1496.48)
PE(14:0(3-OH)/14:0(3-OH))-PAMDB003870	0.474513	-0.0466585	-0.3868	0.117709	0.00126171	-0.00126171	-0.403026	-0.699275	-0.300681	0.960261	0.560555	1.35213	PE(14:0(3-OH)/14:0(3-OH))-PAMDB003870	PE(14:0(3-OH)/14:0(3-OH))-PAMDB003870 [ C33 H66 N O10 P, tgt=60.85, overall=60.85 ]			(689.47894, 9510.766)(690.48193, 1409.514)(667.4661, 15003.136)(668.4687, 2224.1414)
PG(14:0(3-OH)/12:0)-PAMDB004059	0.575754	0.207411	0.0662022	0.228659	0.0963306	-0.0876827	-1.07702	-0.0889358	-1.05029	-0.0662022	-0.622459	0.216705	PG(14:0(3-OH)/12:0)-PAMDB004059	PG(14:0(3-OH)/12:0)-PAMDB004059 [ C32 H63 O11 P, tgt=66.97, overall=66.97 ]			(638.4056, 5712.765)(639.408, 1553.6918)(678.3972, 26740.463)(679.39984, 6747.4546)(680.4018, 267.33)
CoproporphyrinIII-PAMDB000151	-1.35886	7.28363	-1.20385	7.34493	7.26778	7.39787	-0.171855	-2.53727	-0.358563	0.657941	-1.53214	0.171855	CoproporphyrinIII-PAMDB000151	CoproporphyrinIII-PAMDB000151 [ C36 H38 N4 O8, tgt=53.34, overall=53.34 ]			(659.9475, 413126.9)(660.2783, 200123.61)(661.2799, 27816.496)(642.4767, 895.62805)(675.30334, 5167.4976)(676.3067, 584.72003)(654.292, 18508.89)(655.2941, 1836.5166)(677.27386, 2046.6)
Hexadecanoyl-phosphate(n-C16:0)-PAMDB001634	0.179241	-1.89398	0.181007	-20.7057	-20.9794	0.167505	0.0497894	-20.7917	-0.0497894	1.01354	-20.0955	0.784012	Hexadecanoyl-phosphate(n-C16:0)-PAMDB001634	Hexadecanoyl-phosphate(n-C16:0)-PAMDB001634 [ C16 H31 O5 P, tgt=47.26, overall=47.26 ]			(338.20422, 24160.955)(338.2052, 4286.87)(339.20334, 3370.8235)(322.1936, 1175.48)(352.79068, 32563.797)(357.23, 36989.58)(334.8347, 25691.387)(335.2108, 2941.0286)(358.1939, 489.53)(339.16568, 19960.354)
PE(19:0cycv8c/14:0(3-OH))-PAMDB003909	0.288576	0.00779915	0.251215	-19.8859	0.0531902	-19.8716	-0.305359	-0.679287	-0.00779915	0.769482	1.67167	-2.20907	PE(19:0cycv8c/14:0(3-OH))-PAMDB003909	PE(19:0cycv8c/14:0(3-OH))-PAMDB003909 [ C38 H74 N O9 P, tgt=59.06, overall=59.06 ]			(720.85004, 9581.777)(722.1861, 3074.2434)(725.54236, 4948.8203)(720.5144, 8163.06)(721.5156, 1650.9733)(706.09235, 21065.996)(707.23773, 6490.5103)(706.5255, 25553.41)(707.5279, 7951.42)(747.5226, 995.37)
DG(16:0/14:0/0:0)-PAMDB003669	0.367508	0.202709	-0.308622	0.378128	-0.0527611	0.0527611	-1.43602	0.136209	-1.1331	-0.578482	-0.391176	0.182268	DG(16:0/14:0/0:0)-PAMDB003669	DG(16:0/14:0/0:0)-PAMDB003669 [ C33 H64 O5, tgt=75.68, overall=75.68 ]			(547.5098, 50083.402)(523.4621, 12664.34)(559.50934, 99881.125)(560.51196, 30427.25)(561.5141, 4150.3647)(549.4774, 7111.22)
2-Acyl-sn-glycero-3-phosphoethanolamine(N-C18:1)-PAMDB001554	0.448438	-0.0730371	-0.276231	0.235929	-0.0586729	0.0586729	-0.445041	-0.434125	-0.451621	0.389846	0.344615	0.606853	2-Acyl-sn-glycero-3-phosphoethanolamine(N-C18:1)-PAMDB001554	2-Acyl-sn-glycero-3-phosphoethanolamine(N-C18:1)-PAMDB001554 [ C23 H43 N O7 P, tgt=44.03, overall=44.03 ]			(476.29715, 18509.951)(477.2999, 2021.0366)
DG(18:1(9Z)/18:1(9Z)/0:0)-PAMDB003701	24.8984	24.0727	-0.498417	-0.00716972	-0.280809	0.00716782	-0.158798	-0.093111	-0.0798264	0.751345	23.4414	0.720057	DG(18:1(9Z)/18:1(9Z)/0:0)-PAMDB003701	DG(18:1(9Z)/18:1(9Z)/0:0)-PAMDB003701 [ C39 H72 O5, tgt=34.69, overall=34.69 ]			(625.5742, 18463.03)(626.5768, 5995.15)(603.5174, 64889.25)(604.5235, 14714.08)(638.5687, 4160.66)(625.5756, 937.81)(643.52655, 8208.475)(644.5307, 4159.79)(628.5393, 53107.53)(629.54193, 16587.895)(630.54395, 1202.245)
11-Methyldodecanoic acid_BMDB62091	-0.292779	0.375888	-18.7655	-18.2743	-0.299943	-0.493341	2.84762	0.850562	0.292779	1.69568	-17.664	2.10306	11-Methyldodecanoic acid_BMDB62091	11-Methyldodecanoic acid_BMDB62091 [ C13 H26 O2, tgt=66.22, overall=66.22 ]			(219.17046, 48790.883)(220.17351, 4494.338)
Glycyl-Serine_BMDB62236	0.816804	-0.436738	0.307845	-18.9195	-19.1931	0.258758	0.645802	-19.0054	-0.258758	1.47146	-18.3092	1.22805	Glycyl-Serine_BMDB62236	Glycyl-Serine_BMDB62236 [ C5 H10 N2 O4, tgt=81.93, overall=81.93 ]			(180.09885, 38913.04)(181.10196, 1933.615)
PE(10:0(3-OH)/16:1(9Z))-PAMDB003838	0.549273	1.17395	0.496918	-17.4192	-0.496918	-0.778254	-0.956808	1.18223	1.52521	-16.6607	2.06488	-16.692	PE(10:0(3-OH)/16:1(9Z))-PAMDB003838	PE(10:0(3-OH)/16:1(9Z))-PAMDB003838 [ C31 H60 N O9 P, tgt=49.32, overall=49.32 ]			(625.39716, 32944.117)(626.4001, 10107.3)(627.4022, 811.53)(625.3987, 29470.27)(626.40137, 8921.395)(627.4052, 179.86)(643.942, 32057.672)(643.4272, 16415.998)(644.4292, 5583.65)(623.44165, 17659.357)(624.44415, 2034.9135)(647.37964, 11417.975)(648.3823, 1688.5051)
PGP(17:0/17:0)-PAMDB006418	0.160475	0.138462	0.198771	-16.5747	-16.8484	-16.5604	0.245966	-16.6607	-0.138462	1.61568	-15.9645	0.660089	PGP(17:0/17:0)-PAMDB006418	PGP(17:0/17:0)-PAMDB006418 [ C40 H80 O13 P2, tgt=15.77, overall=15.77 ]			(854.4847, 8513.453)(855.48724, 2391.1914)
4-Nitrophenol-PAMDB000305	-0.443278	0.989938	1.24381	-16.6672	-16.9409	0.443278	-16.8189	0.998233	1.33156	-15.9087	2.03177	-15.94	4-Nitrophenol-PAMDB000305	4-Nitrophenol-PAMDB000305 [ C6 H5 N O3, tgt=47.62, overall=47.62 ]			(143.0345, 397.14)(141.03682, 5547.547)(142.0385, 1707.86)(159.0657, 626.17)(140.05373, 3481.4082)(163.02191, 3827.335)
PE(19:0cycw8c/17:0cycw7c)-PAMDB002028	1.19933	1.08881	-16.7042	-16.213	-16.4866	-16.1987	-0.131385	-16.2989	0.131385	0.692618	0.911647	2.63672	PE(19:0cycw8c/17:0cycw7c)-PAMDB002028	PE(19:0cycw8c/17:0cycw7c)-PAMDB002028 [ C43 H82 N O8 P, tgt=11.89, overall=11.89 ]			(772.5994, 4728.447)(773.6, 474.89502)(760.57117, 23421.84)(777.5552, 1584.39)
PE(14:0(3-OH)/16:1(9Z))-PAMDB003874	0.669246	-0.562436	-0.0661993	0.767516	-0.0490198	0.0490198	-0.474324	-0.474256	-20.5669	0.342788	0.217937	0.46161	PE(14:0(3-OH)/16:1(9Z))-PAMDB003874	PE(14:0(3-OH)/16:1(9Z))-PAMDB003874 [ C35 H68 N O9 P, tgt=69.51, overall=69.51 ]			(678.46674, 25124.46)(679.469, 6413.2886)
Phenylpyruvicacid-PAMDB000084	-0.260092	3.64784	2.6446	-0.66021	-17.3644	0.260092	-17.2424	0.631498	1.04216	-16.3322	1.18379	-16.3635	Phenylpyruvicacid-PAMDB000084	Phenylpyruvicacid-PAMDB000084 [ C9 H8 O3, tgt=77.29, overall=77.29 ]			(165.76433, 1437.3643)(166.0495, 1057.77)(168.0619, 6074.33)(168.0622, 3674.9368)(150.05258, 25739.195)(151.05484, 2461.705)(182.07724, 7379.328)(164.07034, 533.01)(188.03935, 6448.61)
PS(16:1(9Z)/12:0)-PAMDB006448	1.79474	1.05255	0.380683	0.391299	-0.00874615	0.00874615	-0.187001	-1.01342	-0.34769	-18.4511	-0.568616	1.27033	PS(16:1(9Z)/12:0)-PAMDB006448	PS(16:1(9Z)/12:0)-PAMDB006448 [ C34 H64 N O10 P, tgt=53.91, overall=53.91 ]			(661.42584, 13362.39)(662.4287, 3176.4475)(663.44165, 2712.48)(664.44446, 788.2)(661.42487, 30177.045)(662.4277, 10182.8125)(663.4418, 79667.8)(664.4452, 32786.88)(665.4477, 5943.8643)(666.4501, 603.99194)(680.46594, 801.20856)(681.468, 651.15497)(685.42145, 2093.57)(686.4242, 1029.0775)(687.4268, 151.86)
PS(18:1(9Z)/16:1(9Z))-PAMDB006271	21.4702	21.9597	-1.15999	21.7291	21.6919	-0.654404	-0.82037	-0.754683	-0.741398	0.0897732	-0.0584831	0.058485	PS(18:1(9Z)/16:1(9Z))-PAMDB006271	PS(18:1(9Z)/16:1(9Z))-PAMDB006271 [ C40 H74 N O10 P, tgt=20.27, overall=20.27 ]			(764.0016, 2805.145)(764.5033, 3506.35)(742.5227, 34755.594)(743.5254, 12374.925)(744.5292, 1034.845)
Pantothenicacid-PAMDB000085	0.915507	0.0740232	0.350911	-0.532386	-0.279811	0.162465	0.808099	-0.789317	-0.0740232	1.40839	-16.893	-16.7761	Pantothenicacid-PAMDB000085	Pantothenicacid-PAMDB000085 [ C9 H17 N O5, tgt=77.28, overall=77.28 ]			(246.10483, 424.83798)(237.14058, 11741.154)(224.12338, 10948.51)(222.14258, 41039.46)(223.14542, 2979.329)
Ketoleucine-PAMDB000174	-0.447957	1.07109	0.382478	-17.5021	-17.7757	-0.382478	-0.906062	-0.537055	0.497899	0.611827	0.863551	1.15864	Ketoleucine-PAMDB000174	Ketoleucine-PAMDB000174 [ C6 H10 O3, tgt=78.24, overall=78.24 ]			(112.0485, 14707.5)(132.07454, 452542.9)(133.07709, 13871.417)(134.0784, 646.1725)(114.06407, 28150.145)(115.8456, 2830.8323)(130.08334, 3584.5532)(154.0548, 214.25)(137.75058, 23559.83)(138.55368, 30333.332)(139.055, 5639.88)
PG(14:0(3-OH)/14:0)-PAMDB004061	-0.393725	7.65827	-0.813796	7.30236	7.11152	7.33118	0.132567	-1.34592	-0.132567	1.2449	-17.5983	-17.4813	PG(14:0(3-OH)/14:0)-PAMDB004061	PG(14:0(3-OH)/14:0)-PAMDB004061 [ C34 H67 O11 P, tgt=35.81, overall=35.81 ]			(664.44507, 798874.7)(665.4479, 171228.62)(666.4496, 16415.838)(688.0221, 11848.971)(689.4213, 4850.6133)
DG(16:1(9Z)/14:0/0:0)-PAMDB003678	2.44244	3.94519	-0.00271988	0.396084	2.80842	-22.6297	0.329378	-0.0246811	0.00271988	-21.8856	-22.0338	-21.9169	DG(16:1(9Z)/14:0/0:0)-PAMDB003678	DG(16:1(9Z)/14:0/0:0)-PAMDB003678 [ C33 H62 O5, tgt=51.88, overall=51.88 ]			(521.44574, 32789.2)(522.5953, 11966.198)(523.6059, 281388.94)(524.46576, 94743.79)(525.4678, 10648.46)(560.99774, 34082.01)(561.4998, 54565.965)(538.4795, 16152.37)(561.4629, 445.1)(543.5609, 52618.867)(544.64355, 15427.901)(545.6474, 1120.224)(547.459, 5154.6)
PS(12:0(3-OH)/14:0)-PAMDB003947	10.2384	9.77438	9.71506	-8.66798	8.05598	-8.65365	8.50859	-8.75393	7.90947	-7.90947	-8.05773	-7.94076	PS(12:0(3-OH)/14:0)-PAMDB003947	PS(12:0(3-OH)/14:0)-PAMDB003947 [ C32 H60 N O11 P, tgt=61.77, overall=61.77 ]			(647.37866, 10765.544)(648.38165, 1574.8334)
[truncated: 1,026 more rows]

## Sheet: Dichloromethane_heat
Compound	T1CN_rep1	T1CN_rep2	T1CN_rep3	T1PF_rep1	T1PF_rep2	T1PF_rep3	T6CN_rep1	T6CN_rep2	T6CN_rep3	T6PF_rep1	T6PF_rep2	T6PF_rep3	Alignment Value	Annotations	CAS Number	ChEBI ID	CompositeSpectrum
[truncated: 2,028 more rows]

## Sheet: Methanol_no-heat
Compound	T1CN_rep1	T1CN_rep2	T1CN_rep3	T1PF_rep1	T1PF_rep2	T1PF_rep3	T6CN_rep1	T6CN_rep2	T6CN_rep3	T6PF_rep1	T6PF_rep2	T6PF_rep3	Alignment Value	Annotations	CAS Number	ChEBI ID	CompositeSpectrum
[truncated: 2,038 more rows]

[truncated: 1 more sheets: Methanol_heat]
