# Supplementary material for: A Milk Foodomics Investigation into the Effect of Pseudomonas fluorescens Growth under Cold Chain Conditions
Source: Foods. 2021 May 24;10(6):1173. doi: 10.3390/foods10061173 (PMC8225104; doi:10.3390/foods10061173)
Supplement: Supplementary file 1 [file foods-10-01173-s001.zip › Bellassi et al S4 Peptide Dataset.xlsx]

## Sheet: Peptide matrix
		Alpha-S2-casein	Alpha-S2-casein	Beta-casein	Alpha-S2-casein	Alpha-S2-casein	Alpha-lactalbumin	Alpha-S2-casein	Alpha-S1-casein	Alpha-S1-casein	Alpha-lactalbumin	Alpha-S1-casein	Alpha-S2-casein	Beta-casein	Beta-casein	Alpha-S2-casein	Beta-casein	Beta-casein	Beta-casein	Alpha-S1-casein
sample name	var	(K)TKVIPYVR(Y)	(K)VIPYVR(Y)	(K)VKEAMAPK(H)	(K)TKVIPYVRYL(-)	(K)VIPYVRYL(-)	(K)ALCSEKLDQWLCEKL(-)	(K)AMKPWIQPK(T)	(K)HIQKEDVPSER(Y)	(K)HQGLPQEVLNENLLR(F)	(K)ILDKVGINYWLAHK(A)	(R)FFVAPFPEVFGK(E)	(R)NAVPITPTLNR(E)	(K)AVPYPQR(D)	(K)EMPFPK(Y)	(K)FALPQYLK(T)	(K)HKEMPFPK(Y)	(K)VLPVPQK(A)	(K)VLPVPQKAVPYPQR(D)	(R)FFVAPFPEVFGKEK(V)
T1CN rep1	T1CN	132000	118000	241000	0	0	0	0	0	0	0	0	0	0	0	0	0	0	0	0
T1CN rep2	T1CN	129000	0	292000	0	0	0	0	0	0	0	0	0	0	0	0	0	0	0	0
T1CN rep3	T1CN	134000	0	0	0	0	0	0	0	0	0	0	0	0	0	0	0	0	0	0
T1PF rep1	T1PF	0	0	0	9810	6100	0	0	0	0	0	0	0	0	0	0	0	0	0	0
T1PF rep2	T1PF	0	0	0	0	0	0	0	0	0	0	0	0	0	0	0	0	0	0	0
T1PF rep3	T1PF	0	0	0	5600	12000	0	0	0	0	0	0	0	0	0	0	0	0	0	0
T6CN rep1	T6CN	467000	356000	802000	0	0	4850	54400	7680	23430	5330	4200	10000	0	0	0	0	0	0	0
T6CN rep2	T6CN	736000	0	956000	0	0	4350	82500	6200	15900	5570	0	7050	0	0	0	0	0	0	0
T6CN rep3	T6CN	0	0	0	0	0	0	0	0	0	0	0	0	0	0	0	0	0	0	0
T6PF rep1	T6PF	1080000	1070000	1090000	16330	15200	12600	392000	0	38200	5230	14300	7410	4170000	340000	147000	39600	10600000	1638780	5340
T6PF rep2	T6PF	1110000	1290000	1830000	22300	18700	14500	499000	0	56200	5120	18200	8940	4500000	322000	167000	140000	10700000	2053280	6050
T6PF rep3	T6PF	997000	1440000	1930000	20310	18600	14400	486000	0	53400	0	17800	7670	3760000	319000	0	119000	11600000	1825420	0
